# Supplementary material for: Transcriptomic and Proteomic Analyses of Nepenthes ampullaria and Nepenthes rafflesiana Reveal Parental Molecular Expression in the Pitchers of Their Hybrid, Nepenthes × hookeriana
Source: Front Plant Sci. 2021 Jan 20;11:625507. doi: 10.3389/fpls.2020.625507 (PMC7855304; doi:10.3389/fpls.2020.625507)
Supplement: Supplementary Table 3 — Summary of KO analysis. [file Table_3.XLSX]

## Sheet: MaxQuant
Results from MaxQuant Analysis based on three digestion settings.
Digestion	Protein IDs	Majority protein IDs	Leading Protein	BlastP/X	Peptide counts (all)	Peptide counts (razor+unique)	Peptide counts (unique)	Fasta headers	Number of proteins	Peptides	Razor + unique peptides	Unique peptides	Peptides amp	Peptides hook	Peptides raff	Razor + unique peptides amp	Razor + unique peptides hook	Razor + unique peptides raff	Unique peptides amp	Unique peptides hook	Unique peptides raff	Sequence coverage [%]	Unique + razor sequence coverage [%]	Unique sequence coverage [%]	Mol. weight [kDa]	Sequence length	Sequence lengths	Q-value	Score	Identification type amp	Identification type hook	Identification type raff	Sequence coverage amp [%]	Sequence coverage hook [%]	Sequence coverage raff [%]	Intensity	Intensity amp	Intensity hook	Intensity raff	LFQ intensity amp	LFQ intensity hook	LFQ intensity raff	MS/MS Count amp	MS/MS Count hook	MS/MS Count raff	MS/MS Count	Only identified by site	Reverse	Potential contaminant
Specific	c171049/1/1434|m.73671	c171049/1/1434|m.73671	c171049/1/1434|m.73671	LTPG1_ARATH^LTPG1_ARATH^Q:56-150,H:34-132^33.333%ID^E:9.23e-12^RecName: Full=Non-specific lipid transfer protein GPI-anchored 1;^Eukaryota; Viridiplantae; Streptophyta; Embryophyta; Tracheophyta; Spermatophyta; Magnoliophyta; eudicotyledons; Gunneridae; Pentapetalae; rosids; malvids; Brassicales; Brassicaceae; Camelineae; Arabidopsis	3	3	3		1	3	3	3	2	1	3	2	1	3	2	1	3	14.7	14.7	14.7	25.128	224	224	0	323.31	By MS/MS	By MS/MS	By MS/MS	11.2	4	14.7	1391900000	18757000	8412000	1364700000	41107000	0	356060000	5	4	39	48
Specific	c11776/1/1564|m.11174	c11776/1/1564|m.11174	c11776/1/1564|m.11174	LYM1_ARATH^LYM1_ARATH^Q:4-261,H:5-259^75.194%ID^E:4.69e-135^RecName: Full=LysM domain-containing GPI-anchored protein 1;^Eukaryota; Viridiplantae; Streptophyta; Embryophyta; Tracheophyta; Spermatophyta; Magnoliophyta; eudicotyledons; Gunneridae; Pentapetalae; rosids; malvids; Brassicales; Brassicaceae; Camelineae; Arabidopsis	2	2	2		1	2	2	2	0	1	2	0	1	2	0	1	2	4.1	4.1	4.1	33.227	314	314	0	112.53		By MS/MS	By MS/MS	0	3.8	4.1	31055000	0	31055000	0	0	9736800	0	0	5	3	8
Specific	c169425/1/1107|m.72452	c169425/1/1107|m.72452	c169425/1/1107|m.72452	PT311_ARATH^PT311_ARATH^Q:599-943,H:147-261^83.478%ID^E:4.08e-57^RecName: Full=Probable sugar phosphate/phosphate translocator At3g11320;^Eukaryota; Viridiplantae; Streptophyta; Embryophyta; Tracheophyta; Spermatophyta; Magnoliophyta; eudicotyledons; Gunneridae; Pentapetalae; rosids; malvids; Brassicales; Brassicaceae; Camelineae; Arabidopsis	2	2	2		1	2	2	2	1	1	2	1	1	2	1	1	2	11.6	11.6	11.6	13.629	121	121	0	11.958	By matching	By matching	By MS/MS	5.8	5.8	11.6	22480000	1660600	13471000	7348500	0	0	16064000	0	0	1	1
Specific	c260018/1/1566|m.101832	c260018/1/1566|m.101832	c260018/1/1566|m.101832	AAP3_ARATH^AAP3_ARATH^Q:1-246,H:123-368^73.984%ID^E:3.04e-131^RecName: Full=Amino acid permease 3;^Eukaryota; Viridiplantae; Streptophyta; Embryophyta; Tracheophyta; Spermatophyta; Magnoliophyta; eudicotyledons; Gunneridae; Pentapetalae; rosids; malvids; Brassicales; Brassicaceae; Camelineae; Arabidopsis	1	1	1		1	1	1	1	1	0	0	1	0	0	1	0	0	8.9	8.9	8.9	28.025	257	257	0.0076923	5.9596	By MS/MS			8.9	0	0	0	0	0	0	0	0	0	1	0	0	1
Specific	c72611/1/1376|m.40101	c72611/1/1376|m.40101	c72611/1/1376|m.40101	AAPC_CENCI^AAPC_CENCI^Q:81-1127,H:25-326^34.366%ID^E:3.27e-44^RecName: Full=Putative glucose-6-phosphate 1-epimerase;^Eukaryota; Viridiplantae; Streptophyta; Embryophyta; Tracheophyta; Spermatophyta; Magnoliophyta; Liliopsida; Poales; Poaceae; PACMAD clade; Panicoideae; Paniceae; Cenchrus`AAPC_CENCI^AAPC_CENCI^Q:616-747,H:153-198^67.391%ID^E:6.23e-10^RecName: Full=Putative glucose-6-phosphate 1-e…	1	1	1		1	1	1	1	1	0	0	1	0	0	1	0	0	4	4	4	20.442	177	177	0.0064103	5.9596	By MS/MS			4	0	0	2384200	2384200	0	0	1165300	0	0	1	0	0	1
Specific	c305237/1/1853|m.29072	c305237/1/1853|m.29072	c305237/1/1853|m.29072	AB15G_ARATH^AB15G_ARATH^Q:40-119,H:415-493^41.25%ID^E:1.66e-09^RecName: Full=ABC transporter G family member 15;^Eukaryota; Viridiplantae; Streptophyta; Embryophyta; Tracheophyta; Spermatophyta; Magnoliophyta; eudicotyledons; Gunneridae; Pentapetalae; rosids; malvids; Brassicales; Brassicaceae; Camelineae; Arabidopsis	1	1	1		1	1	1	1	0	1	1	0	1	1	0	1	1	17.2	17.2	17.2	15.063	134	134	0.0070922	5.9596		By MS/MS	By MS/MS	0	17.2	17.2	0	0	0	0	0	0	0	0	1	1	2
Specific	c71949/1/1957|m.39569	c71949/1/1957|m.39569	c71949/1/1957|m.39569	AB1B_ARATH^AB1B_ARATH^Q:1-225,H:993-1218^74.336%ID^E:2.54e-109^RecName: Full=ABC transporter B family member 1;^Eukaryota; Viridiplantae; Streptophyta; Embryophyta; Tracheophyta; Spermatophyta; Magnoliophyta; eudicotyledons; Gunneridae; Pentapetalae; rosids; malvids; Brassicales; Brassicaceae; Camelineae; Arabidopsis`AB1B_ARATH^AB1B_ARATH^Q:4-225,H:341-562^45.291%ID^E:3.17e-56^RecName: Full=ABC t…	1	1	1		1	1	1	1	0	1	1	0	1	1	0	1	1	3	3	3	25.658	230	230	0.0064516	5.9596		By matching	By MS/MS	0	3	3	34137000	0	2600900	31536000	0	0	62855000	0	0	1	1
Specific	c303557/1/1589|m.28281	c303557/1/1589|m.28281	c303557/1/1589|m.28281	ACR6_ARATH^ACR6_ARATH^Q:2-353,H:3-348^69.688%ID^E:5.28e-176^RecName: Full=ACT domain-containing protein ACR6 {ECO:0000305};^Eukaryota; Viridiplantae; Streptophyta; Embryophyta; Tracheophyta; Spermatophyta; Magnoliophyta; eudicotyledons; Gunneridae; Pentapetalae; rosids; malvids; Brassicales; Brassicaceae; Camelineae; Arabidopsis	1	1	1		1	1	1	1	0	0	1	0	0	1	0	0	1	5.9	5.9	5.9	44.768	390	390	0.0071429	5.9596			By MS/MS	0	0	5.9	0	0	0	0	0	0	0	0	0	1	1
Specific	c62563/1/2189|m.32365	c62563/1/2189|m.32365	c62563/1/2189|m.32365	ACT_CHLRE^ACT_CHLRE^Q:370-1671,H:20-377^29.68%ID^E:2.7e-12^RecName: Full=Actin;^Eukaryota; Viridiplantae; Chlorophyta; Chlorophyceae; Chlamydomonadales; Chlamydomonadaceae; Chlamydomonas`ACT_CHLRE^ACT_CHLRE^Q:360-962,H:17-183^34.653%ID^E:6.09e-09^RecName: Full=Actin;^Eukaryota; Viridiplantae; Chlorophyta; Chlorophyceae; Chlamydomonadales; Chlamydomonadaceae; Chlamydomonas	1	1	1		1	1	1	1	1	0	0	1	0	0	1	0	0	17.6	17.6	17.6	14.839	131	131	0.02381	5.9791	By MS/MS			17.6	0	0	0	0	0	0	0	0	0	1	0	0	1
Specific	c266391/1/1705|m.15882	c266391/1/1705|m.15882	c266391/1/1705|m.15882	ACT7_ARATH^ACT7_ARATH^Q:296-811,H:31-204^75.862%ID^E:1.45e-130^RecName: Full=Actin-7;^Eukaryota; Viridiplantae; Streptophyta; Embryophyta; Tracheophyta; Spermatophyta; Magnoliophyta; eudicotyledons; Gunneridae; Pentapetalae; rosids; malvids; Brassicales; Brassicaceae; Camelineae; Arabidopsis`ACT7_ARATH^ACT7_ARATH^Q:808-1326,H:204-377^70.33%ID^E:1.45e-130^RecName: Full=Actin-7;^Eukaryota; Viridipl…	1	1	1		1	1	1	1	1	0	0	1	0	0	1	0	0	16.2	16.2	16.2	16.128	142	142	0.0075188	5.9596	By MS/MS			16.2	0	0	0	0	0	0	0	0	0	1	0	0	1
Specific	c202940/2/1519|m.78658	c202940/2/1519|m.78658	c202940/2/1519|m.78658	ACTG_EMENI^ACTG_EMENI^Q:1-203,H:82-284^99.015%ID^E:3.82e-142^RecName: Full=Actin, gamma;^Eukaryota; Fungi; Dikarya; Ascomycota; Pezizomycotina; Eurotiomycetes; Eurotiomycetidae; Eurotiales; Aspergillaceae; Aspergillus	1	1	1		1	1	1	1	1	0	0	1	0	0	1	0	0	5.3	5.3	5.3	34.296	303	303	0	323.31	By MS/MS			5.3	0	0	21102000	21102000	0	0	6950100	0	0	21	0	0	21
Specific	c257030/1/2238|m.99669	c257030/1/2238|m.99669	c257030/1/2238|m.99669	ADT_PARKE^ADT_PARKE^Q:9-138,H:150-276^32.836%ID^E:2.64e-08^RecName: Full=ADP,ATP carrier protein;^Eukaryota; Viridiplantae; Chlorophyta; Trebouxiophyceae; Chlorellales; Chlorellales incertae sedis; Parachlorella	1	1	1		1	1	1	1	1	0	0	1	0	0	1	0	0	8.5	8.5	8.5	29.422	272	272	0.0078431	5.9596	By MS/MS			8.5	0	0	0	0	0	0	0	0	0	1	0	0	1
Specific	c169078/1/1269|m.72152	c169078/1/1269|m.72152	c169078/1/1269|m.72152	ALF_CICAR^ALF_CICAR^Q:7-51,H:22-66^80%ID^E:1.92e-15^RecName: Full=Fructose-bisphosphate aldolase, cytoplasmic isozyme;^Eukaryota; Viridiplantae; Streptophyta; Embryophyta; Tracheophyta; Spermatophyta; Magnoliophyta; eudicotyledons; Gunneridae; Pentapetalae; rosids; fabids; Fabales; Fabaceae; Papilionoideae; Cicereae; Cicer	1	1	1		1	1	1	1	1	0	0	1	0	0	1	0	0	22.3	22.3	22.3	11.445	103	103	0.010582	5.9596	By MS/MS			22.3	0	0	0	0	0	0	0	0	0	1	0	0	1
Specific	c129101/1/1493|m.60599	c129101/1/1493|m.60599	c129101/1/1493|m.60599	ASR1_SOLLC^ASR1_SOLLC^Q:147-215,H:22-90^88.406%ID^E:3.03e-23^RecName: Full=Abscisic stress-ripening protein 1;^Eukaryota; Viridiplantae; Streptophyta; Embryophyta; Tracheophyta; Spermatophyta; Magnoliophyta; eudicotyledons; Gunneridae; Pentapetalae; asterids; lamiids; Solanales; Solanaceae; Solanoideae; Solaneae; Solanum; Lycopersicon	1	1	1		1	1	1	1	1	0	1	1	0	1	1	0	1	2.8	2.8	2.8	27.055	249	249	0.012739	5.9596	By MS/MS		By matching	2.8	0	2.8	1392000	911080	0	480940	0	0	1553800	1	0	0	1
Specific	c3973/1/1277|m.4019	c3973/1/1277|m.4019	c3973/1/1277|m.4019	B561G_ARATH^B561G_ARATH^Q:16-405,H:14-404^68.957%ID^E:0^RecName: Full=Cytochrome b561 and DOMON domain-containing protein At2g04850;^Eukaryota; Viridiplantae; Streptophyta; Embryophyta; Tracheophyta; Spermatophyta; Magnoliophyta; eudicotyledons; Gunneridae; Pentapetalae; rosids; malvids; Brassicales; Brassicaceae; Camelineae; Arabidopsis	1	1	1		1	1	1	1	1	0	0	1	0	0	1	0	0	5.7	5.7	5.7	44.506	405	405	0.0068259	5.9596	By MS/MS			5.7	0	0	0	0	0	0	0	0	0	2	0	0	2
Specific	c113312/1/1518|m.48851	c113312/1/1518|m.48851	c113312/1/1518|m.48851	BLH7_ARATH^BLH7_ARATH^Q:128-1147,H:92-482^44.146%ID^E:4.83e-93^RecName: Full=BEL1-like homeodomain protein 7;^Eukaryota; Viridiplantae; Streptophyta; Embryophyta; Tracheophyta; Spermatophyta; Magnoliophyta; eudicotyledons; Gunneridae; Pentapetalae; rosids; malvids; Brassicales; Brassicaceae; Camelineae; Arabidopsis	1	1	1		1	1	1	1	1	0	0	1	0	0	1	0	0	11.8	11.8	11.8	12.757	110	110	0.016807	5.9596	By MS/MS			11.8	0	0	4948600	4948600	0	0	1727400	0	0	1	0	0	1
Specific	c116534/1/1641|m.51253	c116534/1/1641|m.51253	c116534/1/1641|m.51253	BRM_ARATH^BRM_ARATH^Q:1-408,H:1188-1595^86.275%ID^E:0^RecName: Full=ATP-dependent helicase BRM;^Eukaryota; Viridiplantae; Streptophyta; Embryophyta; Tracheophyta; Spermatophyta; Magnoliophyta; eudicotyledons; Gunneridae; Pentapetalae; rosids; malvids; Brassicales; Brassicaceae; Camelineae; Arabidopsis	1	1	1		1	1	1	1	0	1	0	0	1	0	0	1	0	3	3	3	50.978	438	438	0.015385	5.9596		By MS/MS		0	3	0	8862600	0	8862600	0	0	4039100	0	0	1	0	1
Specific	c68231/1/1322|m.36598	c68231/1/1322|m.36598	c68231/1/1322|m.36598	BURP3_ORYSJ^BURP3_ORYSJ^Q:94-309,H:192-427^44.813%ID^E:5.1e-51^RecName: Full=BURP domain-containing protein 3;^Eukaryota; Viridiplantae; Streptophyta; Embryophyta; Tracheophyta; Spermatophyta; Magnoliophyta; Liliopsida; Poales; Poaceae; BEP clade; Ehrhartoideae; Oryzeae; Oryza	1	1	1		1	1	1	1	1	0	0	1	0	0	1	0	0	4.2	4.2	4.2	34.821	310	310	0.0065574	5.9596	By MS/MS			4.2	0	0	618350	618350	0	0	215840	0	0	1	0	0	1
Specific	c61646/1/2146|m.31694	c61646/1/2146|m.31694	c61646/1/2146|m.31694	C3H19_ARATH^C3H19_ARATH^Q:1-347,H:1128-1466^36.828%ID^E:2.82e-40^RecName: Full=Zinc finger CCCH domain-containing protein 19;^Eukaryota; Viridiplantae; Streptophyta; Embryophyta; Tracheophyta; Spermatophyta; Magnoliophyta; eudicotyledons; Gunneridae; Pentapetalae; rosids; malvids; Brassicales; Brassicaceae; Camelineae; Arabidopsis	1	1	1		1	1	1	1	1	0	1	1	0	1	1	0	1	2.6	2.6	2.6	53.606	503	503	0.022472	5.9729	By matching		By MS/MS	2.6	0	2.6	43387000	5429800	0	37957000	3283600	0	0	0	0	1	1
Specific	c126048/2/1870|m.58292	c126048/2/1870|m.58292	c126048/2/1870|m.58292	C71DB_LOTJA^C71DB_LOTJA^Q:40-113,H:12-86^37.333%ID^E:2.55e-09^RecName: Full=Cytochrome P450 71D11;^Eukaryota; Viridiplantae; Streptophyta; Embryophyta; Tracheophyta; Spermatophyta; Magnoliophyta; eudicotyledons; Gunneridae; Pentapetalae; rosids; fabids; Fabales; Fabaceae; Papilionoideae; Loteae; Lotus	1	1	1		1	1	1	1	0	1	0	0	1	0	0	1	0	5.5	5.5	5.5	14.41	127	127	0.013423	5.9596		By MS/MS		0	5.5	0	6883300	0	6883300	0	0	3137100	0	0	1	0	1
Specific	c34302/1/2534|m.22814	c34302/1/2534|m.22814	c34302/1/2534|m.22814	CB2G_SOLLC^CB2G_SOLLC^Q:1401-2105,H:16-255^40.083%ID^E:2.64e-28^RecName: Full=Chlorophyll a-b binding protein 3C, chloroplastic;^Eukaryota; Viridiplantae; Streptophyta; Embryophyta; Tracheophyta; Spermatophyta; Magnoliophyta; eudicotyledons; Gunneridae; Pentapetalae; asterids; lamiids; Solanales; Solanaceae; Solanoideae; Solaneae; Solanum; Lycopersicon`CB2G_SOLLC^CB2G_SOLLC^Q:1522-2139,H:58-267^3…	1	1	1		1	1	1	1	1	0	0	1	0	0	1	0	0	12.2	12.2	12.2	22.098	188	188	0.0069444	5.9596	By MS/MS			12.2	0	0	0	0	0	0	0	0	0	1	0	0	1
Specific	c201270/1/1381|m.77287	c201270/1/1381|m.77287	c201270/1/1381|m.77287	CBHC_ASPTN^CBHC_ASPTN^Q:2-186,H:283-464^58.065%ID^E:1.35e-62^RecName: Full=Probable 1,4-beta-D-glucan cellobiohydrolase C;^Eukaryota; Fungi; Dikarya; Ascomycota; Pezizomycotina; Eurotiomycetes; Eurotiomycetidae; Eurotiales; Aspergillaceae; Aspergillus	1	1	1		1	1	1	1	0	0	1	0	0	1	0	0	1	3.3	3.3	3.3	22.653	213	213	0.009901	5.9596			By MS/MS	0	0	3.3	2895800	0	0	2895800	0	0	9355800	0	0	1	1
Specific	c123053/1/2151|m.56112	c123053/1/2151|m.56112	c123053/1/2151|m.56112	CCA2_SCHPO^CCA2_SCHPO^Q:3-444,H:65-480^33.333%ID^E:5.16e-67^RecName: Full=Putative CCA tRNA nucleotidyltransferase 2;^Eukaryota; Fungi; Dikarya; Ascomycota; Taphrinomycotina; Schizosaccharomycetes; Schizosaccharomycetales; Schizosaccharomycetaceae; Schizosaccharomyces	1	1	1		1	1	1	1	0	1	0	0	1	0	0	1	0	2.9	2.9	2.9	51.616	454	454	0.022989	5.9729		By MS/MS		0	2.9	0	7836000	0	7836000	0	0	3571300	0	0	1	0	1
Specific	c31720/1/1560|m.20688	c31720/1/1560|m.20688	c31720/1/1560|m.20688	CD48B_ARATH^CD48B_ARATH^Q:1-457,H:1-451^75.109%ID^E:0^RecName: Full=Cell division control protein 48 homolog B;^Eukaryota; Viridiplantae; Streptophyta; Embryophyta; Tracheophyta; Spermatophyta; Magnoliophyta; eudicotyledons; Gunneridae; Pentapetalae; rosids; malvids; Brassicales; Brassicaceae; Camelineae; Arabidopsis`CD48B_ARATH^CD48B_ARATH^Q:25-280,H:288-535^33.716%ID^E:2.84e-32^RecName: Full=Ce…	1	1	1		1	1	1	1	0	0	1	0	0	1	0	0	1	1.5	1.5	1.5	50.434	464	464	0.0070175	5.9596			By MS/MS	0	0	1.5	152790000	0	0	152790000	0	0	306890000	0	0	1	1
Specific	c9510/1/1401|m.9156	c9510/1/1401|m.9156	c9510/1/1401|m.9156	CDS1_ARATH^CDS1_ARATH^Q:27-214,H:216-408^36.41%ID^E:1.51e-14^RecName: Full=Phosphatidate cytidylyltransferase;^Eukaryota; Viridiplantae; Streptophyta; Embryophyta; Tracheophyta; Spermatophyta; Magnoliophyta; eudicotyledons; Gunneridae; Pentapetalae; rosids; malvids; Brassicales; Brassicaceae; Camelineae; Arabidopsis	1	1	1		1	1	1	1	0	1	0	0	1	0	0	1	0	10.2	10.2	10.2	25.579	225	225	0.00625	5.9596		By MS/MS		0	10.2	0	0	0	0	0	0	0	0	0	1	0	1
Specific	c291278/2/1394|m.74365	c291278/2/1394|m.74365	c291278/2/1394|m.74365	CESA1_ORYSJ^CESA1_ORYSJ^Q:42-123,H:751-831^95.122%ID^E:5.47e-47^RecName: Full=Probable cellulose synthase A catalytic subunit 1 [UDP-forming];^Eukaryota; Viridiplantae; Streptophyta; Embryophyta; Tracheophyta; Spermatophyta; Magnoliophyta; Liliopsida; Poales; Poaceae; BEP clade; Ehrhartoideae; Oryzeae; Oryza	1	1	1		1	1	1	1	1	0	0	1	0	0	1	0	0	5.5	5.5	5.5	14.609	128	128	0.032258	6.1536	By MS/MS			5.5	0	0	7021600	7021600	0	0	7021600	0	0	1	0	0	1
Specific	c253951/1/2205|m.97344	c253951/1/2205|m.97344	c253951/1/2205|m.97344	CESA8_ORYSJ^CESA8_ORYSJ^Q:1-128,H:354-481^84.375%ID^E:3.65e-69^RecName: Full=Probable cellulose synthase A catalytic subunit 8 [UDP-forming];^Eukaryota; Viridiplantae; Streptophyta; Embryophyta; Tracheophyta; Spermatophyta; Magnoliophyta; Liliopsida; Poales; Poaceae; BEP clade; Ehrhartoideae; Oryzeae; Oryza	1	1	1		1	1	1	1	0	1	0	0	1	0	0	1	0	4.8	4.8	4.8	16.939	147	147	0.0080972	5.9596		By MS/MS		0	4.8	0	3189400	0	3189400	0	0	1967700	0	0	1	0	1
Specific	c7587/1/1819|m.7342	c7587/1/1819|m.7342	c7587/1/1819|m.7342	CFXQ_CYAME^CFXQ_CYAME^Q:11-164,H:58-219^40.244%ID^E:2.48e-35^RecName: Full=Protein cfxQ homolog;^Eukaryota; Rhodophyta; Bangiophyceae; Cyanidiales; Cyanidiaceae; Cyanidioschyzon	1	1	1		1	1	1	1	0	1	0	0	1	0	0	1	0	9.3	9.3	9.3	27.664	247	247	0.0063291	5.9596		By MS/MS		0	9.3	0	0	0	0	0	0	0	0	0	1	0	1
Specific	c162402/1/1445|m.67073	c162402/1/1445|m.67073	c162402/1/1445|m.67073	CHD4_MOUSE^CHD4_MOUSE^Q:155-517,H:397-500^27.049%ID^E:6.02e-11^RecName: Full=Chromodomain-helicase-DNA-binding protein 4;^Eukaryota; Metazoa; Chordata; Craniata; Vertebrata; Euteleostomi; Mammalia; Eutheria; Euarchontoglires; Glires; Rodentia; Sciurognathi; Muroidea; Muridae; Murinae; Mus; Mus`CHD4_MOUSE^CHD4_MOUSE^Q:54-140,H:361-389^41.379%ID^E:6.02e-11^RecName: Full=Chromodomain-helicase-DNA-bi…	1	1	1		1	1	1	1	1	0	0	1	0	0	1	0	0	16.8	16.8	16.8	15.237	137	137	0.011236	5.9596	By MS/MS			16.8	0	0	0	0	0	0	0	0	0	1	0	0	1
Specific	c205576/1/2032|m.80761	c205576/1/2032|m.80761	c205576/1/2032|m.80761	CIPKO_ARATH^CIPKO_ARATH^Q:5-444,H:6-446^75.057%ID^E:0^RecName: Full=CBL-interacting serine/threonine-protein kinase 24;^Eukaryota; Viridiplantae; Streptophyta; Embryophyta; Tracheophyta; Spermatophyta; Magnoliophyta; eudicotyledons; Gunneridae; Pentapetalae; rosids; malvids; Brassicales; Brassicaceae; Camelineae; Arabidopsis	1	1	1		1	1	1	1	1	0	0	1	0	0	1	0	0	1.6	1.6	1.6	50.108	444	444	0.0094787	5.9596	By MS/MS			1.6	0	0	3370600	3370600	0	0	13850000	0	0	1	0	0	1
Specific	c155795/1/2128|m.61901	c155795/1/2128|m.61901	c155795/1/2128|m.61901	CLH1_ORYSJ^CLH1_ORYSJ^Q:1-173,H:1206-1377^91.908%ID^E:8.67e-106^RecName: Full=Clathrin heavy chain 1;^Eukaryota; Viridiplantae; Streptophyta; Embryophyta; Tracheophyta; Spermatophyta; Magnoliophyta; Liliopsida; Poales; Poaceae; BEP clade; Ehrhartoideae; Oryzeae; Oryza	1	1	1		1	1	1	1	0	0	1	0	0	1	0	0	1	7	7	7	21.148	186	186	0.030769	6.076			By MS/MS	0	0	7	0	0	0	0	0	0	0	0	0	1	1
Specific	c159403/1/1643|m.64754	c159403/1/1643|m.64754	c159403/1/1643|m.64754	CP53_ASPNG^CP53_ASPNG^Q:66-284,H:32-253^71.171%ID^E:2.95e-114^RecName: Full=Benzoate 4-monooxygenase;^Eukaryota; Fungi; Dikarya; Ascomycota; Pezizomycotina; Eurotiomycetes; Eurotiomycetidae; Eurotiales; Aspergillaceae; Aspergillus	1	1	1		1	1	1	1	0	1	0	0	1	0	0	1	0	7.2	7.2	7.2	36.237	320	320	0.011834	5.9596		By MS/MS		0	7.2	0	0	0	0	0	0	0	0	0	1	0	1
Specific	c212739/1/1405|m.86367	c212739/1/1405|m.86367	c212739/1/1405|m.86367	CYSEP_PHAVU^CYSEP_PHAVU^Q:61-140,H:4-83^60%ID^E:1.4e-26^RecName: Full=Vignain;^Eukaryota; Viridiplantae; Streptophyta; Embryophyta; Tracheophyta; Spermatophyta; Magnoliophyta; eudicotyledons; Gunneridae; Pentapetalae; rosids; fabids; Fabales; Fabaceae; Papilionoideae; Phaseoleae; Phaseolus	1	1	1		1	1	1	1	0	0	1	0	0	1	0	0	1	16.3	16.3	16.3	16.797	141	141	0.0088496	5.9596			By MS/MS	0	0	16.3	0	0	0	0	0	0	0	0	0	2	2
Specific	c299759/1/2064|m.26021	c299759/1/2064|m.26021	c299759/1/2064|m.26021	DHAR2_ARATH^DHAR2_ARATH^Q:8-92,H:81-166^70.93%ID^E:3.51e-36^RecName: Full=Glutathione S-transferase DHAR2;^Eukaryota; Viridiplantae; Streptophyta; Embryophyta; Tracheophyta; Spermatophyta; Magnoliophyta; eudicotyledons; Gunneridae; Pentapetalae; rosids; malvids; Brassicales; Brassicaceae; Camelineae; Arabidopsis	1	1	1		1	1	1	1	1	1	1	1	1	1	1	1	1	6.9	6.9	6.9	11.05	102	102	0.007326	5.9596	By MS/MS	By matching	By matching	6.9	6.9	6.9	70149000	21090000	943720	48116000	0	0	102590000	1	0	0	1
Specific	c171417/1/1295|m.73954	c171417/1/1295|m.73954	c171417/1/1295|m.73954	DIOX2_PAPSO^DIOX2_PAPSO^Q:673-915,H:205-284^53.012%ID^E:3.65e-29^RecName: Full=Probable 2-oxoglutarate/Fe(II)-dependent dioxygenase;^Eukaryota; Viridiplantae; Streptophyta; Embryophyta; Tracheophyta; Spermatophyta; Magnoliophyta; eudicotyledons; Ranunculales; Papaveraceae; Papaveroideae; Papaver`DIOX2_PAPSO^DIOX2_PAPSO^Q:249-662,H:64-198^35.211%ID^E:3.65e-29^RecName: Full=Probable 2-oxoglutarate/…	1	1	1		1	1	1	1	1	0	0	1	0	0	1	0	0	22.3	22.3	22.3	11.876	103	103	0.025641	6.0021	By MS/MS			22.3	0	0	0	0	0	0	0	0	0	1	0	0	1
Specific	c66355/1/1849|m.35231	c66355/1/1849|m.35231	c66355/1/1849|m.35231	DJ1C_ARATH^DJ1C_ARATH^Q:59-464,H:65-471^61.179%ID^E:1.53e-179^RecName: Full=Protein DJ-1 homolog C;^Eukaryota; Viridiplantae; Streptophyta; Embryophyta; Tracheophyta; Spermatophyta; Magnoliophyta; eudicotyledons; Gunneridae; Pentapetalae; rosids; malvids; Brassicales; Brassicaceae; Camelineae; Arabidopsis	1	1	1		1	1	1	1	1	0	0	1	0	0	1	0	0	4.9	4.9	4.9	50.204	465	465	0.0065789	5.9596	By MS/MS			4.9	0	0	0	0	0	0	0	0	0	1	0	0	1
Specific	c170463/1/1803|m.73256	c170463/1/1803|m.73256	c170463/1/1803|m.73256	DRL4_ARATH^DRL4_ARATH^Q:1485-1802,H:416-522^43.925%ID^E:1.05e-48^RecName: Full=Putative disease resistance protein At1g50180;^Eukaryota; Viridiplantae; Streptophyta; Embryophyta; Tracheophyta; Spermatophyta; Magnoliophyta; eudicotyledons; Gunneridae; Pentapetalae; rosids; malvids; Brassicales; Brassicaceae; Camelineae; Arabidopsis`DRL4_ARATH^DRL4_ARATH^Q:286-957,H:4-232^26.744%ID^E:1.05e-48^RecNa…	1	1	1		1	1	1	1	1	0	0	1	0	0	1	0	0	17.6	17.6	17.6	14.75	131	131	0.010417	5.9596	By MS/MS			17.6	0	0	0	0	0	0	0	0	0	1	0	0	1
Specific	c249632/2/1509|m.94040	c249632/2/1509|m.94040	c249632/2/1509|m.94040	DRL4_ARATH^DRL4_ARATH^Q:2-409,H:4-421^32.009%ID^E:4.22e-60^RecName: Full=Putative disease resistance protein At1g50180;^Eukaryota; Viridiplantae; Streptophyta; Embryophyta; Tracheophyta; Spermatophyta; Magnoliophyta; eudicotyledons; Gunneridae; Pentapetalae; rosids; malvids; Brassicales; Brassicaceae; Camelineae; Arabidopsis	1	1	1		1	1	1	1	1	0	0	1	0	0	1	0	0	5.6	5.6	5.6	46.893	409	409	0.0084034	5.9596	By MS/MS			5.6	0	0	0	0	0	0	0	0	0	1	0	0	1
Specific	c8669/1/1595|m.8401	c8669/1/1595|m.8401	c8669/1/1595|m.8401	DRL9_ARATH^DRL9_ARATH^Q:1-79,H:274-351^35.443%ID^E:1.35e-07^RecName: Full=Probable disease resistance protein At1g58602;^Eukaryota; Viridiplantae; Streptophyta; Embryophyta; Tracheophyta; Spermatophyta; Magnoliophyta; eudicotyledons; Gunneridae; Pentapetalae; rosids; malvids; Brassicales; Brassicaceae; Camelineae; Arabidopsis	1	1	1		1	1	1	1	1	0	0	1	0	0	1	0	0	10.3	10.3	10.3	14.912	126	126	0.0062696	5.9596	By MS/MS			10.3	0	0	453300	453300	0	0	158230	0	0	1	0	0	1
Specific	c7927/2/1534|m.7661	c7927/2/1534|m.7661	c7927/2/1534|m.7661	DSP4_CASSA^DSP4_CASSA^Q:1-352,H:1-350^71.023%ID^E:2.71e-180^RecName: Full=Phosphoglucan phosphatase DSP4, amyloplastic {ECO:0000250|UniProtKB:Q9FEB5};^Eukaryota; Viridiplantae; Streptophyta; Embryophyta; Tracheophyta; Spermatophyta; Magnoliophyta; eudicotyledons; Gunneridae; Pentapetalae; rosids; fabids; Fagales; Fagaceae; Castanea	1	1	1		1	1	1	1	1	0	0	1	0	0	1	0	0	6.4	6.4	6.4	40.384	358	358	0.0062893	5.9596	By MS/MS			6.4	0	0	0	0	0	0	0	0	0	1	0	0	1
Specific	c301917/1/1897|m.27418	c301917/1/1897|m.27418	c301917/1/1897|m.27418	ELC_ARATH^ELC_ARATH^Q:12-414,H:6-396^59.113%ID^E:3.3e-162^RecName: Full=Protein ELC;^Eukaryota; Viridiplantae; Streptophyta; Embryophyta; Tracheophyta; Spermatophyta; Magnoliophyta; eudicotyledons; Gunneridae; Pentapetalae; rosids; malvids; Brassicales; Brassicaceae; Camelineae; Arabidopsis	1	1	1		1	1	1	1	1	0	0	1	0	0	1	0	0	3.1	3.1	3.1	47.01	419	419	0.0072464	5.9596	By MS/MS			3.1	0	0	1261200	1261200	0	0	440220	0	0	1	0	0	1
Specific	c199873/1/2169|m.76160	c199873/1/2169|m.76160	c199873/1/2169|m.76160	ETR2_ARATH^ETR2_ARATH^Q:1-584,H:1-590^59.076%ID^E:0^RecName: Full=Ethylene receptor 2;^Eukaryota; Viridiplantae; Streptophyta; Embryophyta; Tracheophyta; Spermatophyta; Magnoliophyta; eudicotyledons; Gunneridae; Pentapetalae; rosids; malvids; Brassicales; Brassicaceae; Camelineae; Arabidopsis	1	1	1		1	1	1	1	1	0	0	1	0	0	1	0	0	3.9	3.9	3.9	65.598	590	590	0.010101	5.9596	By MS/MS			3.9	0	0	0	0	0	0	0	0	0	1	0	0	1
Specific	c251948/1/1460|m.95806	c251948/1/1460|m.95806	c251948/1/1460|m.95806	FBL77_ARATH^FBL77_ARATH^Q:1-240,H:124-360^55%ID^E:3.52e-84^RecName: Full=F-box/LRR-repeat protein At4g29420;^Eukaryota; Viridiplantae; Streptophyta; Embryophyta; Tracheophyta; Spermatophyta; Magnoliophyta; eudicotyledons; Gunneridae; Pentapetalae; rosids; malvids; Brassicales; Brassicaceae; Camelineae; Arabidopsis	1	1	1		1	1	1	1	1	1	1	1	1	1	1	1	1	2.9	2.9	2.9	27.01	240	240	0.0081967	5.9596	By MS/MS	By matching	By matching	2.9	2.9	2.9	6350700	5047400	631550	671680	8110500	0	0	1	0	0	1
Specific	c160665/1/1710|m.65746	c160665/1/1710|m.65746	c160665/1/1710|m.65746	FES1_PHANO^FES1_PHANO^Q:4-132,H:2-125^32.593%ID^E:9.41e-07^RecName: Full=Hsp70 nucleotide exchange factor FES1;^Eukaryota; Fungi; Dikarya; Ascomycota; Pezizomycotina; Dothideomycetes; Pleosporomycetidae; Pleosporales; Pleosporineae; Phaeosphaeriaceae; Parastagonospora	1	1	1		1	1	1	1	0	1	0	0	1	0	0	1	0	15.5	15.5	15.5	16.565	148	148	0.011561	5.9596		By MS/MS		0	15.5	0	0	0	0	0	0	0	0	0	1	0	1
Specific	c35578/1/2067|m.24040	c35578/1/2067|m.24040	c35578/1/2067|m.24040	FGGY_XENLA^FGGY_XENLA^Q:1-112,H:114-210^48.246%ID^E:2.3e-27^RecName: Full=FGGY carbohydrate kinase domain-containing protein;^Eukaryota; Metazoa; Chordata; Craniata; Vertebrata; Euteleostomi; Amphibia; Batrachia; Anura; Pipoidea; Pipidae; Xenopodinae; Xenopus; Xenopus	1	1	1		1	1	1	1	1	0	1	1	0	1	1	0	1	11.2	11.2	11.2	13.537	116	116	0.0068966	5.9596	By MS/MS		By matching	11.2	0	11.2	22849000	2759300	0	20090000	0	0	6302300	1	0	0	1
Specific	c76487/1/1051|m.43371	c76487/1/1051|m.43371	c76487/1/1051|m.43371	FLA7_ARATH^FLA7_ARATH^Q:42-256,H:45-254^63.426%ID^E:4.86e-75^RecName: Full=Fasciclin-like arabinogalactan protein 7;^Eukaryota; Viridiplantae; Streptophyta; Embryophyta; Tracheophyta; Spermatophyta; Magnoliophyta; eudicotyledons; Gunneridae; Pentapetalae; rosids; malvids; Brassicales; Brassicaceae; Camelineae; Arabidopsis	1	1	1		1	1	1	1	1	1	0	1	1	0	1	1	0	3.5	3.5	3.5	27.314	256	256	0	79.392	By matching	By MS/MS		3.5	3.5	0	15027000	66066	14961000	0	0	4456900	0	0	3	0	3
Specific	c303321/1/1589|m.28170	c303321/1/1589|m.28170	c303321/1/1589|m.28170	GALK1_ARATH^GALK1_ARATH^Q:19-217,H:1-195^72.864%ID^E:1.18e-96^RecName: Full=Galactokinase;^Eukaryota; Viridiplantae; Streptophyta; Embryophyta; Tracheophyta; Spermatophyta; Magnoliophyta; eudicotyledons; Gunneridae; Pentapetalae; rosids; malvids; Brassicales; Brassicaceae; Camelineae; Arabidopsis	1	1	1		1	1	1	1	1	0	0	1	0	0	1	0	0	9.3	9.3	9.3	27.417	247	247	0.0071685	5.9596	By MS/MS			9.3	0	0	0	0	0	0	0	0	0	1	0	0	1
Specific	c215191/1/1370|m.88323	c215191/1/1370|m.88323	c215191/1/1370|m.88323	GATA1_ARATH^GATA1_ARATH^Q:658-852,H:181-246^62.121%ID^E:3.13e-16^RecName: Full=GATA transcription factor 1;^Eukaryota; Viridiplantae; Streptophyta; Embryophyta; Tracheophyta; Spermatophyta; Magnoliophyta; eudicotyledons; Gunneridae; Pentapetalae; rosids; malvids; Brassicales; Brassicaceae; Camelineae; Arabidopsis`GATA1_ARATH^GATA1_ARATH^Q:749-898,H:206-260^54.545%ID^E:1.26e-08^RecName: Full=GATA …	1	1	1		1	1	1	1	1	0	1	1	0	1	1	0	1	5.4	5.4	5.4	14.442	129	129	0.0088106	5.9596	By MS/MS		By matching	5.4	0	5.4	4056700	3154400	0	902340	8540800	0	0	1	0	0	1
Specific	c69011/1/1900|m.37214	c69011/1/1900|m.37214	c69011/1/1900|m.37214	GATB_RICCO^GATB_RICCO^Q:1-547,H:1-548^79.562%ID^E:0^RecName: Full=Glutamyl-tRNA(Gln) amidotransferase subunit B, chloroplastic/mitochondrial {ECO:0000255|HAMAP-Rule:MF_03147};^Eukaryota; Viridiplantae; Streptophyta; Embryophyta; Tracheophyta; Spermatophyta; Magnoliophyta; eudicotyledons; Gunneridae; Pentapetalae; rosids; fabids; Malpighiales; Euphorbiaceae; Acalyphoideae; Acalypheae; Ricinus	1	1	1		1	1	1	1	0	1	0	0	1	0	0	1	0	1.3	1.3	1.3	61.309	548	548	0.074074	11.058		By MS/MS		0	1.3	0	0	0	0	0	0	0	0	0	1	0	1
Specific	c162808/1/2353|m.67374	c162808/1/2353|m.67374	c162808/1/2353|m.67374	GAUT3_ARATH^GAUT3_ARATH^Q:455-2137,H:117-680^69.558%ID^E:0^RecName: Full=Probable galacturonosyltransferase 3;^Eukaryota; Viridiplantae; Streptophyta; Embryophyta; Tracheophyta; Spermatophyta; Magnoliophyta; eudicotyledons; Gunneridae; Pentapetalae; rosids; malvids; Brassicales; Brassicaceae; Camelineae; Arabidopsis	1	1	1		1	1	1	1	0	0	1	0	0	1	0	0	1	16	16	16	15.751	144	144	0.011173	5.9596			By MS/MS	0	0	16	0	0	0	0	0	0	0	0	0	1	1
Specific	c258264/1/1511|m.100523	c258264/1/1511|m.100523	c258264/1/1511|m.100523	GDI1_ARATH^GDI1_ARATH^Q:1-314,H:1-348^76.724%ID^E:0^RecName: Full=Guanosine nucleotide diphosphate dissociation inhibitor 1;^Eukaryota; Viridiplantae; Streptophyta; Embryophyta; Tracheophyta; Spermatophyta; Magnoliophyta; eudicotyledons; Gunneridae; Pentapetalae; rosids; malvids; Brassicales; Brassicaceae; Camelineae; Arabidopsis	1	1	1		1	1	1	1	0	0	1	0	0	1	0	0	1	2.1	2.1	2.1	37.509	332	332	0.019048	5.9596			By MS/MS	0	0	2.1	553940	0	0	553940	0	0	149930	0	0	1	1
Specific	c299188/1/1705|m.90283	c299188/1/1705|m.90283	c299188/1/1705|m.90283	GDT12_ARATH^GDT12_ARATH^Q:33-351,H:41-359^70.219%ID^E:4.31e-143^RecName: Full=GDT1-like protein 2, chloroplastic;^Eukaryota; Viridiplantae; Streptophyta; Embryophyta; Tracheophyta; Spermatophyta; Magnoliophyta; eudicotyledons; Gunneridae; Pentapetalae; rosids; malvids; Brassicales; Brassicaceae; Camelineae; Arabidopsis	1	1	1		1	1	1	1	1	0	0	1	0	0	1	0	0	6.6	6.6	6.6	37.836	351	351	0.0073529	5.9596	By MS/MS			6.6	0	0	0	0	0	0	0	0	0	1	0	0	1
Specific	c220084/6/1371|m.90091	c220084/6/1371|m.90091	c220084/6/1371|m.90091	GGR_ARATH^GGR_ARATH^Q:239-883,H:44-258^78.14%ID^E:2.46e-117^RecName: Full=Heterodimeric geranylgeranyl pyrophosphate synthase small subunit, chloroplastic;^Eukaryota; Viridiplantae; Streptophyta; Embryophyta; Tracheophyta; Spermatophyta; Magnoliophyta; eudicotyledons; Gunneridae; Pentapetalae; rosids; malvids; Brassicales; Brassicaceae; Camelineae; Arabidopsis	1	1	1		1	1	1	1	0	0	1	0	0	1	0	0	1	3.8	3.8	3.8	19.898	183	183	0.0086207	5.9596			By MS/MS	0	0	3.8	503970	0	0	503970	0	0	1265300	0	0	1	1
Specific	c168482/3/859|m.71694	c168482/3/859|m.71694	c168482/3/859|m.71694	GL24_ARATH^GL24_ARATH^Q:4-171,H:49-219^43.86%ID^E:4.46e-40^RecName: Full=Germin-like protein subfamily 2 member 4;^Eukaryota; Viridiplantae; Streptophyta; Embryophyta; Tracheophyta; Spermatophyta; Magnoliophyta; eudicotyledons; Gunneridae; Pentapetalae; rosids; malvids; Brassicales; Brassicaceae; Camelineae; Arabidopsis	1	1	1		1	1	1	1	0	0	1	0	0	1	0	0	1	10.7	10.7	10.7	23.999	214	214	0.010695	5.9596			By MS/MS	0	0	10.7	0	0	0	0	0	0	0	0	0	1	1
Specific	c216537/1/1266|m.89450	c216537/1/1266|m.89450	c216537/1/1266|m.89450	GPAA1_HUMAN^GPAA1_HUMAN^Q:72-323,H:297-375^47.059%ID^E:2.22e-13^RecName: Full=Glycosylphosphatidylinositol anchor attachment 1 protein;^Eukaryota; Metazoa; Chordata; Craniata; Vertebrata; Euteleostomi; Mammalia; Eutheria; Euarchontoglires; Primates; Haplorrhini; Catarrhini; Hominidae; Homo	1	1	1		1	1	1	1	1	0	0	1	0	0	1	0	0	18.3	18.3	18.3	13.887	126	126	0.008658	5.9596	By MS/MS			18.3	0	0	0	0	0	0	0	0	0	2	0	0	2
Specific	c250578/1/1445|m.94780	c250578/1/1445|m.94780	c250578/1/1445|m.94780	GTE9_ARATH^GTE9_ARATH^Q:1-481,H:139-601^47.835%ID^E:4.93e-119^RecName: Full=Transcription factor GTE9;^Eukaryota; Viridiplantae; Streptophyta; Embryophyta; Tracheophyta; Spermatophyta; Magnoliophyta; eudicotyledons; Gunneridae; Pentapetalae; rosids; malvids; Brassicales; Brassicaceae; Camelineae; Arabidopsis	1	1	1		1	1	1	1	0	0	1	0	0	1	0	0	1	4.8	4.8	4.8	53.564	481	481	0.0082988	5.9596			By MS/MS	0	0	4.8	0	0	0	0	0	0	0	0	0	1	1
Specific	c254910/1/1471|m.98078	c254910/1/1471|m.98078	c254910/1/1471|m.98078	GTOMC_ORYSJ^GTOMC_ORYSJ^Q:135-238,H:74-178^59.048%ID^E:1.87e-32^RecName: Full=Probable tocopherol O-methyltransferase, chloroplastic;^Eukaryota; Viridiplantae; Streptophyta; Embryophyta; Tracheophyta; Spermatophyta; Magnoliophyta; Liliopsida; Poales; Poaceae; BEP clade; Ehrhartoideae; Oryzeae; Oryza	1	1	1		1	1	1	1	0	1	1	0	1	1	0	1	1	4.7	4.7	4.7	32.544	298	298	0	24.752		By MS/MS	By MS/MS	0	4.7	4.7	21809000	0	4425300	17384000	0	0	4656500	0	2	2	4
Specific	c25433/1/1347|m.15831	c25433/1/1347|m.15831	c25433/1/1347|m.15831	GXM1_ARATH^GXM1_ARATH^Q:103-193,H:109-198^59.341%ID^E:3.2e-32^RecName: Full=Glucuronoxylan 4-O-methyltransferase 1;^Eukaryota; Viridiplantae; Streptophyta; Embryophyta; Tracheophyta; Spermatophyta; Magnoliophyta; eudicotyledons; Gunneridae; Pentapetalae; rosids; malvids; Brassicales; Brassicaceae; Camelineae; Arabidopsis	1	1	1		1	1	1	1	1	0	0	1	0	0	1	0	0	11.4	11.4	11.4	22.548	201	201	0.0080645	5.9596	By MS/MS			11.4	0	0	0	0	0	0	0	0	0	1	0	0	1
Specific	c200357/1/1302|m.76556	c200357/1/1302|m.76556	c200357/1/1302|m.76556	HHT1_ARATH^HHT1_ARATH^Q:35-236,H:29-228^37.931%ID^E:1e-35^RecName: Full=Omega-hydroxypalmitate O-feruloyl transferase;^Eukaryota; Viridiplantae; Streptophyta; Embryophyta; Tracheophyta; Spermatophyta; Magnoliophyta; eudicotyledons; Gunneridae; Pentapetalae; rosids; malvids; Brassicales; Brassicaceae; Camelineae; Arabidopsis	1	1	1		1	1	1	1	1	0	0	1	0	0	1	0	0	2.6	2.6	2.6	30.911	274	274	0.0099502	5.9596	By MS/MS			2.6	0	0	4000000	4000000	0	0	1396300	0	0	1	0	0	1
Specific	c6932/1/1462|m.6743	c6932/1/1462|m.6743	c6932/1/1462|m.6743	IAA9_ARATH^IAA9_ARATH^Q:10-363,H:5-335^52.661%ID^E:3.62e-112^RecName: Full=Auxin-responsive protein IAA9;^Eukaryota; Viridiplantae; Streptophyta; Embryophyta; Tracheophyta; Spermatophyta; Magnoliophyta; eudicotyledons; Gunneridae; Pentapetalae; rosids; malvids; Brassicales; Brassicaceae; Camelineae; Arabidopsis	1	1	1		1	1	1	1	1	0	1	1	0	1	1	0	1	4.9	4.9	4.9	39.904	366	366	0.0065359	5.9596	By MS/MS		By matching	4.9	0	4.9	28237000	10967000	0	17271000	0	0	5465300	1	0	0	1
Specific	c304783/1/900|m.28863	c304783/1/900|m.28863	c304783/1/900|m.28863	IF1A_ONOVI^IF1A_ONOVI^Q:1-145,H:1-145^92.466%ID^E:2.4e-88^RecName: Full=Eukaryotic translation initiation factor 1A;^Eukaryota; Viridiplantae; Streptophyta; Embryophyta; Tracheophyta; Spermatophyta; Magnoliophyta; eudicotyledons; Gunneridae; Pentapetalae; rosids; fabids; Fabales; Fabaceae; Papilionoideae; Hedysareae; Onobrychis	1	1	1		1	1	1	1	1	1	0	1	1	0	1	1	0	4.8	4.8	4.8	16.458	145	145	0.0071174	5.9596	By MS/MS	By matching		4.8	4.8	0	4460600	3394600	1066000	0	0	1426800	0	1	0	0	1
Specific	c160987/1/1333|m.66009	c160987/1/1333|m.66009	c160987/1/1333|m.66009	IN80D_DICDI^IN80D_DICDI^Q:186-251,H:529-590^39.394%ID^E:1.65e-09^RecName: Full=INO80 complex subunit D;^Eukaryota; Amoebozoa; Mycetozoa; Dictyosteliida; Dictyostelium	1	1	1		1	1	1	1	0	1	0	0	1	0	0	1	0	2.2	2.2	2.2	35.217	312	312	0.011494	5.9596		By MS/MS		0	2.2	0	477710	0	477710	0	0	217720	0	0	1	0	1
Specific	c301715/1/1793|m.27318	c301715/1/1793|m.27318	c301715/1/1793|m.27318	IQD31_ARATH^IQD31_ARATH^Q:8-331,H:256-587^40.87%ID^E:1.44e-40^RecName: Full=Protein IQ-DOMAIN 31;^Eukaryota; Viridiplantae; Streptophyta; Embryophyta; Tracheophyta; Spermatophyta; Magnoliophyta; eudicotyledons; Gunneridae; Pentapetalae; rosids; malvids; Brassicales; Brassicaceae; Camelineae; Arabidopsis	1	1	1		1	1	1	1	1	0	0	1	0	0	1	0	0	2.1	2.1	2.1	36.629	331	331	0.0072727	5.9596	By MS/MS			2.1	0	0	4493900	4493900	0	0	1568600	0	0	1	0	0	1
Specific	c4452/1/1630|m.4474	c4452/1/1630|m.4474	c4452/1/1630|m.4474	KING1_ARATH^KING1_ARATH^Q:28-194,H:135-301^64.072%ID^E:5.72e-67^RecName: Full=SNF1-related protein kinase regulatory subunit gamma-1;^Eukaryota; Viridiplantae; Streptophyta; Embryophyta; Tracheophyta; Spermatophyta; Magnoliophyta; eudicotyledons; Gunneridae; Pentapetalae; rosids; malvids; Brassicales; Brassicaceae; Camelineae; Arabidopsis	1	1	1		1	1	1	1	0	0	1	0	0	1	0	0	1	11.1	11.1	11.1	22.527	207	207	0.0067797	5.9596			By MS/MS	0	0	11.1	0	0	0	0	0	0	0	0	0	1	1
Specific	c164204/1/1676|m.68469	c164204/1/1676|m.68469	c164204/1/1676|m.68469	LDL3_ARATH^LDL3_ARATH^Q:108-366,H:1352-1628^55.036%ID^E:3.87e-86^RecName: Full=Lysine-specific histone demethylase 1 homolog 3;^Eukaryota; Viridiplantae; Streptophyta; Embryophyta; Tracheophyta; Spermatophyta; Magnoliophyta; eudicotyledons; Gunneridae; Pentapetalae; rosids; malvids; Brassicales; Brassicaceae; Camelineae; Arabidopsis	1	1	1		1	1	1	1	0	0	1	0	0	1	0	0	1	1.9	1.9	1.9	40.235	366	366	0.01105	5.9596			By MS/MS	0	0	1.9	1674200	0	0	1674200	0	0	5409000	0	0	1	1
Specific	c1979/7/1823|m.2241	c1979/7/1823|m.2241	c1979/7/1823|m.2241	LHT1_ARATH^LHT1_ARATH^Q:1-447,H:1-446^78.523%ID^E:0^RecName: Full=Lysine histidine transporter 1;^Eukaryota; Viridiplantae; Streptophyta; Embryophyta; Tracheophyta; Spermatophyta; Magnoliophyta; eudicotyledons; Gunneridae; Pentapetalae; rosids; malvids; Brassicales; Brassicaceae; Camelineae; Arabidopsis	1	1	1		1	1	1	1	0	0	1	0	0	1	0	0	1	1.6	1.6	1.6	49.916	447	447	0.030303	6.073			By MS/MS	0	0	1.6	36214000	0	0	36214000	0	0	40204000	0	0	1	1
Specific	c255572/1/1408|m.98596	c255572/1/1408|m.98596	c255572/1/1408|m.98596	LOX21_SOLTU^LOX21_SOLTU^Q:26-126,H:697-799^47.573%ID^E:8.16e-26^RecName: Full=Linoleate 13S-lipoxygenase 2-1, chloroplastic;^Eukaryota; Viridiplantae; Streptophyta; Embryophyta; Tracheophyta; Spermatophyta; Magnoliophyta; eudicotyledons; Gunneridae; Pentapetalae; asterids; lamiids; Solanales; Solanaceae; Solanoideae; Solaneae; Solanum	1	1	1		1	1	1	1	0	1	0	0	1	0	0	1	0	15.6	15.6	15.6	16.743	147	147	0.0079681	5.9596		By MS/MS		0	15.6	0	0	0	0	0	0	0	0	0	1	0	1
Specific	c36438/1/1631|m.24870	c36438/1/1631|m.24870	c36438/1/1631|m.24870	LRKS4_ARATH^LRKS4_ARATH^Q:1-363,H:254-621^63.859%ID^E:3.89e-161^RecName: Full=L-type lectin-domain containing receptor kinase S.4;^Eukaryota; Viridiplantae; Streptophyta; Embryophyta; Tracheophyta; Spermatophyta; Magnoliophyta; eudicotyledons; Gunneridae; Pentapetalae; rosids; malvids; Brassicales; Brassicaceae; Camelineae; Arabidopsis	1	1	1		1	1	1	1	0	1	0	0	1	0	0	1	0	2.1	2.1	2.1	42.457	376	376	0.023256	5.9745		By MS/MS		0	2.1	0	0	0	0	0	0	0	0	0	1	0	1
Specific	c201444/1/2081|m.77425	c201444/1/2081|m.77425	c201444/1/2081|m.77425	MATE2_ARATH^MATE2_ARATH^Q:43-479,H:21-451^61.659%ID^E:3.75e-171^RecName: Full=MATE efflux family protein 2, chloroplastic;^Eukaryota; Viridiplantae; Streptophyta; Embryophyta; Tracheophyta; Spermatophyta; Magnoliophyta; eudicotyledons; Gunneridae; Pentapetalae; rosids; malvids; Brassicales; Brassicaceae; Camelineae; Arabidopsis	1	1	1		1	1	1	1	1	0	0	1	0	0	1	0	0	4.7	4.7	4.7	52.265	490	490	0.0098522	5.9596	By MS/MS			4.7	0	0	0	0	0	0	0	0	0	1	0	0	1
Specific	c168436/1/1790|m.71646	c168436/1/1790|m.71646	c168436/1/1790|m.71646	MAX1_ARATH^MAX1_ARATH^Q:19-293,H:247-521^73.091%ID^E:8.81e-149^RecName: Full=Cytochrome P450 711A1;^Eukaryota; Viridiplantae; Streptophyta; Embryophyta; Tracheophyta; Spermatophyta; Magnoliophyta; eudicotyledons; Gunneridae; Pentapetalae; rosids; malvids; Brassicales; Brassicaceae; Camelineae; Arabidopsis	1	1	1		1	1	1	1	1	0	0	1	0	0	1	0	0	4.4	4.4	4.4	33.51	294	294	0.010753	5.9596	By MS/MS			4.4	0	0	412890	412890	0	0	144130	0	0	1	0	0	1
Specific	c208685/1/1408|m.83191	c208685/1/1408|m.83191	c208685/1/1408|m.83191	MD26B_ARATH^MD26B_ARATH^Q:285-374,H:218-247^60%ID^E:3.42e-07^RecName: Full=Probable mediator of RNA polymerase II transcription subunit 26b;^Eukaryota; Viridiplantae; Streptophyta; Embryophyta; Tracheophyta; Spermatophyta; Magnoliophyta; eudicotyledons; Gunneridae; Pentapetalae; rosids; malvids; Brassicales; Brassicaceae; Camelineae; Arabidopsis`MD26B_ARATH^MD26B_ARATH^Q:89-256,H:153-208^37.5%ID^…	1	1	1		1	1	1	1	0	1	0	0	1	0	0	1	0	3.9	3.9	3.9	19.831	178	178	0.0091743	5.9596		By MS/MS		0	3.9	0	2504900	0	2504900	0	0	1141600	0	0	1	0	1
Specific	c115951/1/2473|m.50815	c115951/1/2473|m.50815	c115951/1/2473|m.50815	MD37E_ARATH^MD37E_ARATH^Q:2-131,H:488-617^91.538%ID^E:4.58e-76^RecName: Full=Probable mediator of RNA polymerase II transcription subunit 37e;^Eukaryota; Viridiplantae; Streptophyta; Embryophyta; Tracheophyta; Spermatophyta; Magnoliophyta; eudicotyledons; Gunneridae; Pentapetalae; rosids; malvids; Brassicales; Brassicaceae; Camelineae; Arabidopsis	1	1	1		1	1	1	1	0	1	1	0	1	1	0	1	1	5.1	5.1	5.1	15.487	136	136	0.015873	5.9596		By matching	By MS/MS	0	5.1	5.1	9476100	0	813190	8662900	0	0	16828000	0	0	1	1
Specific	c252753/1/1391|m.96428	c252753/1/1391|m.96428	c252753/1/1391|m.96428	MFSD5_MOUSE^MFSD5_MOUSE^Q:62-409,H:6-124^42.857%ID^E:2.4e-23^RecName: Full=Molybdate-anion transporter;^Eukaryota; Metazoa; Chordata; Craniata; Vertebrata; Euteleostomi; Mammalia; Eutheria; Euarchontoglires; Glires; Rodentia; Sciurognathi; Muroidea; Muridae; Murinae; Mus; Mus`MFSD5_MOUSE^MFSD5_MOUSE^Q:429-509,H:132-158^51.852%ID^E:2.4e-23^RecName: Full=Molybdate-anion transporter;^Eukaryota; Meta…	1	1	1		1	1	1	1	1	0	0	1	0	0	1	0	0	16.5	16.5	16.5	15.692	139	139	0.0081633	5.9596	By MS/MS			16.5	0	0	0	0	0	0	0	0	0	1	0	0	1
Specific	c73680/1/1285|m.40912	c73680/1/1285|m.40912	c73680/1/1285|m.40912	MSL6_ARATH^MSL6_ARATH^Q:147-318,H:243-409^27.326%ID^E:7.4e-11^RecName: Full=Mechanosensitive ion channel protein 6;^Eukaryota; Viridiplantae; Streptophyta; Embryophyta; Tracheophyta; Spermatophyta; Magnoliophyta; eudicotyledons; Gunneridae; Pentapetalae; rosids; malvids; Brassicales; Brassicaceae; Camelineae; Arabidopsis	1	1	1		1	1	1	1	1	1	0	1	1	0	1	1	0	5.4	5.4	5.4	47.774	428	428	0.0063694	5.9596	By MS/MS	By MS/MS		5.4	5.4	0	0	0	0	0	0	0	0	1	1	0	2
Specific	c31414/2/1242|m.20475	c31414/2/1242|m.20475	c31414/2/1242|m.20475	MTEF3_MOUSE^MTEF3_MOUSE^Q:44-184,H:162-306^28.859%ID^E:2.88e-06^RecName: Full=Transcription termination factor 3, mitochondrial;^Eukaryota; Metazoa; Chordata; Craniata; Vertebrata; Euteleostomi; Mammalia; Eutheria; Euarchontoglires; Glires; Rodentia; Sciurognathi; Muroidea; Muridae; Murinae; Mus; Mus	1	1	1		1	1	1	1	0	0	1	0	0	1	0	0	1	11	11	11	23.085	209	209	0.0625	8.838			By MS/MS	0	0	11	0	0	0	0	0	0	0	0	0	1	1
Specific	c353884/1/1682|m.46426	c353884/1/1682|m.46426	c353884/1/1682|m.46426	NAC43_ARATH^NAC43_ARATH^Q:556-798,H:99-182^57.143%ID^E:2.91e-43^RecName: Full=NAC domain-containing protein 43;^Eukaryota; Viridiplantae; Streptophyta; Embryophyta; Tracheophyta; Spermatophyta; Magnoliophyta; eudicotyledons; Gunneridae; Pentapetalae; rosids; malvids; Brassicales; Brassicaceae; Camelineae; Arabidopsis`NAC43_ARATH^NAC43_ARATH^Q:413-520,H:51-86^94.444%ID^E:2.91e-43^RecName: Full=NAC…	1	1	1		1	1	1	1	1	1	1	1	1	1	1	1	1	4.1	4.1	4.1	18.973	170	170	0.0069204	5.9596	By matching	By matching	By MS/MS	4.1	4.1	4.1	10555000	2733000	2737600	5084400	0	0	9965500	0	0	1	1
Specific	c200156/1/1827|m.76379	c200156/1/1827|m.76379	c200156/1/1827|m.76379	NAT11_ARATH^NAT11_ARATH^Q:30-1454,H:223-676^35.451%ID^E:7.68e-32^RecName: Full=Nucleobase-ascorbate transporter 11;^Eukaryota; Viridiplantae; Streptophyta; Embryophyta; Tracheophyta; Spermatophyta; Magnoliophyta; eudicotyledons; Gunneridae; Pentapetalae; rosids; malvids; Brassicales; Brassicaceae; Camelineae; Arabidopsis`NAT11_ARATH^NAT11_ARATH^Q:479-1354,H:362-644^32.468%ID^E:9.15e-18^RecName: F…	1	1	1		1	1	1	1	1	0	0	1	0	0	1	0	0	18	18	18	14.382	128	128	0.01	5.9596	By MS/MS			18	0	0	0	0	0	0	0	0	0	1	0	0	1
Specific	c115978/1/2159|m.50841	c115978/1/2159|m.50841	c115978/1/2159|m.50841	NAT6_ARATH^NAT6_ARATH^Q:101-1618,H:17-516^28.155%ID^E:1.01e-23^RecName: Full=Nucleobase-ascorbate transporter 6;^Eukaryota; Viridiplantae; Streptophyta; Embryophyta; Tracheophyta; Spermatophyta; Magnoliophyta; eudicotyledons; Gunneridae; Pentapetalae; rosids; malvids; Brassicales; Brassicaceae; Camelineae; Arabidopsis`NAT6_ARATH^NAT6_ARATH^Q:409-1425,H:115-451^31.909%ID^E:1.65e-20^RecName: Full=N…	1	1	1		1	1	1	1	1	0	1	1	0	1	1	0	1	17.6	17.6	17.6	14.826	131	131	0.015748	5.9596	By MS/MS		By MS/MS	17.6	0	17.6	0	0	0	0	0	0	0	2	0	1	3
Specific	c125391/1/1614|m.57810	c125391/1/1614|m.57810	c125391/1/1614|m.57810	NCASE_ARATH^NCASE_ARATH^Q:1-164,H:323-487^71.856%ID^E:1.14e-80^RecName: Full=Neutral ceramidase;^Eukaryota; Viridiplantae; Streptophyta; Embryophyta; Tracheophyta; Spermatophyta; Magnoliophyta; eudicotyledons; Gunneridae; Pentapetalae; rosids; malvids; Brassicales; Brassicaceae; Camelineae; Arabidopsis	1	1	1		1	1	1	1	0	1	0	0	1	0	0	1	0	13.9	13.9	13.9	18.22	166	166	0.013514	5.9596		By MS/MS		0	13.9	0	0	0	0	0	0	0	0	0	1	0	1
Specific	c25508/1/1558|m.15912	c25508/1/1558|m.15912	c25508/1/1558|m.15912	NRDE2_MOUSE^NRDE2_MOUSE^Q:82-341,H:867-1160^25.249%ID^E:3.96e-19^RecName: Full=Protein NRDE2 homolog;^Eukaryota; Metazoa; Chordata; Craniata; Vertebrata; Euteleostomi; Mammalia; Eutheria; Euarchontoglires; Glires; Rodentia; Sciurognathi; Muroidea; Muridae; Murinae; Mus; Mus	1	1	1		1	1	1	1	0	1	0	0	1	0	0	1	0	3.4	3.4	3.4	43.949	383	383	0.0080321	5.9596		By MS/MS		0	3.4	0	5427400	0	5427400	0	0	2145400	0	0	1	0	1
Specific	c209296/1/2242|m.83675	c209296/1/2242|m.83675	c209296/1/2242|m.83675	NRPD2_ARATH^NRPD2_ARATH^Q:17-122,H:220-325^57.944%ID^E:2.25e-32^RecName: Full=DNA-directed RNA polymerases IV and V subunit 2;^Eukaryota; Viridiplantae; Streptophyta; Embryophyta; Tracheophyta; Spermatophyta; Magnoliophyta; eudicotyledons; Gunneridae; Pentapetalae; rosids; malvids; Brassicales; Brassicaceae; Camelineae; Arabidopsis	1	1	1		1	1	1	1	1	0	0	1	0	0	1	0	0	6.3	6.3	6.3	14.703	126	126	0.026316	6.0218	By MS/MS			6.3	0	0	0	0	0	0	0	0	0	1	0	0	1
Specific	c258598/1/1377|m.100816	c258598/1/1377|m.100816	c258598/1/1377|m.100816	OPT3_ARATH^OPT3_ARATH^Q:23-90,H:651-718^77.941%ID^E:3.81e-32^RecName: Full=Oligopeptide transporter 3;^Eukaryota; Viridiplantae; Streptophyta; Embryophyta; Tracheophyta; Spermatophyta; Magnoliophyta; eudicotyledons; Gunneridae; Pentapetalae; rosids; malvids; Brassicales; Brassicaceae; Camelineae; Arabidopsis	1	1	1		1	1	1	1	0	0	1	0	0	1	0	0	1	17.7	17.7	17.7	14.934	130	130	0.0077821	5.9596			By MS/MS	0	0	17.7	0	0	0	0	0	0	0	0	0	1	1
Specific	c75389/2/1386|m.42208	c75389/2/1386|m.42208	c75389/2/1386|m.42208	PABP4_ARATH^PABP4_ARATH^Q:79-262,H:477-662^60.825%ID^E:5.62e-58^RecName: Full=Polyadenylate-binding protein 4;^Eukaryota; Viridiplantae; Streptophyta; Embryophyta; Tracheophyta; Spermatophyta; Magnoliophyta; eudicotyledons; Gunneridae; Pentapetalae; rosids; malvids; Brassicales; Brassicaceae; Camelineae; Arabidopsis`PABP4_ARATH^PABP4_ARATH^Q:31-79,H:46-94^69.388%ID^E:1.88e-15^RecName: Full=Polyad…	1	1	1		1	1	1	1	0	0	1	0	0	1	0	0	1	3	3	3	28.252	264	264	0.071429	9.9794			By MS/MS	0	0	3	3036000	0	0	3036000	0	0	3314800	0	0	1	1
Specific	c263461/1/2050|m.7634	c263461/1/2050|m.7634	c263461/1/2050|m.7634	PAO_ARATH^PAO_ARATH^Q:1045-1809,H:281-537^75.097%ID^E:0^RecName: Full=Pheophorbide a oxygenase, chloroplastic;^Eukaryota; Viridiplantae; Streptophyta; Embryophyta; Tracheophyta; Spermatophyta; Magnoliophyta; eudicotyledons; Gunneridae; Pentapetalae; rosids; malvids; Brassicales; Brassicaceae; Camelineae; Arabidopsis`PAO_ARATH^PAO_ARATH^Q:434-1045,H:77-280^79.902%ID^E:0^RecName: Full=Pheophorbide …	1	1	1		1	1	1	1	0	1	0	0	1	0	0	1	0	15.1	15.1	15.1	17.206	152	152	0.0075758	5.9596		By MS/MS		0	15.1	0	0	0	0	0	0	0	0	0	1	0	1
Specific	c160068/1/1444|m.65285	c160068/1/1444|m.65285	c160068/1/1444|m.65285	PDAT1_ARATH^PDAT1_ARATH^Q:1-128,H:339-460^59.375%ID^E:2.94e-45^RecName: Full=Phospholipid:diacylglycerol acyltransferase 1;^Eukaryota; Viridiplantae; Streptophyta; Embryophyta; Tracheophyta; Spermatophyta; Magnoliophyta; eudicotyledons; Gunneridae; Pentapetalae; rosids; malvids; Brassicales; Brassicaceae; Camelineae; Arabidopsis	1	1	1		1	1	1	1	1	0	0	1	0	0	1	0	0	16.4	16.4	16.4	15.948	140	140	0.011765	5.9596	By MS/MS			16.4	0	0	0	0	0	0	0	0	0	1	0	0	1
Specific	c250397/1/2353|m.94650	c250397/1/2353|m.94650	c250397/1/2353|m.94650	PDAT1_ARATH^PDAT1_ARATH^Q:1-518,H:157-671^77.992%ID^E:0^RecName: Full=Phospholipid:diacylglycerol acyltransferase 1;^Eukaryota; Viridiplantae; Streptophyta; Embryophyta; Tracheophyta; Spermatophyta; Magnoliophyta; eudicotyledons; Gunneridae; Pentapetalae; rosids; malvids; Brassicales; Brassicaceae; Camelineae; Arabidopsis	1	1	1		1	1	1	1	1	0	0	1	0	0	1	0	0	4.4	4.4	4.4	57.131	518	518	0.0083682	5.9596	By MS/MS			4.4	0	0	0	0	0	0	0	0	0	1	0	0	1
Specific	c113297/1/925|m.48841	c113297/1/925|m.48841	c113297/1/925|m.48841	PDCB3_ARATH^PDCB3_ARATH^Q:13-190,H:1-178^43.243%ID^E:2.06e-34^RecName: Full=PLASMODESMATA CALLOSE-BINDING PROTEIN 3;^Eukaryota; Viridiplantae; Streptophyta; Embryophyta; Tracheophyta; Spermatophyta; Magnoliophyta; eudicotyledons; Gunneridae; Pentapetalae; rosids; malvids; Brassicales; Brassicaceae; Camelineae; Arabidopsis	1	1	1		1	1	1	1	0	0	1	0	0	1	0	0	1	6.6	6.6	6.6	20.367	197	197	0	306.62			By MS/MS	0	0	6.6	3245600	0	0	3245600	0	0	913920	0	0	5	5
Specific	c212750/1/1302|m.86376	c212750/1/1302|m.86376	c212750/1/1302|m.86376	PDV1_ARATH^PDV1_ARATH^Q:12-264,H:11-272^47.909%ID^E:6.29e-73^RecName: Full=Plastid division protein PDV1;^Eukaryota; Viridiplantae; Streptophyta; Embryophyta; Tracheophyta; Spermatophyta; Magnoliophyta; eudicotyledons; Gunneridae; Pentapetalae; rosids; malvids; Brassicales; Brassicaceae; Camelineae; Arabidopsis	1	1	1		1	1	1	1	0	1	1	0	1	1	0	1	1	2.7	2.7	2.7	29.976	264	264	0.025974	6.013		By matching	By MS/MS	0	2.7	2.7	2446200	0	392900	2053300	0	0	6634000	0	0	1	1
Specific	c214820/1/2401|m.88043	c214820/1/2401|m.88043	c214820/1/2401|m.88043	PHF3_HUMAN^PHF3_HUMAN^Q:346-468,H:958-1085^39.062%ID^E:4.16e-17^RecName: Full=PHD finger protein 3;^Eukaryota; Metazoa; Chordata; Craniata; Vertebrata; Euteleostomi; Mammalia; Eutheria; Euarchontoglires; Primates; Haplorrhini; Catarrhini; Hominidae; Homo	1	1	1		1	1	1	1	0	0	1	0	0	1	0	0	1	1.1	1.1	1.1	88.134	799	799	0.02439	5.9927			By MS/MS	0	0	1.1	60862000	0	0	60862000	0	0	16285000	0	0	1	1
Specific	c298157/1/1713|m.28148	c298157/1/1713|m.28148	c298157/1/1713|m.28148	PIP27_ARATH^PIP27_ARATH^Q:1-112,H:140-252^50.42%ID^E:5.15e-23^RecName: Full=Aquaporin PIP2-7;^Eukaryota; Viridiplantae; Streptophyta; Embryophyta; Tracheophyta; Spermatophyta; Magnoliophyta; eudicotyledons; Gunneridae; Pentapetalae; rosids; malvids; Brassicales; Brassicaceae; Camelineae; Arabidopsis	1	1	1		1	1	1	1	0	0	1	0	0	1	0	0	1	20.4	20.4	20.4	12.434	113	113	0.0074074	5.9596			By MS/MS	0	0	20.4	0	0	0	0	0	0	0	0	0	1	1
Specific	c126095/1/898|m.58338	c126095/1/898|m.58338	c126095/1/898|m.58338	PITH1_HUMAN^PITH1_HUMAN^Q:19-192,H:29-199^44.253%ID^E:6.9e-42^RecName: Full=PITH domain-containing protein 1;^Eukaryota; Metazoa; Chordata; Craniata; Vertebrata; Euteleostomi; Mammalia; Eutheria; Euarchontoglires; Primates; Haplorrhini; Catarrhini; Hominidae; Homo	1	1	1		1	1	1	1	1	0	0	1	0	0	1	0	0	11.2	11.2	11.2	22.903	205	205	0.013333	5.9596	By MS/MS			11.2	0	0	0	0	0	0	0	0	0	1	0	0	1
Specific	c33570/1/1704|m.22148	c33570/1/1704|m.22148	c33570/1/1704|m.22148	PLY15_ARATH^PLY15_ARATH^Q:608-1081,H:256-416^43.21%ID^E:2.84e-38^RecName: Full=Probable pectate lyase 15;^Eukaryota; Viridiplantae; Streptophyta; Embryophyta; Tracheophyta; Spermatophyta; Magnoliophyta; eudicotyledons; Gunneridae; Pentapetalae; rosids; malvids; Brassicales; Brassicaceae; Camelineae; Arabidopsis`PLY15_ARATH^PLY15_ARATH^Q:243-608,H:116-255^34.483%ID^E:2.84e-38^RecName: Full=Probabl…	1	1	1		1	1	1	1	0	1	0	0	1	0	0	1	0	23.8	23.8	23.8	10.202	101	101	0.058824	8.2765		By MS/MS		0	23.8	0	0	0	0	0	0	0	0	0	1	0	1
Specific	c207804/1/1774|m.82533	c207804/1/1774|m.82533	c207804/1/1774|m.82533	PNAA_PRUDU^PNAA_PRUDU^Q:1-146,H:405-545^58.904%ID^E:6.42e-44^RecName: Full=Peptide-N4-(N-acetyl-beta-glucosaminyl)asparagine amidase A;^Eukaryota; Viridiplantae; Streptophyta; Embryophyta; Tracheophyta; Spermatophyta; Magnoliophyta; eudicotyledons; Gunneridae; Pentapetalae; rosids; fabids; Rosales; Rosaceae; Maloideae; Amygdaleae; Prunus	1	1	1		1	1	1	1	0	1	0	0	1	0	0	1	0	12.4	12.4	12.4	20.149	185	185	0.0092166	5.9596		By MS/MS		0	12.4	0	0	0	0	0	0	0	0	0	1	0	1
Specific	c113243/1/2056|m.48801	c113243/1/2056|m.48801	c113243/1/2056|m.48801	PP185_ARATH^PP185_ARATH^Q:29-539,H:41-551^58.513%ID^E:0^RecName: Full=Pentatricopeptide repeat-containing protein At2g35030, mitochondrial;^Eukaryota; Viridiplantae; Streptophyta; Embryophyta; Tracheophyta; Spermatophyta; Magnoliophyta; eudicotyledons; Gunneridae; Pentapetalae; rosids; malvids; Brassicales; Brassicaceae; Camelineae; Arabidopsis`PP185_ARATH^PP185_ARATH^Q:27-337,H:164-451^29.938%ID…	1	1	1		1	1	1	1	0	0	1	0	0	1	0	0	1	1.5	1.5	1.5	61.087	545	545	0.025316	6.0012			By MS/MS	0	0	1.5	0	0	0	0	0	0	0	0	0	1	1
Specific	c26481/2/1501|m.16593	c26481/2/1501|m.16593	c26481/2/1501|m.16593	PPA1_ARATH^PPA1_ARATH^Q:1-214,H:175-388^77.103%ID^E:2.58e-118^RecName: Full=Probable inactive purple acid phosphatase 1;^Eukaryota; Viridiplantae; Streptophyta; Embryophyta; Tracheophyta; Spermatophyta; Magnoliophyta; eudicotyledons; Gunneridae; Pentapetalae; rosids; malvids; Brassicales; Brassicaceae; Camelineae; Arabidopsis	1	1	1		1	1	1	1	0	0	1	0	0	1	0	0	1	9.3	9.3	9.3	27.57	246	246	0.0075472	5.9596			By MS/MS	0	0	9.3	0	0	0	0	0	0	0	0	0	1	1
Specific	c2781/1/1466|m.2952	c2781/1/1466|m.2952	c2781/1/1466|m.2952	PPA2_ARATH^PPA2_ARATH^Q:2-137,H:297-433^59.124%ID^E:9.61e-47^RecName: Full=Probable inactive purple acid phosphatase 2;^Eukaryota; Viridiplantae; Streptophyta; Embryophyta; Tracheophyta; Spermatophyta; Magnoliophyta; eudicotyledons; Gunneridae; Pentapetalae; rosids; malvids; Brassicales; Brassicaceae; Camelineae; Arabidopsis	1	1	1		1	1	1	1	0	0	1	0	0	1	0	0	1	6.6	6.6	6.6	15.303	137	137	0	50.099			By MS/MS	0	0	6.6	6899100	0	0	6899100	0	0	15192000	0	0	2	2
Specific	c259491/1/1303|m.101489	c259491/1/1303|m.101489	c259491/1/1303|m.101489	RD22_ARATH^RD22_ARATH^Q:478-930,H:219-366^32.45%ID^E:6.54e-20^RecName: Full=Dehydration-responsive protein RD22;^Eukaryota; Viridiplantae; Streptophyta; Embryophyta; Tracheophyta; Spermatophyta; Magnoliophyta; eudicotyledons; Gunneridae; Pentapetalae; rosids; malvids; Brassicales; Brassicaceae; Camelineae; Arabidopsis`RD22_ARATH^RD22_ARATH^Q:354-476,H:175-219^40%ID^E:6.54e-20^RecName: Full=Dehydr…	1	1	1		1	1	1	1	1	1	1	1	1	1	1	1	1	14.6	14.6	14.6	18.015	158	158	0.0077519	5.9596	By MS/MS	By MS/MS	By MS/MS	14.6	14.6	14.6	0	0	0	0	0	0	0	2	1	1	4
Specific	c161278/1/1547|m.66230	c161278/1/1547|m.66230	c161278/1/1547|m.66230	RF4_ARATH^RF4_ARATH^Q:2-121,H:705-821^56.667%ID^E:3.15e-37^RecName: Full=Putative E3 ubiquitin-protein ligase RF4;^Eukaryota; Viridiplantae; Streptophyta; Embryophyta; Tracheophyta; Spermatophyta; Magnoliophyta; eudicotyledons; Gunneridae; Pentapetalae; rosids; malvids; Brassicales; Brassicaceae; Camelineae; Arabidopsis	1	1	1		1	1	1	1	0	0	1	0	0	1	0	0	1	18.9	18.9	18.9	13.976	122	122	0.011364	5.9596			By MS/MS	0	0	18.9	0	0	0	0	0	0	0	0	0	1	1
Specific	c166280/1/1230|m.69998	c166280/1/1230|m.69998	c166280/1/1230|m.69998	RK10_ARATH^RK10_ARATH^Q:12-207,H:17-198^42.929%ID^E:2.57e-43^RecName: Full=50S ribosomal protein L10, chloroplastic;^Eukaryota; Viridiplantae; Streptophyta; Embryophyta; Tracheophyta; Spermatophyta; Magnoliophyta; eudicotyledons; Gunneridae; Pentapetalae; rosids; malvids; Brassicales; Brassicaceae; Camelineae; Arabidopsis	1	1	1		1	1	1	1	1	0	0	1	0	0	1	0	0	10	10	10	24.85	229	229	0.01087	5.9596	By MS/MS			10	0	0	0	0	0	0	0	0	0	1	0	0	1
Specific	c246817/1/2354|m.92081	c246817/1/2354|m.92081	c246817/1/2354|m.92081	RLK1_ARATH^RLK1_ARATH^Q:1-371,H:116-487^38.071%ID^E:1.78e-68^RecName: Full=G-type lectin S-receptor-like serine/threonine-protein kinase RLK1;^Eukaryota; Viridiplantae; Streptophyta; Embryophyta; Tracheophyta; Spermatophyta; Magnoliophyta; eudicotyledons; Gunneridae; Pentapetalae; rosids; malvids; Brassicales; Brassicaceae; Camelineae; Arabidopsis	1	1	1		1	1	1	1	1	0	0	1	0	0	1	0	0	3.5	3.5	3.5	41.778	374	374	0.0084388	5.9596	By MS/MS			3.5	0	0	5921400	5921400	0	0	2894300	0	0	1	0	0	1
Specific	c211988/1/1744|m.85797	c211988/1/1744|m.85797	c211988/1/1744|m.85797	ROC3_ORYSJ^ROC3_ORYSJ^Q:186-758,H:529-718^47.343%ID^E:3.6e-54^RecName: Full=Homeobox-leucine zipper protein ROC3;^Eukaryota; Viridiplantae; Streptophyta; Embryophyta; Tracheophyta; Spermatophyta; Magnoliophyta; Liliopsida; Poales; Poaceae; BEP clade; Ehrhartoideae; Oryzeae; Oryza`ROC3_ORYSJ^ROC3_ORYSJ^Q:760-1086,H:719-836^38.983%ID^E:3.6e-54^RecName: Full=Homeobox-leucine zipper protein ROC3;^Euk…	1	1	1		1	1	1	1	1	0	0	1	0	0	1	0	0	18.4	18.4	18.4	12.084	125	125	0.009009	5.9596	By MS/MS			18.4	0	0	0	0	0	0	0	0	0	1	0	0	1
Specific	c76901/2/1509|m.43883	c76901/2/1509|m.43883	c76901/2/1509|m.43883	RP8L3_ARATH^RP8L3_ARATH^Q:7-91,H:4-87^36.471%ID^E:5.52e-10^RecName: Full=Disease resistance RPP8-like protein 3;^Eukaryota; Viridiplantae; Streptophyta; Embryophyta; Tracheophyta; Spermatophyta; Magnoliophyta; eudicotyledons; Gunneridae; Pentapetalae; rosids; malvids; Brassicales; Brassicaceae; Camelineae; Arabidopsis	1	1	1		1	1	1	1	0	1	0	0	1	0	0	1	0	7.3	7.3	7.3	12.411	109	109	0	75.163		By MS/MS		0	7.3	0	11184000	0	11184000	0	0	4445300	0	0	6	0	6
Specific	c69051/1/1629|m.37248	c69051/1/1629|m.37248	c69051/1/1629|m.37248	RPOC2_SPIOL^RPOC2_SPIOL^Q:3-317,H:202-515^89.206%ID^E:0^RecName: Full=DNA-directed RNA polymerase subunit beta'' {ECO:0000255|HAMAP-Rule:MF_01324};^Eukaryota; Viridiplantae; Streptophyta; Embryophyta; Tracheophyta; Spermatophyta; Magnoliophyta; eudicotyledons; Gunneridae; Pentapetalae; Caryophyllales; Amaranthaceae; Chenopodioideae; Anserineae; Spinacia	1	1	1		1	1	1	1	0	0	1	0	0	1	0	0	1	2.2	2.2	2.2	35.952	319	319	0.068966	9.7371			By MS/MS	0	0	2.2	14939000	0	0	14939000	0	0	32834000	0	0	1	1
Specific	c69618/1/1676|m.37689	c69618/1/1676|m.37689	c69618/1/1676|m.37689	RR17_ARATH^RR17_ARATH^Q:49-156,H:26-126^66.972%ID^E:1.5e-41^RecName: Full=30S ribosomal protein S17, chloroplastic;^Eukaryota; Viridiplantae; Streptophyta; Embryophyta; Tracheophyta; Spermatophyta; Magnoliophyta; eudicotyledons; Gunneridae; Pentapetalae; rosids; malvids; Brassicales; Brassicaceae; Camelineae; Arabidopsis	1	1	1		1	1	1	1	1	0	0	1	0	0	1	0	0	12.2	12.2	12.2	21.214	188	188	0.0065147	5.9596	By MS/MS			12.2	0	0	0	0	0	0	0	0	0	1	0	0	1
Specific	c257311/1/1297|m.99872	c257311/1/1297|m.99872	c257311/1/1297|m.99872	RTF1_SCHPO^RTF1_SCHPO^Q:103-388,H:80-336^25.26%ID^E:5.87e-13^RecName: Full=RNA polymerase-associated protein C651.09c;^Eukaryota; Fungi; Dikarya; Ascomycota; Taphrinomycotina; Schizosaccharomycetes; Schizosaccharomycetales; Schizosaccharomycetaceae; Schizosaccharomyces	1	1	1		1	1	1	1	1	0	1	1	0	1	1	0	1	3.6	3.6	3.6	44.081	389	389	0.0078125	5.9596	By MS/MS		By matching	3.6	0	3.6	7514000	842570	0	6671500	0	0	1491400	1	0	0	1
Specific	c128272/1/2026|m.59958	c128272/1/2026|m.59958	c128272/1/2026|m.59958	S38A1_HUMAN^S38A1_HUMAN^Q:14-211,H:180-385^33.962%ID^E:3.94e-18^RecName: Full=Sodium-coupled neutral amino acid transporter 1;^Eukaryota; Metazoa; Chordata; Craniata; Vertebrata; Euteleostomi; Mammalia; Eutheria; Euarchontoglires; Primates; Haplorrhini; Catarrhini; Hominidae; Homo	1	1	1		1	1	1	1	0	0	1	0	0	1	0	0	1	8.5	8.5	8.5	30.186	271	271	0.012987	5.9596			By MS/MS	0	0	8.5	0	0	0	0	0	0	0	0	0	1	1
Specific	c124664/2/1407|m.57282	c124664/2/1407|m.57282	c124664/2/1407|m.57282	SEPA_DICDI^SEPA_DICDI^Q:12-275,H:11-269^65.152%ID^E:6.67e-108^RecName: Full=Serine/threonine-protein kinase sepA {ECO:0000250|UniProtKB:Q5B4Z3};^Eukaryota; Amoebozoa; Mycetozoa; Dictyosteliida; Dictyostelium	1	1	1		1	1	1	1	0	1	0	0	1	0	0	1	0	5.5	5.5	5.5	45.834	417	417	0.013605	5.9596		By MS/MS		0	5.5	0	0	0	0	0	0	0	0	0	1	0	1
Specific	c161489/1/1977|m.66375	c161489/1/1977|m.66375	c161489/1/1977|m.66375	SKIP8_ARATH^SKIP8_ARATH^Q:86-229,H:8-158^69.536%ID^E:2.82e-71^RecName: Full=F-box protein SKIP8;^Eukaryota; Viridiplantae; Streptophyta; Embryophyta; Tracheophyta; Spermatophyta; Magnoliophyta; eudicotyledons; Gunneridae; Pentapetalae; rosids; malvids; Brassicales; Brassicaceae; Camelineae; Arabidopsis	1	1	1		1	1	1	1	1	0	0	1	0	0	1	0	0	9	9	9	28.233	255	255	0.011299	5.9596	By MS/MS			9	0	0	0	0	0	0	0	0	0	1	0	0	1
Specific	c29412/1/1781|m.18851	c29412/1/1781|m.18851	c29412/1/1781|m.18851	SYK_STAAW^SYK_STAAW^Q:734-1426,H:258-469^26.316%ID^E:8.65e-18^RecName: Full=Lysine--tRNA ligase {ECO:0000255|HAMAP-Rule:MF_00252};^Bacteria; Firmicutes; Bacilli; Bacillales; Staphylococcus`SYK_STAAW^SYK_STAAW^Q:411-707,H:144-247^35.577%ID^E:8.65e-18^RecName: Full=Lysine--tRNA ligase {ECO:0000255|HAMAP-Rule:MF_00252};^Bacteria; Firmicutes; Bacilli; Bacillales; Staphylococcus	1	1	1		1	1	1	1	1	0	0	1	0	0	1	0	0	21.7	21.7	21.7	11.9	106	106	0.0074627	5.9596	By MS/MS			21.7	0	0	0	0	0	0	0	0	0	1	0	0	1
Specific	c200063/1/1369|m.76306	c200063/1/1369|m.76306	c200063/1/1369|m.76306	TBA1_PEA^TBA1_PEA^Q:57-173,H:195-311^100%ID^E:2.64e-76^RecName: Full=Tubulin alpha-1 chain;^Eukaryota; Viridiplantae; Streptophyta; Embryophyta; Tracheophyta; Spermatophyta; Magnoliophyta; eudicotyledons; Gunneridae; Pentapetalae; rosids; fabids; Fabales; Fabaceae; Papilionoideae; Fabeae; Pisum	1	1	1		1	1	1	1	1	0	0	1	0	0	1	0	0	11.2	11.2	11.2	23.049	206	206	0.01005	5.9596	By MS/MS			11.2	0	0	0	0	0	0	0	0	0	2	0	0	2
Specific	c263108/1/1950|m.878	c263108/1/1950|m.878	c263108/1/1950|m.878	TBA4_GOSHI^TBA4_GOSHI^Q:1-400,H:36-435^93.017%ID^E:0^RecName: Full=Tubulin alpha-4 chain;^Eukaryota; Viridiplantae; Streptophyta; Embryophyta; Tracheophyta; Spermatophyta; Magnoliophyta; eudicotyledons; Gunneridae; Pentapetalae; rosids; malvids; Malvales; Malvaceae; Malvoideae; Gossypium	1	1	1		1	1	1	1	1	0	0	1	0	0	1	0	0	4.8	4.8	4.8	53.735	480	480	0.0076046	5.9596	By MS/MS			4.8	0	0	0	0	0	0	0	0	0	1	0	0	1
Specific	c6288/1/1516|m.6095	c6288/1/1516|m.6095	c6288/1/1516|m.6095	TBAD_PHYPO^TBAD_PHYPO^Q:22-114,H:98-194^40.816%ID^E:7.82e-09^RecName: Full=Tubulin alpha-1A chain;^Eukaryota; Amoebozoa; Mycetozoa; Myxogastria; Myxogastromycetidae; Physariida; Physaraceae; Physarum	1	1	1		1	1	1	1	1	0	0	1	0	0	1	0	0	13	13	13	19.737	177	177	0.006689	5.9596	By MS/MS			13	0	0	0	0	0	0	0	0	0	2	0	0	2
Specific	c247076/1/1546|m.92261	c247076/1/1546|m.92261	c247076/1/1546|m.92261	TBB_TETTH^TBB_TETTH^Q:17-459,H:1-443^96.388%ID^E:0^RecName: Full=Tubulin beta chain;^Eukaryota; Alveolata; Ciliophora; Intramacronucleata; Oligohymenophorea; Hymenostomatida; Tetrahymenina; Tetrahymenidae; Tetrahymena	1	1	1		1	1	1	1	1	0	0	1	0	0	1	0	0	2.6	2.6	2.6	51.528	460	460	0.076923	11.251	By MS/MS			2.6	0	0	0	0	0	0	0	0	0	1	0	0	1
Specific	c205613/1/1540|m.80795	c205613/1/1540|m.80795	c205613/1/1540|m.80795	TMK1_ARATH^TMK1_ARATH^Q:436-729,H:628-725^90.816%ID^E:1.78e-120^RecName: Full=Probable receptor protein kinase TMK1;^Eukaryota; Viridiplantae; Streptophyta; Embryophyta; Tracheophyta; Spermatophyta; Magnoliophyta; eudicotyledons; Gunneridae; Pentapetalae; rosids; malvids; Brassicales; Brassicaceae; Camelineae; Arabidopsis`TMK1_ARATH^TMK1_ARATH^Q:3-437,H:482-628^49.324%ID^E:1.78e-120^RecName: Full…	1	1	1		1	1	1	1	1	0	0	1	0	0	1	0	0	15.7	15.7	15.7	11.264	102	102	0.028986	6.0578	By MS/MS			15.7	0	0	16288000	16288000	0	0	8880500	0	0	1	0	0	1
Specific	c13320/1/1760|m.12471	c13320/1/1760|m.12471	c13320/1/1760|m.12471	TOXA_COCCA^TOXA_COCCA^Q:37-241,H:202-406^26.636%ID^E:2.13e-12^RecName: Full=Putative HC-toxin efflux carrier TOXA;^Eukaryota; Fungi; Dikarya; Ascomycota; Pezizomycotina; Dothideomycetes; Pleosporomycetidae; Pleosporales; Pleosporineae; Pleosporaceae; Bipolaris	1	1	1		1	1	1	1	1	0	0	1	0	0	1	0	0	5.5	5.5	5.5	46.115	420	420	0.012579	5.9596	By MS/MS			5.5	0	0	0	0	0	0	0	0	0	1	0	0	1
Specific	c168849/1/1657|m.71993	c168849/1/1657|m.71993	c168849/1/1657|m.71993	TT12_ARATH^TT12_ARATH^Q:1-315,H:178-493^48.418%ID^E:6.68e-93^RecName: Full=Protein TRANSPARENT TESTA 12;^Eukaryota; Viridiplantae; Streptophyta; Embryophyta; Tracheophyta; Spermatophyta; Magnoliophyta; eudicotyledons; Gunneridae; Pentapetalae; rosids; malvids; Brassicales; Brassicaceae; Camelineae; Arabidopsis	1	1	1		1	1	1	1	0	0	1	0	0	1	0	0	1	4.9	4.9	4.9	35.234	324	324	0.029412	6.0676			By MS/MS	0	0	4.9	0	0	0	0	0	0	0	0	0	1	1
Specific	c32211/1/1858|m.21061	c32211/1/1858|m.21061	c32211/1/1858|m.21061	UBI4P_NICSY^UBI4P_NICSY^Q:1077-1319,H:152-228^43.21%ID^E:1.66e-14^RecName: Full=Polyubiquitin;^Eukaryota; Viridiplantae; Streptophyta; Embryophyta; Tracheophyta; Spermatophyta; Magnoliophyta; eudicotyledons; Gunneridae; Pentapetalae; asterids; lamiids; Solanales; Solanaceae; Nicotianoideae; Nicotianeae; Nicotiana`UBI4P_NICSY^UBI4P_NICSY^Q:923-1078,H:98-151^40.741%ID^E:1.66e-14^RecName: Full=Polyu…	1	1	1		1	1	1	1	0	0	1	0	0	1	0	0	1	18.4	18.4	18.4	13.754	125	125	0.006993	5.9596			By MS/MS	0	0	18.4	0	0	0	0	0	0	0	0	0	1	1
Specific	c199790/2/1523|m.76089	c199790/2/1523|m.76089	c199790/2/1523|m.76089	UFOG5_MANES^UFOG5_MANES^Q:28-248,H:8-236^45.852%ID^E:1.02e-60^RecName: Full=Anthocyanidin 3-O-glucosyltransferase 5;^Eukaryota; Viridiplantae; Streptophyta; Embryophyta; Tracheophyta; Spermatophyta; Magnoliophyta; eudicotyledons; Gunneridae; Pentapetalae; rosids; fabids; Malpighiales; Euphorbiaceae; Crotonoideae; Manihoteae; Manihot	1	1	1		1	1	1	1	1	0	1	1	0	1	1	0	1	8.5	8.5	8.5	30.162	272	272	0.010152	5.9596	By MS/MS		By MS/MS	8.5	0	8.5	0	0	0	0	0	0	0	1	0	2	3
Specific	c203465/2/1716|m.79079	c203465/2/1716|m.79079	c203465/2/1716|m.79079	VPS4_ARATH^VPS4_ARATH^Q:14-179,H:178-342^87.952%ID^E:3.85e-102^RecName: Full=Protein SUPPRESSOR OF K(+) TRANSPORT GROWTH DEFECT 1 {ECO:0000303|PubMed:17468262};^Eukaryota; Viridiplantae; Streptophyta; Embryophyta; Tracheophyta; Spermatophyta; Magnoliophyta; eudicotyledons; Gunneridae; Pentapetalae; rosids; malvids; Brassicales; Brassicaceae; Camelineae; Arabidopsis	1	1	1		1	1	1	1	1	0	0	1	0	0	1	0	0	7.1	7.1	7.1	20.684	184	184	0.043478	6.9172	By MS/MS			7.1	0	0	0	0	0	0	0	0	0	1	0	0	1
Specific	c128389/1/1515|m.60052	c128389/1/1515|m.60052	c128389/1/1515|m.60052	VSR1_PEA^VSR1_PEA^Q:1-124,H:186-309^85.484%ID^E:6.75e-76^RecName: Full=Vacuolar-sorting receptor 1;^Eukaryota; Viridiplantae; Streptophyta; Embryophyta; Tracheophyta; Spermatophyta; Magnoliophyta; eudicotyledons; Gunneridae; Pentapetalae; rosids; fabids; Fabales; Fabaceae; Papilionoideae; Fabeae; Pisum	1	1	1		1	1	1	1	1	0	0	1	0	0	1	0	0	13.5	13.5	13.5	20.168	170	170	0.012903	5.9596	By MS/MS			13.5	0	0	0	0	0	0	0	0	0	1	0	0	1
Specific	c24473/3/1725|m.15030	c24473/3/1725|m.15030	c24473/3/1725|m.15030	WDR4_DICDI^WDR4_DICDI^Q:53-287,H:18-253^31.048%ID^E:1.16e-28^RecName: Full=tRNA (guanine-N(7)-)-methyltransferase non-catalytic subunit wdr4 {ECO:0000255|HAMAP-Rule:MF_03056};^Eukaryota; Amoebozoa; Mycetozoa; Dictyosteliida; Dictyostelium	1	1	1		1	1	1	1	0	0	1	0	0	1	0	0	1	1.7	1.7	1.7	46.048	424	424	0.0085106	5.9596			By MS/MS	0	0	1.7	95909000	0	0	95909000	0	0	182840000	0	0	1	1
Specific	c206828/2/1636|m.81753	c206828/2/1636|m.81753	c206828/2/1636|m.81753	WEB1_ARATH^WEB1_ARATH^Q:1-408,H:438-803^53.641%ID^E:5.45e-119^RecName: Full=Protein WEAK CHLOROPLAST MOVEMENT UNDER BLUE LIGHT 1;^Eukaryota; Viridiplantae; Streptophyta; Embryophyta; Tracheophyta; Spermatophyta; Magnoliophyta; eudicotyledons; Gunneridae; Pentapetalae; rosids; malvids; Brassicales; Brassicaceae; Camelineae; Arabidopsis	1	1	1		1	1	1	1	1	0	0	1	0	0	1	0	0	5.5	5.5	5.5	45.933	415	415	0.0093458	5.9596	By MS/MS			5.5	0	0	0	0	0	0	0	0	0	1	0	0	1
Specific	c302541/1/1491|m.27719	c302541/1/1491|m.27719	c302541/1/1491|m.27719	WTR17_ARATH^WTR17_ARATH^Q:7-87,H:279-359^46.914%ID^E:9.66e-20^RecName: Full=WAT1-related protein At3g18200;^Eukaryota; Viridiplantae; Streptophyta; Embryophyta; Tracheophyta; Spermatophyta; Magnoliophyta; eudicotyledons; Gunneridae; Pentapetalae; rosids; malvids; Brassicales; Brassicaceae; Camelineae; Arabidopsis	1	1	1		1	1	1	1	1	1	1	1	1	1	1	1	1	20	20	20	12.638	115	115	0.0071942	5.9596	By MS/MS	By MS/MS	By MS/MS	20	20	20	0	0	0	0	0	0	0	1	1	1	3
Specific	c195092/4/1498|m.75155	c195092/4/1498|m.75155	c195092/4/1498|m.75155	WTR18_ARATH^WTR18_ARATH^Q:5-106,H:244-360^44.444%ID^E:2.15e-24^RecName: Full=WAT1-related protein At3g28050;^Eukaryota; Viridiplantae; Streptophyta; Embryophyta; Tracheophyta; Spermatophyta; Magnoliophyta; eudicotyledons; Gunneridae; Pentapetalae; rosids; malvids; Brassicales; Brassicaceae; Camelineae; Arabidopsis	1	1	1		1	1	1	1	0	0	1	0	0	1	0	0	1	21.1	21.1	21.1	11.945	109	109	0.010256	5.9596			By MS/MS	0	0	21.1	0	0	0	0	0	0	0	0	0	1	1
Specific	c209767/1/1497|m.84063	c209767/1/1497|m.84063	c209767/1/1497|m.84063	XYLT2_PANTR^XYLT2_PANTR^Q:755-1033,H:373-463^36.559%ID^E:5.26e-17^RecName: Full=Xylosyltransferase 2;^Eukaryota; Metazoa; Chordata; Craniata; Vertebrata; Euteleostomi; Mammalia; Eutheria; Euarchontoglires; Primates; Haplorrhini; Catarrhini; Hominidae; Pan`XYLT2_PANTR^XYLT2_PANTR^Q:345-662,H:247-346^34.862%ID^E:5.26e-17^RecName: Full=Xylosyltransferase 2;^Eukaryota; Metazoa; Chordata; Craniata; Ve…	1	1	1		1	1	1	1	1	0	0	1	0	0	1	0	0	15.9	15.9	15.9	16.82	145	145	0.0090498	5.9596	By MS/MS			15.9	0	0	0	0	0	0	0	0	0	1	0	0	1
Specific	c171253/1/2234|m.73833	c171253/1/2234|m.73833	c171253/1/2234|m.73833	Y1491_ARATH^Y1491_ARATH^Q:1294-1608,H:302-410^40%ID^E:7.45e-15^RecName: Full=Uncharacterized protein At1g04910;^Eukaryota; Viridiplantae; Streptophyta; Embryophyta; Tracheophyta; Spermatophyta; Magnoliophyta; eudicotyledons; Gunneridae; Pentapetalae; rosids; malvids; Brassicales; Brassicaceae; Camelineae; Arabidopsis`Y1491_ARATH^Y1491_ARATH^Q:963-1145,H:205-261^42.623%ID^E:4.11e-06^RecName: Full=…	1	1	1		1	1	1	1	1	0	0	1	0	0	1	0	0	20.9	20.9	20.9	11.927	110	110	0.010363	5.9596	By MS/MS			20.9	0	0	0	0	0	0	0	0	0	2	0	0	2
Specific	c28229/1/1459|m.17945	c28229/1/1459|m.17945	c28229/1/1459|m.17945	Y1491_ARATH^Y1491_ARATH^Q:1-84,H:242-323^39.286%ID^E:2.61e-13^RecName: Full=Uncharacterized protein At1g04910;^Eukaryota; Viridiplantae; Streptophyta; Embryophyta; Tracheophyta; Spermatophyta; Magnoliophyta; eudicotyledons; Gunneridae; Pentapetalae; rosids; malvids; Brassicales; Brassicaceae; Camelineae; Arabidopsis	1	1	1		1	1	1	1	1	0	0	1	0	0	1	0	0	21.3	21.3	21.3	12.469	108	108	0.0074906	5.9596	By MS/MS			21.3	0	0	0	0	0	0	0	0	0	1	0	0	1
Specific	c260545/1/2103|m.102269	c260545/1/2103|m.102269	c260545/1/2103|m.102269	Y2251_ARCFU^Y2251_ARCFU^Q:15-229,H:25-222^25.581%ID^E:3.42e-12^RecName: Full=Protein AF_2251 {ECO:0000255|HAMAP-Rule:MF_00226};^Archaea; Euryarchaeota; Archaeoglobi; Archaeoglobales; Archaeoglobaceae; Archaeoglobus	1	1	1		1	1	1	1	0	0	1	0	0	1	0	0	1	9.7	9.7	9.7	26.379	237	237	0.0076628	5.9596			By MS/MS	0	0	9.7	0	0	0	0	0	0	0	0	0	1	1
Specific	c255145/1/2517|m.98287	c255145/1/2517|m.98287	c255145/1/2517|m.98287	Y3684_ARATH^Y3684_ARATH^Q:100-458,H:82-482^50.498%ID^E:8.2e-130^RecName: Full=Acyltransferase-like protein At3g26840, chloroplastic;^Eukaryota; Viridiplantae; Streptophyta; Embryophyta; Tracheophyta; Spermatophyta; Magnoliophyta; eudicotyledons; Gunneridae; Pentapetalae; rosids; malvids; Brassicales; Brassicaceae; Camelineae; Arabidopsis	1	1	1		1	1	1	1	0	1	0	0	1	0	0	1	0	4.2	4.2	4.2	61.6	550	550	0.008	5.9596		By MS/MS		0	4.2	0	0	0	0	0	0	0	0	0	1	0	1
Specific	c5059/1/1593|m.4968	c5059/1/1593|m.4968	c5059/1/1593|m.4968	YAI8_SCHPO^YAI8_SCHPO^Q:236-1534,H:1-389^42.263%ID^E:1.63e-108^RecName: Full=Uncharacterized protein C24B11.08c;^Eukaryota; Fungi; Dikarya; Ascomycota; Taphrinomycotina; Schizosaccharomycetes; Schizosaccharomycetales; Schizosaccharomycetaceae; Schizosaccharomyces	1	1	1		1	1	1	1	0	0	1	0	0	1	0	0	1	3	3	3	25.699	235	235	0.018868	5.9596			By MS/MS	0	0	3	11532000	0	0	11532000	0	0	3617600	0	0	1	1
Specific	c29476/1/1530|m.18898	c29476/1/1530|m.18898	c29476/1/1530|m.18898	YCF2_EUCGG^YCF2_EUCGG^Q:2-510,H:1350-1858^92.731%ID^E:0^RecName: Full=Protein Ycf2 {ECO:0000255|HAMAP-Rule:MF_01330};^Eukaryota; Viridiplantae; Streptophyta; Embryophyta; Tracheophyta; Spermatophyta; Magnoliophyta; eudicotyledons; Gunneridae; Pentapetalae; rosids; malvids; Myrtales; Myrtaceae; Eucalyptus	1	1	1		1	1	1	1	0	0	1	0	0	1	0	0	1	4.5	4.5	4.5	58.502	510	510	0.0074349	5.9596			By MS/MS	0	0	4.5	0	0	0	0	0	0	0	0	0	1	1
Specific	BAM28606.1	BAM28606.1	BAM28606.1	b-1,3-Glucanase (Hatano and Hamada, 2008)	1	1	1		1	1	1	1	0	0	1	0	0	1	0	0	1	2.4	2.4	2.4	36.251	340	340	0.023529	5.9771			By MS/MS	0	0	2.4	0	0	0	0	0	0	0	0	0	1	1
Specific	c113987/3/1238|m.49333	c113987/3/1238|m.49333	c113987/3/1238|m.49333	PEX7_ARATH^PEX7_ARATH^Q:1-109,H:186-294^72.477%ID^E:2.86e-53^RecName: Full=Peroxisome biogenesis protein 7;^Eukaryota; Viridiplantae; Streptophyta; Embryophyta; Tracheophyta; Spermatophyta; Magnoliophyta; eudicotyledons; Gunneridae; Pentapetalae; rosids; malvids; Brassicales; Brassicaceae; Camelineae; Arabidopsis	1	1	1		1	1	1	1	1	0	0	1	0	0	1	0	0	8	8	8	18.733	162	162	0.016393	5.9596	By MS/MS			8	0	0	277000	277000	0	0	96689	0	0	1	0	0	1
Specific	c117475/1/2361|m.51937	c117475/1/2361|m.51937	c117475/1/2361|m.51937	GLGB_ASPOR^GLGB_ASPOR^Q:75-199,H:415-539^84%ID^E:2.28e-72^RecName: Full=1,4-alpha-glucan-branching enzyme;^Eukaryota; Fungi; Dikarya; Ascomycota; Pezizomycotina; Eurotiomycetes; Eurotiomycetidae; Eurotiales; Aspergillaceae; Aspergillus	1	1	1		1	1	1	1	1	1	0	1	1	0	1	1	0	2.6	2.6	2.6	37.79	350	350	0.042553	6.8607	By MS/MS	By MS/MS		2.6	2.6	0	11427000	9297400	2129800	0	5833500	0	0	2	1	0	3
Specific	c11670/1/1354|m.11080	c11670/1/1354|m.11080	c11670/1/1354|m.11080	MTEF3_CHICK^MTEF3_CHICK^Q:2-186,H:142-358^26.126%ID^E:8.75e-06^RecName: Full=Transcription termination factor 3, mitochondrial;^Eukaryota; Metazoa; Chordata; Craniata; Vertebrata; Euteleostomi; Testudines + Archosauria group; Archosauria; Dinosauria; Saurischia; Theropoda; Coelurosauria; Aves; Neognathae; Galloanserae; Galliformes; Phasianidae; Phasianinae; Gallus	1	1	1		1	1	1	1	0	1	0	0	1	0	0	1	0	8.4	8.4	8.4	31.938	275	275	0.015267	5.9596		By MS/MS		0	8.4	0	0	0	0	0	0	0	0	0	1	0	1
Specific	c118148/2/1614|m.52456	c118148/2/1614|m.52456	c118148/2/1614|m.52456	B561O_ARATH^B561O_ARATH^Q:1-116,H:238-353^75.862%ID^E:6.97e-61^RecName: Full=Cytochrome b561 and DOMON domain-containing protein At4g12980;^Eukaryota; Viridiplantae; Streptophyta; Embryophyta; Tracheophyta; Spermatophyta; Magnoliophyta; eudicotyledons; Gunneridae; Pentapetalae; rosids; malvids; Brassicales; Brassicaceae; Camelineae; Arabidopsis	1	1	1		1	1	1	1	0	0	1	0	0	1	0	0	1	6.6	6.6	6.6	13.407	121	121	0.021739	5.9674			By MS/MS	0	0	6.6	0	0	0	0	0	0	0	0	0	1	1
Specific	c116367/1/2260|m.51134	c116367/1/2260|m.51134	c116367/1/2260|m.51134	.	1	1	1		1	1	1	1	1	0	0	1	0	0	1	0	0	15	15	15	16.853	153	153	0.015504	5.9596	By MS/MS			15	0	0	0	0	0	0	0	0	0	1	0	0	1
Specific	c11363/1/1600|m.10815	c11363/1/1600|m.10815	c11363/1/1600|m.10815	SRF3_ARATH^SRF3_ARATH^Q:83-406,H:443-765^76.543%ID^E:5.53e-175^RecName: Full=Protein STRUBBELIG-RECEPTOR FAMILY 3;^Eukaryota; Viridiplantae; Streptophyta; Embryophyta; Tracheophyta; Spermatophyta; Magnoliophyta; eudicotyledons; Gunneridae; Pentapetalae; rosids; malvids; Brassicales; Brassicaceae; Camelineae; Arabidopsis	1	1	1		1	1	1	1	1	0	0	1	0	0	1	0	0	5.5	5.5	5.5	45.866	416	416	0.016667	5.9596	By MS/MS			5.5	0	0	0	0	0	0	0	0	0	1	0	0	1
Specific	NrNep4	NrNep4	NrNep4	Nepenthesin-4, Lee at al. 2016	1	1	1		1	1	1	1	0	1	0	0	1	0	0	1	0	1.8	1.8	1.8	48.281	445	445	0	111.85		By MS/MS		0	1.8	0	29791000	0	29791000	0	0	14463000	0	0	7	0	7
Specific	c120205/1/1252|m.54001	c120205/1/1252|m.54001	c120205/1/1252|m.54001	HSPC4_RICFE^HSPC4_RICFE^Q:25-155,H:17-163^26.49%ID^E:1.65e-09^RecName: Full=Small heat shock protein C4;^Bacteria; Proteobacteria; Alphaproteobacteria; Rickettsiales; Rickettsiaceae; Rickettsieae; Rickettsia; spotted fever group	1	1	1		1	1	1	1	1	0	0	1	0	0	1	0	0	14.1	14.1	14.1	18.054	163	163	0.014286	5.9596	By MS/MS			14.1	0	0	0	0	0	0	0	0	0	1	0	0	1
Specific	NrPAP1	NrPAP1	NrPAP1	Purple acid phosphatase, Lee at al. 2016	1	1	1		1	1	1	1	1	1	1	1	1	1	1	1	1	1.1	1.1	1.1	70.628	640	640	0	152.5	By MS/MS	By matching	By matching	1.1	1.1	1.1	30352000	23413000	6795300	143230	12816000	0	0	15	0	0	15
Specific	c11979/2/1661|m.11344	c11979/2/1661|m.11344	c11979/2/1661|m.11344	MATE7_ARATH^MATE7_ARATH^Q:8-96,H:380-468^48.315%ID^E:8.54e-23^RecName: Full=MATE efflux family protein 7;^Eukaryota; Viridiplantae; Streptophyta; Embryophyta; Tracheophyta; Spermatophyta; Magnoliophyta; eudicotyledons; Gunneridae; Pentapetalae; rosids; malvids; Brassicales; Brassicaceae; Camelineae; Arabidopsis	1	1	1		1	1	1	1	1	0	0	1	0	0	1	0	0	22.5	22.5	22.5	10.89	102	102	0.014493	5.9596	By MS/MS			22.5	0	0	0	0	0	0	0	0	0	2	0	0	2
Specific	c117352/2/1124|m.51852	c117352/2/1124|m.51852	c117352/2/1124|m.51852	PX11C_ARATH^PX11C_ARATH^Q:12-77,H:52-117^77.273%ID^E:1.35e-26^RecName: Full=Peroxisomal membrane protein 11C;^Eukaryota; Viridiplantae; Streptophyta; Embryophyta; Tracheophyta; Spermatophyta; Magnoliophyta; eudicotyledons; Gunneridae; Pentapetalae; rosids; malvids; Brassicales; Brassicaceae; Camelineae; Arabidopsis	1	1	1		1	1	1	1	1	0	0	1	0	0	1	0	0	23.2	23.2	23.2	11.22	99	99	0.015038	5.9596	By MS/MS			23.2	0	0	0	0	0	0	0	0	0	1	0	0	1
Specific	c116380/2/2282|m.51142	c116380/2/2282|m.51142	c116380/2/2282|m.51142	ACOX1_ARATH^ACOX1_ARATH^Q:15-117,H:18-121^36.19%ID^E:1.78e-14^RecName: Full=Peroxisomal acyl-coenzyme A oxidase 1;^Eukaryota; Viridiplantae; Streptophyta; Embryophyta; Tracheophyta; Spermatophyta; Magnoliophyta; eudicotyledons; Gunneridae; Pentapetalae; rosids; malvids; Brassicales; Brassicaceae; Camelineae; Arabidopsis	1	1	1		1	1	1	1	0	0	1	0	0	1	0	0	1	6.5	6.5	6.5	13.855	123	123	0.025	6.0001			By MS/MS	0	0	6.5	0	0	0	0	0	0	0	0	0	1	1
Specific	c119980/1/1671|m.53860	c119980/1/1671|m.53860	c119980/1/1671|m.53860	Y5158_ARATH^Y5158_ARATH^Q:21-237,H:46-267^75.676%ID^E:2.77e-118^RecName: Full=Probable receptor-like protein kinase At5g15080;^Eukaryota; Viridiplantae; Streptophyta; Embryophyta; Tracheophyta; Spermatophyta; Magnoliophyta; eudicotyledons; Gunneridae; Pentapetalae; rosids; malvids; Brassicales; Brassicaceae; Camelineae; Arabidopsis	1	1	1		1	1	1	1	1	0	0	1	0	0	1	0	0	4.9	4.9	4.9	29.653	265	265	0.014388	5.9596	By MS/MS			4.9	0	0	9685100	9685100	0	0	4733900	0	0	1	0	0	1
Specific	c116997/1/1399|m.51566	c116997/1/1399|m.51566	c116997/1/1399|m.51566	RFC1_ARATH^RFC1_ARATH^Q:1-341,H:619-956^62.717%ID^E:1.56e-137^RecName: Full=Replication factor C subunit 1;^Eukaryota; Viridiplantae; Streptophyta; Embryophyta; Tracheophyta; Spermatophyta; Magnoliophyta; eudicotyledons; Gunneridae; Pentapetalae; rosids; malvids; Brassicales; Brassicaceae; Camelineae; Arabidopsis	1	1	1		1	1	1	1	0	0	1	0	0	1	0	0	1	2.6	2.6	2.6	37.396	341	341	0.019802	5.9612			By MS/MS	0	0	2.6	2746800	0	0	2746800	0	0	614030	0	0	1	1
Specific	c111582/1/1727|m.47644	c111582/1/1727|m.47644	c111582/1/1727|m.47644	.	1	1	1		1	1	1	1	1	0	0	1	0	0	1	0	0	17.7	17.7	17.7	14.945	130	130	0.017544	5.9596	By MS/MS			17.7	0	0	0	0	0	0	0	0	0	1	0	0	1
Specific	c112481/1/1693|m.48262	c112481/1/1693|m.48262	c112481/1/1693|m.48262	.	1	1	1		1	1	1	1	1	0	1	1	0	1	1	0	1	11.2	11.2	11.2	23.158	205	205	0.017094	5.9596	By MS/MS		By MS/MS	11.2	0	11.2	0	0	0	0	0	0	0	3	0	1	4
Specific	c117697/1/1664|m.52097	c117697/1/1664|m.52097	c117697/1/1664|m.52097	.	1	1	1		1	1	1	1	1	0	1	1	0	1	1	0	1	5.2	5.2	5.2	15.606	134	134	0.014815	5.9596	By matching		By MS/MS	5.2	0	5.2	17565000	7864700	0	9700700	0	0	19794000	0	0	1	1
Specific	c126843/1/1256|m.58955	c126843/1/1256|m.58955	c126843/1/1256|m.58955	.	1	1	1		1	1	1	1	1	0	0	1	0	0	1	0	0	23	23	23	11.072	100	100	0.013158	5.9596	By MS/MS			23	0	0	0	0	0	0	0	0	0	1	0	0	1
Specific	c14144/1/1638|m.13180	c14144/1/1638|m.13180	c14144/1/1638|m.13180	.	1	1	1		1	1	1	1	1	0	1	1	0	1	1	0	1	4.4	4.4	4.4	18.218	160	160	0.0125	5.9596	By MS/MS		By matching	4.4	0	4.4	43591000	32276000	0	11315000	50283000	0	0	1	0	0	1
Specific	c1430/2/1422|m.1482	c1430/2/1422|m.1482	c1430/2/1422|m.1482	.	1	1	1		1	1	1	1	1	0	1	1	0	1	1	0	1	16.9	16.9	16.9	15.945	136	136	0.012422	5.9596	By MS/MS		By MS/MS	16.9	0	16.9	0	0	0	0	0	0	0	1	0	1	2
Specific	c1519/3/1565|m.1585	c1519/3/1565|m.1585	c1519/3/1565|m.1585	.	1	1	1		1	1	1	1	1	0	0	1	0	0	1	0	0	7	7	7	11.904	100	100	0.012195	5.9596	By MS/MS			7	0	0	1375800	1375800	0	0	480250	0	0	1	0	0	1
Specific	c163951/1/1640|m.68260	c163951/1/1640|m.68260	c163951/1/1640|m.68260	.	1	1	1		1	1	1	1	1	0	0	1	0	0	1	0	0	11.8	11.8	11.8	17.553	153	153	0.011111	5.9596	By MS/MS			11.8	0	0	2046700	2046700	0	0	714440	0	0	1	0	0	1
Specific	c166120/1/1262|m.69867	c166120/1/1262|m.69867	c166120/1/1262|m.69867	.	1	1	1		1	1	1	1	1	0	1	1	0	1	1	0	1	16.8	16.8	16.8	12.45	107	107	0.010929	5.9596	By MS/MS		By matching	16.8	0	16.8	16741000	11693000	0	5047700	4719000	0	0	2	0	0	2
Specific	c199653/6/1384|m.75917	c199653/6/1384|m.75917	c199653/6/1384|m.75917	. PREDICTED: transcription termination factor MTERF6, chloroplastic/mitochondrial [Beta vulgaris subsp. vulgaris]^2e-86^73%^XP_010690592.1	1	1	1		1	1	1	1	1	0	1	1	0	1	1	0	1	7.8	7.8	7.8	18.981	167	167	0.022727	5.9729	By MS/MS		By MS/MS	7.8	0	7.8	24083000	12652000	0	11430000	0	0	3585800	1	0	1	2
Specific	c203053/1/2262|m.78759	c203053/1/2262|m.78759	c203053/1/2262|m.78759	.	1	1	1		1	1	1	1	1	0	0	1	0	0	1	0	0	3.8	3.8	3.8	68.107	601	601	0.0098039	5.9596	By MS/MS			3.8	0	0	0	0	0	0	0	0	0	1	0	0	1
Specific	c203296/1/1407|m.78967	c203296/1/1407|m.78967	c203296/1/1407|m.78967	.	1	1	1		1	1	1	1	0	1	0	0	1	0	0	1	0	4.2	4.2	4.2	34.268	306	306	0.0097561	5.9596		By MS/MS		0	4.2	0	1765500	0	1765500	0	0	659460	0	0	1	0	1
Specific	c203306/1/2280|m.78973	c203306/1/2280|m.78973	c203306/1/2280|m.78973	.	1	1	1		1	1	1	1	1	0	0	1	0	0	1	0	0	3.9	3.9	3.9	62.867	587	587	0.0097087	5.9596	By MS/MS			3.9	0	0	0	0	0	0	0	0	0	1	0	0	1
Specific	c203471/1/1949|m.79084	c203471/1/1949|m.79084	c203471/1/1949|m.79084	.	1	1	1		1	1	1	1	1	0	0	1	0	0	1	0	0	4.4	4.4	4.4	36.4	321	321	0.0096618	5.9596	By MS/MS			4.4	0	0	1731100	1731100	0	0	1060500	0	0	1	0	0	1
Specific	c206198/1/1970|m.81253	c206198/1/1970|m.81253	c206198/1/1970|m.81253	.	1	1	1		1	1	1	1	1	0	0	1	0	0	1	0	0	16	16	16	15.849	144	144	0.009434	5.9596	By MS/MS			16	0	0	0	0	0	0	0	0	0	1	0	0	1
Specific	c209704/1/1431|m.84016	c209704/1/1431|m.84016	c209704/1/1431|m.84016	.	1	1	1		1	1	1	1	1	0	0	1	0	0	1	0	0	11.3	11.3	11.3	14.015	124	124	0.0090909	5.9596	By MS/MS			11.3	0	0	4837500	4837500	0	0	1688600	0	0	1	0	0	1
Specific	c212146/1/1841|m.85900	c212146/1/1841|m.85900	c212146/1/1841|m.85900	.	1	1	1		1	1	1	1	1	0	0	1	0	0	1	0	0	4.2	4.2	4.2	18.815	167	167	0.0089286	5.9596	By MS/MS			4.2	0	0	7915400	7915400	0	0	3868900	0	0	1	0	0	1
Specific	c215737/1/1760|m.88764	c215737/1/1760|m.88764	c215737/1/1760|m.88764	.	1	1	1		1	1	1	1	0	1	0	0	1	0	0	1	0	4	4	4	20.873	176	176	0.0087336	5.9596		By MS/MS		0	4	0	341120	0	341120	0	0	155470	0	0	1	0	1
Specific	c216408/1/1807|m.89313	c216408/1/1807|m.89313	c216408/1/1807|m.89313	.	1	1	1		1	1	1	1	1	0	1	1	0	1	1	0	1	10.7	10.7	10.7	13.88	121	121	0.0086957	5.9596	By MS/MS		By matching	10.7	0	10.7	10844000	5425700	0	5418300	2037800	0	0	1	0	0	1
Specific	c24334/2/1752|m.14860	c24334/2/1752|m.14860	c24334/2/1752|m.14860	.	1	1	1		1	1	1	1	1	0	0	1	0	0	1	0	0	6	6	6	13.048	116	116	0.008547	5.9596	By MS/MS			6	0	0	709420	709420	0	0	247630	0	0	1	0	0	1
Specific	c250405/1/988|m.94657	c250405/1/988|m.94657	c250405/1/988|m.94657	.	1	1	1		1	1	1	1	1	0	1	1	0	1	1	0	1	10.2	10.2	10.2	15.738	137	137	0.0083333	5.9596	By MS/MS		By matching	10.2	0	10.2	18380000	13939000	0	4440400	0	0	992640	1	0	0	1
Specific	c25612/2/962|m.15992	c25612/2/962|m.15992	c25612/2/962|m.15992	.	1	1	1		1	1	1	1	1	0	1	1	0	1	1	0	1	5.8	5.8	5.8	14.373	121	121	0.0079365	5.9596	By MS/MS		By matching	5.8	0	5.8	31180000	25816000	0	5363600	48605000	0	0	1	0	0	1
Specific	c256301/1/1351|m.99124	c256301/1/1351|m.99124	c256301/1/1351|m.99124	.	1	1	1		1	1	1	1	1	1	1	1	1	1	1	1	1	6.7	6.7	6.7	11.177	104	104	0.0079051	5.9596	By matching	By matching	By MS/MS	6.7	6.7	6.7	31091000	13404000	4108500	13578000	27581000	0	0	0	0	1	1
Specific	c261211/1/1628|m.102777	c261211/1/1628|m.102777	c261211/1/1628|m.102777	.	1	1	1		1	1	1	1	0	1	0	0	1	0	0	1	0	22.1	22.1	22.1	11.782	104	104	0.0076336	5.9596		By MS/MS		0	22.1	0	0	0	0	0	0	0	0	0	1	0	1
Specific	c298879/1/1801|m.90116	c298879/1/1801|m.90116	c298879/1/1801|m.90116	.	1	1	1		1	1	1	1	0	0	1	0	0	1	0	0	1	14.2	14.2	14.2	11.355	106	106	0.052632	7.1886			By MS/MS	0	0	14.2	0	0	0	0	0	0	0	0	0	1	1
Specific	c300424/1/1392|m.90835	c300424/1/1392|m.90835	c300424/1/1392|m.90835	.	1	1	1		1	1	1	1	1	0	0	1	0	0	1	0	0	7.7	7.7	7.7	33.686	298	298	0.0072993	5.9596	By MS/MS			7.7	0	0	0	0	0	0	0	0	0	1	0	0	1
Specific	c32807/1/6339|m.21527	c32807/1/6339|m.21527	c32807/1/6339|m.21527	.	1	1	1		1	1	1	1	0	1	0	0	1	0	0	1	0	11.8	11.8	11.8	11.895	110	110	0.0069686	5.9596		By MS/MS		0	11.8	0	155660	0	155660	0	0	70942	0	0	1	0	1
Specific	c34994/1/11881|m.23473	c34994/1/11881|m.23473	c34994/1/11881|m.23473	.	1	1	1		1	1	1	1	0	1	0	0	1	0	0	1	0	5.5	5.5	5.5	15.768	146	146	0.033898	6.1822		By MS/MS		0	5.5	0	19737000	0	19737000	0	0	6257200	0	0	1	0	1
Specific	c37243/1/1476|m.25680	c37243/1/1476|m.25680	c37243/1/1476|m.25680	.	1	1	1		1	1	1	1	1	1	0	1	1	0	1	1	0	5.6	5.6	5.6	13.817	124	124	0.0068729	5.9596	By matching	By MS/MS		5.6	5.6	0	3117800	999380	2118400	0	0	965470	0	0	1	0	1
Specific	c4189/1/1855|m.4204	c4189/1/1855|m.4204	c4189/1/1855|m.4204	.	1	1	1		1	1	1	1	0	1	1	0	1	1	0	1	1	1.3	1.3	1.3	61.824	546	546	0.0068027	5.9596		By matching	By MS/MS	0	1.3	1.3	4858400	0	812110	4046200	0	0	8723800	0	0	1	1
Specific	c5710/1/1616|m.5600	c5710/1/1616|m.5600	c5710/1/1616|m.5600	.	1	1	1		1	1	1	1	1	0	0	1	0	0	1	0	0	21.7	21.7	21.7	12.174	106	106	0.006734	5.9596	By MS/MS			21.7	0	0	0	0	0	0	0	0	0	1	0	0	1
Specific	c62753/1/1638|m.32500	c62753/1/1638|m.32500	c62753/1/1638|m.32500	.	1	1	1		1	1	1	1	1	1	1	1	1	1	1	1	1	2.2	2.2	2.2	34.399	313	313	0.0067114	5.9596	By matching	By matching	By MS/MS	2.2	2.2	2.2	10107000	7620200	163930	2322600	0	0	4955100	0	0	1	1
Specific	c62956/1/2504|m.32636	c62956/1/2504|m.32636	c62956/1/2504|m.32636	.	1	1	1		1	1	1	1	0	1	0	0	1	0	0	1	0	9	9	9	16.798	144	144	0.0066667	5.9596		By MS/MS		0	9	0	15387000	0	15387000	0	0	7012400	0	0	1	0	1
Specific	c64453/1/2189|m.33743	c64453/1/2189|m.33743	c64453/1/2189|m.33743	.	1	1	1		1	1	1	1	0	1	0	0	1	0	0	1	0	10	10	10	14.003	130	130	0.0066445	5.9596		By MS/MS		0	10	0	4801000	0	4801000	0	0	2825900	0	0	1	0	1
Specific	c65131/1/1496|m.34269	c65131/1/1496|m.34269	c65131/1/1496|m.34269	.	1	1	1		1	1	1	1	1	0	0	1	0	0	1	0	0	9	9	9	29.495	256	256	0.0066225	5.9596	By MS/MS			9	0	0	0	0	0	0	0	0	0	1	0	0	1
Specific	c66076/1/1308|m.35021	c66076/1/1308|m.35021	c66076/1/1308|m.35021	.	1	1	1		1	1	1	1	1	0	1	1	0	1	1	0	1	2.6	2.6	2.6	29.341	265	265	0.0066007	5.9596	By matching		By MS/MS	2.6	0	2.6	8708500	2486600	0	6221900	0	0	9756300	0	0	1	1
Specific	c68609/1/1308|m.36893	c68609/1/1308|m.36893	c68609/1/1308|m.36893	.	1	1	1		1	1	1	1	1	0	1	1	0	1	1	0	1	11.5	11.5	11.5	12.707	113	113	0.022222	5.9729	By MS/MS		By matching	11.5	0	11.5	20098000	4404600	0	15693000	0	0	4923000	1	0	0	1
Specific	c70983/3/2279|m.38734	c70983/3/2279|m.38734	c70983/3/2279|m.38734	.	1	1	1		1	1	1	1	1	0	1	1	0	1	1	0	1	14	14	14	14.818	129	129	0.0064935	5.9596	By MS/MS		By matching	14	0	14	15350000	8401900	0	6948600	0	0	2227700	1	0	0	1
Specific	c71795/1/1797|m.39423	c71795/1/1797|m.39423	c71795/1/1797|m.39423	.	1	1	1		1	1	1	1	1	0	0	1	0	0	1	0	0	6.1	6.1	6.1	43.079	374	374	0.0064725	5.9596	By MS/MS			6.1	0	0	0	0	0	0	0	0	0	1	0	0	1
Specific	c72164/1/1376|m.39733	c72164/1/1376|m.39733	c72164/1/1376|m.39733	.	1	1	1		1	1	1	1	0	0	1	0	0	1	0	0	1	16.9	16.9	16.9	15.607	136	136	0.0064309	5.9596			By MS/MS	0	0	16.9	0	0	0	0	0	0	0	0	0	1	1
Specific	c72865/1/1511|m.40283	c72865/1/1511|m.40283	c72865/1/1511|m.40283	.	1	1	1		1	1	1	1	1	0	0	1	0	0	1	0	0	10.5	10.5	10.5	25.334	219	219	0.0063898	5.9596	By MS/MS			10.5	0	0	0	0	0	0	0	0	0	1	0	0	1
Specific	c74596/1/2133|m.41586	c74596/1/2133|m.41586	c74596/1/2133|m.41586	.	1	1	1		1	1	1	1	0	1	0	0	1	0	0	1	0	19.2	19.2	19.2	13.234	120	120	0.0063492	5.9596		By MS/MS		0	19.2	0	0	0	0	0	0	0	0	0	1	0	1
Specific	c75294/1/1867|m.42131	c75294/1/1867|m.42131	c75294/1/1867|m.42131	.	1	1	1		1	1	1	1	0	1	1	0	1	1	0	1	1	6.7	6.7	6.7	12.659	119	119	0.033333	6.1669		By matching	By MS/MS	0	6.7	6.7	12584000	0	1379400	11205000	0	0	28653000	0	0	1	1
Specific	c77536/1/1393|m.44470	c77536/1/1393|m.44470	c77536/1/1393|m.44470	.	1	1	1		1	1	1	1	1	0	0	1	0	0	1	0	0	5.6	5.6	5.6	14.01	126	126	0.0063091	5.9596	By MS/MS			5.6	0	0	4874100	4874100	0	0	11599000	0	0	1	0	0	1
Specific	c246418/2/1415|m.91687	c246418/2/1415|m.91687	c246418/2/1415|m.91687	. hypothetical protein SOVF_190110 [Spinacia oleracea]^56%^E:1e-24	1	1	1		1	1	1	1	1	1	0	1	1	0	1	1	0	5.1	5.1	5.1	20.369	178	178	0.029851	6.071	By matching	By MS/MS		5.1	5.1	0	29045000	2880500	26165000	0	0	8295200	0	0	1	0	1
Specific	c212567/1/2355|m.86222	c212567/1/2355|m.86222	c212567/1/2355|m.86222	AB25G_ARATH^AB25G_ARATH^Q:55-536,H:12-484^62.245%ID^E:0^RecName: Full=ABC transporter G family member 25;^Eukaryota; Viridiplantae; Streptophyta; Embryophyta; Tracheophyta; Spermatophyta; Magnoliophyta; eudicotyledons; Gunneridae; Pentapetalae; rosids; malvids; Brassicales; Brassicaceae; Camelineae; Arabidopsis	1	1	1		1	1	1	1	0	1	0	0	1	0	0	1	0	1.7	1.7	1.7	59.01	536	536	0	19.137		By MS/MS		0	1.7	0	9326400	0	9326400	0	0	2942200	0	0	0	0	0
Specific	c125614/1/1482|m.57975	c125614/1/1482|m.57975	c125614/1/1482|m.57975	ABIL1_ARATH^ABIL1_ARATH^Q:1-245,H:1-239^64.49%ID^E:2.84e-107^RecName: Full=Protein ABIL1;^Eukaryota; Viridiplantae; Streptophyta; Embryophyta; Tracheophyta; Spermatophyta; Magnoliophyta; eudicotyledons; Gunneridae; Pentapetalae; rosids; malvids; Brassicales; Brassicaceae; Camelineae; Arabidopsis	1	1	1		1	1	1	1	0	0	1	0	0	1	0	0	1	2.6	2.6	2.6	30.213	269	269	0.021277	5.964			By MS/MS	0	0	2.6	329260000	0	0	329260000	0	0	672250000	0	0	0	0
Specific	c247251/1/1397|m.92384	c247251/1/1397|m.92384	c247251/1/1397|m.92384	ALKB8_XENTR^ALKB8_XENTR^Q:71-293,H:136-351^36.735%ID^E:3.91e-39^RecName: Full=Alkylated DNA repair protein alkB homolog 8;^Eukaryota; Metazoa; Chordata; Craniata; Vertebrata; Euteleostomi; Amphibia; Batrachia; Anura; Pipoidea; Pipidae; Xenopodinae; Xenopus; Silurana	1	1	1		1	1	1	1	1	0	1	1	0	1	1	0	1	5.5	5.5	5.5	33.126	293	293	0.055556	7.5452	By MS/MS		By MS/MS	5.5	0	5.5	23671000	5862300	0	17809000	0	0	2757900	0	0	0	0
Specific	c164590/1/1221|m.68756	c164590/1/1221|m.68756	c164590/1/1221|m.68756	ANXD5_ARATH^ANXD5_ARATH^Q:26-329,H:13-316^55.263%ID^E:9.69e-119^RecName: Full=Annexin D5;^Eukaryota; Viridiplantae; Streptophyta; Embryophyta; Tracheophyta; Spermatophyta; Magnoliophyta; eudicotyledons; Gunneridae; Pentapetalae; rosids; malvids; Brassicales; Brassicaceae; Camelineae; Arabidopsis	1	1	1		1	1	1	1	1	0	0	1	0	0	1	0	0	2.1	2.1	2.1	38.678	336	336	0.019608	5.9606	By MS/MS			2.1	0	0	5107800	5107800	0	0	1783000	0	0	0	0	0	0
Specific	c160053/1/1525|m.65272	c160053/1/1525|m.65272	c160053/1/1525|m.65272	APO1_COPRA^APO1_COPRA^Q:54-278,H:5-240^29.707%ID^E:1.74e-18^RecName: Full=Aromatic peroxygenase {ECO:0000312|EMBL:CAS12255.1};^Eukaryota; Fungi; Dikarya; Basidiomycota; Agaricomycotina; Agaricomycetes; Agaricomycetidae; Agaricales; Psathyrellaceae; Coprinellus	1	1	1		1	1	1	1	1	0	0	1	0	0	1	0	0	1.7	1.7	1.7	45.425	422	422	0.04878	6.9307	By MS/MS			1.7	0	0	2283000	2283000	0	0	796900	0	0	0	0	0	0
Specific	c208844/1/1586|m.83311	c208844/1/1586|m.83311	c208844/1/1586|m.83311	ASPG2_ARATH^ASPG2_ARATH^Q:11-146,H:165-295^43.796%ID^E:1.31e-20^RecName: Full=Protein ASPARTIC PROTEASE IN GUARD CELL 2;^Eukaryota; Viridiplantae; Streptophyta; Embryophyta; Tracheophyta; Spermatophyta; Magnoliophyta; eudicotyledons; Gunneridae; Pentapetalae; rosids; malvids; Brassicales; Brassicaceae; Camelineae; Arabidopsis	1	1	1		1	1	1	1	0	1	1	0	1	1	0	1	1	4.5	4.5	4.5	16.426	156	156	0.024096	5.9887		By matching	By MS/MS	0	4.5	4.5	12733000	0	12043000	689970	0	0	1732300	0	0	0	0
Specific	c7385/1/1924|m.7167	c7385/1/1924|m.7167	c7385/1/1924|m.7167	BAM1_ARATH^BAM1_ARATH^Q:3-124,H:169-290^86.885%ID^E:4.31e-70^RecName: Full=Beta-amylase 1, chloroplastic;^Eukaryota; Viridiplantae; Streptophyta; Embryophyta; Tracheophyta; Spermatophyta; Magnoliophyta; eudicotyledons; Gunneridae; Pentapetalae; rosids; malvids; Brassicales; Brassicaceae; Camelineae; Arabidopsis	1	1	1		1	1	1	1	0	1	1	0	1	1	0	1	1	5.9	5.9	5.9	15.556	136	136	0.032787	6.1558		By matching	By MS/MS	0	5.9	5.9	2866700	0	209390	2657300	0	0	7336700	0	0	0	0
Specific	c9941/1/1976|m.9556	c9941/1/1976|m.9556	c9941/1/1976|m.9556	DI3L2_ARATH^DI3L2_ARATH^Q:15-97,H:838-920^63.855%ID^E:3.34e-28^RecName: Full=DIS3-like exonuclease 2 {ECO:0000255|HAMAP-Rule:MF_03045};^Eukaryota; Viridiplantae; Streptophyta; Embryophyta; Tracheophyta; Spermatophyta; Magnoliophyta; eudicotyledons; Gunneridae; Pentapetalae; rosids; malvids; Brassicales; Brassicaceae; Camelineae; Arabidopsis	1	1	1		1	1	1	1	0	0	1	0	0	1	0	0	1	6.3	6.3	6.3	12.711	111	111	0.020833	5.9633			By MS/MS	0	0	6.3	6047700	0	0	6047700	0	0	1351900	0	0	0	0
Specific	c7351/2/1615|m.7131	c7351/2/1615|m.7131	c7351/2/1615|m.7131	EKI_ARATH^EKI_ARATH^Q:2-57,H:304-359^62.5%ID^E:1.01e-19^RecName: Full=Probable ethanolamine kinase;^Eukaryota; Viridiplantae; Streptophyta; Embryophyta; Tracheophyta; Spermatophyta; Magnoliophyta; eudicotyledons; Gunneridae; Pentapetalae; rosids; malvids; Brassicales; Brassicaceae; Camelineae; Arabidopsis	1	1	1		1	1	1	1	1	0	1	1	0	1	1	0	1	6.3	6.3	6.3	13.156	111	111	0.020408	5.9623	By matching		By MS/MS	6.3	0	6.3	34338000	9765800	0	24573000	0	0	7102500	0	0	0	0
Specific	c13534/1/1586|m.12663	c13534/1/1586|m.12663	c13534/1/1586|m.12663	GLN12_ARATH^GLN12_ARATH^Q:70-168,H:176-274^90.909%ID^E:1.13e-58^RecName: Full=Glutamine synthetase cytosolic isozyme 1-2;^Eukaryota; Viridiplantae; Streptophyta; Embryophyta; Tracheophyta; Spermatophyta; Magnoliophyta; eudicotyledons; Gunneridae; Pentapetalae; rosids; malvids; Brassicales; Brassicaceae; Camelineae; Arabidopsis	1	1	1		1	1	1	1	0	1	1	0	1	1	0	1	1	4.8	4.8	4.8	18.259	168	168	0.060606	8.7139		By MS/MS	By MS/MS	0	4.8	4.8	339480000	0	317020000	22457000	0	135390000	0	0	0	0	0
Specific	c304815/1/1857|m.28879	c304815/1/1857|m.28879	c304815/1/1857|m.28879	GUN21_ARATH^GUN21_ARATH^Q:3-96,H:245-346^35.398%ID^E:8.21e-11^RecName: Full=Endoglucanase 21;^Eukaryota; Viridiplantae; Streptophyta; Embryophyta; Tracheophyta; Spermatophyta; Magnoliophyta; eudicotyledons; Gunneridae; Pentapetalae; rosids; malvids; Brassicales; Brassicaceae; Camelineae; Arabidopsis	1	1	1		1	1	1	1	1	0	1	1	0	1	1	0	1	7.4	7.4	7.4	12.631	108	108	0.046512	6.9199	By MS/MS		By MS/MS	7.4	0	7.4	5922300	220560	0	5701800	0	0	1368000	0	0	0	0
Specific	c249131/1/2291|m.93696	c249131/1/2291|m.93696	c249131/1/2291|m.93696	PEX14_ARATH^PEX14_ARATH^Q:1-124,H:231-364^30.882%ID^E:3.27e-06^RecName: Full=Peroxisomal membrane protein PEX14;^Eukaryota; Viridiplantae; Streptophyta; Embryophyta; Tracheophyta; Spermatophyta; Magnoliophyta; eudicotyledons; Gunneridae; Pentapetalae; rosids; malvids; Brassicales; Brassicaceae; Camelineae; Arabidopsis	1	1	1		1	1	1	1	0	0	1	0	0	1	0	0	1	10.3	10.3	10.3	14.994	126	126	0.027397	6.0399			By MS/MS	0	0	10.3	10984000	0	0	10984000	0	0	2455500	0	0	0	0
Specific	c62723/1/1708|m.32483	c62723/1/1708|m.32483	c62723/1/1708|m.32483	PP302_ARATH^PP302_ARATH^Q:21-321,H:5-319^49.684%ID^E:2.05e-88^RecName: Full=Pentatricopeptide repeat-containing protein At4g02820, mitochondrial;^Eukaryota; Viridiplantae; Streptophyta; Embryophyta; Tracheophyta; Spermatophyta; Magnoliophyta; eudicotyledons; Gunneridae; Pentapetalae; rosids; malvids; Brassicales; Brassicaceae; Camelineae; Arabidopsis	1	1	1		1	1	1	1	1	0	1	1	0	1	1	0	1	2.5	2.5	2.5	36.764	322	322	0.045455	6.9199	By matching		By MS/MS	2.5	0	2.5	13739000	3863800	0	9875700	1828000	0	0	0	0	0	0
Specific	c7673/1/1802|m.7421	c7673/1/1802|m.7421	c7673/1/1802|m.7421	RD21A_ARATH^RD21A_ARATH^Q:266-766,H:166-331^48.538%ID^E:7.8e-42^RecName: Full=Cysteine proteinase RD21a;^Eukaryota; Viridiplantae; Streptophyta; Embryophyta; Tracheophyta; Spermatophyta; Magnoliophyta; eudicotyledons; Gunneridae; Pentapetalae; rosids; malvids; Brassicales; Brassicaceae; Camelineae; Arabidopsis`RD21A_ARATH^RD21A_ARATH^Q:1304-1444,H:381-427^42.553%ID^E:5.83e-08^RecName: Full=Cystei…	1	1	1		1	1	1	1	1	0	1	1	0	1	1	0	1	7.6	7.6	7.6	12.322	105	105	0.044444	6.9199	By MS/MS		By matching	7.6	0	7.6	26975000	17285000	0	9690500	4396500	0	0	0	0	0	0
Specific	c159286/1/2035|m.64642	c159286/1/2035|m.64642	c159286/1/2035|m.64642	RUBB_BRANA^RUBB_BRANA^Q:1-379,H:1-371^81.89%ID^E:0^RecName: Full=RuBisCO large subunit-binding protein subunit beta, chloroplastic;^Eukaryota; Viridiplantae; Streptophyta; Embryophyta; Tracheophyta; Spermatophyta; Magnoliophyta; eudicotyledons; Gunneridae; Pentapetalae; rosids; malvids; Brassicales; Brassicaceae; Brassiceae; Brassica	1	1	1		1	1	1	1	0	1	0	0	1	0	0	1	0	2	2	2	43.24	404	404	0.031746	6.1519		By MS/MS		0	2	0	1480700	0	1480700	0	0	415990	0	0	0	0	0
Specific	c206020/1/2024|m.81142	c206020/1/2024|m.81142	c206020/1/2024|m.81142	STC_RICCO^STC_RICCO^Q:568-750,H:13-73^45.902%ID^E:3.93e-22^RecName: Full=Sugar carrier protein C;^Eukaryota; Viridiplantae; Streptophyta; Embryophyta; Tracheophyta; Spermatophyta; Magnoliophyta; eudicotyledons; Gunneridae; Pentapetalae; rosids; fabids; Malpighiales; Euphorbiaceae; Acalyphoideae; Acalypheae; Ricinus`STC_RICCO^STC_RICCO^Q:980-1069,H:149-178^86.667%ID^E:3.93e-22^RecName: Full=Sugar …	1	1	1		1	1	1	1	0	1	0	0	1	0	0	1	0	6.7	6.7	6.7	12.428	105	105	0.02	5.9615		By MS/MS		0	6.7	0	6079100	0	6079100	0	0	2770600	0	0	0	0	0
Specific	c299329/1/1584|m.90360	c299329/1/1584|m.90360	c299329/1/1584|m.90360	UBA2C_ARATH^UBA2C_ARATH^Q:1-307,H:1-308^59.434%ID^E:2.03e-111^RecName: Full=UBP1-associated protein 2C;^Eukaryota; Viridiplantae; Streptophyta; Embryophyta; Tracheophyta; Spermatophyta; Magnoliophyta; eudicotyledons; Gunneridae; Pentapetalae; rosids; malvids; Brassicales; Brassicaceae; Camelineae; Arabidopsis	1	1	1		1	1	1	1	0	1	0	0	1	0	0	1	0	3.5	3.5	3.5	36.809	340	340	0.038462	6.4539		By MS/MS		0	3.5	0	35672000	0	35672000	0	0	10022000	0	0	0	0	0
Specific	c14827/1/1647|m.13750	c14827/1/1647|m.13750	c14827/1/1647|m.13750	UVR8_ARATH^UVR8_ARATH^Q:148-1119,H:40-363^63.303%ID^E:1.27e-130^RecName: Full=Ultraviolet-B receptor UVR8;^Eukaryota; Viridiplantae; Streptophyta; Embryophyta; Tracheophyta; Spermatophyta; Magnoliophyta; eudicotyledons; Gunneridae; Pentapetalae; rosids; malvids; Brassicales; Brassicaceae; Camelineae; Arabidopsis`UVR8_ARATH^UVR8_ARATH^Q:602-1339,H:191-436^49.627%ID^E:3.28e-65^RecName: Full=Ultravi…	1	1	1		1	1	1	1	0	0	1	0	0	1	0	0	1	7.8	7.8	7.8	11.558	102	102	0.057143	7.9928			By MS/MS	0	0	7.8	1751300	0	0	1751300	0	0	465220	0	0	0	0
Specific	c297506/1/1706|m.14392	c297506/1/1706|m.14392	c297506/1/1706|m.14392	Y3126_ARATH^Y3126_ARATH^Q:55-155,H:109-209^31.683%ID^E:1.03e-06^RecName: Full=Uncharacterized protein At3g61260;^Eukaryota; Viridiplantae; Streptophyta; Embryophyta; Tracheophyta; Spermatophyta; Magnoliophyta; eudicotyledons; Gunneridae; Pentapetalae; rosids; malvids; Brassicales; Brassicaceae; Camelineae; Arabidopsis	1	1	1		1	1	1	1	1	0	1	1	0	1	1	0	1	5	5	5	18.719	161	161	0.047619	6.9199	By MS/MS		By MS/MS	5	0	5	96884000	40650000	0	56234000	0	0	7779400	0	0	0	0
Specific	c212254/1/1599|m.85981	c212254/1/1599|m.85981	c212254/1/1599|m.85981	Y3475_ARATH^Y3475_ARATH^Q:24-339,H:591-908^47.561%ID^E:5.66e-84^RecName: Full=Probable LRR receptor-like serine/threonine-protein kinase At3g47570;^Eukaryota; Viridiplantae; Streptophyta; Embryophyta; Tracheophyta; Spermatophyta; Magnoliophyta; eudicotyledons; Gunneridae; Pentapetalae; rosids; malvids; Brassicales; Brassicaceae; Camelineae; Arabidopsis	1	1	1		1	1	1	1	0	0	1	0	0	1	0	0	1	2.1	2.1	2.1	37.943	339	339	0.019231	5.9598			By MS/MS	0	0	2.1	881950	0	0	881950	0	0	282760	0	0	0	0
Specific	c11839/1/1691|m.11229	c11839/1/1691|m.11229	c11839/1/1691|m.11229	Y2433_ARATH^Y2433_ARATH^Q:4-386,H:16-408^50.123%ID^E:4.63e-117^RecName: Full=Uncharacterized protein At2g24330;^Eukaryota; Viridiplantae; Streptophyta; Embryophyta; Tracheophyta; Spermatophyta; Magnoliophyta; eudicotyledons; Gunneridae; Pentapetalae; rosids; malvids; Brassicales; Brassicaceae; Camelineae; Arabidopsis	1	1	1		1	1	1	1	0	1	0	0	1	0	0	1	0	1.7	1.7	1.7	46.287	424	424	0.020619	5.9626		By MS/MS		0	1.7	0	7291600	0	7291600	0	0	2311700	0	0	0	0	0
Specific	c201354/1/956|m.77355	c201354/1/956|m.77355	c201354/1/956|m.77355	.	1	1	1		1	1	1	1	0	1	0	0	1	0	0	1	0	10.9	10.9	10.9	15.056	138	138	0.037736	6.4028		By MS/MS		0	10.9	0	10968000	0	10968000	0	0	3451000	0	0	0	0	0
Specific	c70049/1/7291|m.38023	c70049/1/7291|m.38023	c70049/1/7291|m.38023	.	1	1	1		1	1	1	1	0	1	0	0	1	0	0	1	0	6.4	6.4	6.4	11.647	109	109	0.020202	5.9623		By MS/MS		0	6.4	0	5827100	0	5827100	0	0	1847400	0	0	0	0	0
Specific	CON__ENSEMBL:ENSBTAP00000018574	CON__ENSEMBL:ENSBTAP00000018574	CON__ENSEMBL:ENSBTAP00000018574	#N/A	1	1	1		1	1	1	1	1	0	1	1	0	1	1	0	1	2.6	2.6	2.6	55.207	496	496	0.0062305	5.9596	By MS/MS		By matching	2.6	0	2.6	4789100	2296200	0	2492800	0	0	782010	1	0	0	1			+
Specific	CON__ENSEMBL:ENSBTAP00000024146	CON__ENSEMBL:ENSBTAP00000024146	CON__ENSEMBL:ENSBTAP00000024146	#N/A	1	1	1		1	1	1	1	1	1	0	1	1	0	1	1	0	1.6	1.6	1.6	164.34	1477	1477	0.0062112	5.9596	By MS/MS	By MS/MS		1.6	1.6	0	0	0	0	0	0	0	0	4	1	0	5			+
Specific	CON__P00761	CON__P00761	CON__P00761	#N/A	3	3	3		1	3	3	3	2	2	3	2	2	3	2	2	3	16.5	16.5	16.5	24.409	231	231	0	323.31	By MS/MS	By MS/MS	By MS/MS	7.8	7.8	16.5	1828900000	239240000	1239300000	350290000	205230000	505350000	83165000	11	23	24	58			+
Specific	CON__P04264	CON__P04264	CON__P04264	#N/A	7	7	4		1	7	7	4	2	1	7	2	1	7	1	0	4	12.4	12.4	7.5	66.017	644	644	0	323.31	By MS/MS	By MS/MS	By MS/MS	3.4	1.9	12.4	48340000	2898700	1533600	43908000	0	0	17781000	5	3	31	39			+
Specific	CON__P12763	CON__P12763	CON__P12763	#N/A	2	2	2		1	2	2	2	2	0	0	2	0	0	2	0	0	9.7	9.7	9.7	38.418	359	359	0	323.31	By MS/MS			9.7	0	0	11299000	11299000	0	0	1871000	0	0	10	0	0	10			+
Specific	CON__P13645	CON__P13645	CON__P13645	#N/A	1	1	1		1	1	1	1	0	0	1	0	0	1	0	0	1	3.2	3.2	3.2	59.51	593	593	0.051282	7.0751			By MS/MS	0	0	3.2	0	0	0	0	0	0	0	0	0	1	1			+
Specific	CON__P35527	CON__P35527	CON__P35527	#N/A	4	4	4		1	4	4	4	3	1	2	3	1	2	3	1	2	10.6	10.6	10.6	62.129	623	623	0	323.31	By MS/MS	By MS/MS	By MS/MS	8.3	2.6	4.8	29175000	17887000	8758800	2530100	0	0	793690	20	9	3	32			+
Specific	CON__Q1A7A4	CON__Q1A7A4	CON__Q1A7A4	#N/A	1	1	1		1	1	1	1	1	0	1	1	0	1	1	0	1	0.8	0.8	0.8	188.74	1677	1677	0.006192	5.9596	By MS/MS		By matching	0.8	0	0.8	4077100	3845000	0	232050	0	0	72797	1	0	0	1			+
Specific	CON__Q28107	CON__Q28107	CON__Q28107	#N/A	1	1	1		1	1	1	1	1	0	0	1	0	0	1	0	0	1	1	1	248.98	2211	2211	0.0061728	5.9596	By MS/MS			1	0	0	0	0	0	0	0	0	0	1	0	0	1			+
Specific	CON__Q2KJ83	CON__Q2KJ83	CON__Q2KJ83	#N/A	1	1	1		1	1	1	1	0	0	1	0	0	1	0	0	1	5	5	5	52.668	462	462	0.0061538	5.9596			By MS/MS	0	0	5	0	0	0	0	0	0	0	0	0	1	1			+
Specific	CON__Q3SY84	CON__Q3SY84	CON__Q3SY84	#N/A	1	1	1		1	1	1	1	1	0	0	1	0	0	1	0	0	4.4	4.4	4.4	57.249	523	523	0.006135	5.9596	By MS/MS			4.4	0	0	0	0	0	0	0	0	0	1	0	0	1			+
Specific	CON__Q3SZH5	CON__Q3SZH5	CON__Q3SZH5	#N/A	1	1	1		1	1	1	1	1	0	0	1	0	0	1	0	0	5.4	5.4	5.4	45.456	424	424	0.0061162	5.9596	By MS/MS			5.4	0	0	0	0	0	0	0	0	0	1	0	0	1			+
Specific	CON__Q9R4J5	CON__Q9R4J5	CON__Q9R4J5	#N/A	1	1	1		1	1	1	1	1	0	0	1	0	0	1	0	0	15.7	15.7	15.7	12.225	108	108	0	323.31	By MS/MS			15.7	0	0	18727000	18727000	0	0	18727000	0	0	4	0	0	4			+
Specific	REV__c10227/2/1422|m.9827	REV__c10227/2/1422|m.9827	REV__c10227/2/1422|m.9827	#N/A	1	1	1		1	1	1	1	0	1	0	0	1	0	0	1	0	0	0	0	45.02	408	408	0.0091743	5.9596		By MS/MS		0	0	0	0	0	0	0	0	0	0	0	1	0	1		+
Specific	REV__c303780/1/4082|m.28385	REV__c303780/1/4082|m.28385	REV__c303780/1/4082|m.28385	#N/A	2	2	2		1	2	2	2	2	0	0	2	0	0	2	0	0	0	0	0	130.43	1196	1196	0.04	11.919	By MS/MS			0	0	0	0	0	0	0	0	0	0	2	0	0	2		+
Specific	REV__c4900/1/2359|m.4847	REV__c4900/1/2359|m.4847	REV__c4900/1/2359|m.4847	#N/A	2	2	2		1	2	2	2	1	1	1	1	1	1	1	1	1	0	0	0	15.696	136	136	0.08	11.919	By MS/MS	By MS/MS	By matching	0	0	0	33592000	9607000	600720	23385000	0	0	7497200	1	0	0	1		+
Specific	NrPrx1;c157664/1/1175|m.63356	NrPrx1;c157664/1/1175|m.63356	NrPrx1	Cat. peroxidase 1, Lee at al. 2016	2;2	2;2	2;2	;	2	2	2	2	2	0	1	2	0	1	2	0	1	7.6	7.6	7.6	33.598	317	317;317	0	12.465	By MS/MS		By MS/MS	7.6	0	4.7	6098100	3464200	0	2634000	3548500	0	0	2	0	1	3
Specific	REV__c263611/1/1306|m.30503;c263611/1/1306|m.30503	REV__c263611/1/1306|m.30503;c263611/1/1306|m.30503	REV__c263611/1/1306|m.30503	#N/A	2;2	2;2	2;2	;	2	2	2	2	2	0	1	2	0	1	2	0	1	2.6	2.6	2.6	38.878	343	343;343	0	13.437	By MS/MS		By matching	2.6	0	2.3	14183000	12739000	0	1443300	4446800	0	0	0	0	0	0		+
Specific	c212060/2/1952|m.85848;c74773/1/1905|m.41720	c212060/2/1952|m.85848;c74773/1/1905|m.41720	c212060/2/1952|m.85848	2A5T_ARATH^2A5T_ARATH^Q:43-214,H:30-203^65.193%ID^E:1.03e-73^RecName: Full=Serine/threonine protein phosphatase 2A 57 kDa regulatory subunit B' theta isoform;^Eukaryota; Viridiplantae; Streptophyta; Embryophyta; Tracheophyta; Spermatophyta; Magnoliophyta; eudicotyledons; Gunneridae; Pentapetalae; rosids; malvids; Brassicales; Brassicaceae; Camelineae; Arabidopsis	1;1	1;1	1;1	;	2	1	1	1	1	1	1	1	1	1	1	1	1	3.2	3.2	3.2	24.184	216	216;233	0.0089686	5.9596	By matching	By matching	By MS/MS	3.2	3.2	3.2	1253300	515620	59344	678330	1070300	0	0	0	0	1	1
Specific	c5266/1/1556|m.5169;c37333/1/1836|m.25749	c5266/1/1556|m.5169;c37333/1/1836|m.25749	c5266/1/1556|m.5169	6GPD3_ARATH^6GPD3_ARATH^Q:1-59,H:348-406^84.746%ID^E:5.77e-29^RecName: Full=6-phosphogluconate dehydrogenase, decarboxylating 3;^Eukaryota; Viridiplantae; Streptophyta; Embryophyta; Tracheophyta; Spermatophyta; Magnoliophyta; eudicotyledons; Gunneridae; Pentapetalae; rosids; malvids; Brassicales; Brassicaceae; Camelineae; Arabidopsis	1;1	1;1	1;1	;	2	1	1	1	0	1	0	0	1	0	0	1	0	17.3	17.3	17.3	14.881	133	133;156	0.0068493	5.9596		By MS/MS		0	17.3	0	0	0	0	0	0	0	0	0	1	0	1
Specific	c157202/1/1533|m.63033;c120643/1/1520|m.54327	c157202/1/1533|m.63033;c120643/1/1520|m.54327	c157202/1/1533|m.63033	LISC_RICCO^LISC_RICCO^Q:1-101,H:261-361^92.079%ID^E:4.71e-62^RecName: Full=Lipoyl synthase, chloroplastic {ECO:0000255|HAMAP-Rule:MF_03129};^Eukaryota; Viridiplantae; Streptophyta; Embryophyta; Tracheophyta; Spermatophyta; Magnoliophyta; eudicotyledons; Gunneridae; Pentapetalae; rosids; fabids; Malpighiales; Euphorbiaceae; Acalyphoideae; Acalypheae; Ricinus	1;1	1;1	1;1	;	2	1	1	1	1	0	0	1	0	0	1	0	0	22.1	22.1	22.1	11.773	104	104;221	0.014085	5.9596	By MS/MS			22.1	0	0	0	0	0	0	0	0	0	1	0	0	1
Specific	c111265/1/1577|m.47420;c258931/1/2256|m.101074	c111265/1/1577|m.47420;c258931/1/2256|m.101074	c111265/1/1577|m.47420	ATE1_ARATH^ATE1_ARATH^Q:5-329,H:253-594^53.409%ID^E:1.06e-111^RecName: Full=Arginyl-tRNA--protein transferase 1;^Eukaryota; Viridiplantae; Streptophyta; Embryophyta; Tracheophyta; Spermatophyta; Magnoliophyta; eudicotyledons; Gunneridae; Pentapetalae; rosids; malvids; Brassicales; Brassicaceae; Camelineae; Arabidopsis	1;1	1;1	1;1	;	2	1	1	1	0	0	1	0	0	1	0	0	1	2.1	2.1	2.1	38.781	339	339;610	0.017699	5.9596			By MS/MS	0	0	2.1	7704300	0	0	7704300	0	0	19847000	0	0	2	2
Specific	c207714/1/1476|m.82459;c27503/1/1581|m.17370	c207714/1/1476|m.82459;c27503/1/1581|m.17370	c207714/1/1476|m.82459	BBD1_ARATH^BBD1_ARATH^Q:2-132,H:24-149^61.029%ID^E:1.1e-45^RecName: Full=Bifunctional nuclease 1;^Eukaryota; Viridiplantae; Streptophyta; Embryophyta; Tracheophyta; Spermatophyta; Magnoliophyta; eudicotyledons; Gunneridae; Pentapetalae; rosids; malvids; Brassicales; Brassicaceae; Camelineae; Arabidopsis	1;1	1;1	1;1	;	2	1	1	1	1	0	0	1	0	0	1	0	0	17.4	17.4	17.4	14.584	132	132;327	0.0092593	5.9596	By MS/MS			17.4	0	0	0	0	0	0	0	0	0	1	0	0	1
Specific	c206603/1/2299|m.81564;c297515/1/2432|m.23824	c206603/1/2299|m.81564;c297515/1/2432|m.23824	c206603/1/2299|m.81564	BIG_ORYSJ^BIG_ORYSJ^Q:1-220,H:4441-4660^74.545%ID^E:4.46e-111^RecName: Full=Auxin transport protein BIG;^Eukaryota; Viridiplantae; Streptophyta; Embryophyta; Tracheophyta; Spermatophyta; Magnoliophyta; Liliopsida; Poales; Poaceae; BEP clade; Ehrhartoideae; Oryzeae; Oryza	1;1	1;1	1;1	;	2	1	1	1	1	0	0	1	0	0	1	0	0	10.5	10.5	10.5	24.712	220	220;264	0.0093897	5.9596	By MS/MS			10.5	0	0	0	0	0	0	0	0	0	1	0	0	1
Specific	c127151/1/1522|m.59176;c301213/1/1215|m.27076	c127151/1/1522|m.59176;c301213/1/1215|m.27076	c127151/1/1522|m.59176	BPS1_ARATH^BPS1_ARATH^Q:1-143,H:1-150^52%ID^E:8.22e-41^RecName: Full=Protein BPS1, chloroplastic;^Eukaryota; Viridiplantae; Streptophyta; Embryophyta; Tracheophyta; Spermatophyta; Magnoliophyta; eudicotyledons; Gunneridae; Pentapetalae; rosids; malvids; Brassicales; Brassicaceae; Camelineae; Arabidopsis	1;1	1;1	1;1	;	2	1	1	1	1	0	0	1	0	0	1	0	0	16.1	16.1	16.1	16.212	143	143;193	0.013072	5.9596	By MS/MS			16.1	0	0	0	0	0	0	0	0	0	1	0	0	1
Specific	c65052/1/1602|m.34208;c123368/2/1557|m.56339	c65052/1/1602|m.34208;c123368/2/1557|m.56339	c65052/1/1602|m.34208	C81E1_GLYEC^C81E1_GLYEC^Q:1-253,H:185-439^51.351%ID^E:4.11e-91^RecName: Full=Isoflavone 2'-hydroxylase;^Eukaryota; Viridiplantae; Streptophyta; Embryophyta; Tracheophyta; Spermatophyta; Magnoliophyta; eudicotyledons; Gunneridae; Pentapetalae; rosids; fabids; Fabales; Fabaceae; Papilionoideae; Galegeae; Glycyrrhiza	1;1	1;1	1;1	;	2	1	1	1	1	0	1	1	0	1	1	0	1	2.8	2.8	2.8	29.31	254	254;310	0.013793	5.9596	By MS/MS		By matching	2.8	0	2.8	2053400	1661200	0	392270	0	0	1267400	1	0	0	1
Specific	c5012/3/1603|m.4930;c9814/1/1431|m.9440	c5012/3/1603|m.4930;c9814/1/1431|m.9440	c5012/3/1603|m.4930	CBPD_RAT^CBPD_RAT^Q:7-152,H:317-462^42.953%ID^E:3.5e-27^RecName: Full=Carboxypeptidase D;^Eukaryota; Metazoa; Chordata; Craniata; Vertebrata; Euteleostomi; Mammalia; Eutheria; Euarchontoglires; Glires; Rodentia; Sciurognathi; Muroidea; Muridae; Murinae; Rattus`CBPD_RAT^CBPD_RAT^Q:1-149,H:723-870^41.06%ID^E:1.27e-24^RecName: Full=Carboxypeptidase D;^Eukaryota; Metazoa; Chordata; Craniata; Vertebra…	1;1	1;1	1;1	;	2	1	1	1	1	0	0	1	0	0	1	0	0	10.2	10.2	10.2	25.103	225	225;441	0.0067568	5.9596	By MS/MS			10.2	0	0	0	0	0	0	0	0	0	1	0	0	1
Specific	c71904/1/1587|m.39531;c31325/1/1340|m.20401	c71904/1/1587|m.39531;c31325/1/1340|m.20401	c71904/1/1587|m.39531	CRCK3_ARATH^CRCK3_ARATH^Q:1-95,H:400-494^61.053%ID^E:6.84e-33^RecName: Full=Calmodulin-binding receptor-like cytoplasmic kinase 3;^Eukaryota; Viridiplantae; Streptophyta; Embryophyta; Tracheophyta; Spermatophyta; Magnoliophyta; eudicotyledons; Gunneridae; Pentapetalae; rosids; malvids; Brassicales; Brassicaceae; Camelineae; Arabidopsis	1;1	1;1	1;1	;	2	1	1	1	1	1	1	1	1	1	1	1	1	5.9	5.9	5.9	13.82	119	119;411	0.0070423	5.9596	By MS/MS	By matching	By matching	5.9	5.9	5.9	123940000	41972000	8745700	73221000	0	0	151260000	1	0	0	1
Specific	c37018/2/1625|m.25456;c128417/1/1845|m.60076	c37018/2/1625|m.25456;c128417/1/1845|m.60076	c37018/2/1625|m.25456	E1310_ARATH^E1310_ARATH^Q:29-103,H:229-307^39.535%ID^E:4e-09^RecName: Full=Glucan endo-1,3-beta-glucosidase 10;^Eukaryota; Viridiplantae; Streptophyta; Embryophyta; Tracheophyta; Spermatophyta; Magnoliophyta; eudicotyledons; Gunneridae; Pentapetalae; rosids; malvids; Brassicales; Brassicaceae; Camelineae; Arabidopsis	1;1	1;1	1;1	;	2	1	1	1	1	0	1	1	0	1	1	0	1	12.3	12.3	12.3	11.971	106	106;318	0.012821	5.9596	By MS/MS		By matching	12.3	0	12.3	16577000	16449000	0	127490	6630000	0	0	1	0	0	1
Specific	c110962/2/1259|m.47091;c111769/1/1356|m.47770	c110962/2/1259|m.47091;c111769/1/1356|m.47770	c110962/2/1259|m.47091	F179B_MOUSE^F179B_MOUSE^Q:61-262,H:1251-1451^27.184%ID^E:1.17e-12^RecName: Full=Protein FAM179B;^Eukaryota; Metazoa; Chordata; Craniata; Vertebrata; Euteleostomi; Mammalia; Eutheria; Euarchontoglires; Glires; Rodentia; Sciurognathi; Muroidea; Muridae; Murinae; Mus; Mus	1;1	1;1	1;1	;	2	1	1	1	1	0	1	1	0	1	1	0	1	7.5	7.5	7.5	34.063	305	305;325	0.018018	5.9596	By MS/MS		By MS/MS	7.5	0	7.5	0	0	0	0	0	0	0	1	0	1	2
Specific	c5209/2/1443|m.5110;c25972/1/1618|m.16222	c5209/2/1443|m.5110;c25972/1/1618|m.16222	c5209/2/1443|m.5110	HHP2_ARATH^HHP2_ARATH^Q:30-112,H:217-318^50%ID^E:5.62e-20^RecName: Full=Heptahelical transmembrane protein 2;^Eukaryota; Viridiplantae; Streptophyta; Embryophyta; Tracheophyta; Spermatophyta; Magnoliophyta; eudicotyledons; Gunneridae; Pentapetalae; rosids; malvids; Brassicales; Brassicaceae; Camelineae; Arabidopsis	1;1	1;1	1;1	;	2	1	1	1	1	0	0	1	0	0	1	0	0	16.8	16.8	16.8	15.426	137	137;154	0.007722	5.9596	By MS/MS			16.8	0	0	0	0	0	0	0	0	0	1	0	0	1
Specific	c166301/1/1643|m.70015;c250384/1/1842|m.94640	c166301/1/1643|m.70015;c250384/1/1842|m.94640	c166301/1/1643|m.70015	HMGCL_ARATH^HMGCL_ARATH^Q:34-467,H:36-468^68.276%ID^E:0^RecName: Full=Hydroxymethylglutaryl-CoA lyase, mitochondrial;^Eukaryota; Viridiplantae; Streptophyta; Embryophyta; Tracheophyta; Spermatophyta; Magnoliophyta; eudicotyledons; Gunneridae; Pentapetalae; rosids; malvids; Brassicales; Brassicaceae; Camelineae; Arabidopsis	1;1	1;1	1;1	;	2	1	1	1	1	0	0	1	0	0	1	0	0	4.9	4.9	4.9	50.694	471	471;508	0.010811	5.9596	By MS/MS			4.9	0	0	0	0	0	0	0	0	0	1	0	0	1
Specific	c254201/1/1339|m.97547;c156729/1/2179|m.62661	c254201/1/1339|m.97547;c156729/1/2179|m.62661	c254201/1/1339|m.97547	KTNA1_ARATH^KTNA1_ARATH^Q:1-148,H:58-204^57.333%ID^E:1.05e-45^RecName: Full=Katanin p60 ATPase-containing subunit A1 {ECO:0000255|HAMAP-Rule:MF_03023};^Eukaryota; Viridiplantae; Streptophyta; Embryophyta; Tracheophyta; Spermatophyta; Magnoliophyta; eudicotyledons; Gunneridae; Pentapetalae; rosids; malvids; Brassicales; Brassicaceae; Camelineae; Arabidopsis	1;1	1;1	1;1	;	2	1	1	1	1	0	0	1	0	0	1	0	0	4.7	4.7	4.7	15.674	148	148;521	0.012048	5.9596	By MS/MS			4.7	0	0	3886100	3886100	0	0	1899400	0	0	1	0	0	1
Specific	c730/20/1566|m.607;c13021/1/1487|m.12230	c730/20/1566|m.607;c13021/1/1487|m.12230	c730/20/1566|m.607	MAEA_DANRE^MAEA_DANRE^Q:61-442,H:8-395^40%ID^E:2.93e-91^RecName: Full=Macrophage erythroblast attacher;^Eukaryota; Metazoa; Chordata; Craniata; Vertebrata; Euteleostomi; Actinopterygii; Neopterygii; Teleostei; Ostariophysi; Cypriniformes; Cyprinidae; Danio	1;1	1;1	1;1	;	2	1	1	1	1	0	0	1	0	0	1	0	0	1.8	1.8	1.8	49.991	443	443;443	0.021505	5.9667	By MS/MS			1.8	0	0	0	0	0	0	0	0	0	1	0	0	1
Specific	c165119/1/1633|m.69130;c155479/1/1650|m.61683	c165119/1/1633|m.69130;c155479/1/1650|m.61683	c165119/1/1633|m.69130	PEX10_ARATH^PEX10_ARATH^Q:48-92,H:22-66^80%ID^E:1.76e-18^RecName: Full=Peroxisome biogenesis factor 10;^Eukaryota; Viridiplantae; Streptophyta; Embryophyta; Tracheophyta; Spermatophyta; Magnoliophyta; eudicotyledons; Gunneridae; Pentapetalae; rosids; malvids; Brassicales; Brassicaceae; Camelineae; Arabidopsis	1;1	1;1	1;1	;	2	1	1	1	1	0	0	1	0	0	1	0	0	18.9	18.9	18.9	12.952	122	122;434	0.012121	5.9596	By MS/MS			18.9	0	0	0	0	0	0	0	0	0	1	0	0	1
Specific	c4749/1/1754|m.4718;c12455/1/1507|m.11730	c4749/1/1754|m.4718;c12455/1/1507|m.11730	c4749/1/1754|m.4718	PIGT_HUMAN^PIGT_HUMAN^Q:1-132,H:160-284^39.552%ID^E:1.77e-19^RecName: Full=GPI transamidase component PIG-T;^Eukaryota; Metazoa; Chordata; Craniata; Vertebrata; Euteleostomi; Mammalia; Eutheria; Euarchontoglires; Primates; Haplorrhini; Catarrhini; Hominidae; Homo	1;1	1;1	1;1	;	2	1	1	1	0	0	1	0	0	1	0	0	1	13.2	13.2	13.2	19.742	174	174;465	0.013699	5.9596			By MS/MS	0	0	13.2	0	0	0	0	0	0	0	0	0	1	1
Specific	c259748/1/1629|m.101658;c209250/1/1510|m.83630	c259748/1/1629|m.101658;c209250/1/1510|m.83630	c259748/1/1629|m.101658	PNP2_ARATH^PNP2_ARATH^Q:1-90,H:81-169^73.333%ID^E:5.69e-35^RecName: Full=Polyribonucleotide nucleotidyltransferase 2, mitochondrial;^Eukaryota; Viridiplantae; Streptophyta; Embryophyta; Tracheophyta; Spermatophyta; Magnoliophyta; eudicotyledons; Gunneridae; Pentapetalae; rosids; malvids; Brassicales; Brassicaceae; Camelineae; Arabidopsis`PNP2_ARATH^PNP2_ARATH^Q:104-225,H:863-987^44.186%ID^E:3.86e…	1;1	1;1	1;1	;	2	1	1	1	1	0	0	1	0	0	1	0	0	10.1	10.1	10.1	25.035	228	228;299	0.0091324	5.9596	By MS/MS			10.1	0	0	0	0	0	0	0	0	0	1	0	0	1
Specific	c256857/1/1538|m.99548;c215328/1/1303|m.88429	c256857/1/1538|m.99548;c215328/1/1303|m.88429	c256857/1/1538|m.99548	PPSP2_ARATH^PPSP2_ARATH^Q:84-167,H:7-90^61.905%ID^E:4.73e-29^RecName: Full=Inorganic pyrophosphatase 2;^Eukaryota; Viridiplantae; Streptophyta; Embryophyta; Tracheophyta; Spermatophyta; Magnoliophyta; eudicotyledons; Gunneridae; Pentapetalae; rosids; malvids; Brassicales; Brassicaceae; Camelineae; Arabidopsis	1;1	1;1	1;1	;	2	1	1	1	1	0	1	1	0	1	1	0	1	7.8	7.8	7.8	19.761	167	167;318	0.0087719	5.9596	By MS/MS		By matching	7.8	0	7.8	10099000	9173500	0	925360	0	0	296670	1	0	0	1
Specific	c167428/1/2483|m.70883;c124818/2/2363|m.57421	c167428/1/2483|m.70883;c124818/2/2363|m.57421	c167428/1/2483|m.70883	PUM24_ARATH^PUM24_ARATH^Q:1-550,H:98-639^57.143%ID^E:0^RecName: Full=Pumilio homolog 24;^Eukaryota; Viridiplantae; Streptophyta; Embryophyta; Tracheophyta; Spermatophyta; Magnoliophyta; eudicotyledons; Gunneridae; Pentapetalae; rosids; malvids; Brassicales; Brassicaceae; Camelineae; Arabidopsis	1;1	1;1	1;1	;	2	1	1	1	1	1	0	1	1	0	1	1	0	1.3	1.3	1.3	61.877	555	555;667	0.035088	6.2725	By MS/MS	By MS/MS		1.3	1.3	0	3738400	1213400	2525000	0	0	753710	0	1	1	0	2
Specific	c210070/1/2552|m.84299;c161212/1/1552|m.66166	c210070/1/2552|m.84299;c161212/1/1552|m.66166	c210070/1/2552|m.84299	RFS2_ARATH^RFS2_ARATH^Q:1-254,H:482-757^48.736%ID^E:1.34e-83^RecName: Full=Probable galactinol--sucrose galactosyltransferase 2;^Eukaryota; Viridiplantae; Streptophyta; Embryophyta; Tracheophyta; Spermatophyta; Magnoliophyta; eudicotyledons; Gunneridae; Pentapetalae; rosids; malvids; Brassicales; Brassicaceae; Camelineae; Arabidopsis	1;1	1;1	1;1	;	2	1	1	1	1	1	0	1	1	0	1	1	0	2.6	2.6	2.6	28.958	267	267;485	0.011429	5.9596	By MS/MS	By matching		2.6	2.6	0	8972800	5726800	3246100	0	0	21034000	0	1	0	0	1
Specific	c9680/1/2101|m.9319;c256495/1/2563|m.99277	c9680/1/2101|m.9319;c256495/1/2563|m.99277	c9680/1/2101|m.9319	RFS6_ARATH^RFS6_ARATH^Q:1-112,H:94-207^77.193%ID^E:1.67e-54^RecName: Full=Probable galactinol--sucrose galactosyltransferase 6;^Eukaryota; Viridiplantae; Streptophyta; Embryophyta; Tracheophyta; Spermatophyta; Magnoliophyta; eudicotyledons; Gunneridae; Pentapetalae; rosids; malvids; Brassicales; Brassicaceae; Camelineae; Arabidopsis	1;1	1;1	1;1	;	2	1	1	1	1	0	1	1	0	1	1	0	1	17.6	17.6	17.6	14.445	131	131;614	0.007874	5.9596	By MS/MS		By MS/MS	17.6	0	17.6	0	0	0	0	0	0	0	1	0	1	2
Specific	c306632/1/2121|m.29716;c160149/1/1927|m.65352	c306632/1/2121|m.29716;c160149/1/1927|m.65352	c306632/1/2121|m.29716	RTF1_SCHPO^RTF1_SCHPO^Q:76-241,H:219-380^31.928%ID^E:4.03e-20^RecName: Full=RNA polymerase-associated protein C651.09c;^Eukaryota; Fungi; Dikarya; Ascomycota; Taphrinomycotina; Schizosaccharomycetes; Schizosaccharomycetales; Schizosaccharomycetaceae; Schizosaccharomyces	1;1	1;1	1;1	;	2	1	1	1	1	1	1	1	1	1	1	1	1	2.9	2.9	2.9	27.446	243	243;487	0.011696	5.9596	By matching	By matching	By MS/MS	2.9	2.9	2.9	212240000	68075000	13573000	130600000	156160000	0	0	0	0	1	1
Specific	c67269/1/2429|m.35863;c169185/1/1211|m.72237	c67269/1/2429|m.35863;c169185/1/1211|m.72237	c67269/1/2429|m.35863	SAE2_ARATH^SAE2_ARATH^Q:1-134,H:398-531^70.896%ID^E:6.84e-63^RecName: Full=SUMO-activating enzyme subunit 2;^Eukaryota; Viridiplantae; Streptophyta; Embryophyta; Tracheophyta; Spermatophyta; Magnoliophyta; eudicotyledons; Gunneridae; Pentapetalae; rosids; malvids; Brassicales; Brassicaceae; Camelineae; Arabidopsis	1;1	1;1	1;1	;	2	1	1	1	1	0	0	1	0	0	1	0	0	9.5	9.5	9.5	26.973	243	243;289	0.010471	5.9596	By MS/MS			9.5	0	0	0	0	0	0	0	0	0	1	0	0	1
Specific	c112923/1/1803|m.48551;c158740/1/1106|m.64225	c112923/1/1803|m.48551;c158740/1/1106|m.64225	c112923/1/1803|m.48551	SDC1_ARATH^SDC1_ARATH^Q:1-273,H:210-481^83.15%ID^E:1.08e-169^RecName: Full=Serine decarboxylase;^Eukaryota; Viridiplantae; Streptophyta; Embryophyta; Tracheophyta; Spermatophyta; Magnoliophyta; eudicotyledons; Gunneridae; Pentapetalae; rosids; malvids; Brassicales; Brassicaceae; Camelineae; Arabidopsis	1;1	1;1	1;1	;	2	1	1	1	1	0	1	1	0	1	1	0	1	8.4	8.4	8.4	30.666	274	274;316	0.016949	5.9596	By MS/MS		By MS/MS	8.4	0	8.4	0	0	0	0	0	0	0	1	0	1	2
Specific	c249018/1/1623|m.93626;c171482/3/2202|m.73992	c249018/1/1623|m.93626;c171482/3/2202|m.73992	c249018/1/1623|m.93626	SRPR_MOUSE^SRPR_MOUSE^Q:1-468,H:1-470^37.778%ID^E:1.41e-79^RecName: Full=Signal recognition particle receptor subunit alpha;^Eukaryota; Metazoa; Chordata; Craniata; Vertebrata; Euteleostomi; Mammalia; Eutheria; Euarchontoglires; Glires; Rodentia; Sciurognathi; Muroidea; Muridae; Murinae; Mus; Mus	1;1	1;1	1;1	;	2	1	1	1	1	0	1	1	0	1	1	0	1	1.5	1.5	1.5	52.561	472	472;620	0.010309	5.9596	By MS/MS		By matching	1.5	0	1.5	4254000	1239200	0	3014800	0	0	8919800	1	0	0	1
Specific	c4202/1/1401|m.4222;c2533/10/1511|m.2724	c4202/1/1401|m.4222;c2533/10/1511|m.2724	c4202/1/1401|m.4222	SYFM_ARATH^SYFM_ARATH^Q:19-228,H:45-262^75.229%ID^E:1.39e-113^RecName: Full=Phenylalanine--tRNA ligase, chloroplastic/mitochondrial;^Eukaryota; Viridiplantae; Streptophyta; Embryophyta; Tracheophyta; Spermatophyta; Magnoliophyta; eudicotyledons; Gunneridae; Pentapetalae; rosids; malvids; Brassicales; Brassicaceae; Camelineae; Arabidopsis	1;1	1;1	1;1	;	2	1	1	1	0	0	1	0	0	1	0	0	1	2.8	2.8	2.8	27.787	247	247;434	0.0081301	5.9596			By MS/MS	0	0	2.8	8464400	0	0	8464400	0	0	16942000	0	0	1	1
Specific	c33466/1/1580|m.22043;c246549/2/2336|m.91860	c33466/1/1580|m.22043;c246549/2/2336|m.91860	c33466/1/1580|m.22043	TGT2_ARATH^TGT2_ARATH^Q:132-254,H:367-487^65.041%ID^E:2.2e-47^RecName: Full=Trihelix transcription factor GT-2;^Eukaryota; Viridiplantae; Streptophyta; Embryophyta; Tracheophyta; Spermatophyta; Magnoliophyta; eudicotyledons; Gunneridae; Pentapetalae; rosids; malvids; Brassicales; Brassicaceae; Camelineae; Arabidopsis`TGT2_ARATH^TGT2_ARATH^Q:160-250,H:37-126^42.857%ID^E:2.94e-18^RecName: Full=Trih…	1;1	1;1	1;1	;	2	1	1	1	1	0	0	1	0	0	1	0	0	3.7	3.7	3.7	38.008	347	347;399	0.0084746	5.9596	By MS/MS			3.7	0	0	7683000	7683000	0	0	3755300	0	0	1	0	0	1
Specific	c77513/1/1426|m.44445;c127283/3/2315|m.59284	c77513/1/1426|m.44445;c127283/3/2315|m.59284	c77513/1/1426|m.44445	THD1_ARATH^THD1_ARATH^Q:1-150,H:188-337^74.667%ID^E:5.71e-65^RecName: Full=Threonine dehydratase biosynthetic, chloroplastic;^Eukaryota; Viridiplantae; Streptophyta; Embryophyta; Tracheophyta; Spermatophyta; Magnoliophyta; eudicotyledons; Gunneridae; Pentapetalae; rosids; malvids; Brassicales; Brassicaceae; Camelineae; Arabidopsis	1;1	1;1	1;1	;	2	1	1	1	0	1	0	0	1	0	0	1	0	5.3	5.3	5.3	16.2	150	150;356	0.021053	5.9634		By MS/MS		0	5.3	0	0	0	0	0	0	0	0	0	1	0	1
Specific	c12646/1/1409|m.11889;c63098/6/1421|m.32766	c12646/1/1409|m.11889;c63098/6/1421|m.32766	c12646/1/1409|m.11889	TLP1_PRUPE^TLP1_PRUPE^Q:43-292,H:2-246^54.8%ID^E:2.27e-87^RecName: Full=Thaumatin-like protein 1;^Eukaryota; Viridiplantae; Streptophyta; Embryophyta; Tracheophyta; Spermatophyta; Magnoliophyta; eudicotyledons; Gunneridae; Pentapetalae; rosids; fabids; Rosales; Rosaceae; Maloideae; Amygdaleae; Prunus	1;1	1;1	1;1	;	2	1	1	1	1	0	0	1	0	0	1	0	0	3.9	3.9	3.9	32.376	306	306;358	0	49.997	By MS/MS			3.9	0	0	2397400	2397400	0	0	1131500	0	0	2	0	0	2
Specific	c212300/1/1582|m.86020;c66027/1/1389|m.34994	c212300/1/1582|m.86020;c66027/1/1389|m.34994	c212300/1/1582|m.86020	TM147_HUMAN^TM147_HUMAN^Q:62-511,H:1-147^37.086%ID^E:1.62e-19^RecName: Full=Transmembrane protein 147;^Eukaryota; Metazoa; Chordata; Craniata; Vertebrata; Euteleostomi; Mammalia; Eutheria; Euarchontoglires; Primates; Haplorrhini; Catarrhini; Hominidae; Homo	1;1	1;1	1;1	;	2	1	1	1	0	0	1	0	0	1	0	0	1	14.6	14.6	14.6	17.914	158	158;168	0.0088889	5.9596			By MS/MS	0	0	14.6	0	0	0	0	0	0	0	0	0	1	1
Specific	c73195/4/2326|m.40550;c164551/1/2308|m.68720	c73195/4/2326|m.40550;c164551/1/2308|m.68720	c73195/4/2326|m.40550	TMN3_ARATH^TMN3_ARATH^Q:24-492,H:21-494^81.013%ID^E:0^RecName: Full=Transmembrane 9 superfamily member 3 {ECO:0000305};^Eukaryota; Viridiplantae; Streptophyta; Embryophyta; Tracheophyta; Spermatophyta; Magnoliophyta; eudicotyledons; Gunneridae; Pentapetalae; rosids; malvids; Brassicales; Brassicaceae; Camelineae; Arabidopsis	1;1	1;1	1;1	;	2	1	1	1	1	0	0	1	0	0	1	0	0	4.6	4.6	4.6	56.618	498	498;595	0.010989	5.9596	By MS/MS			4.6	0	0	0	0	0	0	0	0	0	1	0	0	1
Specific	c4276/1/1579|m.4306;c298738/1/1501|m.90056	c4276/1/1579|m.4306;c298738/1/1501|m.90056	c4276/1/1579|m.4306	TRDMT_BOVIN^TRDMT_BOVIN^Q:31-340,H:2-312^37.224%ID^E:5.12e-62^RecName: Full=tRNA (cytosine-5-)-methyltransferase;^Eukaryota; Metazoa; Chordata; Craniata; Vertebrata; Euteleostomi; Mammalia; Eutheria; Laurasiatheria; Cetartiodactyla; Ruminantia; Pecora; Bovidae; Bovinae; Bos	1;1	1;1	1;1	;	2	1	1	1	0	1	0	0	1	0	0	1	0	2	2	2	39.979	349	349;368	0.0073801	5.9596		By MS/MS		0	2	0	442990	0	442990	0	0	201890	0	0	1	0	1
Specific	c61797/3/1902|m.31802;c306200/1/1834|m.29495	c61797/3/1902|m.31802;c306200/1/1834|m.29495	c61797/3/1902|m.31802	U75B1_ARATH^U75B1_ARATH^Q:50-114,H:362-433^43.056%ID^E:5.33e-06^RecName: Full=UDP-glycosyltransferase 75B1;^Eukaryota; Viridiplantae; Streptophyta; Embryophyta; Tracheophyta; Spermatophyta; Magnoliophyta; eudicotyledons; Gunneridae; Pentapetalae; rosids; malvids; Brassicales; Brassicaceae; Camelineae; Arabidopsis	1;1	1;1	1;1	;	2	1	1	1	0	1	0	0	1	0	0	1	0	8.7	8.7	8.7	16.428	150	150;262	0.0070671	5.9596		By MS/MS		0	8.7	0	780750	0	780750	0	0	355830	0	0	1	0	1
Specific	c160537/1/1467|m.65647;c166344/1/1607|m.70045	c160537/1/1467|m.65647;c166344/1/1607|m.70045	c160537/1/1467|m.65647	WDR25_HUMAN^WDR25_HUMAN^Q:10-297,H:234-523^37.113%ID^E:1.71e-70^RecName: Full=WD repeat-containing protein 25;^Eukaryota; Metazoa; Chordata; Craniata; Vertebrata; Euteleostomi; Mammalia; Eutheria; Euarchontoglires; Primates; Haplorrhini; Catarrhini; Hominidae; Homo	1;1	1;1	1;1	;	2	1	1	1	1	0	0	1	0	0	1	0	0	7.6	7.6	7.6	33.962	302	302;437	0.011628	5.9596	By MS/MS			7.6	0	0	0	0	0	0	0	0	0	1	0	0	1
Specific	c169623/1/2150|m.72590;c33197/1/1894|m.21801	c169623/1/2150|m.72590;c33197/1/1894|m.21801	c169623/1/2150|m.72590	Y1790_ARATH^Y1790_ARATH^Q:1-192,H:431-630^62.687%ID^E:7.03e-74^RecName: Full=BTB/POZ domain-containing protein At1g67900;^Eukaryota; Viridiplantae; Streptophyta; Embryophyta; Tracheophyta; Spermatophyta; Magnoliophyta; eudicotyledons; Gunneridae; Pentapetalae; rosids; malvids; Brassicales; Brassicaceae; Camelineae; Arabidopsis	1;1	1;1	1;1	;	2	1	1	1	0	1	1	0	1	1	0	1	1	6.8	6.8	6.8	21.38	192	192;359	0.036364	6.2913		By MS/MS	By matching	0	6.8	6.8	10249000	0	8267200	1982200	0	0	3827200	0	1	0	1
Specific	c28381/1/1439|m.18061;c156956/4/1729|m.62834	c28381/1/1439|m.18061;c156956/4/1729|m.62834	c28381/1/1439|m.18061	Y3720_ARATH^Y3720_ARATH^Q:4-318,H:63-394^34.421%ID^E:2.6e-55^RecName: Full=UPF0481 protein At3g47200;^Eukaryota; Viridiplantae; Streptophyta; Embryophyta; Tracheophyta; Spermatophyta; Magnoliophyta; eudicotyledons; Gunneridae; Pentapetalae; rosids; malvids; Brassicales; Brassicaceae; Camelineae; Arabidopsis	1;1	1;1	1;1	;	2	1	1	1	1	0	1	1	0	1	1	0	1	3.2	3.2	3.2	46.231	402	402;473	0.011976	5.9596	By MS/MS		By matching	3.2	0	3.2	5475800	745650	0	4730100	0	0	1483900	1	0	0	1
Specific	c118774/1/1533|m.52934;c112423/1/2011|m.48227	c118774/1/1533|m.52934;c112423/1/2011|m.48227	c118774/1/1533|m.52934	Y4265_ARATH^Y4265_ARATH^Q:20-105,H:651-737^47.126%ID^E:2.97e-13^RecName: Full=Probable LRR receptor-like serine/threonine-protein kinase At4g26540;^Eukaryota; Viridiplantae; Streptophyta; Embryophyta; Tracheophyta; Spermatophyta; Magnoliophyta; eudicotyledons; Gunneridae; Pentapetalae; rosids; malvids; Brassicales; Brassicaceae; Camelineae; Arabidopsis	1;1	1;1	1;1	;	2	1	1	1	1	0	0	1	0	0	1	0	0	21.9	21.9	21.9	11.67	105	105;490	0.017391	5.9596	By MS/MS			21.9	0	0	0	0	0	0	0	0	0	2	0	0	2
Specific	c122387/1/1551|m.55636;c249421/1/1990|m.93898	c122387/1/1551|m.55636;c249421/1/1990|m.93898	c122387/1/1551|m.55636	YCF2_SPIOL^YCF2_SPIOL^Q:1-116,H:1867-1982^90.517%ID^E:1.86e-68^RecName: Full=Protein Ycf2;^Eukaryota; Viridiplantae; Streptophyta; Embryophyta; Tracheophyta; Spermatophyta; Magnoliophyta; eudicotyledons; Gunneridae; Pentapetalae; Caryophyllales; Amaranthaceae; Chenopodioideae; Anserineae; Spinacia	1;1	1;1	1;1	;	2	1	1	1	0	0	1	0	0	1	0	0	1	12	12	12	14.138	117	117;562	0.03125	6.1065			By MS/MS	0	0	12	160550	0	0	160550	0	0	50367	0	0	1	1
Specific	c168746/1/1868|m.71905;c120278/1/1388|m.54071	c168746/1/1868|m.71905;c120278/1/1388|m.54071	c168746/1/1868|m.71905	ILVH_NICPL^ILVH_NICPL^Q:1-131,H:81-211^77.863%ID^E:3.64e-68^RecName: Full=Acetolactate synthase small subunit 1, chloroplastic;^Eukaryota; Viridiplantae; Streptophyta; Embryophyta; Tracheophyta; Spermatophyta; Magnoliophyta; eudicotyledons; Gunneridae; Pentapetalae; asterids; lamiids; Solanales; Solanaceae; Nicotianoideae; Nicotianeae; Nicotiana`ILVH_NICPL^ILVH_NICPL^Q:1-89,H:316-404^43.82%ID^E:1…	1;1	1;1	1;1	;	2	1	1	1	0	0	1	0	0	1	0	0	1	7	7	7	19.61	172	172;172	0.041667	6.8531			By MS/MS	0	0	7	1176900	0	0	1176900	0	0	2955000	0	0	1	1
Specific	c9426/1/1515|m.9091;c169117/1/2138|m.72179	c9426/1/1515|m.9091;c169117/1/2138|m.72179	c9426/1/1515|m.9091	.	1;1	1;1	1;1	;	2	1	1	1	1	1	0	1	1	0	1	1	0	3.9	3.9	3.9	20.011	181	181;369	0.010526	5.9596	By matching	By MS/MS		3.9	3.9	0	6735300	1847300	4888000	0	0	2227700	0	0	1	0	1
Specific	c237373/3/1570|m.91055;c253757/1/1734|m.97185	c237373/3/1570|m.91055;c253757/1/1734|m.97185	c237373/3/1570|m.91055	.	1;1	1;1	1;1	;	2	1	1	1	1	0	0	1	0	0	1	0	0	10.8	10.8	10.8	24.084	213	213;376	0.0085837	5.9596	By MS/MS			10.8	0	0	0	0	0	0	0	0	0	1	0	0	1
Specific	c204770/1/744|m.80088;c303571/1/606|m.28296	c204770/1/744|m.80088;c303571/1/606|m.28296	c204770/1/744|m.80088	RL34_TOBAC^RL34_TOBAC^Q:1-119,H:1-119^94.958%ID^E:6.29e-77^RecName: Full=60S ribosomal protein L34;^Eukaryota; Viridiplantae; Streptophyta; Embryophyta; Tracheophyta; Spermatophyta; Magnoliophyta; eudicotyledons; Gunneridae; Pentapetalae; asterids; lamiids; Solanales; Solanaceae; Nicotianoideae; Nicotianeae; Nicotiana	1;1	1;1	1;1	;	2	1	1	1	1	0	0	1	0	0	1	0	0	5.7	5.7	5.7	13.948	122	122;132	0.019417	5.9602	By MS/MS			5.7	0	0	491960	491960	0	0	240460	0	0	0	0	0	0
Specific	c201445/2/1423|m.77427;c5514/5/1568|m.5428	c201445/2/1423|m.77427;c5514/5/1568|m.5428	c201445/2/1423|m.77427	ZN622_MOUSE^ZN622_MOUSE^Q:118-336,H:251-464^36.283%ID^E:1.8e-28^RecName: Full=Zinc finger protein 622;^Eukaryota; Metazoa; Chordata; Craniata; Vertebrata; Euteleostomi; Mammalia; Eutheria; Euarchontoglires; Glires; Rodentia; Sciurognathi; Muroidea; Muridae; Murinae; Mus; Mus	1;1	1;1	1;1	;	2	1	1	1	1	0	1	1	0	1	1	0	1	3.2	3.2	3.2	39.526	346	346;410	0.04	6.5451	By MS/MS		By matching	3.2	0	3.2	16580000	5093900	0	11486000	0	0	3603200	0	0	0	0
Specific	CON__Q3MHN5;CON__ENSEMBL:ENSBTAP00000018229	CON__Q3MHN5;CON__ENSEMBL:ENSBTAP00000018229	CON__Q3MHN5	#N/A	1;1	1;1	1;1	;	2	1	1	1	1	1	0	1	1	0	1	1	0	1.5	1.5	1.5	53.341	474	474;475	0.034483	6.2408	By matching	By MS/MS		1.5	1.5	0	19897000	3782100	16114000	0	4362000	0	0	0	0	0	0			+
Specific	c63403/2/1933|m.32980;c121950/1/1273|m.55325;c126159/1/1804|m.58387	c63403/2/1933|m.32980;c121950/1/1273|m.55325;c126159/1/1804|m.58387	c63403/2/1933|m.32980	.	1;1;1	1;1;1	1;1;1	;;	3	1	1	1	1	0	0	1	0	0	1	0	0	9.1	9.1	9.1	28.096	254	254;349;352	0.013986	5.9596	By MS/MS			9.1	0	0	0	0	0	0	0	0	0	1	0	0	1
Specific	c203532/1/1373|m.79140;c75470/1/1764|m.42255;c25376/2/1652|m.15800	c203532/1/1373|m.79140;c75470/1/1764|m.42255;c25376/2/1652|m.15800	c203532/1/1373|m.79140	CLPX_MARHV^CLPX_MARHV^Q:1-202,H:217-408^49.505%ID^E:1.62e-61^RecName: Full=ATP-dependent Clp protease ATP-binding subunit ClpX {ECO:0000255|HAMAP-Rule:MF_00175};^Bacteria; Proteobacteria; Gammaproteobacteria; Alteromonadales; Alteromonadaceae; Marinobacter	1;1;1	1;1;1	1;1;1	;;	3	1	1	1	0	0	1	0	0	1	0	0	1	2.8	2.8	2.8	26.802	247	247;311;351	0.0096154	5.9596			By MS/MS	0	0	2.8	647610	0	0	647610	0	0	2092300	0	0	1	1
Specific	c246659/1/1762|m.91957;c259979/1/1690|m.101804;c204077/1/1684|m.79552	c246659/1/1762|m.91957;c259979/1/1690|m.101804;c204077/1/1684|m.79552	c246659/1/1762|m.91957	CSE_ARATH^CSE_ARATH^Q:149-424,H:39-322^31.818%ID^E:6.79e-36^RecName: Full=Caffeoylshikimate esterase;^Eukaryota; Viridiplantae; Streptophyta; Embryophyta; Tracheophyta; Spermatophyta; Magnoliophyta; eudicotyledons; Gunneridae; Pentapetalae; rosids; malvids; Brassicales; Brassicaceae; Camelineae; Arabidopsis	1;1;1	1;1;1	1;1;1	;;	3	1	1	1	0	1	0	0	1	0	0	1	0	1.6	1.6	1.6	47.062	428	428;456;457	0.0095694	5.9596		By MS/MS		0	1.6	0	2698700	0	2698700	0	0	1229900	0	0	1	0	1
Specific	c5670/4/1498|m.5571;c167694/4/1559|m.71086;c14716/5/1578|m.13645	c5670/4/1498|m.5571;c167694/4/1559|m.71086;c14716/5/1578|m.13645	c5670/4/1498|m.5571	FB345_ARATH^FB345_ARATH^Q:6-308,H:2-308^53.094%ID^E:2.1e-106^RecName: Full=F-box protein At4g00755;^Eukaryota; Viridiplantae; Streptophyta; Embryophyta; Tracheophyta; Spermatophyta; Magnoliophyta; eudicotyledons; Gunneridae; Pentapetalae; rosids; malvids; Brassicales; Brassicaceae; Camelineae; Arabidopsis	1;1;1	1;1;1	1;1;1	;;	3	1	1	1	0	0	1	0	0	1	0	0	1	6.1	6.1	6.1	42.294	376	376;376;379	0.012346	5.9596			By MS/MS	0	0	6.1	0	0	0	0	0	0	0	0	0	3	3
Specific	c305042/1/1324|m.28977;c70621/1/1899|m.38451;c302254/1/1667|m.27578	c305042/1/1324|m.28977;c70621/1/1899|m.38451;c302254/1/1667|m.27578	c305042/1/1324|m.28977	GPAT6_ARATH^GPAT6_ARATH^Q:1-285,H:166-453^80.556%ID^E:2.49e-161^RecName: Full=Glycerol-3-phosphate 2-O-acyltransferase 6;^Eukaryota; Viridiplantae; Streptophyta; Embryophyta; Tracheophyta; Spermatophyta; Magnoliophyta; eudicotyledons; Gunneridae; Pentapetalae; rosids; malvids; Brassicales; Brassicaceae; Camelineae; Arabidopsis	1;1;1	1;1;1	1;1;1	;;	3	1	1	1	1	0	0	1	0	0	1	0	0	7.4	7.4	7.4	34.339	309	309;398;449	0.0072202	5.9596	By MS/MS			7.4	0	0	0	0	0	0	0	0	0	1	0	0	1
Specific	c63317/1/1328|m.32920;c207729/1/1327|m.82469;c110712/4/1440|m.46744	c63317/1/1328|m.32920;c207729/1/1327|m.82469;c110712/4/1440|m.46744	c63317/1/1328|m.32920	IQD14_ARATH^IQD14_ARATH^Q:36-135,H:299-388^36%ID^E:7.61e-13^RecName: Full=Protein IQ-DOMAIN 14;^Eukaryota; Viridiplantae; Streptophyta; Embryophyta; Tracheophyta; Spermatophyta; Magnoliophyta; eudicotyledons; Gunneridae; Pentapetalae; rosids; malvids; Brassicales; Brassicaceae; Camelineae; Arabidopsis	1;1;1	1;1;1	1;1;1	;;	3	1	1	1	0	0	1	0	0	1	0	0	1	4.9	4.9	4.9	16.523	144	144;169;309	0.018349	5.9596			By MS/MS	0	0	4.9	19823000	0	0	19823000	0	0	40184000	0	0	1	1
Specific	c27995/1/1283|m.17756;c306322/1/1358|m.29544;c251397/1/1360|m.95386	c27995/1/1283|m.17756;c306322/1/1358|m.29544;c251397/1/1360|m.95386	c27995/1/1283|m.17756	LPP2_ARATH^LPP2_ARATH^Q:1-98,H:148-245^79.592%ID^E:3e-52^RecName: Full=Lipid phosphate phosphatase 2;^Eukaryota; Viridiplantae; Streptophyta; Embryophyta; Tracheophyta; Spermatophyta; Magnoliophyta; eudicotyledons; Gunneridae; Pentapetalae; rosids; malvids; Brassicales; Brassicaceae; Camelineae; Arabidopsis	1;1;1	1;1;1	1;1;1	;;	3	1	1	1	1	1	1	1	1	1	1	1	1	4.4	4.4	4.4	18.607	160	160;323;323	0.0082305	5.9596	By matching	By matching	By MS/MS	4.4	4.4	4.4	209930000	78866000	15509000	115560000	0	0	234250000	0	0	1	1
Specific	c206228/1/1849|m.81279;c121951/1/2462|m.55327;c119613/1/1953|m.53597	c206228/1/1849|m.81279;c121951/1/2462|m.55327;c119613/1/1953|m.53597	c206228/1/1849|m.81279	NADK1_ARATH^NADK1_ARATH^Q:1-285,H:234-518^78.947%ID^E:1.25e-167^RecName: Full=NAD(H) kinase 1;^Eukaryota; Viridiplantae; Streptophyta; Embryophyta; Tracheophyta; Spermatophyta; Magnoliophyta; eudicotyledons; Gunneridae; Pentapetalae; rosids; malvids; Brassicales; Brassicaceae; Camelineae; Arabidopsis	1;1;1	1;1;1	1;1;1	;;	3	1	1	1	1	1	0	1	1	0	1	1	0	2.4	2.4	2.4	32.449	291	291;291;314	0.014599	5.9596	By MS/MS	By matching		2.4	2.4	0	4640700	1552200	3088500	0	5115700	0	0	1	0	0	1
Specific	c68564/1/1249|m.36857;c213781/2/1692|m.87222;c209578/2/1560|m.83898	c68564/1/1249|m.36857;c213781/2/1692|m.87222;c209578/2/1560|m.83898	c68564/1/1249|m.36857	PDCD2_BOVIN^PDCD2_BOVIN^Q:35-123,H:256-338^40.449%ID^E:2.96e-15^RecName: Full=Programmed cell death protein 2;^Eukaryota; Metazoa; Chordata; Craniata; Vertebrata; Euteleostomi; Mammalia; Eutheria; Laurasiatheria; Cetartiodactyla; Ruminantia; Pecora; Bovidae; Bovinae; Bos	1;1;1	1;1;1	1;1;1	;;	3	1	1	1	0	1	1	0	1	1	0	1	1	6.3	6.3	6.3	14.398	126	126;296;417	0.064516	9.6166		By MS/MS	By MS/MS	0	6.3	6.3	783990000	0	654380000	129610000	0	275610000	0	0	5	2	7
Specific	c168963/1/1140|m.72073;c211749/1/1539|m.85640;c65655/2/1805|m.34717	c168963/1/1140|m.72073;c211749/1/1539|m.85640;c65655/2/1805|m.34717	c168963/1/1140|m.72073	RPD1_ARATH^RPD1_ARATH^Q:51-320,H:67-359^30.508%ID^E:1.1e-30^RecName: Full=Protein ROOT PRIMORDIUM DEFECTIVE 1;^Eukaryota; Viridiplantae; Streptophyta; Embryophyta; Tracheophyta; Spermatophyta; Magnoliophyta; eudicotyledons; Gunneridae; Pentapetalae; rosids; malvids; Brassicales; Brassicaceae; Camelineae; Arabidopsis	1;1;1	1;1;1	1;1;1	;;	3	1	1	1	0	1	1	0	1	1	0	1	1	2.2	2.2	2.2	38.165	325	325;386;415	0.010638	5.9596		By matching	By MS/MS	0	2.2	2.2	8996400	0	5698800	3297600	0	0	10429000	0	0	1	1
Specific	c168806/1/2090|m.71955;c12614/1/1553|m.11871;c260941/1/1662|m.102552	c168806/1/2090|m.71955;c12614/1/1553|m.11871;c260941/1/1662|m.102552	c168806/1/2090|m.71955	SYV_ARATH^SYV_ARATH^Q:1-305,H:499-803^75.738%ID^E:1.49e-172^RecName: Full=Valine--tRNA ligase;^Eukaryota; Viridiplantae; Streptophyta; Embryophyta; Tracheophyta; Spermatophyta; Magnoliophyta; eudicotyledons; Gunneridae; Pentapetalae; rosids; malvids; Brassicales; Brassicaceae; Camelineae; Arabidopsis	1;1;1	1;1;1	1;1;1	;;	3	1	1	1	1	0	0	1	0	0	1	0	0	2.6	2.6	2.6	35.777	308	308;431;463	0.05	7.0244	By MS/MS			2.6	0	0	39709000	39709000	0	0	39709000	0	0	1	0	0	1
Specific	c15102/1/1886|m.13995;c257301/1/1367|m.99866;c203315/2/2181|m.78981	c15102/1/1886|m.13995;c257301/1/1367|m.99866;c203315/2/2181|m.78981	c15102/1/1886|m.13995	YSL3_ARATH^YSL3_ARATH^Q:1-254,H:1-256^59.387%ID^E:4.43e-95^RecName: Full=Metal-nicotianamine transporter YSL3;^Eukaryota; Viridiplantae; Streptophyta; Embryophyta; Tracheophyta; Spermatophyta; Magnoliophyta; eudicotyledons; Gunneridae; Pentapetalae; rosids; malvids; Brassicales; Brassicaceae; Camelineae; Arabidopsis	1;1;1	1;1;1	1;1;1	;;	3	1	1	1	1	1	1	1	1	1	1	1	1	2.6	2.6	2.6	29.267	265	265;320;380	0.01227	5.9596	By matching	By matching	By MS/MS	2.6	2.6	2.6	36189000	13927000	2308500	19954000	0	0	40364000	0	0	1	1
Specific	c259849/1/1517|m.101724;c70306/1/1265|m.38224;c117663/4/1290|m.52072	c259849/1/1517|m.101724;c70306/1/1265|m.38224;c117663/4/1290|m.52072	c259849/1/1517|m.101724	.	1;1;1	1;1;1	1;1;1	;;	3	1	1	1	0	0	1	0	0	1	0	0	1	17.7	17.7	17.7	14.515	130	130;185;229	0.014925	5.9596			By MS/MS	0	0	17.7	0	0	0	0	0	0	0	0	0	1	1
Specific	c257228/1/1199|m.99813;c11703/1/1690|m.11100;c171664/1/2134|m.74171	c257228/1/1199|m.99813;c11703/1/1690|m.11100;c171664/1/2134|m.74171	c257228/1/1199|m.99813	ARFF_ARATH^ARFF_ARATH^Q:1-176,H:720-897^62.5%ID^E:2.1e-60^RecName: Full=Auxin response factor 6;^Eukaryota; Viridiplantae; Streptophyta; Embryophyta; Tracheophyta; Spermatophyta; Magnoliophyta; eudicotyledons; Gunneridae; Pentapetalae; rosids; malvids; Brassicales; Brassicaceae; Camelineae; Arabidopsis	1;1;1	1;1;1	1;1;1	;;	3	1	1	1	1	0	0	1	0	0	1	0	0	12.2	12.2	12.2	21.328	189	189;315;525	0.015152	5.9596	By MS/MS			12.2	0	0	0	0	0	0	0	0	0	1	0	0	1
Specific	c126313/1/898|m.58511;c31478/1/1561|m.20516;c206276/1/1266|m.81318	c126313/1/898|m.58511;c31478/1/1561|m.20516;c206276/1/1266|m.81318	c126313/1/898|m.58511	.	1;1;1	1;1;1	1;1;1	;;	3	1	1	1	1	0	1	1	0	1	1	0	1	22.8	22.8	22.8	11.851	101	101;220;225	0.013245	5.9596	By MS/MS		By MS/MS	22.8	0	22.8	0	0	0	0	0	0	0	2	0	1	3
Specific	c261607/1/1439|m.103097;c157289/2/1614|m.63095;c63158/1/1852|m.32814	c261607/1/1439|m.103097;c157289/2/1614|m.63095;c63158/1/1852|m.32814	c261607/1/1439|m.103097	.	1;1;1	1;1;1	1;1;1	;;	3	1	1	1	1	0	0	1	0	0	1	0	0	7.8	7.8	7.8	33.247	296	296;486;551	0.011905	5.9596	By MS/MS			7.8	0	0	0	0	0	0	0	0	0	1	0	0	1
Specific	c250676/1/1797|m.94849;c61394/1/1906|m.31386;c67935/1/1806|m.36375	c250676/1/1797|m.94849;c61394/1/1906|m.31386;c67935/1/1806|m.36375	c250676/1/1797|m.94849	.	1;1;1	1;1;1	1;1;1	;;	3	1	1	1	0	0	1	0	0	1	0	0	1	11.2	11.2	11.2	23.632	206	206;348;426	0.0082645	5.9596			By MS/MS	0	0	11.2	0	0	0	0	0	0	0	0	0	1	1
Specific	c300975/1/1612|m.26974;c29205/1/2009|m.18698;c76763/3/1879|m.43716	c300975/1/1612|m.26974;c29205/1/2009|m.18698;c76763/3/1879|m.43716	c300975/1/1612|m.26974	.	1;1;1	1;1;1	1;1;1	;;	3	1	1	1	1	0	1	1	0	1	1	0	1	14	14	14	13.049	114	114;303;494	0.028571	6.0578	By MS/MS		By matching	14	0	14	3085900	793270	0	2292600	0	0	512500	1	0	0	1
Specific	c75241/1/1465|m.42085;c32381/1/1708|m.21225;c115402/4/1872|m.50360	c75241/1/1465|m.42085;c32381/1/1708|m.21225;c115402/4/1872|m.50360	c75241/1/1465|m.42085	. hypothetical protein CICLE_v10031670mg [Citrus clementina], lysine ketoglutarate reductase trans-splicing protein [Medicago truncatula], DUF707	1;1;1	1;1;1	1;1;1	;;	3	1	1	1	0	0	1	0	0	1	0	0	1	6.8	6.8	6.8	38.362	336	336;443;444	0.016129	5.9596			By MS/MS	0	0	6.8	0	0	0	0	0	0	0	0	0	1	1
Specific	c9646/1/1820|m.9286;c165567/1/1615|m.69455;c300577/1/1447|m.26800	c9646/1/1820|m.9286;c165567/1/1615|m.69455;c300577/1/1447|m.26800	c9646/1/1820|m.9286	. hypothetical protein CICLE_v10031670mg [Citrus clementina], lysine ketoglutarate reductase trans-splicing protein [Medicago truncatula], DUF707	1;1;1	1;1;1	1;1;1	;;	3	1	1	1	0	0	1	0	0	1	0	0	1	2.3	2.3	2.3	41.115	355	355;366;375	0.040816	6.5723			By MS/MS	0	0	2.3	9412600	0	0	9412600	0	0	2459800	0	0	1	1
Specific	c72548/3/1472|m.40050;c5606/4/1519|m.5520;c9330/3/1344|m.9006	c72548/3/1472|m.40050;c5606/4/1519|m.5520;c9330/3/1344|m.9006	c72548/3/1472|m.40050	. hypothetical protein SOVF_114950 [Spinacia oleracea]DUF1517^69%^E:0	1;1;1	1;1;1	1;1;1	;;	3	1	1	1	0	1	0	0	1	0	0	1	0	2.2	2.2	2.2	43.707	403	403;403;416	0.027027	6.0271		By MS/MS		0	2.2	0	11733000	0	11733000	0	0	3296300	0	0	2	0	2
Specific	c34571/1/1380|m.23089;c259693/1/1402|m.101618;c204338/1/1766|m.79747;c248711/1/1452|m.93417	c34571/1/1380|m.23089;c259693/1/1402|m.101618;c204338/1/1766|m.79747;c248711/1/1452|m.93417	c34571/1/1380|m.23089	HSP7O_ARATH^HSP7O_ARATH^Q:1-119,H:120-238^91.597%ID^E:5.71e-74^RecName: Full=Heat shock 70 kDa protein 14;^Eukaryota; Viridiplantae; Streptophyta; Embryophyta; Tracheophyta; Spermatophyta; Magnoliophyta; eudicotyledons; Gunneridae; Pentapetalae; rosids; malvids; Brassicales; Brassicaceae; Camelineae; Arabidopsis	1;1;1;1	1;1;1;1	1;1;1;1	;;;	4	1	1	1	1	0	0	1	0	0	1	0	0	15.2	15.2	15.2	16.497	151	151;168;218;393	0.0095238	5.9596	By MS/MS			15.2	0	0	0	0	0	0	0	0	0	1	0	0	1
Specific	c16496/4/1483|m.14164;NrNep3;c218739/9/1470|m.89940;c165535/1/1551|m.69432	c16496/4/1483|m.14164;NrNep3;c218739/9/1470|m.89940;c165535/1/1551|m.69432	c16496/4/1483|m.14164	NEP1_NEPGR^NEP1_NEPGR^Q:1-306,H:97-399^53.674%ID^E:1.76e-91^RecName: Full=Aspartic proteinase nepenthesin-1;^Eukaryota; Viridiplantae; Streptophyta; Embryophyta; Tracheophyta; Spermatophyta; Magnoliophyta; eudicotyledons; Gunneridae; Pentapetalae; Caryophyllales; Nepenthaceae; Nepenthes	1;1;1;1	1;1;1;1	1;1;1;1	;;;	4	1	1	1	1	0	0	1	0	0	1	0	0	3.7	3.7	3.7	35.022	321	321;442;442;442	0	27.134	By MS/MS			3.7	0	0	17512000	17512000	0	0	9940900	0	0	6	0	0	6
Specific	c8436/4/1474|m.8175;c42636/7/1618|m.28861;c263341/1/1645|m.29524;c23961/7/1609|m.14519	c8436/4/1474|m.8175;c42636/7/1618|m.28861;c263341/1/1645|m.29524;c23961/7/1609|m.14519	c8436/4/1474|m.8175	Y5713_ARATH^Y5713_ARATH^Q:26-359,H:35-368^57.186%ID^E:3.25e-145^RecName: Full=PI-PLC X domain-containing protein At5g67130;^Eukaryota; Viridiplantae; Streptophyta; Embryophyta; Tracheophyta; Spermatophyta; Magnoliophyta; eudicotyledons; Gunneridae; Pentapetalae; rosids; malvids; Brassicales; Brassicaceae; Camelineae; Arabidopsis	1;1;1;1	1;1;1;1	1;1;1;1	;;;	4	1	1	1	0	0	1	0	0	1	0	0	1	2.8	2.8	2.8	46.055	423	423;423;423;423	0	123.53			By MS/MS	0	0	2.8	11596000	0	0	11596000	0	0	3284100	0	0	9	9
Specific	c65304/1/1540|m.34415;c209561/1/1691|m.83885;c253813/1/1857|m.97225;c116142/1/1566|m.50968	c65304/1/1540|m.34415;c209561/1/1691|m.83885;c253813/1/1857|m.97225;c116142/1/1566|m.50968	c65304/1/1540|m.34415	HMGCL_ARATH^HMGCL_ARATH^Q:2-170,H:75-244^54.857%ID^E:4.32e-52^RecName: Full=Hydroxymethylglutaryl-CoA lyase, mitochondrial;^Eukaryota; Viridiplantae; Streptophyta; Embryophyta; Tracheophyta; Spermatophyta; Magnoliophyta; eudicotyledons; Gunneridae; Pentapetalae; rosids; malvids; Brassicales; Brassicaceae; Camelineae; Arabidopsis	1;1;1;1	1;1;1;1	1;1;1;1	;;;	4	1	1	1	0	0	1	0	0	1	0	0	1	13.5	13.5	13.5	19.201	170	170;232;320;432	0.015625	5.9596			By MS/MS	0	0	13.5	0	0	0	0	0	0	0	0	0	1	1
Specific	c338746/7/1771|m.75418;c120278/1/1388|m.54073;c75356/1/1065|m.42179;c70857/6/1687|m.38633	c338746/7/1771|m.75418;c120278/1/1388|m.54073;c75356/1/1065|m.42179;c70857/6/1687|m.38633	c338746/7/1771|m.75418	ILVH_NICPL^ILVH_NICPL^Q:1-96,H:200-294^68.75%ID^E:2.87e-36^RecName: Full=Acetolactate synthase small subunit 1, chloroplastic;^Eukaryota; Viridiplantae; Streptophyta; Embryophyta; Tracheophyta; Spermatophyta; Magnoliophyta; eudicotyledons; Gunneridae; Pentapetalae; asterids; lamiids; Solanales; Solanaceae; Nicotianoideae; Nicotianeae; Nicotiana	1;1;1;1	1;1;1;1	1;1;1;1	;;;	4	1	1	1	0	1	0	0	1	0	0	1	0	18.7	18.7	18.7	13.144	123	123;123;142;148	0.024691	5.994		By MS/MS		0	18.7	0	0	0	0	0	0	0	0	0	1	0	1
Specific	c62120/2/1354|m.32015;c111091/2/1205|m.47261;c110770/4/1348|m.46809;c165844/2/1314|m.69661	c62120/2/1354|m.32015;c111091/2/1205|m.47261;c110770/4/1348|m.46809;c165844/2/1314|m.69661	c62120/2/1354|m.32015	.	1;1;1;1	1;1;1;1	1;1;1;1	;;;	4	1	1	1	1	0	0	1	0	0	1	0	0	16.8	16.8	16.8	14.839	137	137;137;137;345	0.018182	5.9596	By MS/MS			16.8	0	0	0	0	0	0	0	0	0	1	0	0	1
Specific	c64545/1/1699|m.33813;c245576/4/1742|m.91268;c3237/1/1606|m.3376;c300574/1/2094|m.26799	c64545/1/1699|m.33813;c245576/4/1742|m.91268;c3237/1/1606|m.3376;c300574/1/2094|m.26799	c64545/1/1699|m.33813	GPT1_ARATH^GPT1_ARATH^Q:478-1011,H:88-265^82.022%ID^E:2.13e-83^RecName: Full=Glucose-6-phosphate/phosphate translocator 1, chloroplastic;^Eukaryota; Viridiplantae; Streptophyta; Embryophyta; Tracheophyta; Spermatophyta; Magnoliophyta; eudicotyledons; Gunneridae; Pentapetalae; rosids; malvids; Brassicales; Brassicaceae; Camelineae; Arabidopsis`GPT1_ARATH^GPT1_ARATH^Q:968-1330,H:251-387^81.752%ID^E…	1;1;1;1	1;1;1;1	1;1;1;1	;;;	4	1	1	1	1	0	0	1	0	0	1	0	0	6.4	6.4	6.4	12.282	109	109;129;175;194	0.021978	5.968	By MS/MS			6.4	0	0	2251000	2251000	0	0	1474900	0	0	0	0	0	0
Specific	c262479/1/2176|m.261;c307281/1/2114|m.29997;c258824/1/1983|m.100972;c208692/1/2090|m.83197	c262479/1/2176|m.261;c307281/1/2114|m.29997;c258824/1/1983|m.100972;c208692/1/2090|m.83197	c262479/1/2176|m.261	LCB1A_ORYSJ^LCB1A_ORYSJ^Q:51-135,H:191-275^77.647%ID^E:1.54e-42^RecName: Full=Long chain base biosynthesis protein 1a;^Eukaryota; Viridiplantae; Streptophyta; Embryophyta; Tracheophyta; Spermatophyta; Magnoliophyta; Liliopsida; Poales; Poaceae; BEP clade; Ehrhartoideae; Oryzeae; Oryza	1;1;1;1	1;1;1;1	1;1;1;1	;;;	4	1	1	1	1	0	0	1	0	0	1	0	0	4.9	4.9	4.9	16.658	143	143;180;293;395	0.035714	6.2893	By MS/MS			4.9	0	0	923500	923500	0	0	322360	0	0	0	0	0	0
Specific	c214788/1/2307|m.88016;c208722/1/2057|m.83217;c162962/1/1303|m.67482;c257528/1/1336|m.100029	c214788/1/2307|m.88016;c208722/1/2057|m.83217;c162962/1/1303|m.67482;c257528/1/1336|m.100029	c214788/1/2307|m.88016	Y4374_ARATH^Y4374_ARATH^Q:7-277,H:34-314^48.432%ID^E:4.88e-63^RecName: Full=Probable inactive receptor kinase At4g23740;^Eukaryota; Viridiplantae; Streptophyta; Embryophyta; Tracheophyta; Spermatophyta; Magnoliophyta; eudicotyledons; Gunneridae; Pentapetalae; rosids; malvids; Brassicales; Brassicaceae; Camelineae; Arabidopsis	1;1;1;1	1;1;1;1	1;1;1;1	;;;	4	1	1	1	1	1	0	1	1	0	1	1	0	2.3	2.3	2.3	32.617	302	302;338;340;400	0.054054	7.3374	By matching	By MS/MS		2.3	2.3	0	5246100	619770	4626400	0	0	913890	0	0	0	0	0
Specific	c168948/1/2090|m.72056;c61202/3/1414|m.31132;c340590/5/1854|m.45107;c130880/5/1904|m.60633;c154543/5/1924|m.61071	c168948/1/2090|m.72056;c61202/3/1414|m.31132;c340590/5/1854|m.45107;c130880/5/1904|m.60633;c154543/5/1924|m.61071	c168948/1/2090|m.72056	CGS1_ARATH^CGS1_ARATH^Q:1-97,H:405-501^80.412%ID^E:3.92e-48^RecName: Full=Cystathionine gamma-synthase 1, chloroplastic {ECO:0000305};^Eukaryota; Viridiplantae; Streptophyta; Embryophyta; Tracheophyta; Spermatophyta; Magnoliophyta; eudicotyledons; Gunneridae; Pentapetalae; rosids; malvids; Brassicales; Brassicaceae; Camelineae; Arabidopsis	1;1;1;1;1	1;1;1;1;1	1;1;1;1;1	;;;;	5	1	1	1	0	0	1	0	0	1	0	0	1	19	19	19	13.36	121	121;416;571;571;575	0.012658	5.9596			By MS/MS	0	0	19	0	0	0	0	0	0	0	0	0	1	1
Specific	c206318/3/1698|m.81340;c123416/1/1548|m.56377;c1760/6/1689|m.1938;c77317/1/1671|m.44304;c125461/1/1478|m.57862	c206318/3/1698|m.81340;c123416/1/1548|m.56377;c1760/6/1689|m.1938;c77317/1/1671|m.44304;c125461/1/1478|m.57862	c206318/3/1698|m.81340	DRB6_ORYSJ^DRB6_ORYSJ^Q:3-177,H:149-327^39.891%ID^E:4.31e-24^RecName: Full=Double-stranded RNA-binding protein 6;^Eukaryota; Viridiplantae; Streptophyta; Embryophyta; Tracheophyta; Spermatophyta; Magnoliophyta; Liliopsida; Poales; Poaceae; BEP clade; Ehrhartoideae; Oryzeae; Oryza	1;1;1;1;1	1;1;1;1;1	1;1;1;1;1	;;;;	5	1	1	1	1	0	0	1	0	0	1	0	0	3.9	3.9	3.9	22.2	207	207;352;353;363;399	0.028169	6.0467	By MS/MS			3.9	0	0	0	0	0	0	0	0	0	1	0	0	1
Specific	c69271/1/1366|m.37432;c73123/4/1538|m.40479;NrNep1;c62517/2/1578|m.32343;BAD07474.1	c69271/1/1366|m.37432;c73123/4/1538|m.40479;NrNep1;c62517/2/1578|m.32343;BAD07474.1	c69271/1/1366|m.37432	NEP1_NEPGR^NEP1_NEPGR^Q:1-118,H:221-342^77.049%ID^E:2.29e-53^RecName: Full=Aspartic proteinase nepenthesin-1;^Eukaryota; Viridiplantae; Streptophyta; Embryophyta; Tracheophyta; Spermatophyta; Magnoliophyta; eudicotyledons; Gunneridae; Pentapetalae; Caryophyllales; Nepenthaceae; Nepenthes	1;1;1;1;1	1;1;1;1;1	1;1;1;1;1	;;;;	5	1	1	1	1	0	1	1	0	1	1	0	1	9.9	9.9	9.9	14.633	131	131;316;437;437;437	0.066667	9.7091	By matching		By MS/MS	9.9	0	9.9	12681000	613520	0	12067000	0	0	3220500	0	0	3	3
Specific	c74853/1/1916|m.41783;c11025/3/1535|m.10502;c127906/1/1241|m.59721;c75830/1/1436|m.42673;c26316/5/1508|m.16459	c74853/1/1916|m.41783;c11025/3/1535|m.10502;c127906/1/1241|m.59721;c75830/1/1436|m.42673;c26316/5/1508|m.16459	c74853/1/1916|m.41783	SYT2_ARATH^SYT2_ARATH^Q:15-135,H:418-535^32%ID^E:7.01e-08^RecName: Full=Synaptotagmin-2;^Eukaryota; Viridiplantae; Streptophyta; Embryophyta; Tracheophyta; Spermatophyta; Magnoliophyta; eudicotyledons; Gunneridae; Pentapetalae; rosids; malvids; Brassicales; Brassicaceae; Camelineae; Arabidopsis	1;1;1;1;1	1;1;1;1;1	1;1;1;1;1	;;;;	5	1	1	1	0	1	0	0	1	0	0	1	0	5.1	5.1	5.1	14.931	136	136;309;318;368;402	0.018692	5.9596		By MS/MS		0	5.1	0	5237800	0	5237800	0	0	2387100	0	0	1	0	1
Specific	c72183/1/1415|m.39746;c303494/1/1875|m.28263;c24285/15/1329|m.14800;c62260/1/1451|m.32149;c35661/3/1605|m.24141;c120007/2/1324|m.53882	c72183/1/1415|m.39746;c303494/1/1875|m.28263;c24285/15/1329|m.14800;c62260/1/1451|m.32149;c35661/3/1605|m.24141;c120007/2/1324|m.53882	c72183/1/1415|m.39746	3HID1_ARATH^3HID1_ARATH^Q:87-346,H:72-331^72.692%ID^E:5.3e-133^RecName: Full=Probable 3-hydroxyisobutyrate dehydrogenase-like 1, mitochondrial;^Eukaryota; Viridiplantae; Streptophyta; Embryophyta; Tracheophyta; Spermatophyta; Magnoliophyta; eudicotyledons; Gunneridae; Pentapetalae; rosids; malvids; Brassicales; Brassicaceae; Camelineae; Arabidopsis	2;1;1;1;1;1	2;1;1;1;1;1	2;1;1;1;1;1	;;;;;	6	2	2	2	2	0	0	2	0	0	2	0	0	13.2	13.2	13.2	37.056	349	349;160;345;352;362;366	0	11.919	By MS/MS			13.2	0	0	0	0	0	0	0	0	0	2	0	0	2
Specific	c344855/10/1708|m.45377;c334441/3/1713|m.39850;c315914/10/1752|m.30623;c242563/2/1811|m.91138;c154407/30/1820|m.61021;c110648/31/1877|m.46691	c344855/10/1708|m.45377;c334441/3/1713|m.39850;c315914/10/1752|m.30623;c242563/2/1811|m.91138;c154407/30/1820|m.61021;c110648/31/1877|m.46691	c344855/10/1708|m.45377	APS1_ARATH^APS1_ARATH^Q:1-467,H:1-463^81.529%ID^E:0^RecName: Full=ATP sulfurylase 1, chloroplastic;^Eukaryota; Viridiplantae; Streptophyta; Embryophyta; Tracheophyta; Spermatophyta; Magnoliophyta; eudicotyledons; Gunneridae; Pentapetalae; rosids; malvids; Brassicales; Brassicaceae; Camelineae; Arabidopsis	1;1;1;1;1;1	1;1;1;1;1;1	1;1;1;1;1;1	;;;;;	6	1	1	1	1	0	0	1	0	0	1	0	0	2.4	2.4	2.4	52.479	467	467;467;467;467;467;467	0.027778	6.0458	By MS/MS			2.4	0	0	1958000	1958000	0	0	2721500	0	0	1	0	0	1
Specific	c210855/1/1441|m.84937;c112478/1/2048|m.48258;c164008/1/1329|m.68308;c14592/1/1443|m.13546;c259767/1/1451|m.101673;c27405/2/1736|m.17306	c210855/1/1441|m.84937;c112478/1/2048|m.48258;c164008/1/1329|m.68308;c14592/1/1443|m.13546;c259767/1/1451|m.101673;c27405/2/1736|m.17306	c210855/1/1441|m.84937	RGAP1_ARATH^RGAP1_ARATH^Q:9-142,H:87-220^85.075%ID^E:2.92e-79^RecName: Full=Rho GTPase-activating protein 1;^Eukaryota; Viridiplantae; Streptophyta; Embryophyta; Tracheophyta; Spermatophyta; Magnoliophyta; eudicotyledons; Gunneridae; Pentapetalae; rosids; malvids; Brassicales; Brassicaceae; Camelineae; Arabidopsis	1;1;1;1;1;1	1;1;1;1;1;1	1;1;1;1;1;1	;;;;;	6	1	1	1	1	0	0	1	0	0	1	0	0	16.2	16.2	16.2	16.156	142	142;219;343;377;430;471	0.017241	5.9596	By MS/MS			16.2	0	0	0	0	0	0	0	0	0	2	0	0	2
Specific	c302681/1/1668|m.27788;c257657/1/1234|m.100108;c117973/9/1322|m.52318;c11394/1/1514|m.10849;c296255/2/1275|m.91446;c976/15/1401|m.890	c302681/1/1668|m.27788;c257657/1/1234|m.100108;c117973/9/1322|m.52318;c11394/1/1514|m.10849;c296255/2/1275|m.91446;c976/15/1401|m.890	c302681/1/1668|m.27788	GDL83_ARATH^GDL83_ARATH^Q:7-187,H:4-187^48.913%ID^E:3.3e-53^RecName: Full=GDSL esterase/lipase At5g45910;^Eukaryota; Viridiplantae; Streptophyta; Embryophyta; Tracheophyta; Spermatophyta; Magnoliophyta; eudicotyledons; Gunneridae; Pentapetalae; rosids; malvids; Brassicales; Brassicaceae; Camelineae; Arabidopsis	1;1;1;1;1;1	1;1;1;1;1;1	1;1;1;1;1;1	;;;;;	6	1	1	1	1	0	0	1	0	0	1	0	0	12	12	12	21.354	191	191;343;370;370;389;399	0.016529	5.9596	By MS/MS			12	0	0	0	0	0	0	0	0	0	2	0	0	2
Specific	c69939/1/1341|m.37921;c127151/1/1522|m.59175;c120521/1/892|m.54237;c161086/1/1883|m.66067;c61077/8/1408|m.31023;c69752/2/1574|m.37795	c69939/1/1341|m.37921;c127151/1/1522|m.59175;c120521/1/892|m.54237;c161086/1/1883|m.66067;c61077/8/1408|m.31023;c69752/2/1574|m.37795	c69939/1/1341|m.37921	BPS1_ARATH^BPS1_ARATH^Q:2-140,H:155-296^47.887%ID^E:1.27e-33^RecName: Full=Protein BPS1, chloroplastic;^Eukaryota; Viridiplantae; Streptophyta; Embryophyta; Tracheophyta; Spermatophyta; Magnoliophyta; eudicotyledons; Gunneridae; Pentapetalae; rosids; malvids; Brassicales; Brassicaceae; Camelineae; Arabidopsis	1;1;1;1;1;1	1;1;1;1;1;1	1;1;1;1;1;1	;;;;;	6	1	1	1	1	0	0	1	0	0	1	0	0	8.4	8.4	8.4	16.965	154	154;168;282;310;344;360	0.014184	5.9596	By MS/MS			8.4	0	0	3723100	3723100	0	0	1299600	0	0	1	0	0	1
Specific	c76866/2/1535|m.43838;c199680/2/1631|m.75948;c28342/1/1473|m.18024;c261150/1/1468|m.102723;c6361/1/1652|m.6158;c698/11/1547|m.568;c7831/3/1518|m.7559	c76866/2/1535|m.43838;c199680/2/1631|m.75948;c28342/1/1473|m.18024;c261150/1/1468|m.102723;c6361/1/1652|m.6158;c698/11/1547|m.568;c7831/3/1518|m.7559	c76866/2/1535|m.43838	FDFT_NICBE^FDFT_NICBE^Q:1-152,H:259-410^73.026%ID^E:5.59e-68^RecName: Full=Squalene synthase;^Eukaryota; Viridiplantae; Streptophyta; Embryophyta; Tracheophyta; Spermatophyta; Magnoliophyta; eudicotyledons; Gunneridae; Pentapetalae; asterids; lamiids; Solanales; Solanaceae; Nicotianoideae; Nicotianeae; Nicotiana	1;1;1;1;1;1;1	1;1;1;1;1;1;1	1;1;1;1;1;1;1	;;;;;;	7	1	1	1	0	0	1	0	0	1	0	0	1	14.8	14.8	14.8	17.412	155	155;331;352;393;447;452;468	0.010204	5.9596			By MS/MS	0	0	14.8	0	0	0	0	0	0	0	0	0	1	1
Specific	c296208/5/2194|m.91206;c199579/2/2253|m.75822;c166062/1/1654|m.69829;c160226/2/1825|m.65414;c214033/1/1309|m.87423;c259620/1/1947|m.101577;c295634/1/2232|m.90702	c296208/5/2194|m.91206;c199579/2/2253|m.75822;c166062/1/1654|m.69829;c160226/2/1825|m.65414;c214033/1/1309|m.87423;c259620/1/1947|m.101577;c295634/1/2232|m.90702	c296208/5/2194|m.91206	FRL3_ARATH^FRL3_ARATH^Q:1-125,H:1-125^70.4%ID^E:2.22e-45^RecName: Full=FRIGIDA-like protein 3;^Eukaryota; Viridiplantae; Streptophyta; Embryophyta; Tracheophyta; Spermatophyta; Magnoliophyta; eudicotyledons; Gunneridae; Pentapetalae; rosids; malvids; Brassicales; Brassicaceae; Camelineae; Arabidopsis	1;1;1;1;1;1;1	1;1;1;1;1;1;1	1;1;1;1;1;1;1	;;;;;;	7	1	1	1	0	0	1	0	0	1	0	0	1	8.6	8.6	8.6	17.605	151	151;154;186;248;270;403;561	0.037037	6.4012			By MS/MS	0	0	8.6	9775600	0	0	9775600	0	0	24195000	0	0	4	4
Specific	c259034/1/1797|m.101141;c162981/2/1751|m.67498;c324448/2/1726|m.47714;c114955/1/1639|m.50021;c26962/1/1585|m.16983;c37396/2/1865|m.25814;c24518/2/1712|m.15080	c259034/1/1797|m.101141;c162981/2/1751|m.67498;c324448/2/1726|m.47714;c114955/1/1639|m.50021;c26962/1/1585|m.16983;c37396/2/1865|m.25814;c24518/2/1712|m.15080	c259034/1/1797|m.101141	Y1864_ARATH^Y1864_ARATH^Q:1-208,H:226-426^73.558%ID^E:8.33e-104^RecName: Full=Probable receptor-like protein kinase At1g80640;^Eukaryota; Viridiplantae; Streptophyta; Embryophyta; Tracheophyta; Spermatophyta; Magnoliophyta; eudicotyledons; Gunneridae; Pentapetalae; rosids; malvids; Brassicales; Brassicaceae; Camelineae; Arabidopsis	1;1;1;1;1;1;1	1;1;1;1;1;1;1	1;1;1;1;1;1;1	;;;;;;	7	1	1	1	1	0	0	1	0	0	1	0	0	10.5	10.5	10.5	24.133	219	219;219;383;407;445;448;448	0.01626	5.9596	By MS/MS			10.5	0	0	0	0	0	0	0	0	0	3	0	0	3
Specific	c248753/1/1450|m.93444;c69169/2/1896|m.37347;c215169/1/1377|m.88301;c115415/1/2120|m.50370;c202211/1/1513|m.78018;c166220/1/1702|m.69949;c246872/1/1748|m.92120	c248753/1/1450|m.93444;c69169/2/1896|m.37347;c215169/1/1377|m.88301;c115415/1/2120|m.50370;c202211/1/1513|m.78018;c166220/1/1702|m.69949;c246872/1/1748|m.92120	c248753/1/1450|m.93444	LST2_DANRE^LST2_DANRE^Q:165-233,H:891-960^51.429%ID^E:7.8e-15^RecName: Full=Lateral signaling target protein 2 homolog;^Eukaryota; Metazoa; Chordata; Craniata; Vertebrata; Euteleostomi; Actinopterygii; Neopterygii; Teleostei; Ostariophysi; Cypriniformes; Cyprinidae; Danio	1;1;1;1;1;1;1	1;1;1;1;1;1;1	1;1;1;1;1;1;1	;;;;;;	7	1	1	1	1	0	0	1	0	0	1	0	0	4.2	4.2	4.2	34.727	307	307;314;326;329;442;483;529	0.016	5.9596	By MS/MS			4.2	0	0	6161000	6161000	0	0	2150600	0	0	1	0	0	1
Specific	c157796/1/1200|m.63472;c69389/1/2082|m.37507;c259401/1/1267|m.101409;c255066/1/1521|m.98201;c207215/1/1230|m.82055;c124264/3/1368|m.57005;c123327/1/1293|m.56311	c157796/1/1200|m.63472;c69389/1/2082|m.37507;c259401/1/1267|m.101409;c255066/1/1521|m.98201;c207215/1/1230|m.82055;c124264/3/1368|m.57005;c123327/1/1293|m.56311	c157796/1/1200|m.63472	.	1;1;1;1;1;1;1	1;1;1;1;1;1;1	1;1;1;1;1;1;1	;;;;;;	7	1	1	1	1	0	0	1	0	0	1	0	0	12.6	12.6	12.6	19.9	182	182;325;325;325;325;325;325	0.013889	5.9596	By MS/MS			12.6	0	0	0	0	0	0	0	0	0	1	0	0	1
Specific	c116562/1/1335|m.51272;c207315/1/1457|m.82128;c2826/1/1441|m.2998;c166595/1/1769|m.70244;c260265/1/1354|m.102038;c246723/1/1364|m.92005;c33836/1/1530|m.22369;c199744/5/1806|m.76025;c1466/21/1673|m.1524	c116562/1/1335|m.51272;c207315/1/1457|m.82128;c2826/1/1441|m.2998;c166595/1/1769|m.70244;c260265/1/1354|m.102038;c246723/1/1364|m.92005;c33836/1/1530|m.22369;c199744/5/1806|m.76025;c1466/21/1673|m.1524	c116562/1/1335|m.51272	KCS21_ARATH^KCS21_ARATH^Q:35-98,H:17-81^55.385%ID^E:2.06e-19^RecName: Full=3-ketoacyl-CoA synthase 21;^Eukaryota; Viridiplantae; Streptophyta; Embryophyta; Tracheophyta; Spermatophyta; Magnoliophyta; eudicotyledons; Gunneridae; Pentapetalae; rosids; malvids; Brassicales; Brassicaceae; Camelineae; Arabidopsis	2;2;2;2;2;2;2;2;2	2;2;2;2;2;2;2;2;2	2;2;2;2;2;2;2;2;2	;;;;;;;;	9	2	2	2	1	0	2	1	0	2	1	0	2	15	15	15	11.73	100	100;184;218;274;297;301;438;458;458	0	12.523	By MS/MS		By MS/MS	13	0	15	27515000	3505900	0	24009000	0	0	6799200	0	0	1	1
Specific	CON__ENSEMBL:ENSBTAP00000038253;CON__Q9R0H5;CON__Q6NXH9;CON__P48668;CON__P04259;CON__P02538;CON__Q6IFZ6;CON__Q7Z794;CON__P19013	CON__ENSEMBL:ENSBTAP00000038253	CON__ENSEMBL:ENSBTAP00000038253	#N/A	3;1;1;1;1;1;1;1;1	1;0;0;1;1;1;0;0;1	0;0;0;0;0;0;0;0;0		9	3	1	0	2	1	2	1	0	0	0	0	0	5.4	1.5	0	63.165	606	606;524;539;564;564;564;572;578;594	0.026667	6.0229	By MS/MS	By matching	By matching	3.5	2	4	1710300	1710300	0	0	1148000	0	0	1	0	0	1			+
Specific	c207565/1/1687|m.82332;c254161/1/1733|m.97518;c344571/18/1784|m.45331;c303141/1/1630|m.28069;c620/6/1794|m.515;c338510/2/1794|m.43230;c301422/1/905|m.27190;c306568/1/1694|m.29677;c338265/24/1800|m.43011	c207565/1/1687|m.82332;c254161/1/1733|m.97518;c344571/18/1784|m.45331;c303141/1/1630|m.28069;c620/6/1794|m.515;c338510/2/1794|m.43230;c301422/1/905|m.27190;c306568/1/1694|m.29677;c338265/24/1800|m.43011	c207565/1/1687|m.82332	UXS4_ARATH^UXS4_ARATH^Q:778-1485,H:197-432^88.136%ID^E:7.32e-149^RecName: Full=UDP-glucuronic acid decarboxylase 4;^Eukaryota; Viridiplantae; Streptophyta; Embryophyta; Tracheophyta; Spermatophyta; Magnoliophyta; eudicotyledons; Gunneridae; Pentapetalae; rosids; malvids; Brassicales; Brassicaceae; Camelineae; Arabidopsis`UXS4_ARATH^UXS4_ARATH^Q:207-815,H:1-208^68.75%ID^E:4.64e-83^RecName: Full=UD…	1;1;1;1;1;1;1;1;1	1;1;1;1;1;1;1;1;1	1;1;1;1;1;1;1;1;1	;;;;;;;;	9	1	1	1	1	0	0	1	0	0	1	0	0	17.8	17.8	17.8	11.947	101	101;117;126;129;130;130;130;131;132	0.0093023	5.9596	By MS/MS			17.8	0	0	20763000	20763000	0	0	7247500	0	0	1	0	0	1
Specific	c33170/1/1469|m.21780;c254126/1/1646|m.97494;c61788/2/1249|m.31794;c201690/2/1415|m.77615;c255703/1/1794|m.98684;c71239/3/1903|m.38926;c5081/5/1838|m.4987;c335475/1/2013|m.74470;c1620/7/1928|m.1749	c33170/1/1469|m.21780;c254126/1/1646|m.97494;c61788/2/1249|m.31794;c201690/2/1415|m.77615;c255703/1/1794|m.98684;c71239/3/1903|m.38926;c5081/5/1838|m.4987;c335475/1/2013|m.74470;c1620/7/1928|m.1749	c33170/1/1469|m.21780	SYT5_ARATH^SYT5_ARATH^Q:1-130,H:1-131^42.748%ID^E:4.81e-29^RecName: Full=Synaptotagmin-5;^Eukaryota; Viridiplantae; Streptophyta; Embryophyta; Tracheophyta; Spermatophyta; Magnoliophyta; eudicotyledons; Gunneridae; Pentapetalae; rosids; malvids; Brassicales; Brassicaceae; Camelineae; Arabidopsis	1;1;1;1;1;1;1;1;1	1;1;1;1;1;1;1;1;1	1;1;1;1;1;1;1;1;1	;;;;;;;;	9	1	1	1	0	1	0	0	1	0	0	1	0	5.2	5.2	5.2	17.075	153	153;153;391;400;444;453;458;504;504	0.039216	6.5195		By MS/MS		0	5.2	0	24321000	0	24321000	0	0	4804400	0	0	0	0	0
Specific	c167748/1/1294|m.71128;c36428/4/1752|m.24863;c6593/3/1728|m.6378;c65415/1/1545|m.34512;c253218/1/1438|m.96796;c338158/70/1615|m.75014;c224082/13/1578|m.90428;c15208/3/1861|m.14088;c1360/6/1684|m.1391;c110367/16/1518|m.46643;c284474/6/1455|m.14423;c169708/1/1682|m.72654	c167748/1/1294|m.71128;c36428/4/1752|m.24863;c6593/3/1728|m.6378;c65415/1/1545|m.34512;c253218/1/1438|m.96796;c338158/70/1615|m.75014;c224082/13/1578|m.90428;c15208/3/1861|m.14088;c1360/6/1684|m.1391;c110367/16/1518|m.46643;c284474/6/1455|m.14423;c169708/1/1682|m.72654	c167748/1/1294|m.71128	RL4A_ARATH^RL4A_ARATH^Q:1-100,H:123-222^78%ID^E:6.42e-50^RecName: Full=60S ribosomal protein L4-1;^Eukaryota; Viridiplantae; Streptophyta; Embryophyta; Tracheophyta; Spermatophyta; Magnoliophyta; eudicotyledons; Gunneridae; Pentapetalae; rosids; malvids; Brassicales; Brassicaceae; Camelineae; Arabidopsis	1;1;1;1;1;1;1;1;1;1;1;1	1;1;1;1;1;1;1;1;1;1;1;1	1;1;1;1;1;1;1;1;1;1;1;1	;;;;;;;;;;;	12	1	1	1	1	0	0	1	0	0	1	0	0	6.9	6.9	6.9	10.988	101	101;113;252;367;376;407;407;407;407;407;427;434	0.018519	5.9596	By MS/MS			6.9	0	0	6810300	6810300	0	0	4111800	0	0	1	0	0	1
Specific	c120000/3/2193|m.53877;c304588/1/2188|m.28765;c156517/1/1139|m.62461;c122025/1/1815|m.55383;c3159/2/1640|m.3295;c3048/1/1245|m.3200;c155121/2/1401|m.61365;c72678/1/913|m.40142;c64311/1/1999|m.33650;c296443/1/2590|m.80961;c199824/1/2015|m.76118;c199982/1/1603|m.76249;c208683/1/2122|m.83189;c203665/2/1910|m.79241;c119148/1/1914|m.53218	c120000/3/2193|m.53877;c304588/1/2188|m.28765;c156517/1/1139|m.62461;c122025/1/1815|m.55383;c3159/2/1640|m.3295;c3048/1/1245|m.3200;c155121/2/1401|m.61365;c72678/1/913|m.40142;c64311/1/1999|m.33650;c296443/1/2590|m.80961;c199824/1/2015|m.76118;c199982/1/1603|m.76249;c208683/1/2122|m.83189;c203665/2/1910|m.79241;c119148/1/1914|m.53218	c120000/3/2193|m.53877	CYF_VITVI^CYF_VITVI^Q:1-131,H:1-131^93.13%ID^E:7.72e-86^RecName: Full=Apocytochrome f {ECO:0000255|HAMAP-Rule:MF_00610};^Eukaryota; Viridiplantae; Streptophyta; Embryophyta; Tracheophyta; Spermatophyta; Magnoliophyta; eudicotyledons; Gunneridae; Pentapetalae; rosids; Vitales; Vitaceae; Vitis	1;1;1;1;1;1;1;1;1;1;1;1;1;1;1	1;1;1;1;1;1;1;1;1;1;1;1;1;1;1	1;1;1;1;1;1;1;1;1;1;1;1;1;1;1	;;;;;;;;;;;;;;	15	1	1	1	0	1	0	0	1	0	0	1	0	17.6	17.6	17.6	14.593	131	131;178;178;178;212;212;212;222;226;226;231;241;320;320;320	0.014706	5.9596		By MS/MS		0	17.6	0	0	0	0	0	0	0	0	0	1	0	1
Specific	c160208/1/2502|m.65397;c9936/2/1673|m.9551;c254544/1/1926|m.97799;c256986/1/2007|m.99655;c77201/2/2271|m.44188;c252869/1/1456|m.96526;c128980/1/1653|m.60511;c263641/1/2300|m.8683;c295676/2/1434|m.22100;c249040/1/1219|m.93638;c256104/1/1221|m.98973;c112643/1/1451|m.48366;c216882/1/1289|m.89752;c302910/2/1274|m.91197;c63700/5/1560|m.33188;c164878/1/2081|m.68955;c214358/1/2070|m.87690	c160208/1/2502|m.65397;c9936/2/1673|m.9551;c254544/1/1926|m.97799;c256986/1/2007|m.99655;c77201/2/2271|m.44188;c252869/1/1456|m.96526;c128980/1/1653|m.60511;c263641/1/2300|m.8683;c295676/2/1434|m.22100;c249040/1/1219|m.93638;c256104/1/1221|m.98973;c112643/1/1451|m.48366;c216882/1/1289|m.89752;c302910/2/1274|m.91197;c63700/5/1560|m.33188;c164878/1/2081|m.68955;c214358/1/2070|m.87690	c160208/1/2502|m.65397	CESA8_ORYSJ^CESA8_ORYSJ^Q:25-422,H:684-1081^89.698%ID^E:0^RecName: Full=Probable cellulose synthase A catalytic subunit 8 [UDP-forming];^Eukaryota; Viridiplantae; Streptophyta; Embryophyta; Tracheophyta; Spermatophyta; Magnoliophyta; Liliopsida; Poales; Poaceae; BEP clade; Ehrhartoideae; Oryzeae; Oryza	2;1;1;1;1;1;1;1;1;1;1;1;1;1;1;1;1	2;1;1;1;1;1;1;1;1;1;1;1;1;1;1;1;1	2;1;1;1;1;1;1;1;1;1;1;1;1;1;1;1;1	;;;;;;;;;;;;;;;;	17	2	2	2	0	0	2	0	0	2	0	0	2	7.1	7.1	7.1	47.337	422	422;106;158;165;190;214;227;250;275;295;311;315;368;375;474;552;579	0	11.919			By MS/MS	0	0	7.1	8658500	0	0	8658500	0	0	21739000	0	0	2	2
Specific	c36495/1/1685|m.24930;c74060/1/1877|m.41180;c250592/1/1502|m.94785;c260388/2/1652|m.102138;c207558/1/1850|m.82325;c13422/2/1834|m.12549;c61413/6/2068|m.31412;c72486/1/1802|m.39998;c6961/1/1572|m.6770;c209761/1/1973|m.84055;c214355/1/1612|m.87686;c7762/7/1963|m.7504;c209685/1/1502|m.83998;c302174/1/1472|m.27522;c204975/1/1495|m.80263;c247971/1/1642|m.92875;c65526/4/1749|m.34607;c29361/7/1971|m.188…	c36495/1/1685|m.24930;c74060/1/1877|m.41180;c250592/1/1502|m.94785;c260388/2/1652|m.102138;c207558/1/1850|m.82325;c13422/2/1834|m.12549;c61413/6/2068|m.31412;c72486/1/1802|m.39998;c6961/1/1572|m.6770;c209761/1/1973|m.84055;c214355/1/1612|m.87686;c7762/7/1963|m.7504;c209685/1/1502|m.83998;c302174/1/1472|m.27522;c204975/1/1495|m.80263;c247971/1/1642|m.92875;c65526/4/1749|m.34607;c29361/7/1971|m.188…	c36495/1/1685|m.24930	6PGD1_SPIOL^6PGD1_SPIOL^Q:1-127,H:41-167^88.189%ID^E:5.88e-76^RecName: Full=6-phosphogluconate dehydrogenase, decarboxylating 1;^Eukaryota; Viridiplantae; Streptophyta; Embryophyta; Tracheophyta; Spermatophyta; Magnoliophyta; eudicotyledons; Gunneridae; Pentapetalae; Caryophyllales; Amaranthaceae; Chenopodioideae; Anserineae; Spinacia	1;1;1;1;1;1;1;1;1;1;1;1;1;1;1;1;1;1;1;1;1;1;1	1;1;1;1;1;1;1;1;1;1;1;1;1;1;1;1;1;1;1;1;1;1;1	1;1;1;1;1;1;1;1;1;1;1;1;1;1;1;1;1;1;1;1;1;1;1	;;;;;;;;;;;;;;;;;;;;;;	23	1	1	1	1	0	0	1	0	0	1	0	0	13.5	13.5	13.5	14.706	133	133;138;141;164;166;168;173;201;225;272;275;285;355;436;462;469;486;486;486;486;486;486;486	0.017857	5.9596	By MS/MS			13.5	0	0	6038000	6038000	0	0	2107600	0	0	1	0	0	1
Semispecific	BAM28606.1	BAM28606.1	BAM28606.1	b-1,3-Glucanase (Hatano and Hamada, 2008)	1	1	1		1	1	1	1	0	0	1	0	0	1	0	0	1	3.2	3.2	3.2	36.251	340	340	0	6.5112			By MS/MS	0	0	3.2	3937400	0	0	3937400	0	0	5364100	0	0	1	1
Semispecific	c113297/1/925|m.48841	c113297/1/925|m.48841	c113297/1/925|m.48841	PDCB3_ARATH^PDCB3_ARATH^Q:13-190,H:1-178^43.243%ID^E:2.06e-34^RecName: Full=PLASMODESMATA CALLOSE-BINDING PROTEIN 3;^Eukaryota; Viridiplantae; Streptophyta; Embryophyta; Tracheophyta; Spermatophyta; Magnoliophyta; eudicotyledons; Gunneridae; Pentapetalae; rosids; malvids; Brassicales; Brassicaceae; Camelineae; Arabidopsis	1	1	1		1	1	1	1	0	0	1	0	0	1	0	0	1	6.6	6.6	6.6	20.367	197	197	0	11.362			By MS/MS	0	0	6.6	1940800	0	0	1940800	0	0	3331200	0	0	3	3
Semispecific	c114505/1/1264|m.49694	c114505/1/1264|m.49694	c114505/1/1264|m.49694	CYSEP_VIGMU^CYSEP_VIGMU^Q:17-91,H:51-123^65.333%ID^E:3.75e-27^RecName: Full=Vignain;^Eukaryota; Viridiplantae; Streptophyta; Embryophyta; Tracheophyta; Spermatophyta; Magnoliophyta; eudicotyledons; Gunneridae; Pentapetalae; rosids; fabids; Fabales; Fabaceae; Papilionoideae; Phaseoleae; Vigna	1	1	1		1	1	1	1	1	0	0	1	0	0	1	0	0	10	10	10	19.994	170	170	0	5.7745	By MS/MS			10	0	0	12643000	12643000	0	0	35648000	0	0	2	0	0	2
Semispecific	c115783/1/1375|m.50655	c115783/1/1375|m.50655	c115783/1/1375|m.50655	TMN7_ARATH^TMN7_ARATH^Q:1-915,H:255-588^33.531%ID^E:2.19e-15^RecName: Full=Transmembrane 9 superfamily member 7 {ECO:0000305};^Eukaryota; Viridiplantae; Streptophyta; Embryophyta; Tracheophyta; Spermatophyta; Magnoliophyta; eudicotyledons; Gunneridae; Pentapetalae; rosids; malvids; Brassicales; Brassicaceae; Camelineae; Arabidopsis`TMN7_ARATH^TMN7_ARATH^Q:662-1060,H:499-641^41.333%ID^E:4.95e-07^R…	1	1	1		1	1	1	1	1	1	0	1	1	0	1	1	0	15.1	15.1	15.1	12.569	106	106	0.008547	4.9916	By MS/MS	By matching		15.1	15.1	0	19500000	18790000	710670	0	19987000	0	0	1	0	0	1
Semispecific	c115989/1/2287|m.50845	c115989/1/2287|m.50845	c115989/1/2287|m.50845	BRPF3_HUMAN^BRPF3_HUMAN^Q:15-79,H:622-686^49.231%ID^E:1.56e-12^RecName: Full=Bromodomain and PHD finger-containing protein 3;^Eukaryota; Metazoa; Chordata; Craniata; Vertebrata; Euteleostomi; Mammalia; Eutheria; Euarchontoglires; Primates; Haplorrhini; Catarrhini; Hominidae; Homo	1	1	1		1	1	1	1	0	1	1	0	1	1	0	1	1	4.1	4.1	4.1	40.795	370	370	0	5.526		By MS/MS	By MS/MS	0	4.1	4.1	0	0	0	0	0	0	0	0	1	1	2
Semispecific	c117475/1/2361|m.51937	c117475/1/2361|m.51937	c117475/1/2361|m.51937	GLGB_ASPOR^GLGB_ASPOR^Q:75-199,H:415-539^84%ID^E:2.28e-72^RecName: Full=1,4-alpha-glucan-branching enzyme;^Eukaryota; Fungi; Dikarya; Ascomycota; Pezizomycotina; Eurotiomycetes; Eurotiomycetidae; Eurotiales; Aspergillaceae; Aspergillus	1	1	1		1	1	1	1	1	0	0	1	0	0	1	0	0	2.6	2.6	2.6	37.79	350	350	0	5.4002	By MS/MS			2.6	0	0	6113800	6113800	0	0	15749000	0	0	1	0	0	1
Semispecific	c11776/1/1564|m.11174	c11776/1/1564|m.11174	c11776/1/1564|m.11174	LYM1_ARATH^LYM1_ARATH^Q:4-261,H:5-259^75.194%ID^E:4.69e-135^RecName: Full=LysM domain-containing GPI-anchored protein 1;^Eukaryota; Viridiplantae; Streptophyta; Embryophyta; Tracheophyta; Spermatophyta; Magnoliophyta; eudicotyledons; Gunneridae; Pentapetalae; rosids; malvids; Brassicales; Brassicaceae; Camelineae; Arabidopsis	1	1	1		1	1	1	1	0	0	1	0	0	1	0	0	1	3.8	3.8	3.8	33.227	314	314	0	9.0822			By MS/MS	0	0	3.8	0	0	0	0	0	0	0	0	0	3	3
Semispecific	c120743/2/1801|m.54412	c120743/2/1801|m.54412	c120743/2/1801|m.54412	FBK69_ARATH^FBK69_ARATH^Q:311-1261,H:5-311^33.739%ID^E:2.77e-21^RecName: Full=F-box/kelch-repeat protein At3g24760;^Eukaryota; Viridiplantae; Streptophyta; Embryophyta; Tracheophyta; Spermatophyta; Magnoliophyta; eudicotyledons; Gunneridae; Pentapetalae; rosids; malvids; Brassicales; Brassicaceae; Camelineae; Arabidopsis`FBK69_ARATH^FBK69_ARATH^Q:616-1398,H:102-360^32.432%ID^E:3.67e-20^RecName: F…	1	1	1		1	1	1	1	1	0	0	1	0	0	1	0	0	16	16	16	11.374	100	100	0	5.5301	By MS/MS			16	0	0	9554100	9554100	0	0	8589000	0	0	1	0	0	1
Semispecific	c124293/1/1038|m.57021	c124293/1/1038|m.57021	c124293/1/1038|m.57021	RS5_CICAR^RS5_CICAR^Q:63-252,H:8-197^88.421%ID^E:4.22e-123^RecName: Full=40S ribosomal protein S5;^Eukaryota; Viridiplantae; Streptophyta; Embryophyta; Tracheophyta; Spermatophyta; Magnoliophyta; eudicotyledons; Gunneridae; Pentapetalae; rosids; fabids; Fabales; Fabaceae; Papilionoideae; Cicereae; Cicer	1	1	1		1	1	1	1	1	0	0	1	0	0	1	0	0	4.8	4.8	4.8	27.755	252	252	0.007874	4.9092	By MS/MS			4.8	0	0	0	0	0	0	0	0	0	1	0	0	1
Semispecific	c12531/1/1405|m.11796	c12531/1/1405|m.11796	c12531/1/1405|m.11796	IFRH_SOLTU^IFRH_SOLTU^Q:116-589,H:18-179^40%ID^E:1.61e-14^RecName: Full=Isoflavone reductase homolog;^Eukaryota; Viridiplantae; Streptophyta; Embryophyta; Tracheophyta; Spermatophyta; Magnoliophyta; eudicotyledons; Gunneridae; Pentapetalae; asterids; lamiids; Solanales; Solanaceae; Solanoideae; Solaneae; Solanum`IFRH_SOLTU^IFRH_SOLTU^Q:369-812,H:105-257^33.735%ID^E:1.61e-06^RecName: Full=Isoflavo…	1	1	1		1	1	1	1	0	1	1	0	1	1	0	1	1	5.8	5.8	5.8	17.231	154	154	0	5.8928		By matching	By MS/MS	0	5.8	5.8	170970000	0	4499700	166470000	0	0	265890000	0	0	4	4
Semispecific	c126446/1/1490|m.58643	c126446/1/1490|m.58643	c126446/1/1490|m.58643	RING1_GOSHI^RING1_GOSHI^Q:1-152,H:175-319^62.5%ID^E:2.91e-60^RecName: Full=E3 ubiquitin-protein ligase RING1;^Eukaryota; Viridiplantae; Streptophyta; Embryophyta; Tracheophyta; Spermatophyta; Magnoliophyta; eudicotyledons; Gunneridae; Pentapetalae; rosids; malvids; Malvales; Malvaceae; Malvoideae; Gossypium	1	1	1		1	1	1	1	1	1	1	1	1	1	1	1	1	5.6	5.6	5.6	20.993	195	195	0	5.626	By matching	By MS/MS	By MS/MS	5.6	5.6	5.6	7557300	2821900	0	4735500	0	0	6534900	0	2	1	3
Semispecific	c14061/1/1721|m.13110	c14061/1/1721|m.13110	c14061/1/1721|m.13110	DPOD2_ORYSJ^DPOD2_ORYSJ^Q:947-1498,H:250-426^29.947%ID^E:1.5e-21^RecName: Full=DNA polymerase delta small subunit;^Eukaryota; Viridiplantae; Streptophyta; Embryophyta; Tracheophyta; Spermatophyta; Magnoliophyta; Liliopsida; Poales; Poaceae; BEP clade; Ehrhartoideae; Oryzeae; Oryza	1	1	1		1	1	1	1	0	1	0	0	1	0	0	1	0	7	7	7	16.116	142	142	0	5.1369		By MS/MS		0	7	0	3329300	0	3329300	0	0	30539000	0	0	1	0	1
Semispecific	c160008/1/1091|m.65250	c160008/1/1091|m.65250	c160008/1/1091|m.65250	TSJT1_TOBAC^TSJT1_TOBAC^Q:1-149,H:1-148^40%ID^E:2.68e-32^RecName: Full=Stem-specific protein TSJT1;^Eukaryota; Viridiplantae; Streptophyta; Embryophyta; Tracheophyta; Spermatophyta; Magnoliophyta; eudicotyledons; Gunneridae; Pentapetalae; asterids; lamiids; Solanales; Solanaceae; Nicotianoideae; Nicotianeae; Nicotiana	1	1	1		1	1	1	1	0	1	0	0	1	0	0	1	0	4.8	4.8	4.8	27.539	252	252	0	5.5252		By MS/MS		0	4.8	0	0	0	0	0	0	0	0	0	1	0	1
Semispecific	c167759/1/1631|m.71132	c167759/1/1631|m.71132	c167759/1/1631|m.71132	UKL1_ARATH^UKL1_ARATH^Q:70-248,H:58-236^81.006%ID^E:6.42e-95^RecName: Full=Uridine kinase-like protein 1, chloroplastic;^Eukaryota; Viridiplantae; Streptophyta; Embryophyta; Tracheophyta; Spermatophyta; Magnoliophyta; eudicotyledons; Gunneridae; Pentapetalae; rosids; malvids; Brassicales; Brassicaceae; Camelineae; Arabidopsis	1	1	1		1	1	1	1	0	1	0	0	1	0	0	1	0	4.8	4.8	4.8	28.688	251	251	0	6.7037		By MS/MS		0	4.8	0	13086000	0	13086000	0	0	10825000	0	0	2	0	2
Semispecific	c168079/1/1246|m.71378	c168079/1/1246|m.71378	c168079/1/1246|m.71378	UPL1_ARATH^UPL1_ARATH^Q:1-141,H:2667-2808^78.873%ID^E:4.07e-65^RecName: Full=E3 ubiquitin-protein ligase UPL1;^Eukaryota; Viridiplantae; Streptophyta; Embryophyta; Tracheophyta; Spermatophyta; Magnoliophyta; eudicotyledons; Gunneridae; Pentapetalae; rosids; malvids; Brassicales; Brassicaceae; Camelineae; Arabidopsis	1	1	1		1	1	1	1	1	0	0	1	0	0	1	0	0	6.3	6.3	6.3	15.501	142	142	0	6.8602	By MS/MS			6.3	0	0	229880000	229880000	0	0	521820000	0	0	6	0	0	6
Semispecific	c170329/1/1926|m.73142	c170329/1/1926|m.73142	c170329/1/1926|m.73142	YC22_ARATH^YC22_ARATH^Q:19-235,H:62-278^66.82%ID^E:2.59e-102^RecName: Full=Uncharacterized calcium-binding protein At1g02270;^Eukaryota; Viridiplantae; Streptophyta; Embryophyta; Tracheophyta; Spermatophyta; Magnoliophyta; eudicotyledons; Gunneridae; Pentapetalae; rosids; malvids; Brassicales; Brassicaceae; Camelineae; Arabidopsis	1	1	1		1	1	1	1	0	0	1	0	0	1	0	0	1	8.3	8.3	8.3	30.568	265	265	0	6.5662			By MS/MS	0	0	8.3	0	0	0	0	0	0	0	0	0	1	1
Semispecific	c170933/1/1134|m.73598	c170933/1/1134|m.73598	c170933/1/1134|m.73598	ATPG_SPIOL^ATPG_SPIOL^Q:1-58,H:50-107^93.103%ID^E:9.13e-29^RecName: Full=ATP synthase gamma chain, chloroplastic;^Eukaryota; Viridiplantae; Streptophyta; Embryophyta; Tracheophyta; Spermatophyta; Magnoliophyta; eudicotyledons; Gunneridae; Pentapetalae; Caryophyllales; Amaranthaceae; Chenopodioideae; Anserineae; Spinacia	1	1	1		1	1	1	1	1	0	0	1	0	0	1	0	0	9.4	9.4	9.4	14.911	127	127	0.0081301	4.912	By MS/MS			9.4	0	0	0	0	0	0	0	0	0	1	0	0	1
Semispecific	c199605/2/1316|m.75860	c199605/2/1316|m.75860	c199605/2/1316|m.75860	PER47_ARATH^PER47_ARATH^Q:1-131,H:195-325^74.046%ID^E:4.1e-62^RecName: Full=Peroxidase 47;^Eukaryota; Viridiplantae; Streptophyta; Embryophyta; Tracheophyta; Spermatophyta; Magnoliophyta; eudicotyledons; Gunneridae; Pentapetalae; rosids; malvids; Brassicales; Brassicaceae; Camelineae; Arabidopsis	1	1	1		1	1	1	1	1	0	0	1	0	0	1	0	0	7.6	7.6	7.6	14.335	131	131	0	5.8822	By MS/MS			7.6	0	0	3414700	3414700	0	0	3069800	0	0	1	0	0	1
Semispecific	c199639/3/1268|m.75900	c199639/3/1268|m.75900	c199639/3/1268|m.75900	PPIL2_ARATH^PPIL2_ARATH^Q:1-335,H:1-332^77.313%ID^E:0^RecName: Full=Peptidyl-prolyl cis-trans isomerase CYP65 {ECO:0000305};^Eukaryota; Viridiplantae; Streptophyta; Embryophyta; Tracheophyta; Spermatophyta; Magnoliophyta; eudicotyledons; Gunneridae; Pentapetalae; rosids; malvids; Brassicales; Brassicaceae; Camelineae; Arabidopsis	1	1	1		1	1	1	1	1	0	0	1	0	0	1	0	0	5.1	5.1	5.1	37.07	336	336	0	6.3199	By MS/MS			5.1	0	0	3952000	3952000	0	0	12362000	0	0	1	0	0	1
Semispecific	c200395/1/2582|m.76579	c200395/1/2582|m.76579	c200395/1/2582|m.76579	KC11_YEAST^KC11_YEAST^Q:828-1268,H:118-266^26.174%ID^E:5.12e-10^RecName: Full=Casein kinase I homolog 1;^Eukaryota; Fungi; Dikarya; Ascomycota; Saccharomycotina; Saccharomycetes; Saccharomycetales; Saccharomycetaceae; Saccharomyces	1	1	1		1	1	1	1	0	1	1	0	1	1	0	1	1	6.6	6.6	6.6	15.232	137	137	0	5.8799		By matching	By MS/MS	0	6.6	6.6	15529000	0	320550	15208000	0	0	20957000	0	0	3	3
Semispecific	c202940/2/1519|m.78658	c202940/2/1519|m.78658	c202940/2/1519|m.78658	ACTG_EMENI^ACTG_EMENI^Q:1-203,H:82-284^99.015%ID^E:3.82e-142^RecName: Full=Actin, gamma;^Eukaryota; Fungi; Dikarya; Ascomycota; Pezizomycotina; Eurotiomycetes; Eurotiomycetidae; Eurotiales; Aspergillaceae; Aspergillus	1	1	1		1	1	1	1	1	0	0	1	0	0	1	0	0	5.3	5.3	5.3	34.296	303	303	0	36.809	By MS/MS			5.3	0	0	21102000	21102000	0	0	38842000	0	0	20	0	0	20
Semispecific	c203275/1/2082|m.78957	c203275/1/2082|m.78957	c203275/1/2082|m.78957	.	1	1	1		1	1	1	1	0	1	0	0	1	0	0	1	0	2.4	2.4	2.4	43.05	414	414	0	5.9059		By MS/MS		0	2.4	0	20423000	0	20423000	0	0	16344000	0	0	2	0	2
Semispecific	c203970/1/2503|m.79472	c203970/1/2503|m.79472	c203970/1/2503|m.79472	SEC23_MAGO7^SEC23_MAGO7^Q:211-816,H:4-192^29.952%ID^E:6.56e-11^RecName: Full=Protein transport protein SEC23;^Eukaryota; Fungi; Dikarya; Ascomycota; Pezizomycotina; Sordariomycetes; Sordariomycetidae; Magnaporthales; Magnaporthaceae; Magnaporthe`SEC23_MAGO7^SEC23_MAGO7^Q:933-983,H:230-246^47.059%ID^E:6.56e-11^RecName: Full=Protein transport protein SEC23;^Eukaryota; Fungi; Dikarya; Ascomycota; Pe…	1	1	1		1	1	1	1	0	0	1	0	0	1	0	0	1	10.2	10.2	10.2	12.582	108	108	0.0077519	4.8989			By MS/MS	0	0	10.2	0	0	0	0	0	0	0	0	0	1	1
Semispecific	c207858/2/2233|m.82586	c207858/2/2233|m.82586	c207858/2/2233|m.82586	PATL1_ARATH^PATL1_ARATH^Q:85-243,H:91-217^38.994%ID^E:2.15e-06^RecName: Full=Patellin-1;^Eukaryota; Viridiplantae; Streptophyta; Embryophyta; Tracheophyta; Spermatophyta; Magnoliophyta; eudicotyledons; Gunneridae; Pentapetalae; rosids; malvids; Brassicales; Brassicaceae; Camelineae; Arabidopsis	1	1	1		1	1	1	1	0	1	0	0	1	0	0	1	0	3.7	3.7	3.7	35.281	323	323	0.009901	5.0708		By MS/MS		0	3.7	0	0	0	0	0	0	0	0	0	1	0	1
Semispecific	c209036/1/2171|m.83453	c209036/1/2171|m.83453	c209036/1/2171|m.83453	CATA_CAPAN^CATA_CAPAN^Q:713-853,H:163-209^64.583%ID^E:4.33e-15^RecName: Full=Catalase;^Eukaryota; Viridiplantae; Streptophyta; Embryophyta; Tracheophyta; Spermatophyta; Magnoliophyta; eudicotyledons; Gunneridae; Pentapetalae; asterids; lamiids; Solanales; Solanaceae; Solanoideae; Capsiceae; Capsicum`CATA_CAPAN^CATA_CAPAN^Q:864-1733,H:209-454^29.73%ID^E:4.33e-15^RecName: Full=Catalase;^Eukaryota; …	1	1	1		1	1	1	1	1	0	0	1	0	0	1	0	0	11.7	11.7	11.7	12.707	111	111	0	5.3749	By MS/MS			11.7	0	0	2586200	2586200	0	0	6661900	0	0	1	0	0	1
Semispecific	c209397/1/2102|m.83765	c209397/1/2102|m.83765	c209397/1/2102|m.83765	BAM9_ARATH^BAM9_ARATH^Q:1-508,H:1-536^52.302%ID^E:0^RecName: Full=Inactive beta-amylase 9;^Eukaryota; Viridiplantae; Streptophyta; Embryophyta; Tracheophyta; Spermatophyta; Magnoliophyta; eudicotyledons; Gunneridae; Pentapetalae; rosids; malvids; Brassicales; Brassicaceae; Camelineae; Arabidopsis	1	1	1		1	1	1	1	0	0	1	0	0	1	0	0	1	3.3	3.3	3.3	56.653	508	508	0	5.4831			By MS/MS	0	0	3.3	7984700	0	0	7984700	0	0	10827000	0	0	1	1
Semispecific	c210970/1/1746|m.85020	c210970/1/1746|m.85020	c210970/1/1746|m.85020	DCYD2_ARATH^DCYD2_ARATH^Q:12-104,H:52-146^41.667%ID^E:3.75e-11^RecName: Full=D-cysteine desulfhydrase 2, mitochondrial;^Eukaryota; Viridiplantae; Streptophyta; Embryophyta; Tracheophyta; Spermatophyta; Magnoliophyta; eudicotyledons; Gunneridae; Pentapetalae; rosids; malvids; Brassicales; Brassicaceae; Camelineae; Arabidopsis	1	1	1		1	1	1	1	1	0	0	1	0	0	1	0	0	8.5	8.5	8.5	16.284	142	142	0.0076923	4.8841	By MS/MS			8.5	0	0	0	0	0	0	0	0	0	1	0	0	1
Semispecific	c211159/1/1299|m.85160	c211159/1/1299|m.85160	c211159/1/1299|m.85160	CTL1_ARATH^CTL1_ARATH^Q:183-824,H:42-255^79.439%ID^E:4.64e-128^RecName: Full=Chitinase-like protein 1;^Eukaryota; Viridiplantae; Streptophyta; Embryophyta; Tracheophyta; Spermatophyta; Magnoliophyta; eudicotyledons; Gunneridae; Pentapetalae; rosids; malvids; Brassicales; Brassicaceae; Camelineae; Arabidopsis`CTL1_ARATH^CTL1_ARATH^Q:812-997,H:252-313^69.355%ID^E:4.64e-128^RecName: Full=Chitinase-l…	1	1	1		1	1	1	1	0	1	0	0	1	0	0	1	0	11.8	11.8	11.8	11.141	102	102	0.0079365	4.9108		By MS/MS		0	11.8	0	0	0	0	0	0	0	0	0	1	0	1
Semispecific	c213161/1/1394|m.86697	c213161/1/1394|m.86697	c213161/1/1394|m.86697	PIL1_YEAST^PIL1_YEAST^Q:98-838,H:1-273^64.599%ID^E:1.34e-119^RecName: Full=Sphingolipid long chain base-responsive protein PIL1;^Eukaryota; Fungi; Dikarya; Ascomycota; Saccharomycotina; Saccharomycetes; Saccharomycetales; Saccharomycetaceae; Saccharomyces	1	1	1		1	1	1	1	0	0	1	0	0	1	0	0	1	2.8	2.8	2.8	50.091	464	464	0	5.2674			By MS/MS	0	0	2.8	0	0	0	0	0	0	0	0	0	1	1
Semispecific	c213913/1/1872|m.87318	c213913/1/1872|m.87318	c213913/1/1872|m.87318	POB1_ARATH^POB1_ARATH^Q:1-543,H:1-556^69.767%ID^E:0^RecName: Full=BTB/POZ domain-containing protein POB1;^Eukaryota; Viridiplantae; Streptophyta; Embryophyta; Tracheophyta; Spermatophyta; Magnoliophyta; eudicotyledons; Gunneridae; Pentapetalae; rosids; malvids; Brassicales; Brassicaceae; Camelineae; Arabidopsis	1	1	1		1	1	1	1	0	1	0	0	1	0	0	1	0	1.7	1.7	1.7	61.592	544	544	0	6.1645		By MS/MS		0	1.7	0	32222000	0	32222000	0	0	57915000	0	0	5	0	5
Semispecific	c215474/1/2325|m.88555	c215474/1/2325|m.88555	c215474/1/2325|m.88555	LUB1_SCHPO^LUB1_SCHPO^Q:744-1439,H:143-367^27.039%ID^E:2.11e-06^RecName: Full=Ubiquitin homeostasis protein lub1;^Eukaryota; Fungi; Dikarya; Ascomycota; Taphrinomycotina; Schizosaccharomycetes; Schizosaccharomycetales; Schizosaccharomycetaceae; Schizosaccharomyces	1	1	1		1	1	1	1	1	0	0	1	0	0	1	0	0	10.1	10.1	10.1	17.79	159	159	0	5.7102	By MS/MS			10.1	0	0	16352000	16352000	0	0	42122000	0	0	1	0	0	1
Semispecific	c247076/1/1546|m.92261	c247076/1/1546|m.92261	c247076/1/1546|m.92261	TBB_TETTH^TBB_TETTH^Q:17-459,H:1-443^96.388%ID^E:0^RecName: Full=Tubulin beta chain;^Eukaryota; Alveolata; Ciliophora; Intramacronucleata; Oligohymenophorea; Hymenostomatida; Tetrahymenina; Tetrahymenidae; Tetrahymena	1	1	1		1	1	1	1	1	0	0	1	0	0	1	0	0	2.6	2.6	2.6	51.528	460	460	0	11.087	By MS/MS			2.6	0	0	0	0	0	0	0	0	0	1	0	0	1
Semispecific	c247124/1/1412|m.92293	c247124/1/1412|m.92293	c247124/1/1412|m.92293	CID7_ARATH^CID7_ARATH^Q:36-151,H:405-531^33.071%ID^E:1.9e-07^RecName: Full=Polyadenylate-binding protein-interacting protein 7;^Eukaryota; Viridiplantae; Streptophyta; Embryophyta; Tracheophyta; Spermatophyta; Magnoliophyta; eudicotyledons; Gunneridae; Pentapetalae; rosids; malvids; Brassicales; Brassicaceae; Camelineae; Arabidopsis	1	1	1		1	1	1	1	0	1	0	0	1	0	0	1	0	9.3	9.3	9.3	18.135	161	161	0	5.2807		By MS/MS		0	9.3	0	0	0	0	0	0	0	0	0	1	0	1
Semispecific	c252975/1/1678|m.96603	c252975/1/1678|m.96603	c252975/1/1678|m.96603	. PREDICTED: uncharacterized protein LOC108211511 [Daucus carota subsp. sativus] E=3e-47, 60%	1	1	1		1	1	1	1	0	0	1	0	0	1	0	0	1	10.3	10.3	10.3	17.022	146	146	0	8.7279			By MS/MS	0	0	10.3	1800600	0	0	1800600	0	0	2601700	0	0	1	1
Semispecific	c254910/1/1471|m.98078	c254910/1/1471|m.98078	c254910/1/1471|m.98078	GTOMC_ORYSJ^GTOMC_ORYSJ^Q:135-238,H:74-178^59.048%ID^E:1.87e-32^RecName: Full=Probable tocopherol O-methyltransferase, chloroplastic;^Eukaryota; Viridiplantae; Streptophyta; Embryophyta; Tracheophyta; Spermatophyta; Magnoliophyta; Liliopsida; Poales; Poaceae; BEP clade; Ehrhartoideae; Oryzeae; Oryza	1	1	1		1	1	1	1	0	1	1	0	1	1	0	1	1	4.7	4.7	4.7	32.544	298	298	0	6.0347		By MS/MS	By MS/MS	0	4.7	4.7	21809000	0	4425300	17384000	0	0	26697000	0	2	1	3
Semispecific	c255824/1/1313|m.98796	c255824/1/1313|m.98796	c255824/1/1313|m.98796	CDT1A_ARATH^CDT1A_ARATH^Q:33-260,H:323-558^44.49%ID^E:9.56e-45^RecName: Full=CDT1-like protein a, chloroplastic;^Eukaryota; Viridiplantae; Streptophyta; Embryophyta; Tracheophyta; Spermatophyta; Magnoliophyta; eudicotyledons; Gunneridae; Pentapetalae; rosids; malvids; Brassicales; Brassicaceae; Camelineae; Arabidopsis	1	1	1		1	1	1	1	0	1	0	0	1	0	0	1	0	4.5	4.5	4.5	29.599	264	264	0.010204	5.097		By MS/MS		0	4.5	0	0	0	0	0	0	0	0	0	1	0	1
Semispecific	c260332/1/2353|m.102081	c260332/1/2353|m.102081	c260332/1/2353|m.102081	NIN3_ORYSJ^NIN3_ORYSJ^Q:86-341,H:59-297^65.234%ID^E:1.13e-109^RecName: Full=Neutral/alkaline invertase 3, chloroplastic {ECO:0000305};^Eukaryota; Viridiplantae; Streptophyta; Embryophyta; Tracheophyta; Spermatophyta; Magnoliophyta; Liliopsida; Poales; Poaceae; BEP clade; Ehrhartoideae; Oryzeae; Oryza	1	1	1		1	1	1	1	0	1	1	0	1	1	0	1	1	3.2	3.2	3.2	38.405	345	345	0	5.236		By matching	By MS/MS	0	3.2	3.2	4992100	0	989150	4002900	0	0	5502200	0	0	1	1
Semispecific	c261260/1/1651|m.102829	c261260/1/1651|m.102829	c261260/1/1651|m.102829	PLT5_ARATH^PLT5_ARATH^Q:1-393,H:145-536^70.558%ID^E:0^RecName: Full=Polyol transporter 5;^Eukaryota; Viridiplantae; Streptophyta; Embryophyta; Tracheophyta; Spermatophyta; Magnoliophyta; eudicotyledons; Gunneridae; Pentapetalae; rosids; malvids; Brassicales; Brassicaceae; Camelineae; Arabidopsis	1	1	1		1	1	1	1	0	1	0	0	1	0	0	1	0	3	3	3	43.503	398	398	0.0081967	4.9126		By MS/MS		0	3	0	0	0	0	0	0	0	0	0	1	0	1
Semispecific	c261363/1/1810|m.102910	c261363/1/1810|m.102910	c261363/1/1810|m.102910	PPB_YEAST^PPB_YEAST^Q:1-356,H:163-538^49.868%ID^E:3.48e-116^RecName: Full=Repressible alkaline phosphatase;^Eukaryota; Fungi; Dikarya; Ascomycota; Saccharomycotina; Saccharomycetes; Saccharomycetales; Saccharomycetaceae; Saccharomyces	1	1	1		1	1	1	1	0	0	1	0	0	1	0	0	1	2.2	2.2	2.2	44.955	408	408	0	5.1545			By MS/MS	0	0	2.2	5033200	0	0	5033200	0	0	6964100	0	0	1	1
Semispecific	c263022/1/1244|m.775	c263022/1/1244|m.775	c263022/1/1244|m.775	PPDEX_ARATH^PPDEX_ARATH^Q:369-698,H:59-168^59.091%ID^E:2.52e-42^RecName: Full=DeSI-like protein At4g17486;^Eukaryota; Viridiplantae; Streptophyta; Embryophyta; Tracheophyta; Spermatophyta; Magnoliophyta; eudicotyledons; Gunneridae; Pentapetalae; rosids; malvids; Brassicales; Brassicaceae; Camelineae; Arabidopsis	1	1	1		1	1	1	1	0	1	1	0	1	1	0	1	1	14.3	14.3	14.3	12.056	105	105	0	5.2782		By matching	By MS/MS	0	14.3	14.3	42065000	0	4592900	37472000	0	0	51490000	0	0	1	1
Semispecific	c27251/1/1752|m.17214	c27251/1/1752|m.17214	c27251/1/1752|m.17214	BGL18_ORYSJ^BGL18_ORYSJ^Q:40-254,H:27-242^69.444%ID^E:3.14e-107^RecName: Full=Beta-glucosidase 18;^Eukaryota; Viridiplantae; Streptophyta; Embryophyta; Tracheophyta; Spermatophyta; Magnoliophyta; Liliopsida; Poales; Poaceae; BEP clade; Ehrhartoideae; Oryzeae; Oryza	1	1	1		1	1	1	1	1	0	0	1	0	0	1	0	0	6.3	6.3	6.3	30.607	271	271	0	5.1408	By MS/MS			6.3	0	0	12490000	12490000	0	0	32174000	0	0	1	0	0	1
Semispecific	c2781/1/1466|m.2952	c2781/1/1466|m.2952	c2781/1/1466|m.2952	PPA2_ARATH^PPA2_ARATH^Q:2-137,H:297-433^59.124%ID^E:9.61e-47^RecName: Full=Probable inactive purple acid phosphatase 2;^Eukaryota; Viridiplantae; Streptophyta; Embryophyta; Tracheophyta; Spermatophyta; Magnoliophyta; eudicotyledons; Gunneridae; Pentapetalae; rosids; malvids; Brassicales; Brassicaceae; Camelineae; Arabidopsis	1	1	1		1	1	1	1	0	0	1	0	0	1	0	0	1	6.6	6.6	6.6	15.303	137	137	0	6.1816			By MS/MS	0	0	6.6	6899100	0	0	6899100	0	0	9285200	0	0	2	2
Semispecific	c28857/1/1635|m.18416	c28857/1/1635|m.18416	c28857/1/1635|m.18416	PTR33_ARATH^PTR33_ARATH^Q:1-302,H:152-457^61.093%ID^E:5.5e-115^RecName: Full=Protein NRT1/ PTR FAMILY 6.4;^Eukaryota; Viridiplantae; Streptophyta; Embryophyta; Tracheophyta; Spermatophyta; Magnoliophyta; eudicotyledons; Gunneridae; Pentapetalae; rosids; malvids; Brassicales; Brassicaceae; Camelineae; Arabidopsis	1	1	1		1	1	1	1	1	0	0	1	0	0	1	0	0	5.2	5.2	5.2	34.414	306	306	0	5.7268	By MS/MS			5.2	0	0	0	0	0	0	0	0	0	1	0	0	1
Semispecific	c2906/2/1638|m.3058	c2906/2/1638|m.3058	c2906/2/1638|m.3058	MSH2_ARATH^MSH2_ARATH^Q:27-546,H:1-520^68.077%ID^E:0^RecName: Full=DNA mismatch repair protein MSH2;^Eukaryota; Viridiplantae; Streptophyta; Embryophyta; Tracheophyta; Spermatophyta; Magnoliophyta; eudicotyledons; Gunneridae; Pentapetalae; rosids; malvids; Brassicales; Brassicaceae; Camelineae; Arabidopsis	1	1	1		1	1	1	1	0	1	1	0	1	1	0	1	1	1.6	1.6	1.6	61.576	546	546	0	5.2865		By matching	By MS/MS	0	1.6	1.6	32097000	0	324910	31772000	0	0	43833000	0	0	1	1
Semispecific	c298879/1/1801|m.90116	c298879/1/1801|m.90116	c298879/1/1801|m.90116	.	1	1	1		1	1	1	1	0	0	1	0	0	1	0	0	1	14.2	14.2	14.2	11.355	106	106	0.01	5.0805			By MS/MS	0	0	14.2	0	0	0	0	0	0	0	0	0	1	1
Semispecific	c299721/1/1758|m.90535	c299721/1/1758|m.90535	c299721/1/1758|m.90535	METK_PINBN^METK_PINBN^Q:41-109,H:1-73^84.932%ID^E:1.16e-35^RecName: Full=S-adenosylmethionine synthase;^Eukaryota; Viridiplantae; Streptophyta; Embryophyta; Tracheophyta; Spermatophyta; Pinidae; Pinales; Pinaceae; Pinus; Pinus	1	1	1		1	1	1	1	0	0	1	0	0	1	0	0	1	11.7	11.7	11.7	13.39	120	120	0	11.223			By MS/MS	0	0	11.7	0	0	0	0	0	0	0	0	0	1	1
Semispecific	c301329/1/1844|m.27148	c301329/1/1844|m.27148	c301329/1/1844|m.27148	TFB1A_ARATH^TFB1A_ARATH^Q:1021-1293,H:499-589^73.626%ID^E:5.17e-36^RecName: Full=Probable RNA polymerase II transcription factor B subunit 1-1;^Eukaryota; Viridiplantae; Streptophyta; Embryophyta; Tracheophyta; Spermatophyta; Magnoliophyta; eudicotyledons; Gunneridae; Pentapetalae; rosids; malvids; Brassicales; Brassicaceae; Camelineae; Arabidopsis`TFB1A_ARATH^TFB1A_ARATH^Q:691-1131,H:210-357^56.…	1	1	1		1	1	1	1	0	0	1	0	0	1	0	0	1	13.6	13.6	13.6	13.659	118	118	0	6.0112			By MS/MS	0	0	13.6	27824000	0	0	27824000	0	0	42861000	0	0	1	1
Semispecific	c302633/1/1350|m.27757	c302633/1/1350|m.27757	c302633/1/1350|m.27757	ENPL_HORVU^ENPL_HORVU^Q:1-228,H:68-295^89.912%ID^E:1.17e-141^RecName: Full=Endoplasmin homolog;^Eukaryota; Viridiplantae; Streptophyta; Embryophyta; Tracheophyta; Spermatophyta; Magnoliophyta; Liliopsida; Poales; Poaceae; BEP clade; Pooideae; Triticeae; Hordeum	1	1	1		1	1	1	1	1	0	0	1	0	0	1	0	0	4.3	4.3	4.3	31.562	276	276	0	7.8691	By MS/MS			4.3	0	0	0	0	0	0	0	0	0	2	0	0	2
Semispecific	c303145/1/1498|m.28073	c303145/1/1498|m.28073	c303145/1/1498|m.28073	ATPAM_SOYBN^ATPAM_SOYBN^Q:1-310,H:148-457^99.677%ID^E:0^RecName: Full=ATP synthase subunit alpha, mitochondrial;^Eukaryota; Viridiplantae; Streptophyta; Embryophyta; Tracheophyta; Spermatophyta; Magnoliophyta; eudicotyledons; Gunneridae; Pentapetalae; rosids; fabids; Fabales; Fabaceae; Papilionoideae; Phaseoleae; Glycine; Soja	1	1	1		1	1	1	1	0	1	0	0	1	0	0	1	0	3.9	3.9	3.9	33.622	310	310	0.0078125	4.9067		By MS/MS		0	3.9	0	0	0	0	0	0	0	0	0	1	0	1
Semispecific	c33079/1/1567|m.21704	c33079/1/1567|m.21704	c33079/1/1567|m.21704	.	1	1	1		1	1	1	1	0	0	1	0	0	1	0	0	1	6.1	6.1	6.1	30.295	264	264	0	5.5056			By MS/MS	0	0	6.1	0	0	0	0	0	0	0	0	0	1	1
Semispecific	c35066/1/1709|m.23553	c35066/1/1709|m.23553	c35066/1/1709|m.23553	MT21A_HUMAN^MT21A_HUMAN^Q:69-178,H:27-127^43.636%ID^E:1.32e-17^RecName: Full=Protein N-lysine methyltransferase METTL21A;^Eukaryota; Metazoa; Chordata; Craniata; Vertebrata; Euteleostomi; Mammalia; Eutheria; Euarchontoglires; Primates; Haplorrhini; Catarrhini; Hominidae; Homo	1	1	1		1	1	1	1	1	0	0	1	0	0	1	0	0	4.7	4.7	4.7	35.574	319	319	0	5.5395	By MS/MS			4.7	0	0	6590100	6590100	0	0	19436000	0	0	2	0	0	2
Semispecific	c6086/1/1440|m.5911	c6086/1/1440|m.5911	c6086/1/1440|m.5911	ASHR2_ARATH^ASHR2_ARATH^Q:88-927,H:12-289^29.568%ID^E:2.23e-13^RecName: Full=Histone-lysine N-methyltransferase ASHR2;^Eukaryota; Viridiplantae; Streptophyta; Embryophyta; Tracheophyta; Spermatophyta; Magnoliophyta; eudicotyledons; Gunneridae; Pentapetalae; rosids; malvids; Brassicales; Brassicaceae; Camelineae; Arabidopsis`ASHR2_ARATH^ASHR2_ARATH^Q:168-860,H:40-266^33.206%ID^E:1.02e-11^RecName: …	1	1	1		1	1	1	1	0	0	1	0	0	1	0	0	1	15.8	15.8	15.8	11.275	101	101	0	5.6643			By MS/MS	0	0	15.8	0	0	0	0	0	0	0	0	0	1	1
Semispecific	c65986/1/2021|m.34966	c65986/1/2021|m.34966	c65986/1/2021|m.34966	PPOC_ARATH^PPOC_ARATH^Q:46-579,H:13-537^69.663%ID^E:0^RecName: Full=Protoporphyrinogen oxidase 1, chloroplastic;^Eukaryota; Viridiplantae; Streptophyta; Embryophyta; Tracheophyta; Spermatophyta; Magnoliophyta; eudicotyledons; Gunneridae; Pentapetalae; rosids; malvids; Brassicales; Brassicaceae; Camelineae; Arabidopsis	1	1	1		1	1	1	1	0	0	1	0	0	1	0	0	1	2.8	2.8	2.8	62.902	579	579	0	5.9776			By MS/MS	0	0	2.8	9364300	0	0	9364300	0	0	14432000	0	0	2	2
Semispecific	c66408/4/2341|m.35264	c66408/4/2341|m.35264	c66408/4/2341|m.35264	HDA5_ARATH^HDA5_ARATH^Q:12-216,H:24-228^71.707%ID^E:2.32e-104^RecName: Full=Histone deacetylase 5;^Eukaryota; Viridiplantae; Streptophyta; Embryophyta; Tracheophyta; Spermatophyta; Magnoliophyta; eudicotyledons; Gunneridae; Pentapetalae; rosids; malvids; Brassicales; Brassicaceae; Camelineae; Arabidopsis	1	1	1		1	1	1	1	0	0	1	0	0	1	0	0	1	6.5	6.5	6.5	28.004	247	247	0	5.7012			By MS/MS	0	0	6.5	0	0	0	0	0	0	0	0	0	1	1
Semispecific	c69419/1/1296|m.37532	c69419/1/1296|m.37532	c69419/1/1296|m.37532	CSE_ARATH^CSE_ARATH^Q:12-202,H:21-208^26.943%ID^E:7.3e-11^RecName: Full=Caffeoylshikimate esterase;^Eukaryota; Viridiplantae; Streptophyta; Embryophyta; Tracheophyta; Spermatophyta; Magnoliophyta; eudicotyledons; Gunneridae; Pentapetalae; rosids; malvids; Brassicales; Brassicaceae; Camelineae; Arabidopsis	1	1	1		1	1	1	1	0	1	1	0	1	1	0	1	1	7.9	7.9	7.9	26.524	240	240	0	5.3313		By MS/MS	By matching	0	7.9	7.9	49431000	0	9254000	40177000	0	0	54699000	0	1	0	1
Semispecific	c74842/1/1279|m.41777	c74842/1/1279|m.41777	c74842/1/1279|m.41777	VATD_ARATH^VATD_ARATH^Q:1-261,H:1-261^81.992%ID^E:1.78e-158^RecName: Full=V-type proton ATPase subunit D;^Eukaryota; Viridiplantae; Streptophyta; Embryophyta; Tracheophyta; Spermatophyta; Magnoliophyta; eudicotyledons; Gunneridae; Pentapetalae; rosids; malvids; Brassicales; Brassicaceae; Camelineae; Arabidopsis	1	1	1		1	1	1	1	1	0	0	1	0	0	1	0	0	6.1	6.1	6.1	29.288	261	261	0	5.5056	By MS/MS			6.1	0	0	0	0	0	0	0	0	0	1	0	0	1
Semispecific	c76332/1/2175|m.43198	c76332/1/2175|m.43198	c76332/1/2175|m.43198	PHT16_ARATH^PHT16_ARATH^Q:121-567,H:21-500^27.51%ID^E:4.17e-36^RecName: Full=Probable inorganic phosphate transporter 1-6;^Eukaryota; Viridiplantae; Streptophyta; Embryophyta; Tracheophyta; Spermatophyta; Magnoliophyta; eudicotyledons; Gunneridae; Pentapetalae; rosids; malvids; Brassicales; Brassicaceae; Camelineae; Arabidopsis	1	1	1		1	1	1	1	0	0	1	0	0	1	0	0	1	1.7	1.7	1.7	76.336	692	692	0.0080645	4.912			By MS/MS	0	0	1.7	0	0	0	0	0	0	0	0	0	1	1
Semispecific	c76487/1/1051|m.43371	c76487/1/1051|m.43371	c76487/1/1051|m.43371	FLA7_ARATH^FLA7_ARATH^Q:42-256,H:45-254^63.426%ID^E:4.86e-75^RecName: Full=Fasciclin-like arabinogalactan protein 7;^Eukaryota; Viridiplantae; Streptophyta; Embryophyta; Tracheophyta; Spermatophyta; Magnoliophyta; eudicotyledons; Gunneridae; Pentapetalae; rosids; malvids; Brassicales; Brassicaceae; Camelineae; Arabidopsis	1	1	1		1	1	1	1	0	1	1	0	1	1	0	1	1	3.5	3.5	3.5	27.314	256	256	0	5.4214		By MS/MS	By matching	0	3.5	3.5	8387800	0	7931900	455950	0	0	782590	0	1	0	1
Semispecific	c120280/1/1614|m.54077	c120280/1/1614|m.54077	c120280/1/1614|m.54077	RNG1A_ARATH^RNG1A_ARATH^Q:7-355,H:142-519^51.181%ID^E:2.85e-107^RecName: Full=Putative E3 ubiquitin-protein ligase RING1a;^Eukaryota; Viridiplantae; Streptophyta; Embryophyta; Tracheophyta; Spermatophyta; Magnoliophyta; eudicotyledons; Gunneridae; Pentapetalae; rosids; malvids; Brassicales; Brassicaceae; Camelineae; Arabidopsis	1	1	1		1	1	1	1	0	0	1	0	0	1	0	0	1	5	5	5	40.369	361	361	0.0084746	4.987			By MS/MS	0	0	5	442710	0	0	442710	0	0	621910	0	0	0	0
Semispecific	c125413/1/1695|m.57817	c125413/1/1695|m.57817	c125413/1/1695|m.57817	TGT2_ARATH^TGT2_ARATH^Q:41-247,H:255-424^38.647%ID^E:2.45e-29^RecName: Full=Trihelix transcription factor GT-2;^Eukaryota; Viridiplantae; Streptophyta; Embryophyta; Tracheophyta; Spermatophyta; Magnoliophyta; eudicotyledons; Gunneridae; Pentapetalae; rosids; malvids; Brassicales; Brassicaceae; Camelineae; Arabidopsis	1	1	1		1	1	1	1	0	0	1	0	0	1	0	0	1	3.3	3.3	3.3	33.95	302	302	0	5.2851			By MS/MS	0	0	3.3	13383000	0	0	13383000	0	0	18354000	0	0	0	0
Semispecific	c155187/2/2182|m.61441	c155187/2/2182|m.61441	c155187/2/2182|m.61441	MED4_ARATH^MED4_ARATH^Q:1491-1565,H:242-266^88%ID^E:6.16e-15^RecName: Full=Mediator of RNA polymerase II transcription subunit 4;^Eukaryota; Viridiplantae; Streptophyta; Embryophyta; Tracheophyta; Spermatophyta; Magnoliophyta; eudicotyledons; Gunneridae; Pentapetalae; rosids; malvids; Brassicales; Brassicaceae; Camelineae; Arabidopsis`MED4_ARATH^MED4_ARATH^Q:1123-1410,H:117-210^47.917%ID^E:6.16e-…	1	1	1		1	1	1	1	1	0	0	1	0	0	1	0	0	13.4	13.4	13.4	14.992	134	134	0.0089286	5.0078	By MS/MS			13.4	0	0	6990800	6990800	0	0	18202000	0	0	0	0	0	0
Semispecific	c161828/1/2487|m.66650	c161828/1/2487|m.66650	c161828/1/2487|m.66650	TCX3_ARATH^TCX3_ARATH^Q:59-258,H:304-511^50.237%ID^E:5.62e-56^RecName: Full=Protein tesmin/TSO1-like CXC 3;^Eukaryota; Viridiplantae; Streptophyta; Embryophyta; Tracheophyta; Spermatophyta; Magnoliophyta; eudicotyledons; Gunneridae; Pentapetalae; rosids; malvids; Brassicales; Brassicaceae; Camelineae; Arabidopsis	1	1	1		1	1	1	1	1	0	0	1	0	0	1	0	0	4.2	4.2	4.2	47.733	427	427	0.0088496	5.0074	By MS/MS			4.2	0	0	236400	236400	0	0	739480	0	0	0	0	0	0
Semispecific	c164206/1/2366|m.68470	c164206/1/2366|m.68470	c164206/1/2366|m.68470	GAUT4_ARATH^GAUT4_ARATH^Q:45-368,H:118-437^65.741%ID^E:1.67e-150^RecName: Full=Probable galacturonosyltransferase 4;^Eukaryota; Viridiplantae; Streptophyta; Embryophyta; Tracheophyta; Spermatophyta; Magnoliophyta; eudicotyledons; Gunneridae; Pentapetalae; rosids; malvids; Brassicales; Brassicaceae; Camelineae; Arabidopsis	1	1	1		1	1	1	1	0	1	1	0	1	1	0	1	1	2.7	2.7	2.7	43.725	375	375	0	7.071		By matching	By MS/MS	0	2.7	2.7	4983800	0	1029900	3953900	0	0	5380700	0	0	0	0
Semispecific	c164664/1/1395|m.68815	c164664/1/1395|m.68815	c164664/1/1395|m.68815	PAF1_DANRE^PAF1_DANRE^Q:1-277,H:70-340^28.664%ID^E:2.13e-19^RecName: Full=RNA polymerase II-associated factor 1 homolog;^Eukaryota; Metazoa; Chordata; Craniata; Vertebrata; Euteleostomi; Actinopterygii; Neopterygii; Teleostei; Ostariophysi; Cypriniformes; Cyprinidae; Danio	1	1	1		1	1	1	1	0	1	0	0	1	0	0	1	0	5.1	5.1	5.1	40.519	354	354	0.009009	5.0085		By MS/MS		0	5.1	0	11764000	0	11764000	0	0	9031900	0	0	0	0	0
Semispecific	c171152/1/1411|m.73762	c171152/1/1411|m.73762	c171152/1/1411|m.73762	POLX_TOBAC^POLX_TOBAC^Q:2-308,H:106-408^34.395%ID^E:5.5e-49^RecName: Full=Retrovirus-related Pol polyprotein from transposon TNT 1-94;^Eukaryota; Viridiplantae; Streptophyta; Embryophyta; Tracheophyta; Spermatophyta; Magnoliophyta; eudicotyledons; Gunneridae; Pentapetalae; asterids; lamiids; Solanales; Solanaceae; Nicotianoideae; Nicotianeae; Nicotiana	1	1	1		1	1	1	1	1	0	0	1	0	0	1	0	0	5.8	5.8	5.8	34.342	309	309	0.0084034	4.9864	By MS/MS			5.8	0	0	981900	981900	0	0	981900	0	0	0	0	0	0
Semispecific	c200172/1/1948|m.76392	c200172/1/1948|m.76392	c200172/1/1948|m.76392	.	1	1	1		1	1	1	1	0	1	0	0	1	0	0	1	0	3.2	3.2	3.2	60.816	566	566	0.0091743	5.0287		By MS/MS		0	3.2	0	11063000	0	11063000	0	0	8646300	0	0	0	0	0
Semispecific	c204453/1/1413|m.79847	c204453/1/1413|m.79847	c204453/1/1413|m.79847	RENT2_ARATH^RENT2_ARATH^Q:1-227,H:1-222^79.295%ID^E:1.15e-106^RecName: Full=Regulator of nonsense transcripts UPF2;^Eukaryota; Viridiplantae; Streptophyta; Embryophyta; Tracheophyta; Spermatophyta; Magnoliophyta; eudicotyledons; Gunneridae; Pentapetalae; rosids; malvids; Brassicales; Brassicaceae; Camelineae; Arabidopsis	1	1	1		1	1	1	1	1	0	0	1	0	0	1	0	0	6.6	6.6	6.6	31.14	272	272	0.0090909	5.0271	By MS/MS			6.6	0	0	5553900	5553900	0	0	4992900	0	0	0	0	0	0
Semispecific	c212567/1/2355|m.86222	c212567/1/2355|m.86222	c212567/1/2355|m.86222	AB25G_ARATH^AB25G_ARATH^Q:55-536,H:12-484^62.245%ID^E:0^RecName: Full=ABC transporter G family member 25;^Eukaryota; Viridiplantae; Streptophyta; Embryophyta; Tracheophyta; Spermatophyta; Magnoliophyta; eudicotyledons; Gunneridae; Pentapetalae; rosids; malvids; Brassicales; Brassicaceae; Camelineae; Arabidopsis	1	1	1		1	1	1	1	1	1	0	1	1	0	1	1	0	1.7	1.7	1.7	59.01	536	536	0	5.401	By matching	By MS/MS		1.7	1.7	0	9864800	944550	8920200	0	0	6848800	0	0	0	0	0
Semispecific	c215273/1/1762|m.88391	c215273/1/1762|m.88391	c215273/1/1762|m.88391	AROG_ARATH^AROG_ARATH^Q:70-1431,H:30-489^55.579%ID^E:2.3e-153^RecName: Full=Phospho-2-dehydro-3-deoxyheptonate aldolase 2, chloroplastic;^Eukaryota; Viridiplantae; Streptophyta; Embryophyta; Tracheophyta; Spermatophyta; Magnoliophyta; eudicotyledons; Gunneridae; Pentapetalae; rosids; malvids; Brassicales; Brassicaceae; Camelineae; Arabidopsis	1	1	1		1	1	1	1	0	1	0	0	1	0	0	1	0	16.4	16.4	16.4	12.556	110	110	0.0096154	5.0421		By MS/MS		0	16.4	0	3838200	0	3838200	0	0	2946800	0	0	0	0	0
Semispecific	c216545/1/1411|m.89463	c216545/1/1411|m.89463	c216545/1/1411|m.89463	PP2A_TOBAC^PP2A_TOBAC^Q:10-150,H:2-49^83.333%ID^E:5.42e-15^RecName: Full=Serine/threonine-protein phosphatase PP2A catalytic subunit;^Eukaryota; Viridiplantae; Streptophyta; Embryophyta; Tracheophyta; Spermatophyta; Magnoliophyta; eudicotyledons; Gunneridae; Pentapetalae; asterids; lamiids; Solanales; Solanaceae; Nicotianoideae; Nicotianeae; Nicotiana`PP2A_TOBAC^PP2A_TOBAC^Q:1057-1143,H:48-76^96.…	1	1	1		1	1	1	1	1	0	0	1	0	0	1	0	0	7.6	7.6	7.6	13.619	118	118	0	5.3823	By MS/MS			7.6	0	0	4692400	4692400	0	0	14678000	0	0	0	0	0	0
Semispecific	c24533/2/1387|m.15105	c24533/2/1387|m.15105	c24533/2/1387|m.15105	C3H14_ORYSJ^C3H14_ORYSJ^Q:1-295,H:1-293^66.333%ID^E:3.83e-117^RecName: Full=Zinc finger CCCH domain-containing protein 14;^Eukaryota; Viridiplantae; Streptophyta; Embryophyta; Tracheophyta; Spermatophyta; Magnoliophyta; Liliopsida; Poales; Poaceae; BEP clade; Ehrhartoideae; Oryzeae; Oryza	1	1	1		1	1	1	1	1	0	0	1	0	0	1	0	0	5.8	5.8	5.8	32.683	311	311	0.0086207	5.0021	By MS/MS			5.8	0	0	471110	471110	0	0	423520	0	0	0	0	0	0
Semispecific	c260140/1/1773|m.101935	c260140/1/1773|m.101935	c260140/1/1773|m.101935	TADA_ARATH^TADA_ARATH^Q:13-249,H:1068-1307^67.901%ID^E:5.52e-92^RecName: Full=tRNA(adenine(34)) deaminase, chloroplastic;^Eukaryota; Viridiplantae; Streptophyta; Embryophyta; Tracheophyta; Spermatophyta; Magnoliophyta; eudicotyledons; Gunneridae; Pentapetalae; rosids; malvids; Brassicales; Brassicaceae; Camelineae; Arabidopsis	1	1	1		1	1	1	1	0	0	1	0	0	1	0	0	1	7.2	7.2	7.2	28.773	249	249	0.0098039	5.0433			By MS/MS	0	0	7.2	31147000	0	0	31147000	0	0	47517000	0	0	0	0
Semispecific	c304434/1/1715|m.28683	c304434/1/1715|m.28683	c304434/1/1715|m.28683	ANR44_MOUSE^ANR44_MOUSE^Q:32-487,H:144-287^30.519%ID^E:3.17e-10^RecName: Full=Serine/threonine-protein phosphatase 6 regulatory ankyrin repeat subunit B;^Eukaryota; Metazoa; Chordata; Craniata; Vertebrata; Euteleostomi; Mammalia; Eutheria; Euarchontoglires; Glires; Rodentia; Sciurognathi; Muroidea; Muridae; Murinae; Mus; Mus`ANR44_MOUSE^ANR44_MOUSE^Q:489-914,H:318-439^28.169%ID^E:3.17e-10^RecName…	1	1	1		1	1	1	1	0	0	1	0	0	1	0	0	1	6.1	6.1	6.1	31.138	293	293	0.0092593	5.0291			By MS/MS	0	0	6.1	5448200	0	0	5448200	0	0	7387300	0	0	0	0
Semispecific	c338225/2/1518|m.75090	c338225/2/1518|m.75090	c338225/2/1518|m.75090	GGAP1_ARATH^GGAP1_ARATH^Q:8-108,H:19-118^70.297%ID^E:5.5e-44^RecName: Full=GDP-L-galactose phosphorylase 1;^Eukaryota; Viridiplantae; Streptophyta; Embryophyta; Tracheophyta; Spermatophyta; Magnoliophyta; eudicotyledons; Gunneridae; Pentapetalae; rosids; malvids; Brassicales; Brassicaceae; Camelineae; Arabidopsis	1	1	1		1	1	1	1	1	0	0	1	0	0	1	0	0	10.7	10.7	10.7	18.924	168	168	0.0095238	5.0421	By MS/MS			10.7	0	0	25579000	25579000	0	0	77127000	0	0	0	0	0	0
Semispecific	c67296/1/1756|m.35884	c67296/1/1756|m.35884	c67296/1/1756|m.35884	.	1	1	1		1	1	1	1	1	0	0	1	0	0	1	0	0	9	9	9	22.088	200	200	0.0086957	5.0026	By MS/MS			9	0	0	195270	195270	0	0	503010	0	0	0	0	0	0
Semispecific	c75627/1/1333|m.42429	c75627/1/1333|m.42429	c75627/1/1333|m.42429	RGAP7_ARATH^RGAP7_ARATH^Q:72-105,H:73-106^97.059%ID^E:1.38e-13^RecName: Full=Rho GTPase-activating protein 7;^Eukaryota; Viridiplantae; Streptophyta; Embryophyta; Tracheophyta; Spermatophyta; Magnoliophyta; eudicotyledons; Gunneridae; Pentapetalae; rosids; malvids; Brassicales; Brassicaceae; Camelineae; Arabidopsis	1	1	1		1	1	1	1	1	1	1	1	1	1	1	1	1	8.5	8.5	8.5	13.737	118	118	0	5.4083	By matching	By MS/MS	By matching	8.5	8.5	8.5	9800500	2742300	2165800	4892400	0	0	6554900	0	0	0	0
Semispecific	c76566/1/1825|m.43485	c76566/1/1825|m.43485	c76566/1/1825|m.43485	.	1	1	1		1	1	1	1	0	0	1	0	0	1	0	0	1	12.9	12.9	12.9	15.079	140	140	0.0093458	5.0318			By MS/MS	0	0	12.9	3327400	0	0	3327400	0	0	4511700	0	0	0	0
Semispecific	c252729/1/2035|m.96410	c252729/1/2035|m.96410	c252729/1/2035|m.96410	. PREDICTED: uncharacterized protein LOC104903675 [Beta vulgaris subsp. vulgaris]	2	2	2		1	2	2	2	0	2	1	0	2	1	0	2	1	9.2	9.2	9.2	11.691	109	109	0	11.336		By MS/MS	By MS/MS	0	9.2	8.3	88366000	0	54783000	33583000	0	143480000	0	0	6	1	7
Semispecific	NrPAP1	NrPAP1	NrPAP1	Purple acid phosphatase, Lee at al. 2016	2	2	2		1	2	2	2	1	1	1	1	1	1	1	1	1	4.1	4.1	4.1	70.628	640	640	0	14.889	By MS/MS	By matching	By MS/MS	2.2	2.2	1.9	23673000	22072000	1600800	0	35910000	0	0	6	0	1	7
Semispecific	c299607/1/1589|m.90504	c299607/1/1589|m.90504	c299607/1/1589|m.90504	NEP2_NEPGR^NEP2_NEPGR^Q:2-110,H:329-435^49.541%ID^E:1.64e-23^RecName: Full=Aspartic proteinase nepenthesin-2;^Eukaryota; Viridiplantae; Streptophyta; Embryophyta; Tracheophyta; Spermatophyta; Magnoliophyta; eudicotyledons; Gunneridae; Pentapetalae; Caryophyllales; Nepenthaceae; Nepenthes	3	3	3		1	3	3	3	1	0	3	1	0	3	1	0	3	12.3	12.3	12.3	12.374	114	114	0	16.787	By matching		By MS/MS	9.6	0	12.3	26335000	9806300	0	16529000	0	0	23160000	0	0	4	4
Semispecific	c171049/1/1434|m.73671	c171049/1/1434|m.73671	c171049/1/1434|m.73671	LTPG1_ARATH^LTPG1_ARATH^Q:56-150,H:34-132^33.333%ID^E:9.23e-12^RecName: Full=Non-specific lipid transfer protein GPI-anchored 1;^Eukaryota; Viridiplantae; Streptophyta; Embryophyta; Tracheophyta; Spermatophyta; Magnoliophyta; eudicotyledons; Gunneridae; Pentapetalae; rosids; malvids; Brassicales; Brassicaceae; Camelineae; Arabidopsis	7	7	7		1	7	7	7	4	2	5	4	2	5	4	2	5	17.9	17.9	17.9	25.128	224	224	0	142.31	By MS/MS	By MS/MS	By MS/MS	17.9	10.3	11.2	1385700000	17718000	13407000	1354500000	279630000	341730000	1611100000	3	5	35	43
Semispecific	NrNep4	NrNep4	NrNep4	Nepenthesin - 4	7	7	7		1	7	7	7	0	7	0	0	7	0	0	7	0	10.6	10.6	10.6	48.281	445	445	0	323.31		By MS/MS		0	10.6	0	1236500000	0	1236500000	0	0	1571400000	0	0	85	0	85
Semispecific	NrDom1	NrDom1	NrDom1	Heme-binding motif/ glycoside hydrolases, Lee at al. 2016	8	8	8		1	8	8	8	3	5	4	3	5	4	3	5	4	12.2	12.2	12.2	27.784	271	271	0	323.31	By MS/MS	By MS/MS	By MS/MS	7.7	8.1	8.5	291410000	30950000	76245000	184220000	0	220370000	149800000	4	9	18	31
Semispecific	c216973/1/1450|m.89828	c216973/1/1450|m.89828	c216973/1/1450|m.89828	. Npr1 C-terminal peptidase [Nepenthes alata]^90%^E:0 Raff|c24099/1/1496;Hook|c5850/1/1450;ven_illu|TR80436;refPB|c162227/1/1496;refPB|c216973/1/1450;	11	2	2		1	11	2	2	0	11	3	0	2	0	0	2	0	20.4	6.5	6.5	42.817	387	387	0	11.148		By MS/MS	By matching	0	20.4	8.3	3101400	0	3101400	0	0	7225100	0	0	2	0	2
Semispecific	c162227/1/1496|m.66948	c162227/1/1496|m.66948	c162227/1/1496|m.66948	. Neprosin	16	16	0		1	16	16	0	1	16	8	1	16	8	0	0	0	20.2	20.2	0	42.822	387	387	0	323.31	By matching	By MS/MS	By MS/MS	2.6	20.2	15.2	640490000	6330400	302430000	331730000	0	388530000	572600000	0	74	35	109
Semispecific	BAF98919.1;NrChit1	BAF98919.1;NrChit1	BAF98919.1	Chitinase (class IV) (Hatano and Hamada, 2008; Ishisaki et al., 2012b)	1;1	1;1	1;1	;	2	1	1	1	1	0	1	1	0	1	1	0	1	5.1	5.1	5.1	29.027	277	277;279	0	11.716	By matching		By MS/MS	5.1	0	5.1	3868700	460010	0	3408700	0	0	4665800	0	0	4	4
Semispecific	c115595/2/1407|m.50486;c123127/1/1417|m.56162	c115595/2/1407|m.50486;c123127/1/1417|m.56162	c115595/2/1407|m.50486	.	1;1	1;1	1;1	;	2	1	1	1	0	0	1	0	0	1	0	0	1	3.7	3.7	3.7	34.533	323	323;357	0.008	4.9109			By MS/MS	0	0	3.7	0	0	0	0	0	0	0	0	0	1	1
Semispecific	c116138/1/1379|m.50967;c155086/2/1300|m.61321	c116138/1/1379|m.50967;c155086/2/1300|m.61321	c116138/1/1379|m.50967	OPR3_ARATH^OPR3_ARATH^Q:17-102,H:300-385^63.953%ID^E:1.46e-34^RecName: Full=12-oxophytodienoate reductase 3;^Eukaryota; Viridiplantae; Streptophyta; Embryophyta; Tracheophyta; Spermatophyta; Magnoliophyta; eudicotyledons; Gunneridae; Pentapetalae; rosids; malvids; Brassicales; Brassicaceae; Camelineae; Arabidopsis	1;1	1;1	1;1	;	2	1	1	1	1	1	1	1	1	1	1	1	1	8.3	8.3	8.3	12.508	109	109;402	0	5.847	By matching	By MS/MS	By MS/MS	8.3	8.3	8.3	73844000	3394300	821490	69629000	0	0	97008000	0	1	4	5
Semispecific	c30606/1/1441|m.19812;c156794/1/1924|m.62712	c30606/1/1441|m.19812;c156794/1/1924|m.62712	c30606/1/1441|m.19812	OBE4_ARATH^OBE4_ARATH^Q:51-222,H:656-832^42.373%ID^E:1.46e-35^RecName: Full=Protein OBERON 4;^Eukaryota; Viridiplantae; Streptophyta; Embryophyta; Tracheophyta; Spermatophyta; Magnoliophyta; eudicotyledons; Gunneridae; Pentapetalae; rosids; malvids; Brassicales; Brassicaceae; Camelineae; Arabidopsis	1;1	1;1	1;1	;	2	1	1	1	0	0	1	0	0	1	0	0	1	4.7	4.7	4.7	26.841	234	234;453	0	7.2084			By MS/MS	0	0	4.7	0	0	0	0	0	0	0	0	0	3	3
Semispecific	c160360/1/1415|m.65502;c169926/1/1635|m.72819	c160360/1/1415|m.65502;c169926/1/1635|m.72819	c160360/1/1415|m.65502	DRB2_ARATH^DRB2_ARATH^Q:1-273,H:52-349^54.817%ID^E:3.18e-86^RecName: Full=Double-stranded RNA-binding protein 2;^Eukaryota; Viridiplantae; Streptophyta; Embryophyta; Tracheophyta; Spermatophyta; Magnoliophyta; eudicotyledons; Gunneridae; Pentapetalae; rosids; malvids; Brassicales; Brassicaceae; Camelineae; Arabidopsis`DRB2_ARATH^DRB2_ARATH^Q:36-102,H:1-68^44.118%ID^E:6.83e-07^RecName: Full=Double…	1;1	1;1	1;1	;	2	1	1	1	1	0	0	1	0	0	1	0	0	3	3	3	36.566	335	335;386	0	5.5956	By MS/MS			3	0	0	31166000	31166000	0	0	97492000	0	0	1	0	0	1
Semispecific	c31224/1/1651|m.20315;c203103/1/1499|m.78804	c31224/1/1651|m.20315;c203103/1/1499|m.78804	c31224/1/1651|m.20315	CESA8_ARATH^CESA8_ARATH^Q:1-122,H:1-120^52.846%ID^E:1.12e-34^RecName: Full=Cellulose synthase A catalytic subunit 8 [UDP-forming];^Eukaryota; Viridiplantae; Streptophyta; Embryophyta; Tracheophyta; Spermatophyta; Magnoliophyta; eudicotyledons; Gunneridae; Pentapetalae; rosids; malvids; Brassicales; Brassicaceae; Camelineae; Arabidopsis	1;1	1;1	1;1	;	2	1	1	1	1	0	0	1	0	0	1	0	0	9.4	9.4	9.4	13.72	128	128;172	0	6.5103	By MS/MS			9.4	0	0	0	0	0	0	0	0	0	1	0	0	1
Semispecific	c306597/1/1659|m.29697;c253526/1/1523|m.97019	c306597/1/1659|m.29697;c253526/1/1523|m.97019	c306597/1/1659|m.29697	FAO2_LOTJA^FAO2_LOTJA^Q:19-176,H:120-277^53.75%ID^E:1.58e-45^RecName: Full=Long-chain-alcohol oxidase FAO2;^Eukaryota; Viridiplantae; Streptophyta; Embryophyta; Tracheophyta; Spermatophyta; Magnoliophyta; eudicotyledons; Gunneridae; Pentapetalae; rosids; fabids; Fabales; Fabaceae; Papilionoideae; Loteae; Lotus	1;1	1;1	1;1	;	2	1	1	1	0	1	0	0	1	0	0	1	0	5	5	5	20.032	179	179;295	0	6.1881		By MS/MS		0	5	0	26165000	0	26165000	0	0	20089000	0	0	2	0	2
Semispecific	c62140/3/1433|m.32036;c37139/1/1421|m.25581	c62140/3/1433|m.32036;c37139/1/1421|m.25581	c62140/3/1433|m.32036	ESCA_ARATH^ESCA_ARATH^Q:143-294,H:74-234^35.976%ID^E:3.81e-09^RecName: Full=Putative DNA-binding protein ESCAROLA;^Eukaryota; Viridiplantae; Streptophyta; Embryophyta; Tracheophyta; Spermatophyta; Magnoliophyta; eudicotyledons; Gunneridae; Pentapetalae; rosids; malvids; Brassicales; Brassicaceae; Camelineae; Arabidopsis	1;1	1;1	1;1	;	2	1	1	1	0	0	1	0	0	1	0	0	1	2.9	2.9	2.9	38.945	376	376;382	0	5.947			By MS/MS	0	0	2.9	8630400	0	0	8630400	0	0	13164000	0	0	1	1
Semispecific	c118938/1/1511|m.53052;c117941/2/1505|m.52295	c118938/1/1511|m.53052;c117941/2/1505|m.52295	c118938/1/1511|m.53052	MSL9_ARATH^MSL9_ARATH^Q:376-876,H:469-620^31.737%ID^E:1.81e-22^RecName: Full=Mechanosensitive ion channel protein 9;^Eukaryota; Viridiplantae; Streptophyta; Embryophyta; Tracheophyta; Spermatophyta; Magnoliophyta; eudicotyledons; Gunneridae; Pentapetalae; rosids; malvids; Brassicales; Brassicaceae; Camelineae; Arabidopsis	1;1	1;1	1;1	;	2	1	1	1	0	0	1	0	0	1	0	0	1	4.4	4.4	4.4	22.149	183	183;434	0	16.269			By MS/MS	0	0	4.4	12953000	0	0	12953000	0	0	19942000	0	0	0	0
Semispecific	c74891/2/1688|m.41819;c120338/1/1666|m.54121	c74891/2/1688|m.41819;c120338/1/1666|m.54121	c74891/2/1688|m.41819	ERGI3_BOVIN^ERGI3_BOVIN^Q:1-114,H:150-263^59.649%ID^E:8.22e-44^RecName: Full=Endoplasmic reticulum-Golgi intermediate compartment protein 3;^Eukaryota; Metazoa; Chordata; Craniata; Vertebrata; Euteleostomi; Mammalia; Eutheria; Laurasiatheria; Cetartiodactyla; Ruminantia; Pecora; Bovidae; Bovinae; Bos	1;1	1;1	1;1	;	2	1	1	1	1	0	0	1	0	0	1	0	0	12.9	12.9	12.9	15.757	140	140;207	0.010101	5.0944	By MS/MS			12.9	0	0	5532800	5532800	0	0	14252000	0	0	0	0	0	0
Semispecific	c155153/2/1503|m.61403;c166731/1/1351|m.70350	c155153/2/1503|m.61403;c166731/1/1351|m.70350	c155153/2/1503|m.61403	Y319_MYXXA^Y319_MYXXA^Q:142-403,H:48-308^42.586%ID^E:2.92e-62^RecName: Full=Uncharacterized membrane protein STKORF319;^Bacteria; Proteobacteria; Deltaproteobacteria; Myxococcales; Cystobacterineae; Myxococcaceae; Myxococcus	1;1	1;1	1;1	;	2	1	1	1	0	1	0	0	1	0	0	1	0	4.5	4.5	4.5	44.727	403	403;404	0.0097087	5.0427		By MS/MS		0	4.5	0	17632000	0	17632000	0	0	47572000	0	0	0	0	0
Semispecific	c4066/1/1353|m.4091;c252172/1/2567|m.95984	c4066/1/1353|m.4091;c252172/1/2567|m.95984	c4066/1/1353|m.4091	CPY71_ARATH^CPY71_ARATH^Q:1-106,H:295-400^83.019%ID^E:3.67e-55^RecName: Full=Peptidyl-prolyl cis-trans isomerase CYP71;^Eukaryota; Viridiplantae; Streptophyta; Embryophyta; Tracheophyta; Spermatophyta; Magnoliophyta; eudicotyledons; Gunneridae; Pentapetalae; rosids; malvids; Brassicales; Brassicaceae; Camelineae; Arabidopsis	1;1	1;1	1;1	;	2	1	1	1	1	0	1	1	0	1	1	0	1	16.4	16.4	16.4	12.581	110	110;470	0.0083333	4.9864	By MS/MS		By matching	16.4	0	16.4	6881700	6035200	0	846490	5682900	0	0	0	0	0	0
Semispecific	c156954/2/966|m.62833;c296739/1/1005|m.23114	c156954/2/966|m.62833;c296739/1/1005|m.23114	c156954/2/966|m.62833	FLA13_ARATH^FLA13_ARATH^Q:35-245,H:14-226^55.399%ID^E:2.21e-74^RecName: Full=Fasciclin-like arabinogalactan protein 13;^Eukaryota; Viridiplantae; Streptophyta; Embryophyta; Tracheophyta; Spermatophyta; Magnoliophyta; eudicotyledons; Gunneridae; Pentapetalae; rosids; malvids; Brassicales; Brassicaceae; Camelineae; Arabidopsis	2;1	2;1	2;1	;	2	2	2	2	2	2	2	2	2	2	2	2	2	7.5	7.5	7.5	28.148	268	268;268	0	17.104	By MS/MS	By MS/MS	By MS/MS	7.5	7.5	7.5	65697000	719350	55472000	9505500	0	57176000	23049000	2	11	3	16
Semispecific	NrPrx1;c157664/1/1175|m.63356	NrPrx1;c157664/1/1175|m.63356	NrPrx1	Cat. peroxidase 1, Lee at al. 2016	2;2	2;2	2;2	;	2	2	2	2	2	1	1	2	1	1	2	1	1	4.4	4.4	4.4	33.598	317	317;317	0	151.17	By MS/MS	By matching	By MS/MS	4.4	3.5	3.5	23482000	19127000	1870600	2484100	40645000	0	0	7	0	0	7
Semispecific	c78075/1/1822|m.44876;c118535/3/1714|m.52756;c70613/2/1643|m.38444	c78075/1/1822|m.44876;c118535/3/1714|m.52756;c70613/2/1643|m.38444	c78075/1/1822|m.44876	Y3567_ARATH^Y3567_ARATH^Q:13-118,H:308-415^53.211%ID^E:5.62e-30^RecName: Full=BTB/POZ domain-containing protein At3g05675;^Eukaryota; Viridiplantae; Streptophyta; Embryophyta; Tracheophyta; Spermatophyta; Magnoliophyta; eudicotyledons; Gunneridae; Pentapetalae; rosids; malvids; Brassicales; Brassicaceae; Camelineae; Arabidopsis	1;1;1	1;1;1	1;1;1	;;	3	1	1	1	0	1	0	0	1	0	0	1	0	11.9	11.9	11.9	13.393	118	118;242;437	0	6.4339		By MS/MS		0	11.9	0	7289200	0	7289200	0	0	6029700	0	0	1	0	1
Semispecific	c262708/1/2026|m.457;c123394/1/892|m.56355;c34917/1/1549|m.23398	c262708/1/2026|m.457;c123394/1/892|m.56355;c34917/1/1549|m.23398	c262708/1/2026|m.457	D2HDH_ORYSI^D2HDH_ORYSI^Q:1-204,H:353-556^74.51%ID^E:3.41e-107^RecName: Full=Probable D-2-hydroxyglutarate dehydrogenase, mitochondrial;^Eukaryota; Viridiplantae; Streptophyta; Embryophyta; Tracheophyta; Spermatophyta; Magnoliophyta; Liliopsida; Poales; Poaceae; BEP clade; Ehrhartoideae; Oryzeae; Oryza	1;1;1	1;1;1	1;1;1	;;	3	1	1	1	0	0	1	0	0	1	0	0	1	5.9	5.9	5.9	22.805	205	205;218;435	0	5.241			By MS/MS	0	0	5.9	0	0	0	0	0	0	0	0	0	1	1
Semispecific	c209451/1/2512|m.83806;c70490/3/2355|m.38346;c124769/1/1858|m.57377	c209451/1/2512|m.83806;c70490/3/2355|m.38346;c124769/1/1858|m.57377	c209451/1/2512|m.83806	GPDHC_ARATH^GPDHC_ARATH^Q:2-144,H:133-275^90.21%ID^E:8.5e-91^RecName: Full=Glycerol-3-phosphate dehydrogenase [NAD(+)] GPDHC1, cytosolic;^Eukaryota; Viridiplantae; Streptophyta; Embryophyta; Tracheophyta; Spermatophyta; Magnoliophyta; eudicotyledons; Gunneridae; Pentapetalae; rosids; malvids; Brassicales; Brassicaceae; Camelineae; Arabidopsis	1;1;1	1;1;1	1;1;1	;;	3	1	1	1	0	1	0	0	1	0	0	1	0	7.2	7.2	7.2	17.307	152	152;203;264	0.0082645	4.9246		By MS/MS		0	7.2	0	0	0	0	0	0	0	0	0	1	0	1
Semispecific	c160446/1/2287|m.65576;c67949/1/2101|m.36387;c296291/2/2592|m.92379	c160446/1/2287|m.65576;c67949/1/2101|m.36387;c296291/2/2592|m.92379	c160446/1/2287|m.65576	YCF45_ODOSI^YCF45_ODOSI^Q:27-211,H:61-243^64.324%ID^E:9.09e-81^RecName: Full=Uncharacterized protein ycf45;^Eukaryota; Stramenopiles; Bacillariophyta; Mediophyceae; Biddulphiophycidae; Eupodiscales; Eupodiscaceae; Odontella	1;1;1	1;1;1	1;1;1	;;	3	1	1	1	0	0	1	0	0	1	0	0	1	4.1	4.1	4.1	23.59	221	221;538;608	0	5.8454			By MS/MS	0	0	4.1	86847000	0	0	86847000	0	0	138170000	0	0	4	4
Semispecific	c7939/1/1426|m.7672;c169317/3/1470|m.72352;c161028/1/1255|m.66024	c7939/1/1426|m.7672;c169317/3/1470|m.72352;c161028/1/1255|m.66024	c7939/1/1426|m.7672	. hypothetical protein SOVF_087740 [Spinacia oleracea]; nucleolin; transcription initiation factor TFIID subunit 11	1;1;1	1;1;1	1;1;1	;;	3	1	1	1	0	1	1	0	1	1	0	1	1	6.3	6.3	6.3	15.614	142	142;200;200	0	6.2766		By MS/MS	By MS/MS	0	6.3	6.3	264460000	0	164770000	99696000	0	171780000	0	0	6	2	8
Semispecific	c216689/1/1507|m.89586;c306314/1/1848|m.29540;c165203/1/1784|m.69197	c216689/1/1507|m.89586;c306314/1/1848|m.29540;c165203/1/1784|m.69197	c216689/1/1507|m.89586	.	1;1;1	1;1;1	1;1;1	;;	3	1	1	1	0	0	1	0	0	1	0	0	1	7.6	7.6	7.6	20.954	184	184;464;487	0	5.5583			By MS/MS	0	0	7.6	28476000	0	0	28476000	0	0	43534000	0	0	1	1
Semispecific	c246566/1/1314|m.91878;c247506/1/2337|m.92569;c261587/1/2398|m.103078	c246566/1/1314|m.91878;c247506/1/2337|m.92569;c261587/1/2398|m.103078	c246566/1/1314|m.91878	AB9C_ARATH^AB9C_ARATH^Q:546-1115,H:1309-1498^77.895%ID^E:2.92e-95^RecName: Full=ABC transporter C family member 9;^Eukaryota; Viridiplantae; Streptophyta; Embryophyta; Tracheophyta; Spermatophyta; Magnoliophyta; eudicotyledons; Gunneridae; Pentapetalae; rosids; malvids; Brassicales; Brassicaceae; Camelineae; Arabidopsis`AB9C_ARATH^AB9C_ARATH^Q:618-1070,H:696-847^26.797%ID^E:5.12e-10^RecName: Full…	1;1;1	1;1;1	1;1;1	;;	3	1	1	1	1	0	0	1	0	0	1	0	0	7.8	7.8	7.8	13.924	128	128;255;582	0	8.1258	By MS/MS			7.8	0	0	45930000	45930000	0	0	54055000	0	0	2	0	0	2
Semispecific	c306727/1/1235|m.29772;c263229/1/1282|m.6297;c339246/1/1203|m.76638	c306727/1/1235|m.29772;c263229/1/1282|m.6297;c339246/1/1203|m.76638	c306727/1/1235|m.29772	PER1_ARAHY^PER1_ARAHY^Q:1-263,H:54-316^73.004%ID^E:1.44e-138^RecName: Full=Cationic peroxidase 1;^Eukaryota; Viridiplantae; Streptophyta; Embryophyta; Tracheophyta; Spermatophyta; Magnoliophyta; eudicotyledons; Gunneridae; Pentapetalae; rosids; fabids; Fabales; Fabaceae; Papilionoideae; Dalbergieae; Arachis	2;2;1	2;2;1	2;2;1	;;	3	2	2	2	2	2	0	2	2	0	2	2	0	8.4	8.4	8.4	28.276	263	263;327;131	0	228.75	By MS/MS	By matching		8.4	8.4	0	40330000	35076000	5253400	0	55343000	13377000	0	6	0	0	6
Semispecific	c66775/1/1513|m.35521;c112978/1/1334|m.48602;c159345/1/1825|m.64699;c206678/1/1998|m.81625	c66775/1/1513|m.35521;c112978/1/1334|m.48602;c159345/1/1825|m.64699;c206678/1/1998|m.81625	c66775/1/1513|m.35521	DHPS_SYNY3^DHPS_SYNY3^Q:5-114,H:15-121^46.364%ID^E:2.74e-29^RecName: Full=Dihydropteroate synthase;^Bacteria; Cyanobacteria; Oscillatoriophycideae; Chroococcales; Synechocystis	1;1;1;1	1;1;1;1	1;1;1;1	;;;	4	1	1	1	0	0	1	0	0	1	0	0	1	10.1	10.1	10.1	13.447	119	119;119;226;313	0	6.5599			By MS/MS	0	0	10.1	0	0	0	0	0	0	0	0	0	1	1
Semispecific	c62586/1/1509|m.32372;c164331/1/1580|m.68550;c123204/1/1506|m.56230;c1686/4/1376|m.1840	c62586/1/1509|m.32372;c164331/1/1580|m.68550;c123204/1/1506|m.56230;c1686/4/1376|m.1840	c62586/1/1509|m.32372	.	1;1;1;1	1;1;1;1	1;1;1;1	;;;	4	1	1	1	0	1	0	0	1	0	0	1	0	4.4	4.4	4.4	22.923	205	205;223;238;346	0	5.2155		By MS/MS		0	4.4	0	3220600	0	3220600	0	0	10927000	0	0	1	0	1
Semispecific	CON__P48668;CON__P04259;CON__P02538	CON__P48668;CON__P04259;CON__P02538	CON__P48668	#N/A	1;1;1	1;1;1	1;1;1	;;	3	1	1	1	1	0	0	1	0	0	1	0	0	2.1	2.1	2.1	60.024	564	564;564;564	0	18.128	By MS/MS			2.1	0	0	1955900	1955900	0	0	1955900	0	0	1	0	0	1			+
Semispecific	CON__Q9R4J5	CON__Q9R4J5	CON__Q9R4J5	#N/A	1	1	1		1	1	1	1	1	0	0	1	0	0	1	0	0	15.7	15.7	15.7	12.225	108	108	0	91.803	By MS/MS			15.7	0	0	18727000	18727000	0	0	18727000	0	0	4	0	0	4			+
Semispecific	REV__c126723/1/1538|m.58860	REV__c126723/1/1538|m.58860	REV__c126723/1/1538|m.58860	#N/A	1	1	1		1	1	1	1	1	0	0	1	0	0	1	0	0	0	0	0	17.915	156	156	0.010309	5.1165	By MS/MS			0	0	0	31992000	31992000	0	0	82409000	0	0	1	0	0	1		+
Semispecific	c204724/1/1592|m.80057;c125053/1/2355|m.57575;c75803/2/1273|m.42646;c161592/1/2294|m.66452	c204724/1/1592|m.80057;c125053/1/2355|m.57575;c75803/2/1273|m.42646;c161592/1/2294|m.66452	c204724/1/1592|m.80057	COI1_ARATH^COI1_ARATH^Q:1-199,H:390-588^69.347%ID^E:2.43e-94^RecName: Full=Coronatine-insensitive protein 1;^Eukaryota; Viridiplantae; Streptophyta; Embryophyta; Tracheophyta; Spermatophyta; Magnoliophyta; eudicotyledons; Gunneridae; Pentapetalae; rosids; malvids; Brassicales; Brassicaceae; Camelineae; Arabidopsis	1;1;1;1	1;1;1;1	1;1;1;1	;;;	4	1	1	1	0	0	1	0	0	1	0	0	1	10.7	10.7	10.7	22.958	206	206;279;334;505	0	5.3458			By MS/MS	0	0	10.7	0	0	0	0	0	0	0	0	0	1	1
Semispecific	c168477/1/1375|m.71681;c213269/1/1309|m.86785;c208754/1/1544|m.83240;c9253/2/1442|m.8944	c168477/1/1375|m.71681;c213269/1/1309|m.86785;c208754/1/1544|m.83240;c9253/2/1442|m.8944	c168477/1/1375|m.71681	TRXB2_ARATH^TRXB2_ARATH^Q:26-189,H:87-254^57.143%ID^E:3.11e-56^RecName: Full=Thioredoxin reductase 2;^Eukaryota; Viridiplantae; Streptophyta; Embryophyta; Tracheophyta; Spermatophyta; Magnoliophyta; eudicotyledons; Gunneridae; Pentapetalae; rosids; malvids; Brassicales; Brassicaceae; Camelineae; Arabidopsis	1;1;1;1	1;1;1;1	1;1;1;1	;;;	4	1	1	1	0	1	0	0	1	0	0	1	0	8.3	8.3	8.3	21.205	192	192;300;329;346	0	5.6634		By MS/MS		0	8.3	0	0	0	0	0	0	0	0	0	1	0	1
Semispecific	c8436/4/1474|m.8175;c42636/7/1618|m.28861;c263341/1/1645|m.29524;c23961/7/1609|m.14519	c8436/4/1474|m.8175;c42636/7/1618|m.28861;c263341/1/1645|m.29524;c23961/7/1609|m.14519	c8436/4/1474|m.8175	Y5713_ARATH^Y5713_ARATH^Q:26-359,H:35-368^57.186%ID^E:3.25e-145^RecName: Full=PI-PLC X domain-containing protein At5g67130;^Eukaryota; Viridiplantae; Streptophyta; Embryophyta; Tracheophyta; Spermatophyta; Magnoliophyta; eudicotyledons; Gunneridae; Pentapetalae; rosids; malvids; Brassicales; Brassicaceae; Camelineae; Arabidopsis	1;1;1;1	1;1;1;1	1;1;1;1	;;;	4	1	1	1	0	1	1	0	1	1	0	1	1	2.8	2.8	2.8	46.055	423	423;423;423;423	0	9.7815		By matching	By MS/MS	0	2.8	2.8	13465000	0	1869100	11596000	0	0	18632000	0	0	2	2
Semispecific	c200842/1/1700|m.76960;c215584/1/1535|m.88655;c6757/2/1488|m.6561;c33869/1/1431|m.22391	c200842/1/1700|m.76960;c215584/1/1535|m.88655;c6757/2/1488|m.6561;c33869/1/1431|m.22391	c200842/1/1700|m.76960	.	1;1;1;1	1;1;1;1	1;1;1;1	;;;	4	1	1	1	1	0	0	1	0	0	1	0	0	8.7	8.7	8.7	22.199	207	207;348;365;365	0.009434	5.0325	By MS/MS			8.7	0	0	3585900	3585900	0	0	3223700	0	0	0	0	0	0
Semispecific	c218739/9/1470|m.89940;c165535/1/1551|m.69432;c16496/4/1483|m.14164;NrNep3	c218739/9/1470|m.89940;c165535/1/1551|m.69432;c16496/4/1483|m.14164;NrNep3	c218739/9/1470|m.89940	NEP2_NEPGR^NEP2_NEPGR^Q:1-439,H:1-435^52.027%ID^E:4.27e-143^RecName: Full=Aspartic proteinase nepenthesin-2;^Eukaryota; Viridiplantae; Streptophyta; Embryophyta; Tracheophyta; Spermatophyta; Magnoliophyta; eudicotyledons; Gunneridae; Pentapetalae; Caryophyllales; Nepenthaceae; Nepenthes	5;4;3;3	5;4;3;3	5;4;3;3	;;;	4	5	5	5	5	3	2	5	3	2	5	3	2	10.6	10.6	10.6	48.31	442	442;442;321;442	0	33.27	By MS/MS	By MS/MS	By MS/MS	10.6	7	4.5	123350000	83113000	16013000	24223000	107820000	99694000	47015000	9	3	2	14
Semispecific	c68976/4/1377|m.37184;c257365/1/1314|m.99929;c257365/1/1314|m.99930;NrNpr2(partial)	c68976/4/1377|m.37184;c257365/1/1314|m.99929	c68976/4/1377|m.37184	. Neprosin	5;3;2;2	5;3;2;2	5;3;2;2	;	4	5	5	5	0	5	1	0	5	1	0	5	1	12.9	12.9	12.9	42.083	381	381;231;143;304	0	323.31		By MS/MS	By MS/MS	0	12.9	5.5	304890000	0	300270000	4626300	0	435340000	0	0	63	2	65
Semispecific	CON__P12763	CON__P12763	CON__P12763	#N/A	2	2	2		1	2	2	2	2	0	0	2	0	0	2	0	0	9.7	9.7	9.7	38.418	359	359	0	59.73	By MS/MS			9.7	0	0	5360200	5360200	0	0	16767000	0	0	5	0	0	5			+
Semispecific	NrNpr1;c67319/4/1340|m.35905;c216517/1/1493|m.89426;c127800/1/1189|m.59651	NrNpr1;c67319/4/1340|m.35905	NrNpr1	Neprosin-1	13;13;2;2	1;1;0;0	1;1;0;0	;	4	13	1	1	1	13	8	0	1	0	0	1	0	19.9	3.9	3.9	42.788	387	387;387;147;164	0	98.677	By matching	By MS/MS	By matching	2.6	19.9	15.2	19281000	0	19281000	0	0	12604000	0	0	7	0	7
Semispecific	CON__P35527	CON__P35527	CON__P35527	#N/A	3	3	3		1	3	3	3	2	1	3	2	1	3	2	1	3	4.8	4.8	4.8	62.129	623	623	0	153.39	By MS/MS	By MS/MS	By MS/MS	4.3	2.6	4.8	23174000	10782000	7314100	5077800	19604000	0	5227300	6	7	3	16			+
Semispecific	c14338/1/1189|m.13336;c262047/1/1852|m.103425;c61101/4/2217|m.31042;c204857/2/2246|m.80163;c127164/1/1969|m.59188	c14338/1/1189|m.13336;c262047/1/1852|m.103425;c61101/4/2217|m.31042;c204857/2/2246|m.80163;c127164/1/1969|m.59188	c14338/1/1189|m.13336	MNS1_ARATH^MNS1_ARATH^Q:3-329,H:234-557^80.793%ID^E:0^RecName: Full=Mannosyl-oligosaccharide 1,2-alpha-mannosidase MNS1;^Eukaryota; Viridiplantae; Streptophyta; Embryophyta; Tracheophyta; Spermatophyta; Magnoliophyta; eudicotyledons; Gunneridae; Pentapetalae; rosids; malvids; Brassicales; Brassicaceae; Camelineae; Arabidopsis	1;1;1;1;1	1;1;1;1;1	1;1;1;1;1	;;;;	5	1	1	1	0	1	0	0	1	0	0	1	0	5.5	5.5	5.5	37.375	329	329;430;553;553;553	0.0087719	5.0073		By MS/MS		0	5.5	0	19825000	0	19825000	0	0	15737000	0	0	0	0	0
Semispecific	c69271/1/1366|m.37432;c73123/4/1538|m.40479;NrNep1;c62517/2/1578|m.32343;BAD07474.1	c69271/1/1366|m.37432;c73123/4/1538|m.40479;NrNep1;c62517/2/1578|m.32343;BAD07474.1	c69271/1/1366|m.37432	NEP1_NEPGR^NEP1_NEPGR^Q:1-118,H:221-342^77.049%ID^E:2.29e-53^RecName: Full=Aspartic proteinase nepenthesin-1;^Eukaryota; Viridiplantae; Streptophyta; Embryophyta; Tracheophyta; Spermatophyta; Magnoliophyta; eudicotyledons; Gunneridae; Pentapetalae; Caryophyllales; Nepenthaceae; Nepenthes	2;2;1;1;1	2;2;1;1;1	2;2;1;1;1	;;;;	5	2	2	2	0	2	1	0	2	1	0	2	1	14.5	14.5	14.5	14.633	131	131;316;437;437;437	0	13.931		By MS/MS	By MS/MS	0	14.5	7.6	78646000	0	64892000	13754000	0	62922000	0	0	7	5	12
Semispecific	c126618/1/2038|m.58778;c249340/1/1807|m.93852;c38009/1/1678|m.26413;c201926/1/1802|m.77801;c202650/2/1973|m.78392;c1047/7/1924|m.982	c126618/1/2038|m.58778;c249340/1/1807|m.93852;c38009/1/1678|m.26413;c201926/1/1802|m.77801;c202650/2/1973|m.78392;c1047/7/1924|m.982	c126618/1/2038|m.58778	TCPZB_ARATH^TCPZB_ARATH^Q:1-88,H:1-88^93.182%ID^E:1.87e-48^RecName: Full=T-complex protein 1 subunit zeta 2 {ECO:0000303|PubMed:11599560};^Eukaryota; Viridiplantae; Streptophyta; Embryophyta; Tracheophyta; Spermatophyta; Magnoliophyta; eudicotyledons; Gunneridae; Pentapetalae; rosids; malvids; Brassicales; Brassicaceae; Camelineae; Arabidopsis	1;1;1;1;1;1	1;1;1;1;1;1	1;1;1;1;1;1	;;;;;	6	1	1	1	0	0	1	0	0	1	0	0	1	8.7	8.7	8.7	11.205	104	104;260;341;362;535;535	0	5.2192			By MS/MS	0	0	8.7	38985000	0	0	38985000	0	0	59701000	0	0	1	1
Semispecific	c14126/3/1764|m.13163;c214708/1/2365|m.87961;c215699/1/1880|m.88744;c253725/1/1481|m.97155;c1769/3/1587|m.1951;c165426/3/1526|m.69346	c14126/3/1764|m.13163;c214708/1/2365|m.87961;c215699/1/1880|m.88744;c253725/1/1481|m.97155;c1769/3/1587|m.1951;c165426/3/1526|m.69346	c14126/3/1764|m.13163	NADC_ARATH^NADC_ARATH^Q:6-163,H:34-191^79.747%ID^E:1.46e-84^RecName: Full=Nicotinate-nucleotide pyrophosphorylase [carboxylating], chloroplastic;^Eukaryota; Viridiplantae; Streptophyta; Embryophyta; Tracheophyta; Spermatophyta; Magnoliophyta; eudicotyledons; Gunneridae; Pentapetalae; rosids; malvids; Brassicales; Brassicaceae; Camelineae; Arabidopsis	1;1;1;1;1;1	1;1;1;1;1;1	1;1;1;1;1;1	;;;;;	6	1	1	1	0	0	1	0	0	1	0	0	1	13.3	13.3	13.3	18.693	173	173;190;205;217;320;320	0	9.0451			By MS/MS	0	0	13.3	0	0	0	0	0	0	0	0	0	1	1
Semispecific	c71179/1/1709|m.38882;c4593/1/1675|m.4595;c71964/1/1702|m.39579;c7783/1/1491|m.7525;c167380/1/1721|m.70837;c166230/1/1641|m.69957	c71179/1/1709|m.38882;c4593/1/1675|m.4595;c71964/1/1702|m.39579;c7783/1/1491|m.7525;c167380/1/1721|m.70837;c166230/1/1641|m.69957	c71179/1/1709|m.38882	SERC1_MOUSE^SERC1_MOUSE^Q:1137-1367,H:373-447^33.766%ID^E:1.28e-07^RecName: Full=Serine incorporator 1;^Eukaryota; Metazoa; Chordata; Craniata; Vertebrata; Euteleostomi; Mammalia; Eutheria; Euarchontoglires; Glires; Rodentia; Sciurognathi; Muroidea; Muridae; Murinae; Mus; Mus	1;1;1;1;1;1	1;1;1;1;1;1	1;1;1;1;1;1	;;;;;	6	1	1	1	0	1	0	0	1	0	0	1	0	8.6	8.6	8.6	13.185	116	116;117;284;369;397;397	0	5.5893		By MS/MS		0	8.6	0	16765000	0	16765000	0	0	25423000	0	0	3	0	3
Semispecific	CON__P04264;CON__ENSEMBL:ENSBTAP00000038253;CON__Q9R0H5;CON__Q6NXH9;CON__Q6IFZ6;CON__Q7Z794;CON__P35908	CON__P04264	CON__P04264	#N/A	8;2;1;1;1;1;1	8;2;1;1;1;1;1	8;2;1;1;1;1;1		7	8	8	8	3	2	6	3	2	6	3	2	6	15.2	15.2	15.2	66.017	644	644;606;524;539;572;578;645	0	323.31	By MS/MS	By MS/MS	By MS/MS	6.8	2.5	11.8	47070000	3395700	4418000	39256000	0	0	61527000	6	2	17	25			+
Semispecific	c246205/2/1415|m.91463;c249735/2/1519|m.94129;c13710/2/1489|m.12793;c337833/4/1456|m.74818;c246198/7/1528|m.91461;c245485/24/1566|m.91217;c208233/1/1576|m.82871	c246205/2/1415|m.91463;c249735/2/1519|m.94129;c13710/2/1489|m.12793;c337833/4/1456|m.74818;c246198/7/1528|m.91461;c245485/24/1566|m.91217;c208233/1/1576|m.82871	c246205/2/1415|m.91463	IDH3_ARATH^IDH3_ARATH^Q:1-173,H:1-165^76.879%ID^E:6.16e-89^RecName: Full=Isocitrate dehydrogenase [NAD] regulatory subunit 3, mitochondrial;^Eukaryota; Viridiplantae; Streptophyta; Embryophyta; Tracheophyta; Spermatophyta; Magnoliophyta; eudicotyledons; Gunneridae; Pentapetalae; rosids; malvids; Brassicales; Brassicaceae; Camelineae; Arabidopsis	1;1;1;1;1;1;1	1;1;1;1;1;1;1	1;1;1;1;1;1;1	;;;;;;	7	1	1	1	0	1	0	0	1	0	0	1	0	8.4	8.4	8.4	19.512	179	179;304;304;371;371;376;395	0	7.3449		By MS/MS		0	8.4	0	0	0	0	0	0	0	0	0	1	0	1
Semispecific	CON__P00761;CON__P07477	CON__P00761	CON__P00761	#N/A	11;3	11;3	11;3		2	11	11	11	9	6	6	9	6	6	9	6	6	22.9	22.9	22.9	24.409	231	231;247	0	252.42	By MS/MS	By MS/MS	By MS/MS	22.9	19	22.9	1468000000	118870000	857450000	491680000	522240000	893600000	649910000	16	13	23	52			+
Semispecific	c298556/1/1965|m.24845;c78223/1/1327|m.44998;c306560/1/1625|m.29668;c128690/1/1622|m.60288;c199599/2/1415|m.75853;c218855/3/1658|m.89978;c14219/2/1554|m.13251;c1722/5/1817|m.1889	c298556/1/1965|m.24845;c78223/1/1327|m.44998;c306560/1/1625|m.29668;c128690/1/1622|m.60288;c199599/2/1415|m.75853;c218855/3/1658|m.89978;c14219/2/1554|m.13251;c1722/5/1817|m.1889	c298556/1/1965|m.24845	SCP51_ARATH^SCP51_ARATH^Q:2-83,H:339-420^63.415%ID^E:2.4e-29^RecName: Full=Serine carboxypeptidase-like 51;^Eukaryota; Viridiplantae; Streptophyta; Embryophyta; Tracheophyta; Spermatophyta; Magnoliophyta; eudicotyledons; Gunneridae; Pentapetalae; rosids; malvids; Brassicales; Brassicaceae; Camelineae; Arabidopsis	1;1;1;1;1;1;1;1	1;1;1;1;1;1;1;1	1;1;1;1;1;1;1;1	;;;;;;;	8	1	1	1	0	1	0	0	1	0	0	1	0	9	9	9	12.267	111	111;191;191;257;459;470;470;528	0	5.689		By MS/MS		0	9	0	6516800	0	6516800	0	0	13179000	0	0	0	0	0
Semispecific	c2119/1/1601|m.2363;c354291/1/1773|m.46478;c36042/1/1722|m.24496;c9974/1/1630|m.9595;c134290/5/1540|m.60768;c128572/2/1476|m.60187;c2981/1/1792|m.3138;c169614/1/1355|m.72575;c167769/1/1680|m.71135;c3900/1/1060|m.3955;c244224/1/1458|m.91182;c74343/1/1744|m.41394;c281514/1/1389|m.14337;c34407/2/1571|m.22930;c155263/1/1302|m.61510;c7047/4/1558|m.6835;c253832/1/1730|m.97236;c28599/1/1714|m.18219;c247…	c2119/1/1601|m.2363;c354291/1/1773|m.46478;c36042/1/1722|m.24496;c9974/1/1630|m.9595;c134290/5/1540|m.60768;c128572/2/1476|m.60187;c2981/1/1792|m.3138;c169614/1/1355|m.72575;c167769/1/1680|m.71135;c3900/1/1060|m.3955;c244224/1/1458|m.91182;c74343/1/1744|m.41394;c281514/1/1389|m.14337;c34407/2/1571|m.22930;c155263/1/1302|m.61510;c7047/4/1558|m.6835;c253832/1/1730|m.97236;c28599/1/1714|m.18219;c247…	c2119/1/1601|m.2363	EF1A_SOYBN^EF1A_SOYBN^Q:1-122,H:148-269^95.902%ID^E:1.18e-79^RecName: Full=Elongation factor 1-alpha;^Eukaryota; Viridiplantae; Streptophyta; Embryophyta; Tracheophyta; Spermatophyta; Magnoliophyta; eudicotyledons; Gunneridae; Pentapetalae; rosids; fabids; Fabales; Fabaceae; Papilionoideae; Phaseoleae; Glycine; Soja	1;1;1;1;1;1;1;1;1;1;1;1;1;1;1;1;1;1;1;1;1;1;1;1;1;1;1;1;1;1;1;1;1;1;1;1;1;1;1;1;1;1;1;1;1;1;1;1;1;1;1;1;1;1;1;1;1	1;1;1;1;1;1;1;1;1;1;1;1;1;1;1;1;1;1;1;1;1;1;1;1;1;1;1;1;1;1;1;1;1;1;1;1;1;1;1;1;1;1;1;1;1;1;1;1;1;1;1;1;1;1;1;1;1	1;1;1;1;1;1;1;1;1;1;1;1;1;1;1;1;1;1;1;1;1;1;1;1;1;1;1;1;1;1;1;1;1;1;1;1;1;1;1;1;1;1;1;1;1;1;1;1;1;1;1;1;1;1;1;1;1	;;;;;;;;;;;;;;;;;;;;;;;;;;;;;;;;;;;;;;;;;;;;;;;;;;;;;;;;	57	1	1	1	0	0	1	0	0	1	0	0	1	8.8	8.8	8.8	13.873	125	125;142;148;163;163;166;173;185;193;205;214;233;243;248;248;249;264;285;294;327;331;350;355;357;370;384;387;387;400;408;411;413;415;415;417;431;446;448;448;448;448;448;448;448;448;449;449;449;449;449;449;449;451;458;459;491;508	0	9.5983			By MS/MS	0	0	8.8	0	0	0	0	0	0	0	0	0	1	1
Unspecific	BAM28606.1	BAM28606.1	BAM28606.1	#N/A	1	1	1		1	1	1	1	0	0	1	0	0	1	0	0	1	3.2	3.2	3.2	36.251	340	340	0	1.9754			By MS/MS	0	0	3.2	3937400	0	0	3937400	0	0	9841100	0	0	1	1
Unspecific	c111348/1/1224|m.47478	c111348/1/1224|m.47478	c111348/1/1224|m.47478	. Blastp NADH:flavin oxidoreductase/NADH oxidase [Lysobacter enzymogenes]^30%ID^E:1.4	1	1	1		1	1	1	1	1	1	1	1	1	1	1	1	1	6.6	6.6	6.6	14.889	137	137	0.013158	0.24396	By matching	By MS/MS	By MS/MS	6.6	6.6	6.6	742080000	22406000	654220000	65456000	0	1347000000	0	0	7	1	8
Unspecific	c112495/1/1613|m.48266	c112495/1/1613|m.48266	c112495/1/1613|m.48266	IPCS1_ARATH^IPCS1_ARATH^Q:43-126,H:75-159^54.118%ID^E:4.08e-22^RecName: Full=Phosphatidylinositol:ceramide inositolphosphotransferase 1;^Eukaryota; Viridiplantae; Streptophyta; Embryophyta; Tracheophyta; Spermatophyta; Magnoliophyta; eudicotyledons; Gunneridae; Pentapetalae; rosids; malvids; Brassicales; Brassicaceae; Camelineae; Arabidopsis	1	1	1		1	1	1	1	0	1	0	0	1	0	0	1	0	6.2	6.2	6.2	15.165	128	128	0	22.23		By MS/MS		0	6.2	0	14248000	0	14248000	0	0	20793000	0	0	1	0	1
Unspecific	c113297/1/925|m.48841	c113297/1/925|m.48841	c113297/1/925|m.48841	PDCB3_ARATH^PDCB3_ARATH^Q:13-190,H:1-178^43.243%ID^E:2.06e-34^RecName: Full=PLASMODESMATA CALLOSE-BINDING PROTEIN 3;^Eukaryota; Viridiplantae; Streptophyta; Embryophyta; Tracheophyta; Spermatophyta; Magnoliophyta; eudicotyledons; Gunneridae; Pentapetalae; rosids; malvids; Brassicales; Brassicaceae; Camelineae; Arabidopsis	1	1	1		1	1	1	1	0	0	1	0	0	1	0	0	1	6.6	6.6	6.6	20.367	197	197	0.012987	0.23609			By MS/MS	0	0	6.6	0	0	0	0	0	0	0	0	0	1	1
Unspecific	c114505/1/1264|m.49694	c114505/1/1264|m.49694	c114505/1/1264|m.49694	CYSEP_VIGMU^CYSEP_VIGMU^Q:17-91,H:51-123^65.333%ID^E:3.75e-27^RecName: Full=Vignain;^Eukaryota; Viridiplantae; Streptophyta; Embryophyta; Tracheophyta; Spermatophyta; Magnoliophyta; eudicotyledons; Gunneridae; Pentapetalae; rosids; fabids; Fabales; Fabaceae; Papilionoideae; Phaseoleae; Vigna	1	1	1		1	1	1	1	1	0	0	1	0	0	1	0	0	10	10	10	19.994	170	170	0.011494	0.071915	By MS/MS			10	0	0	12643000	12643000	0	0	34435000	0	0	1	0	0	1
Unspecific	c117718/1/1371|m.52112	c117718/1/1371|m.52112	c117718/1/1371|m.52112	. hypothetical protein M427DRAFT_97202 [Gonapodya prolifera JEL478]^E:3.6^ 39%	1	1	1		1	1	1	1	0	1	0	0	1	0	0	1	0	14	14	14	10.627	100	100	0	0.72661		By MS/MS		0	14	0	23862000	0	23862000	0	0	29698000	0	0	1	0	1
Unspecific	c11776/1/1564|m.11174	c11776/1/1564|m.11174	c11776/1/1564|m.11174	LYM1_ARATH^LYM1_ARATH^Q:4-261,H:5-259^75.194%ID^E:4.69e-135^RecName: Full=LysM domain-containing GPI-anchored protein 1;^Eukaryota; Viridiplantae; Streptophyta; Embryophyta; Tracheophyta; Spermatophyta; Magnoliophyta; eudicotyledons; Gunneridae; Pentapetalae; rosids; malvids; Brassicales; Brassicaceae; Camelineae; Arabidopsis	1	1	1		1	1	1	1	0	1	1	0	1	1	0	1	1	3.8	3.8	3.8	33.227	314	314	0	0.48665		By MS/MS	By MS/MS	0	3.8	3.8	31055000	0	31055000	0	0	75866000	0	0	5	1	6
Unspecific	c120743/2/1801|m.54412	c120743/2/1801|m.54412	c120743/2/1801|m.54412	FBK69_ARATH^FBK69_ARATH^Q:311-1261,H:5-311^33.739%ID^E:2.77e-21^RecName: Full=F-box/kelch-repeat protein At3g24760;^Eukaryota; Viridiplantae; Streptophyta; Embryophyta; Tracheophyta; Spermatophyta; Magnoliophyta; eudicotyledons; Gunneridae; Pentapetalae; rosids; malvids; Brassicales; Brassicaceae; Camelineae; Arabidopsis`FBK69_ARATH^FBK69_ARATH^Q:616-1398,H:102-360^32.432%ID^E:3.67e-20^RecName: F…	1	1	1		1	1	1	1	1	0	0	1	0	0	1	0	0	16	16	16	11.374	100	100	0	0.5182	By MS/MS			16	0	0	9554100	9554100	0	0	40672000	0	0	1	0	0	1
Unspecific	c13232/3/1223|m.12394	c13232/3/1223|m.12394	c13232/3/1223|m.12394	UBAX1_ARATH^UBAX1_ARATH^Q:10-295,H:128-421^56.902%ID^E:2.41e-103^RecName: Full=UBA and UBX domain-containing protein At4g15410;^Eukaryota; Viridiplantae; Streptophyta; Embryophyta; Tracheophyta; Spermatophyta; Magnoliophyta; eudicotyledons; Gunneridae; Pentapetalae; rosids; malvids; Brassicales; Brassicaceae; Camelineae; Arabidopsis	1	1	1		1	1	1	1	0	1	1	0	1	1	0	1	1	4.1	4.1	4.1	31.763	295	295	0	0.39445		By matching	By MS/MS	0	4.1	4.1	2459400	0	518030	1941400	0	0	4596300	0	0	1	1
Unspecific	c155321/1/2342|m.61563	c155321/1/2342|m.61563	c155321/1/2342|m.61563	CYPR4_CYNCA^CYPR4_CYNCA^Q:4-133,H:334-465^72.932%ID^E:2.38e-61^RecName: Full=Protein CYPRO4;^Eukaryota; Viridiplantae; Streptophyta; Embryophyta; Tracheophyta; Spermatophyta; Magnoliophyta; eudicotyledons; Gunneridae; Pentapetalae; asterids; campanulids; Asterales; Asteraceae; Carduoideae; Cardueae; Carduinae; Cynara	1	1	1		1	1	1	1	0	0	1	0	0	1	0	0	1	13.4	13.4	13.4	17.089	149	149	0.012195	0.11657			By MS/MS	0	0	13.4	15157000	0	0	15157000	0	0	13605000	0	0	1	1
Unspecific	c155751/1/2569|m.61875	c155751/1/2569|m.61875	c155751/1/2569|m.61875	ARK3_ARATH^ARK3_ARATH^Q:12-150,H:178-315^69.065%ID^E:1.07e-56^RecName: Full=Armadillo repeat-containing kinesin-like protein 3;^Eukaryota; Viridiplantae; Streptophyta; Embryophyta; Tracheophyta; Spermatophyta; Magnoliophyta; eudicotyledons; Gunneridae; Pentapetalae; rosids; malvids; Brassicales; Brassicaceae; Camelineae; Arabidopsis	1	1	1		1	1	1	1	1	0	0	1	0	0	1	0	0	11.3	11.3	11.3	16.845	151	151	0.012821	0.23055	By MS/MS			11.3	0	0	51987000	51987000	0	0	140700000	0	0	1	0	0	1
Unspecific	c159941/3/1210|m.65191	c159941/3/1210|m.65191	c159941/3/1210|m.65191	OLE96_ARATH^OLE96_ARATH^Q:15-118,H:19-119^31.429%ID^E:8.19e-06^RecName: Full=Pollen-specific protein-like At4g18596;^Eukaryota; Viridiplantae; Streptophyta; Embryophyta; Tracheophyta; Spermatophyta; Magnoliophyta; eudicotyledons; Gunneridae; Pentapetalae; rosids; malvids; Brassicales; Brassicaceae; Camelineae; Arabidopsis	1	1	1		1	1	1	1	0	0	1	0	0	1	0	0	1	4.6	4.6	4.6	35.69	326	326	0	0.5804			By MS/MS	0	0	4.6	39779000	0	0	39779000	0	0	14274000	0	0	1	1
Unspecific	c160282/1/1738|m.65448	c160282/1/1738|m.65448	c160282/1/1738|m.65448	E133_ARATH^E133_ARATH^Q:48-493,H:23-445^42%ID^E:1.53e-123^RecName: Full=Glucan endo-1,3-beta-glucosidase 3;^Eukaryota; Viridiplantae; Streptophyta; Embryophyta; Tracheophyta; Spermatophyta; Magnoliophyta; eudicotyledons; Gunneridae; Pentapetalae; rosids; malvids; Brassicales; Brassicaceae; Camelineae; Arabidopsis	1	1	1		1	1	1	1	0	0	1	0	0	1	0	0	1	3.6	3.6	3.6	53.756	496	496	0	0.48088			By MS/MS	0	0	3.6	0	0	0	0	0	0	0	0	0	1	1
Unspecific	c162998/1/2361|m.67515	c162998/1/2361|m.67515	c162998/1/2361|m.67515	BAG3_ARATH^BAG3_ARATH^Q:714-983,H:64-153^63.333%ID^E:1.14e-38^RecName: Full=BAG family molecular chaperone regulator 3;^Eukaryota; Viridiplantae; Streptophyta; Embryophyta; Tracheophyta; Spermatophyta; Magnoliophyta; eudicotyledons; Gunneridae; Pentapetalae; rosids; malvids; Brassicales; Brassicaceae; Camelineae; Arabidopsis`BAG3_ARATH^BAG3_ARATH^Q:580-726,H:21-67^59.184%ID^E:1.14e-38^RecName: Fu…	1	1	1		1	1	1	1	0	0	1	0	0	1	0	0	1	12.4	12.4	12.4	11.703	105	105	0	8.3827			By MS/MS	0	0	12.4	37472000	0	0	37472000	0	0	95079000	0	0	1	1
Unspecific	c164173/1/2495|m.68441	c164173/1/2495|m.68441	c164173/1/2495|m.68441	ALG8_ARATH^ALG8_ARATH^Q:61-134,H:12-85^74.324%ID^E:1.38e-29^RecName: Full=Probable dolichyl pyrophosphate Glc1Man9GlcNAc2 alpha-1,3-glucosyltransferase;^Eukaryota; Viridiplantae; Streptophyta; Embryophyta; Tracheophyta; Spermatophyta; Magnoliophyta; eudicotyledons; Gunneridae; Pentapetalae; rosids; malvids; Brassicales; Brassicaceae; Camelineae; Arabidopsis	1	1	1		1	1	1	1	0	1	0	0	1	0	0	1	0	6.6	6.6	6.6	15.472	136	136	0	0.29593		By MS/MS		0	6.6	0	12241000	0	12241000	0	0	15234000	0	0	2	0	2
Unspecific	c167759/1/1631|m.71132	c167759/1/1631|m.71132	c167759/1/1631|m.71132	UKL1_ARATH^UKL1_ARATH^Q:70-248,H:58-236^81.006%ID^E:6.42e-95^RecName: Full=Uridine kinase-like protein 1, chloroplastic;^Eukaryota; Viridiplantae; Streptophyta; Embryophyta; Tracheophyta; Spermatophyta; Magnoliophyta; eudicotyledons; Gunneridae; Pentapetalae; rosids; malvids; Brassicales; Brassicaceae; Camelineae; Arabidopsis	1	1	1		1	1	1	1	0	1	0	0	1	0	0	1	0	4.8	4.8	4.8	28.688	251	251	0	0.35362		By MS/MS		0	4.8	0	17900000	0	17900000	0	0	38553000	0	0	3	0	3
Unspecific	c1688/2/1438|m.1842	c1688/2/1438|m.1842	c1688/2/1438|m.1842	AGAL_COFAR^AGAL_COFAR^Q:66-433,H:11-377^61.685%ID^E:3.27e-169^RecName: Full=Alpha-galactosidase;^Eukaryota; Viridiplantae; Streptophyta; Embryophyta; Tracheophyta; Spermatophyta; Magnoliophyta; eudicotyledons; Gunneridae; Pentapetalae; asterids; lamiids; Gentianales; Rubiaceae; Ixoroideae; Coffeeae; Coffea	1	1	1		1	1	1	1	1	0	0	1	0	0	1	0	0	3.2	3.2	3.2	48.2	435	435	0.0125	0.14854	By MS/MS			3.2	0	0	7751700	7751700	0	0	10699000	0	0	1	0	0	1
Unspecific	c170173/1/1992|m.73018	c170173/1/1992|m.73018	c170173/1/1992|m.73018	. PREDICTED: uncharacterized protein LOC107424848 [Ziziphus jujuba]^7e-21^43%^XP_015890216.1	1	1	1		1	1	1	1	0	1	1	0	1	1	0	1	1	6.7	6.7	6.7	20.395	178	178	0.012346	0.12629		By matching	By MS/MS	0	6.7	6.7	58280000	0	182930	58097000	0	0	158320000	0	0	1	1
Unspecific	c202940/2/1519|m.78658	c202940/2/1519|m.78658	c202940/2/1519|m.78658	ACTG_EMENI^ACTG_EMENI^Q:1-203,H:82-284^99.015%ID^E:3.82e-142^RecName: Full=Actin, gamma;^Eukaryota; Fungi; Dikarya; Ascomycota; Pezizomycotina; Eurotiomycetes; Eurotiomycetidae; Eurotiales; Aspergillaceae; Aspergillus	1	1	1		1	1	1	1	1	0	0	1	0	0	1	0	0	5.3	5.3	5.3	34.296	303	303	0	35.591	By MS/MS			5.3	0	0	21102000	21102000	0	0	45415000	0	0	16	0	0	16
Unspecific	c209397/1/2102|m.83765	c209397/1/2102|m.83765	c209397/1/2102|m.83765	BAM9_ARATH^BAM9_ARATH^Q:1-508,H:1-536^52.302%ID^E:0^RecName: Full=Inactive beta-amylase 9;^Eukaryota; Viridiplantae; Streptophyta; Embryophyta; Tracheophyta; Spermatophyta; Magnoliophyta; eudicotyledons; Gunneridae; Pentapetalae; rosids; malvids; Brassicales; Brassicaceae; Camelineae; Arabidopsis	1	1	1		1	1	1	1	0	0	1	0	0	1	0	0	1	3.3	3.3	3.3	56.653	508	508	0.011236	0.02679			By MS/MS	0	0	3.3	7984700	0	0	7984700	0	0	12053000	0	0	1	1
Unspecific	c213090/1/1713|m.86637	c213090/1/1713|m.86637	c213090/1/1713|m.86637	.	1	1	1		1	1	1	1	0	1	0	0	1	0	0	1	0	14.9	14.9	14.9	11.969	114	114	0	0.40947		By MS/MS		0	14.9	0	0	0	0	0	0	0	0	0	1	0	1
Unspecific	c247076/1/1546|m.92261	c247076/1/1546|m.92261	c247076/1/1546|m.92261	TBB_TETTH^TBB_TETTH^Q:17-459,H:1-443^96.388%ID^E:0^RecName: Full=Tubulin beta chain;^Eukaryota; Alveolata; Ciliophora; Intramacronucleata; Oligohymenophorea; Hymenostomatida; Tetrahymenina; Tetrahymenidae; Tetrahymena	1	1	1		1	1	1	1	1	0	0	1	0	0	1	0	0	2.6	2.6	2.6	51.528	460	460	0.011765	0.087519	By MS/MS			2.6	0	0	0	0	0	0	0	0	0	1	0	0	1
Unspecific	c252106/1/2617|m.95935	c252106/1/2617|m.95935	c252106/1/2617|m.95935	.	1	1	1		1	1	1	1	0	1	0	0	1	0	0	1	0	3.3	3.3	3.3	41.528	366	366	0	0.54294		By MS/MS		0	3.3	0	0	0	0	0	0	0	0	0	1	0	1
Unspecific	c252448/1/1640|m.96197	c252448/1/1640|m.96197	c252448/1/1640|m.96197	.	1	1	1		1	1	1	1	0	0	1	0	0	1	0	0	1	9.9	9.9	9.9	18.972	162	162	0	0.70621			By MS/MS	0	0	9.9	44422000	0	0	44422000	0	0	67055000	0	0	1	1
Unspecific	c254910/1/1471|m.98078	c254910/1/1471|m.98078	c254910/1/1471|m.98078	GTOMC_ORYSJ^GTOMC_ORYSJ^Q:135-238,H:74-178^59.048%ID^E:1.87e-32^RecName: Full=Probable tocopherol O-methyltransferase, chloroplastic;^Eukaryota; Viridiplantae; Streptophyta; Embryophyta; Tracheophyta; Spermatophyta; Magnoliophyta; Liliopsida; Poales; Poaceae; BEP clade; Ehrhartoideae; Oryzeae; Oryza	1	1	1		1	1	1	1	0	1	1	0	1	1	0	1	1	4.7	4.7	4.7	32.544	298	298	0.011905	0.088197		By MS/MS	By MS/MS	0	4.7	4.7	21809000	0	4425300	17384000	0	0	16069000	0	1	1	2
Unspecific	c258849/1/2639|m.101005	c258849/1/2639|m.101005	c258849/1/2639|m.101005	AIR3_ARATH^AIR3_ARATH^Q:19-147,H:217-354^65.217%ID^E:5.96e-52^RecName: Full=Subtilisin-like protease SBT5.3;^Eukaryota; Viridiplantae; Streptophyta; Embryophyta; Tracheophyta; Spermatophyta; Magnoliophyta; eudicotyledons; Gunneridae; Pentapetalae; rosids; malvids; Brassicales; Brassicaceae; Camelineae; Arabidopsis	1	1	1		1	1	1	1	0	0	1	0	0	1	0	0	1	10.5	10.5	10.5	15.66	152	152	0	2.2817			By MS/MS	0	0	10.5	4852400	0	0	4852400	0	0	11988000	0	0	3	3
Unspecific	c27754/1/1517|m.17562	c27754/1/1517|m.17562	c27754/1/1517|m.17562	LHY_ARATH^LHY_ARATH^Q:712-1185,H:517-645^44.025%ID^E:2.04e-25^RecName: Full=Protein LHY;^Eukaryota; Viridiplantae; Streptophyta; Embryophyta; Tracheophyta; Spermatophyta; Magnoliophyta; eudicotyledons; Gunneridae; Pentapetalae; rosids; malvids; Brassicales; Brassicaceae; Camelineae; Arabidopsis	1	1	1		1	1	1	1	0	1	0	0	1	0	0	1	0	9.1	9.1	9.1	13.965	132	132	0	0.32663		By MS/MS		0	9.1	0	4603300	0	4603300	0	0	21197000	0	0	1	0	1
Unspecific	c28071/1/2097|m.17825	c28071/1/2097|m.17825	c28071/1/2097|m.17825	. Nucleotide-diphospho-sugar transferase [Tranquillimonas alkanivorans]^26%^E:7.0; protein shisa-9 [Danio rerio]^33%^E:0.014 Regulator of short-term neuronal synaptic plasticity in the dentate gyrus. Associates with AMPA receptors (ionotropic glutamate receptors) in synaptic spines and promotes AMPA receptor desensitization at excitatory synapses.;	1	1	1		1	1	1	1	0	1	1	0	1	1	0	1	1	14	14	14	12.802	114	114	0	0.63404		By matching	By MS/MS	0	14	14	19136000	0	599950	18536000	0	0	43885000	0	0	1	1
Unspecific	c29204/1/1771|m.18696	c29204/1/1771|m.18696	c29204/1/1771|m.18696	RMA3_ARATH^RMA3_ARATH^Q:98-210,H:11-131^38.525%ID^E:7.89e-17^RecName: Full=E3 ubiquitin-protein ligase RMA3;^Eukaryota; Viridiplantae; Streptophyta; Embryophyta; Tracheophyta; Spermatophyta; Magnoliophyta; eudicotyledons; Gunneridae; Pentapetalae; rosids; malvids; Brassicales; Brassicaceae; Camelineae; Arabidopsis	1	1	1		1	1	1	1	0	0	1	0	0	1	0	0	1	5.8	5.8	5.8	41.872	380	380	0	5.7382			By MS/MS	0	0	5.8	14752000	0	0	14752000	0	0	22364000	0	0	1	1
Unspecific	c302633/1/1350|m.27757	c302633/1/1350|m.27757	c302633/1/1350|m.27757	ENPL_HORVU^ENPL_HORVU^Q:1-228,H:68-295^89.912%ID^E:1.17e-141^RecName: Full=Endoplasmin homolog;^Eukaryota; Viridiplantae; Streptophyta; Embryophyta; Tracheophyta; Spermatophyta; Magnoliophyta; Liliopsida; Poales; Poaceae; BEP clade; Pooideae; Triticeae; Hordeum	1	1	1		1	1	1	1	1	0	0	1	0	0	1	0	0	4.3	4.3	4.3	31.562	276	276	0	0.30323	By MS/MS			4.3	0	0	0	0	0	0	0	0	0	1	0	0	1
Unspecific	c307170/1/2099|m.29950	c307170/1/2099|m.29950	c307170/1/2099|m.29950	OTUD5_MOUSE^OTUD5_MOUSE^Q:1-119,H:288-406^42.857%ID^E:1.99e-26^RecName: Full=OTU domain-containing protein 5;^Eukaryota; Metazoa; Chordata; Craniata; Vertebrata; Euteleostomi; Mammalia; Eutheria; Euarchontoglires; Glires; Rodentia; Sciurognathi; Muroidea; Muridae; Murinae; Mus; Mus	1	1	1		1	1	1	1	0	0	1	0	0	1	0	0	1	15.3	15.3	15.3	15.534	137	137	0	0.35498			By MS/MS	0	0	15.3	96948000	0	0	96948000	0	0	94096000	0	0	1	1
Unspecific	c337983/7/1358|m.74953	c337983/7/1358|m.74953	c337983/7/1358|m.74953	UCRI_MAIZE^UCRI_MAIZE^Q:1-238,H:1-234^66.939%ID^E:1.56e-107^RecName: Full=Cytochrome b-c1 complex subunit Rieske, mitochondrial;^Eukaryota; Viridiplantae; Streptophyta; Embryophyta; Tracheophyta; Spermatophyta; Magnoliophyta; Liliopsida; Poales; Poaceae; PACMAD clade; Panicoideae; Andropogoneae; Zea	1	1	1		1	1	1	1	0	0	1	0	0	1	0	0	1	5.5	5.5	5.5	29.914	273	273	0	7.3037			By MS/MS	0	0	5.5	29032000	0	0	29032000	0	0	44014000	0	0	1	1
Unspecific	c339194/1/1518|m.90509	c339194/1/1518|m.90509	c339194/1/1518|m.90509	IAA27_ARATH^IAA27_ARATH^Q:941-1216,H:198-292^45.361%ID^E:1.01e-17^RecName: Full=Auxin-responsive protein IAA27;^Eukaryota; Viridiplantae; Streptophyta; Embryophyta; Tracheophyta; Spermatophyta; Magnoliophyta; eudicotyledons; Gunneridae; Pentapetalae; rosids; malvids; Brassicales; Brassicaceae; Camelineae; Arabidopsis`IAA27_ARATH^IAA27_ARATH^Q:370-852,H:32-157^29.193%ID^E:1.01e-17^RecName: Full=Au…	1	1	1		1	1	1	1	0	0	1	0	0	1	0	0	1	17.1	17.1	17.1	12.438	111	111	0	2.1912			By MS/MS	0	0	17.1	3948100	0	0	3948100	0	0	5985400	0	0	1	1
Unspecific	c35066/1/1709|m.23553	c35066/1/1709|m.23553	c35066/1/1709|m.23553	MT21A_HUMAN^MT21A_HUMAN^Q:69-178,H:27-127^43.636%ID^E:1.32e-17^RecName: Full=Protein N-lysine methyltransferase METTL21A;^Eukaryota; Metazoa; Chordata; Craniata; Vertebrata; Euteleostomi; Mammalia; Eutheria; Euarchontoglires; Primates; Haplorrhini; Catarrhini; Hominidae; Homo	1	1	1		1	1	1	1	1	0	0	1	0	0	1	0	0	4.7	4.7	4.7	35.574	319	319	0	2.0249	By MS/MS			4.7	0	0	7236200	7236200	0	0	20859000	0	0	1	0	0	1
Unspecific	c37954/1/1505|m.26350	c37954/1/1505|m.26350	c37954/1/1505|m.26350	. PREDICTED: uncharacterized protein LOC109224958 [Nicotiana attenuata]^7e-47^59%^XP_019245080.1	1	1	1		1	1	1	1	1	0	0	1	0	0	1	0	0	9.4	9.4	9.4	19.667	181	181	0	12.328	By MS/MS			9.4	0	0	29040000	29040000	0	0	78979000	0	0	5	0	0	5
Unspecific	c4770/1/1487|m.4741	c4770/1/1487|m.4741	c4770/1/1487|m.4741	WRK22_ARATH^WRK22_ARATH^Q:640-885,H:107-188^82.927%ID^E:2.43e-39^RecName: Full=WRKY transcription factor 22;^Eukaryota; Viridiplantae; Streptophyta; Embryophyta; Tracheophyta; Spermatophyta; Magnoliophyta; eudicotyledons; Gunneridae; Pentapetalae; rosids; malvids; Brassicales; Brassicaceae; Camelineae; Arabidopsis`WRK22_ARATH^WRK22_ARATH^Q:944-1141,H:221-289^35.211%ID^E:2.43e-39^RecName: Full=WRK…	1	1	1		1	1	1	1	1	0	0	1	0	0	1	0	0	12.7	12.7	12.7	17.588	165	165	0	1.559	By MS/MS			12.7	0	0	19205000	19205000	0	0	81755000	0	0	1	0	0	1
Unspecific	c67995/1/1394|m.36412	c67995/1/1394|m.36412	c67995/1/1394|m.36412	. PREDICTED: uncharacterized protein LOC107411462 isoform X1 [Ziziphus jujuba]^8e-127^61%^XP_015874535.1	1	1	1		1	1	1	1	0	0	1	0	0	1	0	0	1	5.2	5.2	5.2	39.908	347	347	0	0.59932			By MS/MS	0	0	5.2	47693000	0	0	47693000	0	0	17113000	0	0	1	1
Unspecific	c69338/1/1992|m.37458	c69338/1/1992|m.37458	c69338/1/1992|m.37458	WRK39_ARATH^WRK39_ARATH^Q:1-81,H:1-77^46.914%ID^E:6.07e-11^RecName: Full=Probable WRKY transcription factor 39;^Eukaryota; Viridiplantae; Streptophyta; Embryophyta; Tracheophyta; Spermatophyta; Magnoliophyta; eudicotyledons; Gunneridae; Pentapetalae; rosids; malvids; Brassicales; Brassicaceae; Camelineae; Arabidopsis	1	1	1		1	1	1	1	1	0	0	1	0	0	1	0	0	16.2	16.2	16.2	11.407	99	99	0	3.7207	By MS/MS			16.2	0	0	22810000	22810000	0	0	62360000	0	0	1	0	0	1
Unspecific	NrPrx3	NrPrx3	NrPrx3	#N/A	1	1	1		1	1	1	1	0	0	1	0	0	1	0	0	1	4	4	4	35.92	326	326	0	0.73456			By MS/MS	0	0	4	17672000	0	0	17672000	0	0	43649000	0	0	1	1
Unspecific	BAD07474.1	BAD07474.1	BAD07474.1	#N/A	42	3	0		1	42	3	0	1	14	38	0	2	3	0	0	0	37.5	3	0	46.356	437	437	0	1.2553	By matching	By MS/MS	By MS/MS	2.5	21.1	36.2	79469000	0	65924000	13545000	0	101780000	45393000	0	2	3	5
Unspecific	c162227/1/1496|m.66948	c162227/1/1496|m.66948	c162227/1/1496|m.66948	. Neprosin	31	31	0		1	31	31	0	1	24	24	1	24	24	0	0	0	29.7	29.7	0	42.822	387	387	0	323.31	By matching	By MS/MS	By MS/MS	3.4	27.4	18.9	1169900000	715960	490940000	678240000	0	1302000000	2039500000	0	72	71	143
Unspecific	c171049/1/1434|m.73671	c171049/1/1434|m.73671	c171049/1/1434|m.73671	LTPG1_ARATH^LTPG1_ARATH^Q:56-150,H:34-132^33.333%ID^E:9.23e-12^RecName: Full=Non-specific lipid transfer protein GPI-anchored 1;^Eukaryota; Viridiplantae; Streptophyta; Embryophyta; Tracheophyta; Spermatophyta; Magnoliophyta; eudicotyledons; Gunneridae; Pentapetalae; rosids; malvids; Brassicales; Brassicaceae; Camelineae; Arabidopsis	11	11	11		1	11	11	11	6	4	10	6	4	10	6	4	10	30.4	30.4	30.4	25.128	224	224	0	176.73	By MS/MS	By MS/MS	By MS/MS	26.3	13.8	23.7	1499100000	19824000	14137000	1465100000	230450000	143590000	1578900000	3	3	41	47
Unspecific	c299607/1/1589|m.90504	c299607/1/1589|m.90504	c299607/1/1589|m.90504	NEP2_NEPGR^NEP2_NEPGR^Q:2-110,H:329-435^49.541%ID^E:1.64e-23^RecName: Full=Aspartic proteinase nepenthesin-2;^Eukaryota; Viridiplantae; Streptophyta; Embryophyta; Tracheophyta; Spermatophyta; Magnoliophyta; eudicotyledons; Gunneridae; Pentapetalae; Caryophyllales; Nepenthaceae; Nepenthes	8	1	1		1	8	1	1	0	3	7	0	1	0	0	1	0	38.6	10.5	10.5	12.374	114	114	0.011364	0.067296		By MS/MS	By matching	0	34.2	28.1	0	0	0	0	0	0	0	0	1	0	1
Unspecific	c62517/2/1578|m.32343	c62517/2/1578|m.32343	c62517/2/1578|m.32343	NEP1_NEPGR^NEP1_NEPGR^Q:1-437,H:1-437^97.025%ID^E:0^RecName: Full=Aspartic proteinase nepenthesin-1;^Eukaryota; Viridiplantae; Streptophyta; Embryophyta; Tracheophyta; Spermatophyta; Magnoliophyta; eudicotyledons; Gunneridae; Pentapetalae; Caryophyllales; Nepenthaceae; Nepenthes	47	47	4		1	47	47	4	3	14	43	3	14	43	0	0	4	39.6	39.6	4.3	46.466	437	437	0	323.31	By matching	By MS/MS	By MS/MS	5.9	23.8	38.2	1192400000	8777800	120620000	1063000000	50781000	130640000	3088000000	0	43	162	205
Unspecific	NrChit3	NrChit3	NrChit3	#N/A	2	2	2		1	2	2	2	1	1	0	1	1	0	1	1	0	7.2	7.2	7.2	31.086	292	292	0	4.3284	By MS/MS	By MS/MS		3.1	4.1	0	13766000	5846700	7918900	0	0	15107000	0	0	3	0	3
Unspecific	NrDom1	NrDom1	NrDom1	#N/A	17	17	17		1	17	17	17	8	5	11	8	5	11	8	5	11	28.4	28.4	28.4	27.784	271	271	0	323.31	By MS/MS	By MS/MS	By MS/MS	15.9	16.2	22.1	535870000	72446000	70472000	392960000	228690000	116540000	658250000	13	17	39	69
Unspecific	NrNep1	NrNep1	NrNep1	#N/A	46	3	0		1	46	3	0	4	14	42	1	0	3	0	0	0	39.1	3.9	0	46.452	437	437	0	133.11	By matching	By matching	By MS/MS	8.5	23.8	37.8	90548000	659060	0	89889000	0	0	257290000	0	0	11	11
Unspecific	NrNep4	NrNep4	NrNep4	#N/A	40	40	33		1	40	40	33	4	27	28	4	27	28	4	25	21	44	44	36.9	48.281	445	445	0	323.31	By matching	By MS/MS	By MS/MS	9.4	37.1	37.1	1611200000	5876700	1310600000	294690000	13530000	2578900000	1344300000	0	141	68	209
Unspecific	NrPAP1	NrPAP1	NrPAP1	#N/A	7	7	7		1	7	7	7	5	4	5	5	4	5	5	4	5	12	12	12	70.628	640	640	0	45.541	By MS/MS	By MS/MS	By MS/MS	8.3	7.7	9.2	74911000	41204000	18191000	15515000	41523000	117430000	32183000	12	4	5	21
Unspecific	NrRNaseS	NrRNaseS	NrRNaseS	#N/A	3	3	3		1	3	3	3	0	2	2	0	2	2	0	2	2	11.3	11.3	11.3	25.556	231	231	0	16.366		By MS/MS	By MS/MS	0	6.1	11.3	20583000	0	3089000	17494000	0	0	50274000	0	2	6	8
Unspecific	AGA82514.1	AGA82514.1	AGA82514.1	#N/A	1	1	1		1	1	1	1	0	1	0	0	1	0	0	1	0	1	1	1	102.66	924	924	0.041667	-0.0023912		By MS/MS		0	1	0	31692	0	31692	0	0	133450	0	0	0	0	0
Unspecific	c10281/1/1554|m.9883	c10281/1/1554|m.9883	c10281/1/1554|m.9883	.	1	1	1		1	1	1	1	1	0	0	1	0	0	1	0	0	7.6	7.6	7.6	13.984	118	118	0.040816	-0.0023912	By MS/MS			7.6	0	0	2493700	2493700	0	0	6246700	0	0	0	0	0	0
Unspecific	c10573/1/1927|m.10128	c10573/1/1927|m.10128	c10573/1/1927|m.10128	LVSC_DICDI^LVSC_DICDI^Q:1-339,H:2093-2390^27.557%ID^E:1.51e-29^RecName: Full=BEACH domain-containing protein lvsC;^Eukaryota; Amoebozoa; Mycetozoa; Dictyosteliida; Dictyostelium	1	1	1		1	1	1	1	1	1	1	1	1	1	1	1	1	1.9	1.9	1.9	52.893	486	486	0.039604	-0.0023912	By MS/MS	By matching	By matching	1.9	1.9	1.9	8107500	2213500	1000700	4893400	0	0	11585000	0	0	0	0
Unspecific	c10837/1/1453|m.10354	c10837/1/1453|m.10354	c10837/1/1453|m.10354	.	1	1	1		1	1	1	1	1	0	0	1	0	0	1	0	0	8.7	8.7	8.7	11.74	103	103	0.037736	-0.0023912	By MS/MS			8.7	0	0	2313300	2313300	0	0	5591100	0	0	0	0	0	0
Unspecific	c11066/1/1483|m.10528	c11066/1/1483|m.10528	c11066/1/1483|m.10528	VPS54_ARATH^VPS54_ARATH^Q:1-345,H:637-1028^57.468%ID^E:4.83e-145^RecName: Full=Vacuolar protein sorting-associated protein 54, chloroplastic;^Eukaryota; Viridiplantae; Streptophyta; Embryophyta; Tracheophyta; Spermatophyta; Magnoliophyta; eudicotyledons; Gunneridae; Pentapetalae; rosids; malvids; Brassicales; Brassicaceae; Camelineae; Arabidopsis	1	1	1		1	1	1	1	1	0	1	1	0	1	1	0	1	2.6	2.6	2.6	39.694	348	348	0.036364	-0.0023912	By MS/MS		By matching	2.6	0	2.6	4721000	981130	0	3739900	0	0	9296000	0	0	0	0
Unspecific	c110984/3/1312|m.47117	c110984/3/1312|m.47117	c110984/3/1312|m.47117	NRP1_ARATH^NRP1_ARATH^Q:21-224,H:22-227^77.67%ID^E:1.29e-108^RecName: Full=NAP1-related protein 1;^Eukaryota; Viridiplantae; Streptophyta; Embryophyta; Tracheophyta; Spermatophyta; Magnoliophyta; eudicotyledons; Gunneridae; Pentapetalae; rosids; malvids; Brassicales; Brassicaceae; Camelineae; Arabidopsis	1	1	1		1	1	1	1	1	0	1	1	0	1	1	0	1	3.4	3.4	3.4	30.756	265	265	0.035398	-0.0023912	By MS/MS		By matching	3.4	0	3.4	11188000	10442000	0	746440	11575000	0	0	0	0	0	0
Unspecific	c112199/1/1786|m.48084	c112199/1/1786|m.48084	c112199/1/1786|m.48084	Y3264_ARATH^Y3264_ARATH^Q:2-205,H:22-210^45.098%ID^E:4.8e-55^RecName: Full=Putative UPF0481 protein At3g02645;^Eukaryota; Viridiplantae; Streptophyta; Embryophyta; Tracheophyta; Spermatophyta; Magnoliophyta; eudicotyledons; Gunneridae; Pentapetalae; rosids; malvids; Brassicales; Brassicaceae; Camelineae; Arabidopsis	1	1	1		1	1	1	1	0	1	0	0	1	0	0	1	0	3.9	3.9	3.9	26.537	231	231	0.034188	-0.0023912		By MS/MS		0	3.9	0	108140	0	108140	0	0	455360	0	0	0	0	0
Unspecific	c112211/1/2453|m.48092	c112211/1/2453|m.48092	c112211/1/2453|m.48092	EXEC1_ARATH^EXEC1_ARATH^Q:88-649,H:115-682^38.721%ID^E:7.64e-115^RecName: Full=Protein EXECUTER 1, chloroplastic;^Eukaryota; Viridiplantae; Streptophyta; Embryophyta; Tracheophyta; Spermatophyta; Magnoliophyta; eudicotyledons; Gunneridae; Pentapetalae; rosids; malvids; Brassicales; Brassicaceae; Camelineae; Arabidopsis	1	1	1		1	1	1	1	1	0	0	1	0	0	1	0	0	1.4	1.4	1.4	72.172	651	651	0.033898	-0.0023912	By MS/MS			1.4	0	0	438020	438020	0	0	1864600	0	0	0	0	0	0
Unspecific	c112331/1/2511|m.48169	c112331/1/2511|m.48169	c112331/1/2511|m.48169	WBC30_ARATH^WBC30_ARATH^Q:41-415,H:394-766^65.867%ID^E:1.83e-173^RecName: Full=Putative white-brown complex homolog protein 30;^Eukaryota; Viridiplantae; Streptophyta; Embryophyta; Tracheophyta; Spermatophyta; Magnoliophyta; eudicotyledons; Gunneridae; Pentapetalae; rosids; malvids; Brassicales; Brassicaceae; Camelineae; Arabidopsis	1	1	1		1	1	1	1	0	1	1	0	1	1	0	1	1	2.1	2.1	2.1	47.962	428	428	0.033613	-0.0023912		By MS/MS	By matching	0	2.1	2.1	22190000	0	427820	21762000	0	0	30518000	0	0	0	0
Unspecific	c112497/1/1535|m.48270	c112497/1/1535|m.48270	c112497/1/1535|m.48270	NAT6_ARATH^NAT6_ARATH^Q:1-242,H:291-532^84.298%ID^E:5.95e-146^RecName: Full=Nucleobase-ascorbate transporter 6;^Eukaryota; Viridiplantae; Streptophyta; Embryophyta; Tracheophyta; Spermatophyta; Magnoliophyta; eudicotyledons; Gunneridae; Pentapetalae; rosids; malvids; Brassicales; Brassicaceae; Camelineae; Arabidopsis	1	1	1		1	1	1	1	1	0	0	1	0	0	1	0	0	3.7	3.7	3.7	26.648	242	242	0.033333	-0.0023912	By MS/MS			3.7	0	0	115130	115130	0	0	288410	0	0	0	0	0	0
Unspecific	c112851/1/2299|m.48511	c112851/1/2299|m.48511	c112851/1/2299|m.48511	CESA9_ORYSJ^CESA9_ORYSJ^Q:22-144,H:534-656^91.87%ID^E:2.29e-76^RecName: Full=Cellulose synthase A catalytic subunit 9 [UDP-forming];^Eukaryota; Viridiplantae; Streptophyta; Embryophyta; Tracheophyta; Spermatophyta; Magnoliophyta; Liliopsida; Poales; Poaceae; BEP clade; Ehrhartoideae; Oryzeae; Oryza	1	1	1		1	1	1	1	1	1	0	1	1	0	1	1	0	5.1	5.1	5.1	20.508	177	177	0.033058	-0.0023912	By matching	By MS/MS		5.1	5.1	0	2608000	1144500	1463500	0	0	6162300	0	0	0	0	0
Unspecific	c112938/1/1280|m.48567	c112938/1/1280|m.48567	c112938/1/1280|m.48567	DIOX2_ARATH^DIOX2_ARATH^Q:1-167,H:1-167^69.461%ID^E:5.83e-80^RecName: Full=Probable 2-oxoglutarate-dependent dioxygenase At3g49630;^Eukaryota; Viridiplantae; Streptophyta; Embryophyta; Tracheophyta; Spermatophyta; Magnoliophyta; eudicotyledons; Gunneridae; Pentapetalae; rosids; malvids; Brassicales; Brassicaceae; Camelineae; Arabidopsis	1	1	1		1	1	1	1	1	1	0	1	1	0	1	1	0	4.9	4.9	4.9	20.711	184	184	0.03252	-0.0023912	By MS/MS	By matching		4.9	4.9	0	11036000	9604100	1432200	0	23556000	0	0	0	0	0	0
Unspecific	c113160/1/998|m.48743	c113160/1/998|m.48743	c113160/1/998|m.48743	YAB5_ARATH^YAB5_ARATH^Q:1-122,H:51-164^70.492%ID^E:1.92e-48^RecName: Full=Axial regulator YABBY 5;^Eukaryota; Viridiplantae; Streptophyta; Embryophyta; Tracheophyta; Spermatophyta; Magnoliophyta; eudicotyledons; Gunneridae; Pentapetalae; rosids; malvids; Brassicales; Brassicaceae; Camelineae; Arabidopsis	1	1	1		1	1	1	1	1	0	0	1	0	0	1	0	0	7.4	7.4	7.4	14.162	122	122	0.032258	-0.0023912	By MS/MS			7.4	0	0	2151800	2151800	0	0	5390400	0	0	0	0	0	0
Unspecific	c1136/4/1464|m.1085	c1136/4/1464|m.1085	c1136/4/1464|m.1085	SY131_ARATH^SY131_ARATH^Q:44-348,H:1-306^73.529%ID^E:2.14e-152^RecName: Full=Putative syntaxin-131;^Eukaryota; Viridiplantae; Streptophyta; Embryophyta; Tracheophyta; Spermatophyta; Magnoliophyta; eudicotyledons; Gunneridae; Pentapetalae; rosids; malvids; Brassicales; Brassicaceae; Camelineae; Arabidopsis	1	1	1		1	1	1	1	0	1	0	0	1	0	0	1	0	2.6	2.6	2.6	39.519	348	348	0.032	-0.0023912		By MS/MS		0	2.6	0	1697500	0	1697500	0	0	7147800	0	0	0	0	0
Unspecific	c113972/1/1927|m.49324	c113972/1/1927|m.49324	c113972/1/1927|m.49324	PTR5_ARATH^PTR5_ARATH^Q:61-153,H:123-215^70.968%ID^E:1.29e-39^RecName: Full=Protein NRT1/ PTR FAMILY 8.2;^Eukaryota; Viridiplantae; Streptophyta; Embryophyta; Tracheophyta; Spermatophyta; Magnoliophyta; eudicotyledons; Gunneridae; Pentapetalae; rosids; malvids; Brassicales; Brassicaceae; Camelineae; Arabidopsis	1	1	1		1	1	1	1	0	1	0	0	1	0	0	1	0	4.7	4.7	4.7	21.698	193	193	0.031746	-0.0023912		By MS/MS		0	4.7	0	383030	0	383030	0	0	1612800	0	0	0	0	0
Unspecific	c114115/1/2465|m.49423	c114115/1/2465|m.49423	c114115/1/2465|m.49423	HSP90_PODAS^HSP90_PODAS^Q:21-128,H:310-417^89.815%ID^E:2.75e-61^RecName: Full=Heat shock protein 90 homolog;^Eukaryota; Fungi; Dikarya; Ascomycota; Pezizomycotina; Sordariomycetes; Sordariomycetidae; Sordariales; Lasiosphaeriaceae; Podospora	1	1	1		1	1	1	1	0	1	0	0	1	0	0	1	0	4.7	4.7	4.7	21.889	190	190	0.03125	-0.0023912		By MS/MS		0	4.7	0	802370	0	802370	0	0	3378500	0	0	0	0	0
Unspecific	c114330/1/1245|m.49559	c114330/1/1245|m.49559	c114330/1/1245|m.49559	WRK57_ARATH^WRK57_ARATH^Q:1-307,H:1-285^44.479%ID^E:1.36e-66^RecName: Full=Probable WRKY transcription factor 57;^Eukaryota; Viridiplantae; Streptophyta; Embryophyta; Tracheophyta; Spermatophyta; Magnoliophyta; eudicotyledons; Gunneridae; Pentapetalae; rosids; malvids; Brassicales; Brassicaceae; Camelineae; Arabidopsis	1	1	1		1	1	1	1	1	1	0	1	1	0	1	1	0	2.9	2.9	2.9	33.444	309	309	0.030534	-0.0023912	By matching	By MS/MS		2.9	2.9	0	593340	229790	363560	0	553610	0	0	0	0	0	0
Unspecific	c114331/1/1835|m.49561	c114331/1/1835|m.49561	c114331/1/1835|m.49561	BEBT_TOBAC^BEBT_TOBAC^Q:1-224,H:234-443^43.231%ID^E:7.9e-42^RecName: Full=Benzyl alcohol O-benzoyltransferase;^Eukaryota; Viridiplantae; Streptophyta; Embryophyta; Tracheophyta; Spermatophyta; Magnoliophyta; eudicotyledons; Gunneridae; Pentapetalae; asterids; lamiids; Solanales; Solanaceae; Nicotianoideae; Nicotianeae; Nicotiana	1	1	1		1	1	1	1	1	0	0	1	0	0	1	0	0	4	4	4	24.997	227	227	0.030303	-0.0023912	By MS/MS			4	0	0	1216700	1216700	0	0	3047900	0	0	0	0	0	0
Unspecific	c114429/7/1787|m.49642	c114429/7/1787|m.49642	c114429/7/1787|m.49642	RU17_ARATH^RU17_ARATH^Q:34-342,H:1-304^73.786%ID^E:1.44e-155^RecName: Full=U1 small nuclear ribonucleoprotein 70 kDa;^Eukaryota; Viridiplantae; Streptophyta; Embryophyta; Tracheophyta; Spermatophyta; Magnoliophyta; eudicotyledons; Gunneridae; Pentapetalae; rosids; malvids; Brassicales; Brassicaceae; Camelineae; Arabidopsis	1	1	1		1	1	1	1	1	1	1	1	1	1	1	1	1	1.8	1.8	1.8	60.048	505	505	0.030075	-0.0023912	By matching	By MS/MS	By matching	1.8	1.8	1.8	2203700	1420700	415990	367070	0	0	869060	0	0	0	0
Unspecific	c114434/1/1471|m.49646	c114434/1/1471|m.49646	c114434/1/1471|m.49646	.	1	1	1		1	1	1	1	1	0	0	1	0	0	1	0	0	7	7	7	14.347	128	128	0.029851	-0.0023912	By MS/MS			7	0	0	4869800	4869800	0	0	20731000	0	0	0	0	0	0
Unspecific	c115367/1/1878|m.50331	c115367/1/1878|m.50331	c115367/1/1878|m.50331	TKI1_ARATH^TKI1_ARATH^Q:348-674,H:313-421^55.455%ID^E:2.7e-27^RecName: Full=TSL-kinase interacting protein 1;^Eukaryota; Viridiplantae; Streptophyta; Embryophyta; Tracheophyta; Spermatophyta; Magnoliophyta; eudicotyledons; Gunneridae; Pentapetalae; rosids; malvids; Brassicales; Brassicaceae; Camelineae; Arabidopsis	1	1	1		1	1	1	1	1	1	0	1	1	0	1	1	0	5.2	5.2	5.2	19.048	173	173	0.029197	-0.0023912	By MS/MS	By matching		5.2	5.2	0	15403000	7640200	7763100	0	12904000	0	0	0	0	0	0
Unspecific	c115634/1/2042|m.50517	c115634/1/2042|m.50517	c115634/1/2042|m.50517	CP511_ARATH^CP511_ARATH^Q:1-223,H:3-223^77.578%ID^E:5.58e-119^RecName: Full=Sterol 14-demethylase;^Eukaryota; Viridiplantae; Streptophyta; Embryophyta; Tracheophyta; Spermatophyta; Magnoliophyta; eudicotyledons; Gunneridae; Pentapetalae; rosids; malvids; Brassicales; Brassicaceae; Camelineae; Arabidopsis	1	1	1		1	1	1	1	1	0	0	1	0	0	1	0	0	3.7	3.7	3.7	27.622	244	244	0.028571	-0.0023912	By MS/MS			3.7	0	0	601350	601350	0	0	1506400	0	0	0	0	0	0
Unspecific	c115694/1/2309|m.50579	c115694/1/2309|m.50579	c115694/1/2309|m.50579	SYRC_XENTR^SYRC_XENTR^Q:1-111,H:119-227^49.123%ID^E:7.1e-29^RecName: Full=Arginine--tRNA ligase, cytoplasmic;^Eukaryota; Metazoa; Chordata; Craniata; Vertebrata; Euteleostomi; Amphibia; Batrachia; Anura; Pipoidea; Pipidae; Xenopodinae; Xenopus; Silurana	1	1	1		1	1	1	1	1	1	0	1	1	0	1	1	0	6.9	6.9	6.9	14.206	131	131	0.028369	-0.0023912	By matching	By MS/MS		6.9	6.9	0	2531100	716300	1814800	0	1717200	0	0	0	0	0	0
Unspecific	c116058/1/1326|m.50900	c116058/1/1326|m.50900	c116058/1/1326|m.50900	.	1	1	1		1	1	1	1	0	1	0	0	1	0	0	1	0	3.2	3.2	3.2	31.143	280	280	0.027972	-0.0023912		By MS/MS		0	3.2	0	666920	0	666920	0	0	2808200	0	0	0	0	0
Unspecific	c116172/1/1608|m.50999	c116172/1/1608|m.50999	c116172/1/1608|m.50999	.	1	1	1		1	1	1	1	1	0	0	1	0	0	1	0	0	5.2	5.2	5.2	18.335	173	173	0.027778	-0.0023912	By MS/MS			5.2	0	0	3952400	3952400	0	0	16825000	0	0	0	0	0	0
Unspecific	c116682/1/1341|m.51375	c116682/1/1341|m.51375	c116682/1/1341|m.51375	S35D2_PIG^S35D2_PIG^Q:31-318,H:8-317^28.173%ID^E:2.35e-23^RecName: Full=UDP-N-acetylglucosamine/UDP-glucose/GDP-mannose transporter;^Eukaryota; Metazoa; Chordata; Craniata; Vertebrata; Euteleostomi; Mammalia; Eutheria; Laurasiatheria; Cetartiodactyla; Suina; Suidae; Sus	1	1	1		1	1	1	1	1	0	0	1	0	0	1	0	0	2.8	2.8	2.8	35.837	324	324	0.027211	-0.0023912	By MS/MS			2.8	0	0	8284000	8284000	0	0	12167000	0	0	0	0	0	0
Unspecific	c116869/1/960|m.51488	c116869/1/960|m.51488	c116869/1/960|m.51488	RH42_ARATH^RH42_ARATH^Q:2-119,H:233-347^60.833%ID^E:8.51e-25^RecName: Full=DEAD-box ATP-dependent RNA helicase 42;^Eukaryota; Viridiplantae; Streptophyta; Embryophyta; Tracheophyta; Spermatophyta; Magnoliophyta; eudicotyledons; Gunneridae; Pentapetalae; rosids; malvids; Brassicales; Brassicaceae; Camelineae; Arabidopsis	1	1	1		1	1	1	1	1	1	1	1	1	1	1	1	1	7	7	7	15.119	129	129	0.026846	-0.0023912	By matching	By MS/MS	By matching	7	7	7	4252100	1519600	2153200	579270	0	0	1371400	0	0	0	0
Unspecific	c11693/1/1673|m.11097	c11693/1/1673|m.11097	c11693/1/1673|m.11097	PMTH_ARATH^PMTH_ARATH^Q:1-100,H:155-254^51.852%ID^E:1.15e-26^RecName: Full=Probable methyltransferase PMT17;^Eukaryota; Viridiplantae; Streptophyta; Embryophyta; Tracheophyta; Spermatophyta; Magnoliophyta; eudicotyledons; Gunneridae; Pentapetalae; rosids; malvids; Brassicales; Brassicaceae; Camelineae; Arabidopsis	1	1	1		1	1	1	1	1	1	1	1	1	1	1	1	1	8.3	8.3	8.3	11.941	108	108	0.026667	-0.0023912	By MS/MS	By matching	By matching	8.3	8.3	8.3	20934000	7631400	1651300	11652000	0	0	12345000	0	0	0	0
Unspecific	c117212/1/1990|m.51736	c117212/1/1990|m.51736	c117212/1/1990|m.51736	.	1	1	1		1	1	1	1	0	1	1	0	1	1	0	1	1	6.3	6.3	6.3	15.682	143	143	0.02649	-0.0023912		By MS/MS	By matching	0	6.3	6.3	6776100	0	103610	6672500	0	0	2394200	0	0	0	0
Unspecific	c117833/1/1859|m.52203	c117833/1/1859|m.52203	c117833/1/1859|m.52203	TCP12_ARATH^TCP12_ARATH^Q:1-74,H:130-194^58.974%ID^E:2.07e-16^RecName: Full=Transcription factor TCP12;^Eukaryota; Viridiplantae; Streptophyta; Embryophyta; Tracheophyta; Spermatophyta; Magnoliophyta; eudicotyledons; Gunneridae; Pentapetalae; rosids; malvids; Brassicales; Brassicaceae; Camelineae; Arabidopsis	1	1	1		1	1	1	1	1	1	0	1	1	0	1	1	0	2.9	2.9	2.9	34.638	311	311	0.026316	-0.0023912	By matching	By MS/MS		2.9	2.9	0	1452200	818790	633420	0	0	2667200	0	0	0	0	0
Unspecific	c11900/1/1965|m.11278	c11900/1/1965|m.11278	c11900/1/1965|m.11278	.	1	1	1		1	1	1	1	1	0	0	1	0	0	1	0	0	4.8	4.8	4.8	21.058	186	186	0.025641	-0.0023912	By MS/MS			4.8	0	0	539190	539190	0	0	1350700	0	0	0	0	0	0
Unspecific	c119010/1/2141|m.53104	c119010/1/2141|m.53104	c119010/1/2141|m.53104	.	1	1	1		1	1	1	1	0	1	0	0	1	0	0	1	0	7.8	7.8	7.8	12.795	115	115	0.025478	-0.0023912		By MS/MS		0	7.8	0	1335200	0	1335200	0	0	5622100	0	0	0	0	0
Unspecific	c119107/1/1960|m.53181	c119107/1/1960|m.53181	c119107/1/1960|m.53181	MAS5_SCHPO^MAS5_SCHPO^Q:1-323,H:1-312^56.347%ID^E:4.06e-113^RecName: Full=Mitochondrial protein import protein mas5;^Eukaryota; Fungi; Dikarya; Ascomycota; Taphrinomycotina; Schizosaccharomycetes; Schizosaccharomycetales; Schizosaccharomycetaceae; Schizosaccharomyces	1	1	1		1	1	1	1	1	0	0	1	0	0	1	0	0	2.2	2.2	2.2	44.871	404	404	0.025316	-0.0023912	By MS/MS			2.2	0	0	899790	899790	0	0	1173300	0	0	0	0	0	0
Unspecific	c120203/1/2423|m.54000	c120203/1/2423|m.54000	c120203/1/2423|m.54000	YHM3_SCHPO^YHM3_SCHPO^Q:176-387,H:5-211^26.047%ID^E:9.8e-12^RecName: Full=Uncharacterized FCP1 homology domain-containing protein C1271.03c;^Eukaryota; Fungi; Dikarya; Ascomycota; Taphrinomycotina; Schizosaccharomycetes; Schizosaccharomycetales; Schizosaccharomycetaceae; Schizosaccharomyces	1	1	1		1	1	1	1	1	0	1	1	0	1	1	0	1	2.1	2.1	2.1	47.66	424	424	0.025	-0.0023912	By MS/MS		By matching	2.1	0	2.1	1084900	534810	0	550130	0	0	2634600	0	0	0	0
Unspecific	c123052/5/1395|m.56111	c123052/5/1395|m.56111	c123052/5/1395|m.56111	EXL3_ARATH^EXL3_ARATH^Q:35-361,H:35-363^61.515%ID^E:9.37e-142^RecName: Full=GDSL esterase/lipase EXL3;^Eukaryota; Viridiplantae; Streptophyta; Embryophyta; Tracheophyta; Spermatophyta; Magnoliophyta; eudicotyledons; Gunneridae; Pentapetalae; rosids; malvids; Brassicales; Brassicaceae; Camelineae; Arabidopsis	1	1	1		1	1	1	1	1	1	0	1	1	0	1	1	0	2.5	2.5	2.5	39.787	362	362	0.02439	-0.0023912	By MS/MS	By matching		2.5	2.5	0	5691700	3420700	2271000	0	6520000	0	0	0	0	0	0
Unspecific	c124576/1/1375|m.57217	c124576/1/1375|m.57217	c124576/1/1375|m.57217	ALFL5_ARATH^ALFL5_ARATH^Q:338-1093,H:1-260^69.732%ID^E:3.82e-106^RecName: Full=PHD finger protein ALFIN-LIKE 5;^Eukaryota; Viridiplantae; Streptophyta; Embryophyta; Tracheophyta; Spermatophyta; Magnoliophyta; eudicotyledons; Gunneridae; Pentapetalae; rosids; malvids; Brassicales; Brassicaceae; Camelineae; Arabidopsis	1	1	1		1	1	1	1	0	1	0	0	1	0	0	1	0	6.5	6.5	6.5	15.232	138	138	0.021739	-0.0023912		By MS/MS		0	6.5	0	28255000	0	28255000	0	0	37531000	0	0	0	0	0
Unspecific	c124927/1/1416|m.57488	c124927/1/1416|m.57488	c124927/1/1416|m.57488	PPR57_ARATH^PPR57_ARATH^Q:1-426,H:363-790^64.953%ID^E:0^RecName: Full=Pentatricopeptide repeat-containing protein At1g25360;^Eukaryota; Viridiplantae; Streptophyta; Embryophyta; Tracheophyta; Spermatophyta; Magnoliophyta; eudicotyledons; Gunneridae; Pentapetalae; rosids; malvids; Brassicales; Brassicaceae; Camelineae; Arabidopsis`PPR57_ARATH^PPR57_ARATH^Q:21-251,H:252-511^23.308%ID^E:3.09e-18^Rec…	1	1	1		1	1	1	1	0	1	1	0	1	1	0	1	1	2.1	2.1	2.1	47.633	426	426	0.02381	-0.0023912		By MS/MS	By matching	0	2.1	2.1	3359800	0	1401600	1958300	0	0	4636200	0	0	0	0
Unspecific	c125872/1/1683|m.58169	c125872/1/1683|m.58169	c125872/1/1683|m.58169	TCPZA_ARATH^TCPZA_ARATH^Q:1-118,H:193-339^72.789%ID^E:3.57e-66^RecName: Full=T-complex protein 1 subunit zeta 1 {ECO:0000303|PubMed:11599560};^Eukaryota; Viridiplantae; Streptophyta; Embryophyta; Tracheophyta; Spermatophyta; Magnoliophyta; eudicotyledons; Gunneridae; Pentapetalae; rosids; malvids; Brassicales; Brassicaceae; Camelineae; Arabidopsis	1	1	1		1	1	1	1	1	1	0	1	1	0	1	1	0	7.6	7.6	7.6	13.372	118	118	0.023529	-0.0023912	By matching	By MS/MS		7.6	7.6	0	242990	62474	180520	0	0	760110	0	0	0	0	0
Unspecific	c126429/1/2278|m.58633	c126429/1/2278|m.58633	c126429/1/2278|m.58633	FKGP_ARATH^FKGP_ARATH^Q:1-153,H:309-460^71.242%ID^E:7.25e-70^RecName: Full=Bifunctional fucokinase/fucose pyrophosphorylase;^Eukaryota; Viridiplantae; Streptophyta; Embryophyta; Tracheophyta; Spermatophyta; Magnoliophyta; eudicotyledons; Gunneridae; Pentapetalae; rosids; malvids; Brassicales; Brassicaceae; Camelineae; Arabidopsis	1	1	1		1	1	1	1	1	0	0	1	0	0	1	0	0	5.8	5.8	5.8	17.025	154	154	0.022857	-0.0023912	By MS/MS			5.8	0	0	498810	498810	0	0	1249500	0	0	0	0	0	0
Unspecific	c126967/2/1427|m.59037	c126967/2/1427|m.59037	c126967/2/1427|m.59037	Y1601_CHLCH^Y1601_CHLCH^Q:176-348,H:25-183^32.948%ID^E:4.61e-25^RecName: Full=UPF0301 protein Cag_1601 {ECO:0000255|HAMAP-Rule:MF_00758};^Bacteria; Chlorobi; Chlorobia; Chlorobiales; Chlorobiaceae; Chlorobium/Pelodictyon group; Chlorobium	1	1	1		1	1	1	1	1	1	1	1	1	1	1	1	1	2.6	2.6	2.6	38.738	351	351	0.022599	-0.0023912	By MS/MS	By matching	By matching	2.6	2.6	2.6	14959000	12103000	1056800	1799800	0	0	5015500	0	0	0	0
Unspecific	c127403/1/1477|m.59346	c127403/1/1477|m.59346	c127403/1/1477|m.59346	.	1	1	1		1	1	1	1	1	1	1	1	1	1	1	1	1	3.8	3.8	3.8	26.336	235	235	0.022346	-0.0023912	By MS/MS	By matching	By matching	3.8	3.8	3.8	14562000	11708000	2099400	753780	16510000	0	0	0	0	0	0
Unspecific	c128505/1/1406|m.60145	c128505/1/1406|m.60145	c128505/1/1406|m.60145	STAD_SIMCH^STAD_SIMCH^Q:63-142,H:31-111^41.573%ID^E:3.39e-07^RecName: Full=Acyl-[acyl-carrier-protein] desaturase, chloroplastic;^Eukaryota; Viridiplantae; Streptophyta; Embryophyta; Tracheophyta; Spermatophyta; Magnoliophyta; eudicotyledons; Gunneridae; Pentapetalae; Caryophyllales; Simmondsiaceae; Simmondsia	1	1	1		1	1	1	1	1	1	1	1	1	1	1	1	1	5.8	5.8	5.8	17.43	156	156	0.022099	-0.0023912	By matching	By MS/MS	By matching	5.8	5.8	5.8	10596000	1773700	5687800	3134800	0	0	8265200	0	0	0	0
Unspecific	c128949/1/1541|m.60487	c128949/1/1541|m.60487	c128949/1/1541|m.60487	.	1	1	1		1	1	1	1	1	0	0	1	0	0	1	0	0	2.1	2.1	2.1	48.4	430	430	0.021978	-0.0023912	By MS/MS			2.1	0	0	422180	422180	0	0	1057600	0	0	0	0	0	0
Unspecific	c13573/4/1382|m.12694	c13573/4/1382|m.12694	c13573/4/1382|m.12694	TRA1_YEAST^TRA1_YEAST^Q:7-148,H:3351-3491^36.62%ID^E:1.77e-24^RecName: Full=Transcription-associated protein 1;^Eukaryota; Fungi; Dikarya; Ascomycota; Saccharomycotina; Saccharomycetes; Saccharomycetales; Saccharomycetaceae; Saccharomyces	1	1	1		1	1	1	1	1	1	1	1	1	1	1	1	1	6	6	6	17.471	149	149	0.021739	-0.0023912	By matching	By MS/MS	By matching	6	6	6	48734000	27104000	13340000	8290000	0	0	24700000	0	0	0	0
Unspecific	c13636/3/1856|m.12737	c13636/3/1856|m.12737	c13636/3/1856|m.12737	HSPR1_ARATH^HSPR1_ARATH^Q:1-245,H:168-413^58.13%ID^E:8.97e-104^RecName: Full=Nematode resistance protein-like HSPRO1;^Eukaryota; Viridiplantae; Streptophyta; Embryophyta; Tracheophyta; Spermatophyta; Magnoliophyta; eudicotyledons; Gunneridae; Pentapetalae; rosids; malvids; Brassicales; Brassicaceae; Camelineae; Arabidopsis	1	1	1		1	1	1	1	1	0	0	1	0	0	1	0	0	3.2	3.2	3.2	32.244	279	279	0.021622	-0.0023912	By MS/MS			3.2	0	0	3809800	3809800	0	0	8945400	0	0	0	0	0	0
Unspecific	c155321/1/2342|m.61562	c155321/1/2342|m.61562	c155321/1/2342|m.61562	CYPR4_CYNCA^CYPR4_CYNCA^Q:154-430,H:2-281^74.021%ID^E:2.38e-142^RecName: Full=Protein CYPRO4;^Eukaryota; Viridiplantae; Streptophyta; Embryophyta; Tracheophyta; Spermatophyta; Magnoliophyta; eudicotyledons; Gunneridae; Pentapetalae; asterids; campanulids; Asterales; Asteraceae; Carduoideae; Cardueae; Carduinae; Cynara	1	1	1		1	1	1	1	1	1	1	1	1	1	1	1	1	2	2	2	51.319	460	460	0.020942	-0.0023912	By MS/MS	By matching	By matching	2	2	2	9481300	1230400	300670	7950200	0	0	12417000	0	0	0	0
Unspecific	c155421/1/1896|m.61634	c155421/1/1896|m.61634	c155421/1/1896|m.61634	NAC86_ARATH^NAC86_ARATH^Q:140-595,H:5-157^62.745%ID^E:1.25e-57^RecName: Full=NAC domain-containing protein 86 {ECO:0000312|EMBL:AED92405.1};^Eukaryota; Viridiplantae; Streptophyta; Embryophyta; Tracheophyta; Spermatophyta; Magnoliophyta; eudicotyledons; Gunneridae; Pentapetalae; rosids; malvids; Brassicales; Brassicaceae; Camelineae; Arabidopsis	1	1	1		1	1	1	1	0	1	1	0	1	1	0	1	1	6.7	6.7	6.7	14.642	135	135	0.020833	-0.0023912		By matching	By MS/MS	0	6.7	6.7	5676500	0	431410	5245100	0	0	8401800	0	0	0	0
Unspecific	c155540/1/1866|m.61728	c155540/1/1866|m.61728	c155540/1/1866|m.61728	IDD10_ARATH^IDD10_ARATH^Q:644-943,H:194-291^43.925%ID^E:3.41e-24^RecName: Full=Zinc finger protein JACKDAW;^Eukaryota; Viridiplantae; Streptophyta; Embryophyta; Tracheophyta; Spermatophyta; Magnoliophyta; eudicotyledons; Gunneridae; Pentapetalae; rosids; malvids; Brassicales; Brassicaceae; Camelineae; Arabidopsis`IDD10_ARATH^IDD10_ARATH^Q:567-647,H:168-194^100%ID^E:3.41e-24^RecName: Full=Zinc fin…	1	1	1		1	1	1	1	0	1	0	0	1	0	0	1	0	3.4	3.4	3.4	27.503	266	266	0.020725	-0.0023912		By MS/MS		0	3.4	0	4366900	0	4366900	0	0	18388000	0	0	0	0	0
Unspecific	c155540/1/1866|m.61729	c155540/1/1866|m.61729	c155540/1/1866|m.61729	IDD1_ARATH^IDD1_ARATH^Q:132-175,H:30-73^88.636%ID^E:4.43e-19^RecName: Full=Protein indeterminate-domain 1 {ECO:0000303|PubMed:16784536};^Eukaryota; Viridiplantae; Streptophyta; Embryophyta; Tracheophyta; Spermatophyta; Magnoliophyta; eudicotyledons; Gunneridae; Pentapetalae; rosids; malvids; Brassicales; Brassicaceae; Camelineae; Arabidopsis	1	1	1		1	1	1	1	1	0	0	1	0	0	1	0	0	4.1	4.1	4.1	24.726	219	219	0.020619	-0.0023912	By MS/MS			4.1	0	0	2483900	2483900	0	0	6222200	0	0	0	0	0	0
Unspecific	c156097/1/1695|m.62142	c156097/1/1695|m.62142	c156097/1/1695|m.62142	BLH7_ARATH^BLH7_ARATH^Q:103-355,H:67-312^54.373%ID^E:1.37e-78^RecName: Full=BEL1-like homeodomain protein 7;^Eukaryota; Viridiplantae; Streptophyta; Embryophyta; Tracheophyta; Spermatophyta; Magnoliophyta; eudicotyledons; Gunneridae; Pentapetalae; rosids; malvids; Brassicales; Brassicaceae; Camelineae; Arabidopsis	1	1	1		1	1	1	1	1	1	1	1	1	1	1	1	1	2.5	2.5	2.5	39.753	355	355	0.020305	-0.0023912	By matching	By MS/MS	By matching	2.5	2.5	2.5	59991000	31874000	9126900	18990000	0	0	47785000	0	0	0	0
Unspecific	c156811/1/1751|m.62728	c156811/1/1751|m.62728	c156811/1/1751|m.62728	SEC10_ARATH^SEC10_ARATH^Q:1-362,H:395-751^84.573%ID^E:0^RecName: Full=Exocyst complex component SEC10;^Eukaryota; Viridiplantae; Streptophyta; Embryophyta; Tracheophyta; Spermatophyta; Magnoliophyta; eudicotyledons; Gunneridae; Pentapetalae; rosids; malvids; Brassicales; Brassicaceae; Camelineae; Arabidopsis	1	1	1		1	1	1	1	1	0	0	1	0	0	1	0	0	2	2	2	48.161	442	442	0.020202	-0.0023912	By MS/MS			2	0	0	2638700	2638700	0	0	6610000	0	0	0	0	0	0
Unspecific	c157000/1/2042|m.62876	c157000/1/2042|m.62876	c157000/1/2042|m.62876	.	1	1	1		1	1	1	1	1	1	0	1	1	0	1	1	0	8.9	8.9	8.9	10.781	101	101	0.020101	-0.0023912	By MS/MS	By matching		8.9	8.9	0	2611800	727780	1884000	0	0	4101400	0	0	0	0	0
Unspecific	c157642/1/1370|m.63338	c157642/1/1370|m.63338	c157642/1/1370|m.63338	DCP5_ARATH^DCP5_ARATH^Q:1-84,H:470-554^57.471%ID^E:3.12e-24^RecName: Full=Protein decapping 5;^Eukaryota; Viridiplantae; Streptophyta; Embryophyta; Tracheophyta; Spermatophyta; Magnoliophyta; eudicotyledons; Gunneridae; Pentapetalae; rosids; malvids; Brassicales; Brassicaceae; Camelineae; Arabidopsis	1	1	1		1	1	1	1	1	1	0	1	1	0	1	1	0	6.9	6.9	6.9	15.951	131	131	0.02	-0.0023912	By MS/MS	By matching		6.9	6.9	0	2412400	1907400	505030	0	0	2126500	0	0	0	0	0
Unspecific	c158523/1/1455|m.64060	c158523/1/1455|m.64060	c158523/1/1455|m.64060	QORH_SPIOL^QORH_SPIOL^Q:309-875,H:60-228^29%ID^E:3.54e-09^RecName: Full=Quinone-oxidoreductase homolog, chloroplastic;^Eukaryota; Viridiplantae; Streptophyta; Embryophyta; Tracheophyta; Spermatophyta; Magnoliophyta; eudicotyledons; Gunneridae; Pentapetalae; Caryophyllales; Amaranthaceae; Chenopodioideae; Anserineae; Spinacia`QORH_SPIOL^QORH_SPIOL^Q:946-1161,H:253-324^39.726%ID^E:3.54e-09^RecName:…	1	1	1		1	1	1	1	1	1	0	1	1	0	1	1	0	7.6	7.6	7.6	12.567	118	118	0.019802	-0.0023912	By matching	By MS/MS		7.6	7.6	0	3669200	3268700	400480	0	4143400	0	0	0	0	0	0
Unspecific	c159038/1/1459|m.64446	c159038/1/1459|m.64446	c159038/1/1459|m.64446	.	1	1	1		1	1	1	1	1	1	0	1	1	0	1	1	0	5.5	5.5	5.5	18.45	164	164	0.019608	-0.0023912	By MS/MS	By MS/MS		5.5	5.5	0	7116300	7045200	71087	0	27856000	0	0	0	0	0	0
Unspecific	c159995/1/1645|m.65235	c159995/1/1645|m.65235	c159995/1/1645|m.65235	.	1	1	1		1	1	1	1	1	1	1	1	1	1	1	1	1	3.9	3.9	3.9	25.659	230	230	0.019324	-0.0023912	By MS/MS	By matching	By matching	3.9	3.9	3.9	16261000	11220000	1088700	3952400	0	0	5992000	0	0	0	0
Unspecific	c161049/1/1541|m.66048	c161049/1/1541|m.66048	c161049/1/1541|m.66048	MA658_ARATH^MA658_ARATH^Q:3-482,H:10-487^65.833%ID^E:0^RecName: Full=65-kDa microtubule-associated protein 8;^Eukaryota; Viridiplantae; Streptophyta; Embryophyta; Tracheophyta; Spermatophyta; Magnoliophyta; eudicotyledons; Gunneridae; Pentapetalae; rosids; malvids; Brassicales; Brassicaceae; Camelineae; Arabidopsis	1	1	1		1	1	1	1	0	0	1	0	0	1	0	0	1	1.9	1.9	1.9	56.36	482	482	0.019231	-0.0023912			By MS/MS	0	0	1.9	177460	0	0	177460	0	0	269030	0	0	0	0
Unspecific	c163415/1/3242|m.67827	c163415/1/3242|m.67827	c163415/1/3242|m.67827	CIP2_THIHA^CIP2_THIHA^Q:37-322,H:122-389^26.621%ID^E:1.42e-06^RecName: Full=4-O-methyl-glucuronoyl methylesterase;^Eukaryota; Fungi; Dikarya; Ascomycota; Pezizomycotina; Sordariomycetes; Sordariomycetidae; Sordariales; Chaetomiaceae; Myceliophthora	1	1	1		1	1	1	1	0	0	1	0	0	1	0	0	1	2.5	2.5	2.5	38.434	353	353	0.021505	-0.0023912			By MS/MS	0	0	2.5	119300	0	0	119300	0	0	282430	0	0	0	0
Unspecific	c164979/1/2286|m.69032	c164979/1/2286|m.69032	c164979/1/2286|m.69032	TUL1_YEAST^TUL1_YEAST^Q:929-1780,H:410-757^29.31%ID^E:1.36e-35^RecName: Full=Transmembrane E3 ubiquitin-protein ligase 1;^Eukaryota; Fungi; Dikarya; Ascomycota; Saccharomycotina; Saccharomycetes; Saccharomycetales; Saccharomycetaceae; Saccharomyces	1	1	1		1	1	1	1	1	0	0	1	0	0	1	0	0	3.7	3.7	3.7	28.139	241	241	0.018692	-0.0023912	By MS/MS			3.7	0	0	4761300	4761300	0	0	11927000	0	0	0	0	0	0
Unspecific	c166557/1/1294|m.70215	c166557/1/1294|m.70215	c166557/1/1294|m.70215	GDL62_ARATH^GDL62_ARATH^Q:402-1055,H:104-344^28.98%ID^E:1.07e-30^RecName: Full=GDSL esterase/lipase At4g10955;^Eukaryota; Viridiplantae; Streptophyta; Embryophyta; Tracheophyta; Spermatophyta; Magnoliophyta; eudicotyledons; Gunneridae; Pentapetalae; rosids; malvids; Brassicales; Brassicaceae; Camelineae; Arabidopsis`GDL62_ARATH^GDL62_ARATH^Q:94-354,H:9-88^32.955%ID^E:1.07e-30^RecName: Full=GDSL e…	1	1	1		1	1	1	1	1	0	1	1	0	1	1	0	1	6	6	6	16.682	151	151	0.018605	-0.0023912	By MS/MS		By matching	6	0	6	5197700	4819000	0	378690	8573500	0	0	0	0	0	0
Unspecific	c166672/1/2188|m.70307	c166672/1/2188|m.70307	c166672/1/2188|m.70307	.	1	1	1		1	1	1	1	1	1	1	1	1	1	1	1	1	4.8	4.8	4.8	21.839	189	189	0.018519	-0.0023912	By matching	By MS/MS	By matching	4.8	4.8	4.8	15518000	10445000	1216900	3856600	0	0	12336000	0	0	0	0
Unspecific	c167536/1/1627|m.70968	c167536/1/1627|m.70968	c167536/1/1627|m.70968	.	1	1	1		1	1	1	1	0	1	0	0	1	0	0	1	0	2.6	2.6	2.6	37.985	340	340	0.018433	-0.0023912		By MS/MS		0	2.6	0	1303800	0	1303800	0	0	5490000	0	0	0	0	0
Unspecific	c168100/1/1302|m.71388	c168100/1/1302|m.71388	c168100/1/1302|m.71388	FAMT_PSEPU^FAMT_PSEPU^Q:73-241,H:52-212^31.361%ID^E:4.25e-18^RecName: Full=Probable fatty acid methyltransferase;^Bacteria; Proteobacteria; Gammaproteobacteria; Pseudomonadales; Pseudomonadaceae; Pseudomonas	1	1	1		1	1	1	1	1	0	0	1	0	0	1	0	0	3.5	3.5	3.5	29.311	256	256	0.018265	-0.0023912	By MS/MS			3.5	0	0	648530	648530	0	0	1624600	0	0	0	0	0	0
Unspecific	c168123/1/1978|m.71415	c168123/1/1978|m.71415	c168123/1/1978|m.71415	.	1	1	1		1	1	1	1	1	1	0	1	1	0	1	1	0	7.1	7.1	7.1	14.017	126	126	0.018182	-0.0023912	By MS/MS	By matching		7.1	7.1	0	2711900	1078500	1633400	0	0	3868300	0	0	0	0	0
Unspecific	c168188/1/1227|m.71457	c168188/1/1227|m.71457	c168188/1/1227|m.71457	AT21A_ARATH^AT21A_ARATH^Q:48-399,H:26-372^36.134%ID^E:1.29e-55^RecName: Full=Putative RING-H2 finger protein ATL21A;^Eukaryota; Viridiplantae; Streptophyta; Embryophyta; Tracheophyta; Spermatophyta; Magnoliophyta; eudicotyledons; Gunneridae; Pentapetalae; rosids; malvids; Brassicales; Brassicaceae; Camelineae; Arabidopsis	1	1	1		1	1	1	1	1	1	0	1	1	0	1	1	0	2.2	2.2	2.2	44.492	403	403	0.0181	-0.0023912	By matching	By MS/MS		2.2	2.2	0	11622000	3427700	8194600	0	0	34505000	0	0	0	0	0
Unspecific	c169129/1/1208|m.72186	c169129/1/1208|m.72186	c169129/1/1208|m.72186	ARFR_ORYSJ^ARFR_ORYSJ^Q:6-119,H:483-604^40.476%ID^E:3.7e-11^RecName: Full=Auxin response factor 18;^Eukaryota; Viridiplantae; Streptophyta; Embryophyta; Tracheophyta; Spermatophyta; Magnoliophyta; Liliopsida; Poales; Poaceae; BEP clade; Ehrhartoideae; Oryzeae; Oryza	1	1	1		1	1	1	1	0	1	0	0	1	0	0	1	0	5.7	5.7	5.7	17.027	157	157	0.018018	-0.0023912		By MS/MS		0	5.7	0	2009000	0	2009000	0	0	8459500	0	0	0	0	0
Unspecific	c169541/1/1636|m.72528	c169541/1/1636|m.72528	c169541/1/1636|m.72528	OTU_ARATH^OTU_ARATH^Q:41-233,H:117-310^66.495%ID^E:3.91e-90^RecName: Full=OTU domain-containing protein At3g57810;^Eukaryota; Viridiplantae; Streptophyta; Embryophyta; Tracheophyta; Spermatophyta; Magnoliophyta; eudicotyledons; Gunneridae; Pentapetalae; rosids; malvids; Brassicales; Brassicaceae; Camelineae; Arabidopsis	1	1	1		1	1	1	1	1	1	1	1	1	1	1	1	1	3.8	3.8	3.8	26.471	238	238	0.017857	-0.0023912	By matching	By MS/MS	By matching	3.8	3.8	3.8	42127000	21060000	18159000	2907900	50490000	0	0	0	0	0	0
Unspecific	c170537/1/2439|m.73323	c170537/1/2439|m.73323	c170537/1/2439|m.73323	SEC5A_ARATH^SEC5A_ARATH^Q:1-338,H:1-346^57.423%ID^E:6.78e-113^RecName: Full=Exocyst complex component SEC5A;^Eukaryota; Viridiplantae; Streptophyta; Embryophyta; Tracheophyta; Spermatophyta; Magnoliophyta; eudicotyledons; Gunneridae; Pentapetalae; rosids; malvids; Brassicales; Brassicaceae; Camelineae; Arabidopsis	1	1	1		1	1	1	1	1	1	1	1	1	1	1	1	1	2.6	2.6	2.6	38.415	343	343	0.017699	-0.0023912	By matching	By MS/MS	By matching	2.6	2.6	2.6	2146000	1134400	485980	525540	0	0	1725000	0	0	0	0
Unspecific	c170951/1/1217|m.73611	c170951/1/1217|m.73611	c170951/1/1217|m.73611	.	1	1	1		1	1	1	1	1	0	0	1	0	0	1	0	0	3.9	3.9	3.9	25.733	229	229	0.017621	-0.0023912	By MS/MS			3.9	0	0	3494900	3494900	0	0	8601800	0	0	0	0	0	0
Unspecific	c171004/1/1960|m.73655	c171004/1/1960|m.73655	c171004/1/1960|m.73655	.	1	1	1		1	1	1	1	0	1	0	0	1	0	0	1	0	5.3	5.3	5.3	19.268	169	169	0.017544	-0.0023912		By MS/MS		0	5.3	0	145820	0	145820	0	0	614000	0	0	0	0	0
Unspecific	c171151/1/1557|m.73759	c171151/1/1557|m.73759	c171151/1/1557|m.73759	SHGR2_ARATH^SHGR2_ARATH^Q:871-1209,H:697-809^62.832%ID^E:4.4e-44^RecName: Full=Phospholipase SGR2;^Eukaryota; Viridiplantae; Streptophyta; Embryophyta; Tracheophyta; Spermatophyta; Magnoliophyta; eudicotyledons; Gunneridae; Pentapetalae; rosids; malvids; Brassicales; Brassicaceae; Camelineae; Arabidopsis`SHGR2_ARATH^SHGR2_ARATH^Q:1-249,H:410-492^63.855%ID^E:5.52e-23^RecName: Full=Phospholipase SG…	1	1	1		1	1	1	1	1	0	0	1	0	0	1	0	0	6.2	6.2	6.2	15.923	146	146	0.017467	-0.0023912	By MS/MS			6.2	0	0	783580	783580	0	0	1962900	0	0	0	0	0	0
Unspecific	c1851/3/1537|m.2071	c1851/3/1537|m.2071	c1851/3/1537|m.2071	PGAP3_DROME^PGAP3_DROME^Q:37-357,H:7-310^31.889%ID^E:9.31e-50^RecName: Full=Post-GPI attachment to proteins factor 3;^Eukaryota; Metazoa; Ecdysozoa; Arthropoda; Hexapoda; Insecta; Pterygota; Neoptera; Endopterygota; Diptera; Brachycera; Muscomorpha; Ephydroidea; Drosophilidae; Drosophila; Sophophora	1	1	1		1	1	1	1	1	1	1	1	1	1	1	1	1	2.4	2.4	2.4	43.438	375	375	0.017241	-0.0023912	By MS/MS	By matching	By matching	2.4	2.4	2.4	5417200	1385100	1409700	2622400	0	0	6510200	0	0	0	0
Unspecific	c199575/3/1865|m.75819	c199575/3/1865|m.75819	c199575/3/1865|m.75819	HNRPQ_RAT^HNRPQ_RAT^Q:470-1300,H:67-335^35.612%ID^E:3.1e-45^RecName: Full=Heterogeneous nuclear ribonucleoprotein Q;^Eukaryota; Metazoa; Chordata; Craniata; Vertebrata; Euteleostomi; Mammalia; Eutheria; Euarchontoglires; Glires; Rodentia; Sciurognathi; Muroidea; Muridae; Murinae; Rattus	1	1	1		1	1	1	1	1	0	0	1	0	0	1	0	0	9	9	9	11.616	100	100	0.017094	-0.0023912	By MS/MS			9	0	0	2232700	2232700	0	0	5593000	0	0	0	0	0	0
Unspecific	c199837/1/2535|m.76128	c199837/1/2535|m.76128	c199837/1/2535|m.76128	NAC78_ARATH^NAC78_ARATH^Q:338-535,H:58-123^56.061%ID^E:1.76e-27^RecName: Full=NAC domain-containing protein 78;^Eukaryota; Viridiplantae; Streptophyta; Embryophyta; Tracheophyta; Spermatophyta; Magnoliophyta; eudicotyledons; Gunneridae; Pentapetalae; rosids; malvids; Brassicales; Brassicaceae; Camelineae; Arabidopsis`NAC78_ARATH^NAC78_ARATH^Q:529-642,H:122-159^63.158%ID^E:1.76e-27^RecName: Full=N…	1	1	1		1	1	1	1	0	1	0	0	1	0	0	1	0	7.8	7.8	7.8	12.892	116	116	0.017021	-0.0023912		By MS/MS		0	7.8	0	356570	0	356570	0	0	1501400	0	0	0	0	0
Unspecific	c199952/1/1441|m.76231	c199952/1/1441|m.76231	c199952/1/1441|m.76231	.	1	1	1		1	1	1	1	1	0	0	1	0	0	1	0	0	9.1	9.1	9.1	10.793	99	99	0.016949	-0.0023912	By MS/MS			9.1	0	0	4209000	4209000	0	0	10544000	0	0	0	0	0	0
Unspecific	c200339/1/1504|m.76535	c200339/1/1504|m.76535	c200339/1/1504|m.76535	AKR2_ARATH^AKR2_ARATH^Q:681-1151,H:186-340^70.701%ID^E:3.54e-92^RecName: Full=Ankyrin repeat domain-containing protein 2;^Eukaryota; Viridiplantae; Streptophyta; Embryophyta; Tracheophyta; Spermatophyta; Magnoliophyta; eudicotyledons; Gunneridae; Pentapetalae; rosids; malvids; Brassicales; Brassicaceae; Camelineae; Arabidopsis`AKR2_ARATH^AKR2_ARATH^Q:302-691,H:45-189^53.793%ID^E:3.54e-92^RecName:…	1	1	1		1	1	1	1	1	0	0	1	0	0	1	0	0	7.7	7.7	7.7	13.022	117	117	0.016807	-0.0023912	By MS/MS			7.7	0	0	2508400	2508400	0	0	5989000	0	0	0	0	0	0
Unspecific	c200616/1/1807|m.76738	c200616/1/1807|m.76738	c200616/1/1807|m.76738	RAI14_HUMAN^RAI14_HUMAN^Q:381-653,H:88-171^35.87%ID^E:8.11e-06^RecName: Full=Ankycorbin;^Eukaryota; Metazoa; Chordata; Craniata; Vertebrata; Euteleostomi; Mammalia; Eutheria; Euarchontoglires; Primates; Haplorrhini; Catarrhini; Hominidae; Homo	1	1	1		1	1	1	1	1	0	1	1	0	1	1	0	1	4	4	4	25.893	227	227	0.016667	-0.0023912	By MS/MS		By matching	4	0	4	3135300	2233400	0	901970	2550600	0	0	0	0	0	0
Unspecific	c201522/1/1396|m.77474	c201522/1/1396|m.77474	c201522/1/1396|m.77474	GLNA_VIGAC^GLNA_VIGAC^Q:120-1145,H:15-356^87.135%ID^E:0^RecName: Full=Glutamine synthetase nodule isozyme;^Eukaryota; Viridiplantae; Streptophyta; Embryophyta; Tracheophyta; Spermatophyta; Magnoliophyta; eudicotyledons; Gunneridae; Pentapetalae; rosids; fabids; Fabales; Fabaceae; Papilionoideae; Phaseoleae; Vigna	1	1	1		1	1	1	1	0	0	1	0	0	1	0	0	1	7.2	7.2	7.2	14.236	125	125	0.016529	-0.0023912			By MS/MS	0	0	7.2	8994300	0	0	8994300	0	0	13636000	0	0	0	0
Unspecific	c202037/1/1791|m.77882	c202037/1/1791|m.77882	c202037/1/1791|m.77882	TCMO_ARATH^TCMO_ARATH^Q:1-109,H:117-230^51.304%ID^E:2.21e-22^RecName: Full=Trans-cinnamate 4-monooxygenase;^Eukaryota; Viridiplantae; Streptophyta; Embryophyta; Tracheophyta; Spermatophyta; Magnoliophyta; eudicotyledons; Gunneridae; Pentapetalae; rosids; malvids; Brassicales; Brassicaceae; Camelineae; Arabidopsis	1	1	1		1	1	1	1	1	0	1	1	0	1	1	0	1	8	8	8	12.676	112	112	0.016393	-0.0023912	By MS/MS		By matching	8	0	8	19808000	15085000	0	4722800	31445000	0	0	0	0	0	0
Unspecific	c203091/1/1412|m.78796	c203091/1/1412|m.78796	c203091/1/1412|m.78796	VAP22_ARATH^VAP22_ARATH^Q:1-196,H:1-206^45.894%ID^E:5.66e-51^RecName: Full=Vesicle-associated protein 2-2;^Eukaryota; Viridiplantae; Streptophyta; Embryophyta; Tracheophyta; Spermatophyta; Magnoliophyta; eudicotyledons; Gunneridae; Pentapetalae; rosids; malvids; Brassicales; Brassicaceae; Camelineae; Arabidopsis`VAP22_ARATH^VAP22_ARATH^Q:223-304,H:303-384^36.585%ID^E:5.78e-11^RecName: Full=Vesicl…	1	1	1		1	1	1	1	0	1	0	0	1	0	0	1	0	2.9	2.9	2.9	34.201	306	306	0.01626	-0.0023912		By MS/MS		0	2.9	0	206790	0	206790	0	0	870720	0	0	0	0	0
Unspecific	c204428/1/1913|m.79827	c204428/1/1913|m.79827	c204428/1/1913|m.79827	OCT7_ARATH^OCT7_ARATH^Q:15-126,H:1-112^71.429%ID^E:3.03e-47^RecName: Full=Organic cation/carnitine transporter 7;^Eukaryota; Viridiplantae; Streptophyta; Embryophyta; Tracheophyta; Spermatophyta; Magnoliophyta; eudicotyledons; Gunneridae; Pentapetalae; rosids; malvids; Brassicales; Brassicaceae; Camelineae; Arabidopsis	1	1	1		1	1	1	1	1	0	1	1	0	1	1	0	1	5.7	5.7	5.7	17.468	158	158	0.016129	-0.0023912	By MS/MS		By matching	5.7	0	5.7	926650	530790	0	395860	0	0	1895800	0	0	0	0
Unspecific	c204581/1/1860|m.79929	c204581/1/1860|m.79929	c204581/1/1860|m.79929	UBA2A_ARATH^UBA2A_ARATH^Q:586-1068,H:158-323^47.59%ID^E:7.74e-46^RecName: Full=UBP1-associated protein 2A;^Eukaryota; Viridiplantae; Streptophyta; Embryophyta; Tracheophyta; Spermatophyta; Magnoliophyta; eudicotyledons; Gunneridae; Pentapetalae; rosids; malvids; Brassicales; Brassicaceae; Camelineae; Arabidopsis`UBA2A_ARATH^UBA2A_ARATH^Q:407-595,H:98-160^69.841%ID^E:7.74e-46^RecName: Full=UBP1-as…	1	1	1		1	1	1	1	1	0	1	1	0	1	1	0	1	6.9	6.9	6.9	13.738	131	131	0.016064	-0.0023912	By MS/MS		By matching	6.9	0	6.9	1468900	1268200	0	200630	0	0	960840	0	0	0	0
Unspecific	c204599/1/1440|m.79948	c204599/1/1440|m.79948	c204599/1/1440|m.79948	ENO_NEUCR^ENO_NEUCR^Q:23-439,H:1-438^84.018%ID^E:0^RecName: Full=Enolase;^Eukaryota; Fungi; Dikarya; Ascomycota; Pezizomycotina; Sordariomycetes; Sordariomycetidae; Sordariales; Sordariaceae; Neurospora	1	1	1		1	1	1	1	1	0	0	1	0	0	1	0	0	2.1	2.1	2.1	48.164	439	439	0.016	-0.0023912	By MS/MS			2.1	0	0	1733600	1733600	0	0	4191300	0	0	0	0	0	0
Unspecific	c205136/1/2264|m.80394	c205136/1/2264|m.80394	c205136/1/2264|m.80394	KCS11_ARATH^KCS11_ARATH^Q:1-148,H:215-362^81.081%ID^E:6.95e-82^RecName: Full=3-ketoacyl-CoA synthase 11;^Eukaryota; Viridiplantae; Streptophyta; Embryophyta; Tracheophyta; Spermatophyta; Magnoliophyta; eudicotyledons; Gunneridae; Pentapetalae; rosids; malvids; Brassicales; Brassicaceae; Camelineae; Arabidopsis	1	1	1		1	1	1	1	0	1	0	0	1	0	0	1	0	5.6	5.6	5.6	17.683	161	161	0.01581	-0.0023912		By MS/MS		0	5.6	0	5605400	0	5605400	0	0	23603000	0	0	0	0	0
Unspecific	c205369/1/2329|m.80598	c205369/1/2329|m.80598	c205369/1/2329|m.80598	RIBA1_ARATH^RIBA1_ARATH^Q:36-539,H:36-532^76.181%ID^E:0^RecName: Full=Bifunctional riboflavin biosynthesis protein RIBA 1, chloroplastic;^Eukaryota; Viridiplantae; Streptophyta; Embryophyta; Tracheophyta; Spermatophyta; Magnoliophyta; eudicotyledons; Gunneridae; Pentapetalae; rosids; malvids; Brassicales; Brassicaceae; Camelineae; Arabidopsis	1	1	1		1	1	1	1	1	0	1	1	0	1	1	0	1	1.6	1.6	1.6	60.653	556	556	0.015748	-0.0023912	By MS/MS		By matching	1.6	0	1.6	4769700	2667200	0	2102600	0	0	5543600	0	0	0	0
Unspecific	c205384/1/1261|m.80613	c205384/1/1261|m.80613	c205384/1/1261|m.80613	CSTR2_ARATH^CSTR2_ARATH^Q:295-423,H:300-342^83.721%ID^E:8.46e-16^RecName: Full=CMP-sialic acid transporter 2;^Eukaryota; Viridiplantae; Streptophyta; Embryophyta; Tracheophyta; Spermatophyta; Magnoliophyta; eudicotyledons; Gunneridae; Pentapetalae; rosids; malvids; Brassicales; Brassicaceae; Camelineae; Arabidopsis`CSTR2_ARATH^CSTR2_ARATH^Q:516-572,H:343-361^73.684%ID^E:8.46e-16^RecName: Full=CMP…	1	1	1		1	1	1	1	1	1	1	1	1	1	1	1	1	8	8	8	13.622	112	112	0.015686	-0.0023912	By matching	By MS/MS	By matching	8	8	8	5190100	876690	248990	4064400	0	0	12134000	0	0	0	0
Unspecific	c205841/1/1793|m.81000	c205841/1/1793|m.81000	c205841/1/1793|m.81000	TC159_ARATH^TC159_ARATH^Q:256-463,H:1295-1503^72.727%ID^E:5.84e-99^RecName: Full=Translocase of chloroplast 159, chloroplastic;^Eukaryota; Viridiplantae; Streptophyta; Embryophyta; Tracheophyta; Spermatophyta; Magnoliophyta; eudicotyledons; Gunneridae; Pentapetalae; rosids; malvids; Brassicales; Brassicaceae; Camelineae; Arabidopsis	1	1	1		1	1	1	1	1	1	1	1	1	1	1	1	1	1.9	1.9	1.9	50.027	463	463	0.015564	-0.0023912	By MS/MS	By MS/MS	By matching	1.9	1.9	1.9	2235500	1498000	83486	654040	2400200	0	0	0	0	0	0
Unspecific	c206068/1/1942|m.81173	c206068/1/1942|m.81173	c206068/1/1942|m.81173	BRTL3_ARATH^BRTL3_ARATH^Q:1-282,H:143-424^71.277%ID^E:3.18e-139^RecName: Full=Probable mitochondrial adenine nucleotide transporter BTL3;^Eukaryota; Viridiplantae; Streptophyta; Embryophyta; Tracheophyta; Spermatophyta; Magnoliophyta; eudicotyledons; Gunneridae; Pentapetalae; rosids; malvids; Brassicales; Brassicaceae; Camelineae; Arabidopsis	1	1	1		1	1	1	1	1	1	1	1	1	1	1	1	1	3.1	3.1	3.1	31.958	289	289	0.015504	-0.0023912	By matching	By MS/MS	By matching	3.1	3.1	3.1	45726000	26824000	13697000	5204600	0	0	15502000	0	0	0	0
Unspecific	c206114/1/1366|m.81205	c206114/1/1366|m.81205	c206114/1/1366|m.81205	COPA2_ARATH^COPA2_ARATH^Q:21-108,H:4-94^81.319%ID^E:1.23e-44^RecName: Full=Coatomer subunit alpha-2;^Eukaryota; Viridiplantae; Streptophyta; Embryophyta; Tracheophyta; Spermatophyta; Magnoliophyta; eudicotyledons; Gunneridae; Pentapetalae; rosids; malvids; Brassicales; Brassicaceae; Camelineae; Arabidopsis`COPA2_ARATH^COPA2_ARATH^Q:20-93,H:45-118^29.73%ID^E:4.14e-06^RecName: Full=Coatomer subunit…	1	1	1		1	1	1	1	0	0	1	0	0	1	0	0	1	8.3	8.3	8.3	12.488	109	109	0.015444	-0.0023912			By MS/MS	0	0	8.3	4742100	0	0	4742100	0	0	7189200	0	0	0	0
Unspecific	c207185/1/2129|m.82034	c207185/1/2129|m.82034	c207185/1/2129|m.82034	RH8_ARATH^RH8_ARATH^Q:49-91,H:72-114^48.837%ID^E:5.35e-08^RecName: Full=DEAD-box ATP-dependent RNA helicase 8;^Eukaryota; Viridiplantae; Streptophyta; Embryophyta; Tracheophyta; Spermatophyta; Magnoliophyta; eudicotyledons; Gunneridae; Pentapetalae; rosids; malvids; Brassicales; Brassicaceae; Camelineae; Arabidopsis	1	1	1		1	1	1	1	0	0	1	0	0	1	0	0	1	7.9	7.9	7.9	12.468	114	114	0.015326	-0.0023912			By MS/MS	0	0	7.9	4061000	0	0	4061000	0	0	6156700	0	0	0	0
Unspecific	c207320/1/2399|m.82134	c207320/1/2399|m.82134	c207320/1/2399|m.82134	GAUT4_ARATH^GAUT4_ARATH^Q:1005-1904,H:228-537^47.484%ID^E:8.67e-89^RecName: Full=Probable galacturonosyltransferase 4;^Eukaryota; Viridiplantae; Streptophyta; Embryophyta; Tracheophyta; Spermatophyta; Magnoliophyta; eudicotyledons; Gunneridae; Pentapetalae; rosids; malvids; Brassicales; Brassicaceae; Camelineae; Arabidopsis`GAUT4_ARATH^GAUT4_ARATH^Q:827-1012,H:169-230^59.677%ID^E:8.67e-89^RecName…	1	1	1		1	1	1	1	0	1	0	0	1	0	0	1	0	8.3	8.3	8.3	12.132	109	109	0.015267	-0.0023912		By MS/MS		0	8.3	0	1387300	0	1387300	0	0	3020100	0	0	0	0	0
Unspecific	c207439/1/2617|m.82228	c207439/1/2617|m.82228	c207439/1/2617|m.82228	.	1	1	1		1	1	1	1	1	0	0	1	0	0	1	0	0	7	7	7	14.608	128	128	0.015152	-0.0023912	By MS/MS			7	0	0	1751900	1751900	0	0	4388500	0	0	0	0	0	0
Unspecific	c207907/1/2048|m.82628	c207907/1/2048|m.82628	c207907/1/2048|m.82628	.	1	1	1		1	1	1	1	1	1	0	1	1	0	1	1	0	6.5	6.5	6.5	15.141	138	138	0.015094	-0.0023912	By MS/MS	By matching		6.5	6.5	0	8273500	7506900	766670	0	18053000	0	0	0	0	0	0
Unspecific	c208008/1/1574|m.82705	c208008/1/1574|m.82705	c208008/1/1574|m.82705	SPY_ORYSJ^SPY_ORYSJ^Q:126-289,H:280-445^28.235%ID^E:1.07e-10^RecName: Full=Probable UDP-N-acetylglucosamine--peptide N-acetylglucosaminyltransferase SPINDLY;^Eukaryota; Viridiplantae; Streptophyta; Embryophyta; Tracheophyta; Spermatophyta; Magnoliophyta; Liliopsida; Poales; Poaceae; BEP clade; Ehrhartoideae; Oryzeae; Oryza`SPY_ORYSJ^SPY_ORYSJ^Q:164-270,H:147-251^32.71%ID^E:5.29e-08^RecName: Full=…	1	1	1		1	1	1	1	0	0	1	0	0	1	0	0	1	3.1	3.1	3.1	32.533	290	290	0.021277	-0.0023912			By MS/MS	0	0	3.1	4523700	0	0	4523700	0	0	6858100	0	0	0	0
Unspecific	c208300/1/2094|m.82906	c208300/1/2094|m.82906	c208300/1/2094|m.82906	KAD5_ARATH^KAD5_ARATH^Q:97-528,H:71-490^72.055%ID^E:0^RecName: Full=Adenylate kinase 5, chloroplastic;^Eukaryota; Viridiplantae; Streptophyta; Embryophyta; Tracheophyta; Spermatophyta; Magnoliophyta; eudicotyledons; Gunneridae; Pentapetalae; rosids; malvids; Brassicales; Brassicaceae; Camelineae; Arabidopsis	1	1	1		1	1	1	1	1	1	1	1	1	1	1	1	1	1.5	1.5	1.5	68.715	620	620	0.015038	-0.0023912	By MS/MS	By matching	By matching	1.5	1.5	1.5	11782000	6258500	4854400	668890	0	12805000	0	0	0	0	0
Unspecific	c208568/1/1953|m.83092	c208568/1/1953|m.83092	c208568/1/1953|m.83092	TBAD_PHYPO^TBAD_PHYPO^Q:124-282,H:4-55^71.698%ID^E:2.39e-15^RecName: Full=Tubulin alpha-1A chain;^Eukaryota; Amoebozoa; Mycetozoa; Myxogastria; Myxogastromycetidae; Physariida; Physaraceae; Physarum`TBAD_PHYPO^TBAD_PHYPO^Q:1009-1506,H:260-401^36.257%ID^E:5.09e-10^RecName: Full=Tubulin alpha-1A chain;^Eukaryota; Amoebozoa; Mycetozoa; Myxogastria; Myxogastromycetidae; Physariida; Physaraceae; Physa…	1	1	1		1	1	1	1	1	0	0	1	0	0	1	0	0	6.2	6.2	6.2	16.945	146	146	0.014981	-0.0023912	By MS/MS			6.2	0	0	5710900	5710900	0	0	13199000	0	0	0	0	0	0
Unspecific	c209615/1/1720|m.83933	c209615/1/1720|m.83933	c209615/1/1720|m.83933	HSD5_ARATH^HSD5_ARATH^Q:34-129,H:59-155^54.639%ID^E:1.5e-24^RecName: Full=11-beta-hydroxysteroid dehydrogenase-like 5;^Eukaryota; Viridiplantae; Streptophyta; Embryophyta; Tracheophyta; Spermatophyta; Magnoliophyta; eudicotyledons; Gunneridae; Pentapetalae; rosids; malvids; Brassicales; Brassicaceae; Camelineae; Arabidopsis	1	1	1		1	1	1	1	1	0	0	1	0	0	1	0	0	7	7	7	14.676	129	129	0.014925	-0.0023912	By MS/MS			7	0	0	1065500	1065500	0	0	1577900	0	0	0	0	0	0
Unspecific	c209704/1/1431|m.84016	c209704/1/1431|m.84016	c209704/1/1431|m.84016	. PREDICTED: protein starmaker-like [Juglans regia]^2.0^37%^XP_018845689.1	1	1	1		1	1	1	1	1	0	0	1	0	0	1	0	0	7.3	7.3	7.3	14.015	124	124	0.01487	-0.0023912	By MS/MS			7.3	0	0	2405900	2405900	0	0	10242000	0	0	0	0	0	0
Unspecific	c210485/1/2149|m.84645	c210485/1/2149|m.84645	c210485/1/2149|m.84645	TF3C5_HUMAN^TF3C5_HUMAN^Q:21-359,H:27-323^25.429%ID^E:2.35e-26^RecName: Full=General transcription factor 3C polypeptide 5;^Eukaryota; Metazoa; Chordata; Craniata; Vertebrata; Euteleostomi; Mammalia; Eutheria; Euarchontoglires; Primates; Haplorrhini; Catarrhini; Hominidae; Homo	1	1	1		1	1	1	1	1	0	0	1	0	0	1	0	0	1.5	1.5	1.5	67.593	591	591	0.01476	-0.0023912	By MS/MS			1.5	0	0	3940300	3940300	0	0	16774000	0	0	0	0	0	0
Unspecific	c212074/1/1748|m.85861	c212074/1/1748|m.85861	c212074/1/1748|m.85861	PUB40_ARATH^PUB40_ARATH^Q:3-502,H:30-534^52.805%ID^E:2.78e-160^RecName: Full=U-box domain-containing protein 40;^Eukaryota; Viridiplantae; Streptophyta; Embryophyta; Tracheophyta; Spermatophyta; Magnoliophyta; eudicotyledons; Gunneridae; Pentapetalae; rosids; malvids; Brassicales; Brassicaceae; Camelineae; Arabidopsis	1	1	1		1	1	1	1	1	1	1	1	1	1	1	1	1	1.8	1.8	1.8	55.106	504	504	0.014652	-0.0023912	By matching	By MS/MS	By matching	1.8	1.8	1.8	27801000	9448100	10658000	7694800	0	37124000	0	0	0	0	0
Unspecific	c212438/1/1525|m.86126	c212438/1/1525|m.86126	c212438/1/1525|m.86126	.	1	1	1		1	1	1	1	0	1	0	0	1	0	0	1	0	8.3	8.3	8.3	12.251	109	109	0.014545	-0.0023912		By MS/MS		0	8.3	0	637560	0	637560	0	0	2684600	0	0	0	0	0
Unspecific	c212758/1/4397|m.86388	c212758/1/4397|m.86388	c212758/1/4397|m.86388	.	1	1	1		1	1	1	1	1	0	0	1	0	0	1	0	0	4.6	4.6	4.6	21.657	196	196	0.01444	-0.0023912	By MS/MS			4.6	0	0	546330	546330	0	0	1368600	0	0	0	0	0	0
Unspecific	c213827/1/2364|m.87246	c213827/1/2364|m.87246	c213827/1/2364|m.87246	MPCP3_ARATH^MPCP3_ARATH^Q:307-1185,H:56-351^85.135%ID^E:1.01e-171^RecName: Full=Mitochondrial phosphate carrier protein 3, mitochondrial;^Eukaryota; Viridiplantae; Streptophyta; Embryophyta; Tracheophyta; Spermatophyta; Magnoliophyta; eudicotyledons; Gunneridae; Pentapetalae; rosids; malvids; Brassicales; Brassicaceae; Camelineae; Arabidopsis	1	1	1		1	1	1	1	1	1	0	1	1	0	1	1	0	6.1	6.1	6.1	16.838	147	147	0.014388	-0.0023912	By MS/MS	By matching		6.1	6.1	0	99827	67266	32561	0	164610	0	0	0	0	0	0
Unspecific	c213862/1/2330|m.87271	c213862/1/2330|m.87271	c213862/1/2330|m.87271	Y1919_SYNY3^Y1919_SYNY3^Q:5-129,H:177-282^35.433%ID^E:4.81e-15^RecName: Full=Uncharacterized protein slr1919;^Bacteria; Cyanobacteria; Oscillatoriophycideae; Chroococcales; Synechocystis	1	1	1		1	1	1	1	1	1	1	1	1	1	1	1	1	5.4	5.4	5.4	19.373	166	166	0.014337	-0.0023912	By matching	By MS/MS	By matching	5.4	5.4	5.4	1384100	671490	516080	196520	1600500	0	0	0	0	0	0
Unspecific	c214459/1/1370|m.87770	c214459/1/1370|m.87770	c214459/1/1370|m.87770	PVADH_PSESP^PVADH_PSESP^Q:31-248,H:253-452^31.739%ID^E:1.09e-25^RecName: Full=Polyvinylalcohol dehydrogenase;^Bacteria; Proteobacteria	1	1	1		1	1	1	1	1	1	1	1	1	1	1	1	1	3.6	3.6	3.6	27.102	252	252	0.014286	-0.0023912	By matching	By MS/MS	By matching	3.6	3.6	3.6	294250000	181220000	54483000	58544000	0	0	98616000	0	0	0	0
Unspecific	c215036/1/937|m.88214	c215036/1/937|m.88214	c215036/1/937|m.88214	IDD15_ARATH^IDD15_ARATH^Q:33-123,H:39-130^83.696%ID^E:1.21e-51^RecName: Full=Protein SHOOT GRAVITROPISM 5;^Eukaryota; Viridiplantae; Streptophyta; Embryophyta; Tracheophyta; Spermatophyta; Magnoliophyta; eudicotyledons; Gunneridae; Pentapetalae; rosids; malvids; Brassicales; Brassicaceae; Camelineae; Arabidopsis	1	1	1		1	1	1	1	1	0	1	1	0	1	1	0	1	6.2	6.2	6.2	16.299	145	145	0.014235	-0.0023912	By MS/MS		By matching	6.2	0	6.2	41263000	13725000	0	27538000	0	0	49814000	0	0	0	0
Unspecific	c215350/1/1348|m.88456	c215350/1/1348|m.88456	c215350/1/1348|m.88456	BRG3_ARATH^BRG3_ARATH^Q:835-1302,H:169-334^37.209%ID^E:3.72e-19^RecName: Full=Probable BOI-related E3 ubiquitin-protein ligase 3;^Eukaryota; Viridiplantae; Streptophyta; Embryophyta; Tracheophyta; Spermatophyta; Magnoliophyta; eudicotyledons; Gunneridae; Pentapetalae; rosids; malvids; Brassicales; Brassicaceae; Camelineae; Arabidopsis	1	1	1		1	1	1	1	1	0	0	1	0	0	1	0	0	7	7	7	14.797	128	128	0.014184	-0.0023912	By MS/MS			7	0	0	5028400	5028400	0	0	21406000	0	0	0	0	0	0
Unspecific	c215641/1/1738|m.88700	c215641/1/1738|m.88700	c215641/1/1738|m.88700	PPH_ARATH^PPH_ARATH^Q:119-316,H:274-473^63.682%ID^E:1.85e-90^RecName: Full=Pheophytinase, chloroplastic;^Eukaryota; Viridiplantae; Streptophyta; Embryophyta; Tracheophyta; Spermatophyta; Magnoliophyta; eudicotyledons; Gunneridae; Pentapetalae; rosids; malvids; Brassicales; Brassicaceae; Camelineae; Arabidopsis	1	1	1		1	1	1	1	0	1	0	0	1	0	0	1	0	2.8	2.8	2.8	37.342	326	326	0.014134	-0.0023912		By MS/MS		0	2.8	0	5526900	0	5526900	0	0	26995000	0	0	0	0	0
Unspecific	c215647/1/1677|m.88709	c215647/1/1677|m.88709	c215647/1/1677|m.88709	CSLC5_ARATH^CSLC5_ARATH^Q:5-288,H:8-286^65.614%ID^E:5.35e-129^RecName: Full=Probable xyloglucan glycosyltransferase 5;^Eukaryota; Viridiplantae; Streptophyta; Embryophyta; Tracheophyta; Spermatophyta; Magnoliophyta; eudicotyledons; Gunneridae; Pentapetalae; rosids; malvids; Brassicales; Brassicaceae; Camelineae; Arabidopsis	1	1	1		1	1	1	1	1	0	0	1	0	0	1	0	0	2.9	2.9	2.9	35.941	310	310	0.014085	-0.0023912	By MS/MS			2.9	0	0	1462500	1462500	0	0	3663700	0	0	0	0	0	0
Unspecific	c215734/1/1223|m.88762	c215734/1/1223|m.88762	c215734/1/1223|m.88762	PPDEX_ARATH^PPDEX_ARATH^Q:15-209,H:18-206^53.333%ID^E:2.75e-70^RecName: Full=DeSI-like protein At4g17486;^Eukaryota; Viridiplantae; Streptophyta; Embryophyta; Tracheophyta; Spermatophyta; Magnoliophyta; eudicotyledons; Gunneridae; Pentapetalae; rosids; malvids; Brassicales; Brassicaceae; Camelineae; Arabidopsis	1	1	1		1	1	1	1	1	1	0	1	1	0	1	1	0	4.1	4.1	4.1	24.877	222	222	0.014035	-0.0023912	By matching	By MS/MS		4.1	4.1	0	618510	427160	191350	0	0	805710	0	0	0	0	0
Unspecific	c216245/1/1270|m.89175	c216245/1/1270|m.89175	c216245/1/1270|m.89175	SEC10_ARATH^SEC10_ARATH^Q:1-257,H:569-825^87.938%ID^E:5.8e-150^RecName: Full=Exocyst complex component SEC10;^Eukaryota; Viridiplantae; Streptophyta; Embryophyta; Tracheophyta; Spermatophyta; Magnoliophyta; eudicotyledons; Gunneridae; Pentapetalae; rosids; malvids; Brassicales; Brassicaceae; Camelineae; Arabidopsis	1	1	1		1	1	1	1	0	1	0	0	1	0	0	1	0	3.5	3.5	3.5	28.047	257	257	0.013986	-0.0023912		By MS/MS		0	3.5	0	382200	0	382200	0	0	1609300	0	0	0	0	0
Unspecific	c216492/1/1390|m.89397	c216492/1/1390|m.89397	c216492/1/1390|m.89397	B561P_ARATH^B561P_ARATH^Q:575-1015,H:214-358^68.027%ID^E:2.98e-97^RecName: Full=Cytochrome b561 and DOMON domain-containing protein At5g35735;^Eukaryota; Viridiplantae; Streptophyta; Embryophyta; Tracheophyta; Spermatophyta; Magnoliophyta; eudicotyledons; Gunneridae; Pentapetalae; rosids; malvids; Brassicales; Brassicaceae; Camelineae; Arabidopsis`B561P_ARATH^B561P_ARATH^Q:29-274,H:29-111^49.398%…	1	1	1		1	1	1	1	1	0	0	1	0	0	1	0	0	7.9	7.9	7.9	12.949	114	114	0.013937	-0.0023912	By MS/MS			7.9	0	0	8062500	8062500	0	0	12306000	0	0	0	0	0	0
Unspecific	c216796/1/1529|m.89691	c216796/1/1529|m.89691	c216796/1/1529|m.89691	HEX6_RICCO^HEX6_RICCO^Q:3-117,H:241-355^65.217%ID^E:7.37e-47^RecName: Full=Hexose carrier protein HEX6;^Eukaryota; Viridiplantae; Streptophyta; Embryophyta; Tracheophyta; Spermatophyta; Magnoliophyta; eudicotyledons; Gunneridae; Pentapetalae; rosids; fabids; Malpighiales; Euphorbiaceae; Acalyphoideae; Acalypheae; Ricinus	1	1	1		1	1	1	1	1	1	1	1	1	1	1	1	1	7.3	7.3	7.3	13.788	124	124	0.013889	-0.0023912	By matching	By MS/MS	By matching	7.3	7.3	7.3	21470000	16651000	2805200	2014000	35402000	0	0	0	0	0	0
Unspecific	c2450/1/1406|m.2661	c2450/1/1406|m.2661	c2450/1/1406|m.2661	NUP1_ARATH^NUP1_ARATH^Q:17-191,H:1091-1284^46.701%ID^E:7.88e-19^RecName: Full=Nuclear pore complex protein NUP1;^Eukaryota; Viridiplantae; Streptophyta; Embryophyta; Tracheophyta; Spermatophyta; Magnoliophyta; eudicotyledons; Gunneridae; Pentapetalae; rosids; malvids; Brassicales; Brassicaceae; Camelineae; Arabidopsis	1	1	1		1	1	1	1	1	0	0	1	0	0	1	0	0	4.4	4.4	4.4	20.555	204	204	0.013746	-0.0023912	By MS/MS			4.4	0	0	1282600	1282600	0	0	3212800	0	0	0	0	0	0
Unspecific	c246381/2/2234|m.91620	c246381/2/2234|m.91620	c246381/2/2234|m.91620	HMDH1_HEVBR^HMDH1_HEVBR^Q:10-75,H:25-90^87.879%ID^E:6.03e-33^RecName: Full=3-hydroxy-3-methylglutaryl-coenzyme A reductase 1;^Eukaryota; Viridiplantae; Streptophyta; Embryophyta; Tracheophyta; Spermatophyta; Magnoliophyta; eudicotyledons; Gunneridae; Pentapetalae; rosids; fabids; Malpighiales; Euphorbiaceae; Crotonoideae; Micrandreae; Hevea	1	1	1		1	1	1	1	1	0	1	1	0	1	1	0	1	4.9	4.9	4.9	20.815	182	182	0.013699	-0.0023912	By MS/MS		By matching	4.9	0	4.9	41976000	26124000	0	15852000	0	0	39719000	0	0	0	0
Unspecific	c248197/1/1661|m.93035	c248197/1/1661|m.93035	c248197/1/1661|m.93035	PYRD2_RAT^PYRD2_RAT^Q:9-252,H:20-277^45.353%ID^E:1.33e-62^RecName: Full=Pyridine nucleotide-disulfide oxidoreductase domain-containing protein 2;^Eukaryota; Metazoa; Chordata; Craniata; Vertebrata; Euteleostomi; Mammalia; Eutheria; Euarchontoglires; Glires; Rodentia; Sciurognathi; Muroidea; Muridae; Murinae; Rattus	1	1	1		1	1	1	1	1	0	0	1	0	0	1	0	0	3.4	3.4	3.4	29.229	262	262	0.013559	-0.0023912	By MS/MS			3.4	0	0	1932000	1932000	0	0	4839800	0	0	0	0	0	0
Unspecific	c249370/1/1763|m.93869	c249370/1/1763|m.93869	c249370/1/1763|m.93869	FPPS1_LUPAL^FPPS1_LUPAL^Q:1-80,H:38-117^81.25%ID^E:4.53e-43^RecName: Full=Farnesyl pyrophosphate synthase 1;^Eukaryota; Viridiplantae; Streptophyta; Embryophyta; Tracheophyta; Spermatophyta; Magnoliophyta; eudicotyledons; Gunneridae; Pentapetalae; rosids; fabids; Fabales; Fabaceae; Papilionoideae; Genisteae; Lupinus	1	1	1		1	1	1	1	0	1	1	0	1	1	0	1	1	7.3	7.3	7.3	14.612	124	124	0.013423	-0.0023912		By MS/MS	By matching	0	7.3	7.3	7033000	0	677910	6355100	0	0	17485000	0	0	0	0
Unspecific	c250170/1/1716|m.94462	c250170/1/1716|m.94462	c250170/1/1716|m.94462	PXN_ARATH^PXN_ARATH^Q:250-420,H:22-78^84.211%ID^E:3.4e-25^RecName: Full=Peroxisomal nicotinamide adenine dinucleotide carrier;^Eukaryota; Viridiplantae; Streptophyta; Embryophyta; Tracheophyta; Spermatophyta; Magnoliophyta; eudicotyledons; Gunneridae; Pentapetalae; rosids; malvids; Brassicales; Brassicaceae; Camelineae; Arabidopsis	1	1	1		1	1	1	1	1	1	0	1	1	0	1	1	0	8.7	8.7	8.7	11.715	103	103	0.013333	-0.0023912	By MS/MS	By matching		8.7	8.7	0	11597000	10717000	880330	0	17979000	0	0	0	0	0	0
Unspecific	c250487/1/2120|m.94718	c250487/1/2120|m.94718	c250487/1/2120|m.94718	.	1	1	1		1	1	1	1	1	1	1	1	1	1	1	1	1	4.9	4.9	4.9	22.04	183	183	0.013245	-0.0023912	By matching	By MS/MS	By matching	4.9	4.9	4.9	29646000	22541000	3627000	3478200	46321000	0	0	0	0	0	0
Unspecific	c250814/1/1600|m.94967	c250814/1/1600|m.94967	c250814/1/1600|m.94967	.	1	1	1		1	1	1	1	1	1	1	1	1	1	1	1	1	5.1	5.1	5.1	20.431	177	177	0.013201	-0.0023912	By matching	By MS/MS	By matching	5.1	5.1	5.1	54601000	861330	14480000	39260000	2060200	0	0	0	0	0	0
Unspecific	c251088/1/1860|m.95188	c251088/1/1860|m.95188	c251088/1/1860|m.95188	HMDH1_HEVBR^HMDH1_HEVBR^Q:83-506,H:156-573^85.849%ID^E:0^RecName: Full=3-hydroxy-3-methylglutaryl-coenzyme A reductase 1;^Eukaryota; Viridiplantae; Streptophyta; Embryophyta; Tracheophyta; Spermatophyta; Magnoliophyta; eudicotyledons; Gunneridae; Pentapetalae; rosids; fabids; Malpighiales; Euphorbiaceae; Crotonoideae; Micrandreae; Hevea`HMDH1_HEVBR^HMDH1_HEVBR^Q:36-111,H:11-80^60.526%ID^E:1.06e-2…	1	1	1		1	1	1	1	0	1	0	0	1	0	0	1	0	1.8	1.8	1.8	54.217	508	508	0.013115	-0.0023912		By MS/MS		0	1.8	0	616950	0	616950	0	0	2597800	0	0	0	0	0
Unspecific	c251445/1/1456|m.95422	c251445/1/1456|m.95422	c251445/1/1456|m.95422	.	1	1	1		1	1	1	1	1	0	0	1	0	0	1	0	0	7.3	7.3	7.3	14.478	123	123	0.013072	-0.0023912	By MS/MS			7.3	0	0	711630	711630	0	0	3029400	0	0	0	0	0	0
Unspecific	c251990/1/1949|m.95839	c251990/1/1949|m.95839	c251990/1/1949|m.95839	SCYL2_MOUSE^SCYL2_MOUSE^Q:12-340,H:5-322^29.464%ID^E:1.55e-40^RecName: Full=SCY1-like protein 2;^Eukaryota; Metazoa; Chordata; Craniata; Vertebrata; Euteleostomi; Mammalia; Eutheria; Euarchontoglires; Glires; Rodentia; Sciurognathi; Muroidea; Muridae; Murinae; Mus; Mus	1	1	1		1	1	1	1	1	0	0	1	0	0	1	0	0	2.6	2.6	2.6	37.365	343	343	0.012987	-0.0023912	By MS/MS			2.6	0	0	1802100	1802100	0	0	4335600	0	0	0	0	0	0
Unspecific	c252681/1/1936|m.96373	c252681/1/1936|m.96373	c252681/1/1936|m.96373	DCYD2_ARATH^DCYD2_ARATH^Q:1-366,H:1-353^53.117%ID^E:6.16e-122^RecName: Full=D-cysteine desulfhydrase 2, mitochondrial;^Eukaryota; Viridiplantae; Streptophyta; Embryophyta; Tracheophyta; Spermatophyta; Magnoliophyta; eudicotyledons; Gunneridae; Pentapetalae; rosids; malvids; Brassicales; Brassicaceae; Camelineae; Arabidopsis	1	1	1		1	1	1	1	1	1	1	1	1	1	1	1	1	2.5	2.5	2.5	40.541	367	367	0.012903	-0.0023912	By matching	By MS/MS	By matching	2.5	2.5	2.5	49799000	27486000	14401000	7912400	47545000	0	0	0	0	0	0
Unspecific	c253782/2/2085|m.97207	c253782/2/2085|m.97207	c253782/2/2085|m.97207	DGDG1_LOTJA^DGDG1_LOTJA^Q:239-709,H:41-189^38.323%ID^E:9e-13^RecName: Full=Digalactosyldiacylglycerol synthase 1, chloroplastic;^Eukaryota; Viridiplantae; Streptophyta; Embryophyta; Tracheophyta; Spermatophyta; Magnoliophyta; eudicotyledons; Gunneridae; Pentapetalae; rosids; fabids; Fabales; Fabaceae; Papilionoideae; Loteae; Lotus`DGDG1_LOTJA^DGDG1_LOTJA^Q:153-494,H:13-127^39.516%ID^E:7.07e-06^Re…	1	1	1		1	1	1	1	0	1	0	0	1	0	0	1	0	7.8	7.8	7.8	13.569	116	116	0.012862	-0.0023912		By MS/MS		0	7.8	0	46523	0	46523	0	0	195900	0	0	0	0	0
Unspecific	c255261/1/2413|m.98375	c255261/1/2413|m.98375	c255261/1/2413|m.98375	ASPR_CUCPE^ASPR_CUCPE^Q:41-239,H:282-479^75.879%ID^E:2.83e-105^RecName: Full=Aspartic proteinase;^Eukaryota; Viridiplantae; Streptophyta; Embryophyta; Tracheophyta; Spermatophyta; Magnoliophyta; eudicotyledons; Gunneridae; Pentapetalae; rosids; fabids; Cucurbitales; Cucurbitaceae; Cucurbiteae; Cucurbita	1	1	1		1	1	1	1	1	0	0	1	0	0	1	0	0	3.1	3.1	3.1	31.532	295	295	0.012821	-0.0023912	By MS/MS			3.1	0	0	1826400	1826400	0	0	7774900	0	0	0	0	0	0
Unspecific	c256237/1/2529|m.99067	c256237/1/2529|m.99067	c256237/1/2529|m.99067	.	1	1	1		1	1	1	1	0	1	0	0	1	0	0	1	0	5.1	5.1	5.1	19.284	175	175	0.01278	-0.0023912		By MS/MS		0	5.1	0	385660	0	385660	0	0	1623900	0	0	0	0	0
Unspecific	c256353/1/1572|m.99163	c256353/1/1572|m.99163	c256353/1/1572|m.99163	ZIP11_ARATH^ZIP11_ARATH^Q:416-934,H:155-319^51.445%ID^E:8.35e-67^RecName: Full=Zinc transporter 11;^Eukaryota; Viridiplantae; Streptophyta; Embryophyta; Tracheophyta; Spermatophyta; Magnoliophyta; eudicotyledons; Gunneridae; Pentapetalae; rosids; malvids; Brassicales; Brassicaceae; Camelineae; Arabidopsis`ZIP11_ARATH^ZIP11_ARATH^Q:51-353,H:39-147^60.55%ID^E:8.35e-67^RecName: Full=Zinc transporter…	1	1	1		1	1	1	1	1	0	0	1	0	0	1	0	0	8.9	8.9	8.9	11.229	101	101	0.012739	-0.0023912	By MS/MS			8.9	0	0	62049	62049	0	0	155440	0	0	0	0	0	0
Unspecific	c256364/1/1362|m.99172	c256364/1/1362|m.99172	c256364/1/1362|m.99172	HFB2A_ARATH^HFB2A_ARATH^Q:16-104,H:175-264^43.956%ID^E:3.51e-14^RecName: Full=Heat stress transcription factor B-2a;^Eukaryota; Viridiplantae; Streptophyta; Embryophyta; Tracheophyta; Spermatophyta; Magnoliophyta; eudicotyledons; Gunneridae; Pentapetalae; rosids; malvids; Brassicales; Brassicaceae; Camelineae; Arabidopsis	1	1	1		1	1	1	1	1	1	0	1	1	0	1	1	0	5.6	5.6	5.6	17.631	162	162	0.012698	-0.0023912	By matching	By MS/MS		5.6	5.6	0	10316000	9314500	1001800	0	0	4218300	0	0	0	0	0
Unspecific	c256365/1/1609|m.99173	c256365/1/1609|m.99173	c256365/1/1609|m.99173	Y3567_ARATH^Y3567_ARATH^Q:1-92,H:338-429^60.215%ID^E:5.21e-30^RecName: Full=BTB/POZ domain-containing protein At3g05675;^Eukaryota; Viridiplantae; Streptophyta; Embryophyta; Tracheophyta; Spermatophyta; Magnoliophyta; eudicotyledons; Gunneridae; Pentapetalae; rosids; malvids; Brassicales; Brassicaceae; Camelineae; Arabidopsis	1	1	1		1	1	1	1	0	1	0	0	1	0	0	1	0	6.3	6.3	6.3	16.265	142	142	0.012658	-0.0023912		By MS/MS		0	6.3	0	1444800	0	1444800	0	0	6083500	0	0	0	0	0
Unspecific	c25655/1/1678|m.16023	c25655/1/1678|m.16023	c25655/1/1678|m.16023	BGAL3_ARATH^BGAL3_ARATH^Q:29-187,H:686-845^76.875%ID^E:3.41e-84^RecName: Full=Beta-galactosidase 3;^Eukaryota; Viridiplantae; Streptophyta; Embryophyta; Tracheophyta; Spermatophyta; Magnoliophyta; eudicotyledons; Gunneridae; Pentapetalae; rosids; malvids; Brassicales; Brassicaceae; Camelineae; Arabidopsis	1	1	1		1	1	1	1	0	1	0	0	1	0	0	1	0	4.5	4.5	4.5	21.982	201	201	0.012618	-0.0023912		By MS/MS		0	4.5	0	2567100	0	2567100	0	0	10809000	0	0	0	0	0
Unspecific	c257201/1/2094|m.99789	c257201/1/2094|m.99789	c257201/1/2094|m.99789	RPD1_ARATH^RPD1_ARATH^Q:1-213,H:158-382^31.556%ID^E:3.56e-23^RecName: Full=Protein ROOT PRIMORDIUM DEFECTIVE 1;^Eukaryota; Viridiplantae; Streptophyta; Embryophyta; Tracheophyta; Spermatophyta; Magnoliophyta; eudicotyledons; Gunneridae; Pentapetalae; rosids; malvids; Brassicales; Brassicaceae; Camelineae; Arabidopsis	1	1	1		1	1	1	1	1	1	0	1	1	0	1	1	0	3.5	3.5	3.5	30.153	254	254	0.012579	-0.0023912	By matching	By MS/MS		3.5	3.5	0	16243000	14609000	1634000	0	24569000	0	0	0	0	0	0
Unspecific	c257511/1/1833|m.100017	c257511/1/1833|m.100017	c257511/1/1833|m.100017	AGL2_BACTQ^AGL2_BACTQ^Q:385-1272,H:293-585^37.919%ID^E:7.18e-53^RecName: Full=Alpha-glucosidase 2;^Bacteria; Firmicutes; Bacilli; Bacillales; Bacillaceae; Bacillus`AGL2_BACTQ^AGL2_BACTQ^Q:285-395,H:258-294^59.459%ID^E:7.18e-53^RecName: Full=Alpha-glucosidase 2;^Bacteria; Firmicutes; Bacilli; Bacillales; Bacillaceae; Bacillus`AGL2_BACTQ^AGL2_BACTQ^Q:1278-1361,H:588-615^35.714%ID^E:7.18e-53^RecName…	1	1	1		1	1	1	1	1	1	1	1	1	1	1	1	1	4.2	4.2	4.2	23.972	214	214	0.012539	-0.0023912	By MS/MS	By matching	By matching	4.2	4.2	4.2	25053000	5165300	18757000	1131300	0	23613000	0	0	0	0	0
Unspecific	c257784/1/2467|m.100181	c257784/1/2467|m.100181	c257784/1/2467|m.100181	AVP_VIGRR^AVP_VIGRR^Q:27-209,H:5-241^58.824%ID^E:4.75e-77^RecName: Full=Pyrophosphate-energized vacuolar membrane proton pump;^Eukaryota; Viridiplantae; Streptophyta; Embryophyta; Tracheophyta; Spermatophyta; Magnoliophyta; eudicotyledons; Gunneridae; Pentapetalae; rosids; fabids; Fabales; Fabaceae; Papilionoideae; Phaseoleae; Vigna	1	1	1		1	1	1	1	1	1	0	1	1	0	1	1	0	3.2	3.2	3.2	31.194	284	284	0.0125	-0.0023912	By MS/MS	By matching		3.2	3.2	0	6593900	4764500	1829400	0	11002000	0	0	0	0	0	0
Unspecific	c258460/1/1944|m.100706	c258460/1/1944|m.100706	c258460/1/1944|m.100706	ACC1_ARATH^ACC1_ARATH^Q:1-93,H:1908-2000^52.688%ID^E:7.26e-24^RecName: Full=Acetyl-CoA carboxylase 1;^Eukaryota; Viridiplantae; Streptophyta; Embryophyta; Tracheophyta; Spermatophyta; Magnoliophyta; eudicotyledons; Gunneridae; Pentapetalae; rosids; malvids; Brassicales; Brassicaceae; Camelineae; Arabidopsis	1	1	1		1	1	1	1	1	0	1	1	0	1	1	0	1	8.7	8.7	8.7	11.783	103	103	0.012422	-0.0023912	By MS/MS		By matching	8.7	0	8.7	4046500	2054400	0	1992200	0	0	4716500	0	0	0	0
Unspecific	c259257/1/2017|m.101313	c259257/1/2017|m.101313	c259257/1/2017|m.101313	CIPKW_ORYSJ^CIPKW_ORYSJ^Q:871-1044,H:1-58^81.034%ID^E:2.89e-20^RecName: Full=CBL-interacting protein kinase 32;^Eukaryota; Viridiplantae; Streptophyta; Embryophyta; Tracheophyta; Spermatophyta; Magnoliophyta; Liliopsida; Poales; Poaceae; BEP clade; Ehrhartoideae; Oryzeae; Oryza	1	1	1		1	1	1	1	0	1	0	0	1	0	0	1	0	8.6	8.6	8.6	12.419	105	105	0.012346	-0.0023912		By MS/MS		0	8.6	0	648300	0	648300	0	0	1411300	0	0	0	0	0
Unspecific	c260278/1/1758|m.102045	c260278/1/1758|m.102045	c260278/1/1758|m.102045	CDKF1_ARATH^CDKF1_ARATH^Q:11-103,H:73-170^53.535%ID^E:3.74e-19^RecName: Full=Cyclin-dependent kinase F-1;^Eukaryota; Viridiplantae; Streptophyta; Embryophyta; Tracheophyta; Spermatophyta; Magnoliophyta; eudicotyledons; Gunneridae; Pentapetalae; rosids; malvids; Brassicales; Brassicaceae; Camelineae; Arabidopsis	1	1	1		1	1	1	1	1	0	0	1	0	0	1	0	0	8.7	8.7	8.7	11.542	104	104	0.012308	-0.0023912	By MS/MS			8.7	0	0	318420	318420	0	0	797650	0	0	0	0	0	0
Unspecific	c260510/1/1530|m.102240	c260510/1/1530|m.102240	c260510/1/1530|m.102240	WNK1_ARATH^WNK1_ARATH^Q:1-75,H:61-135^86.667%ID^E:4.85e-40^RecName: Full=Serine/threonine-protein kinase WNK1;^Eukaryota; Viridiplantae; Streptophyta; Embryophyta; Tracheophyta; Spermatophyta; Magnoliophyta; eudicotyledons; Gunneridae; Pentapetalae; rosids; malvids; Brassicales; Brassicaceae; Camelineae; Arabidopsis	1	1	1		1	1	1	1	1	0	0	1	0	0	1	0	0	7.5	7.5	7.5	14.033	120	120	0.01227	-0.0023912	By MS/MS			7.5	0	0	463570	463570	0	0	1161300	0	0	0	0	0	0
Unspecific	c261856/1/1180|m.103280	c261856/1/1180|m.103280	c261856/1/1180|m.103280	.	1	1	1		1	1	1	1	0	1	0	0	1	0	0	1	0	2.8	2.8	2.8	35.984	325	325	0.012158	-0.0023912		By MS/MS		0	2.8	0	4925600	0	4925600	0	0	17574000	0	0	0	0	0
Unspecific	c262192/1/2434|m.27	c262192/1/2434|m.27	c262192/1/2434|m.27	RPA1_SCHPO^RPA1_SCHPO^Q:1-325,H:435-749^46.667%ID^E:5.93e-92^RecName: Full=DNA-directed RNA polymerase I subunit rpa1;^Eukaryota; Fungi; Dikarya; Ascomycota; Taphrinomycotina; Schizosaccharomycetes; Schizosaccharomycetales; Schizosaccharomycetaceae; Schizosaccharomyces	1	1	1		1	1	1	1	1	1	0	1	1	0	1	1	0	2.8	2.8	2.8	36.494	325	325	0.012121	-0.0023912	By matching	By MS/MS		2.8	2.8	0	9901600	9177900	723700	0	12661000	0	0	0	0	0	0
Unspecific	c26283/1/1547|m.16440	c26283/1/1547|m.16440	c26283/1/1547|m.16440	ROC5_NICSY^ROC5_NICSY^Q:114-244,H:113-243^73.282%ID^E:1.08e-65^RecName: Full=33 kDa ribonucleoprotein, chloroplastic;^Eukaryota; Viridiplantae; Streptophyta; Embryophyta; Tracheophyta; Spermatophyta; Magnoliophyta; eudicotyledons; Gunneridae; Pentapetalae; asterids; lamiids; Solanales; Solanaceae; Nicotianoideae; Nicotianeae; Nicotiana`ROC5_NICSY^ROC5_NICSY^Q:116-189,H:218-291^32.432%ID^E:3.68e-0…	1	1	1		1	1	1	1	1	1	1	1	1	1	1	1	1	3.7	3.7	3.7	26.982	244	244	0.012085	-0.0023912	By matching	By MS/MS	By matching	3.7	3.7	3.7	7514100	3347400	3167200	999460	0	8696600	0	0	0	0	0
Unspecific	c262903/1/2198|m.638	c262903/1/2198|m.638	c262903/1/2198|m.638	P2C52_ARATH^P2C52_ARATH^Q:1089-1742,H:254-465^76.364%ID^E:2.47e-168^RecName: Full=Probable protein phosphatase 2C 52;^Eukaryota; Viridiplantae; Streptophyta; Embryophyta; Tracheophyta; Spermatophyta; Magnoliophyta; eudicotyledons; Gunneridae; Pentapetalae; rosids; malvids; Brassicales; Brassicaceae; Camelineae; Arabidopsis`P2C52_ARATH^P2C52_ARATH^Q:338-973,H:1-214^63.551%ID^E:2.47e-168^RecName: F…	1	1	1		1	1	1	1	1	0	0	1	0	0	1	0	0	6	6	6	17.088	151	151	0.012048	-0.0023912	By MS/MS			6	0	0	982960	982960	0	0	2340400	0	0	0	0	0	0
Unspecific	c263049/1/2046|m.23836	c263049/1/2046|m.23836	c263049/1/2046|m.23836	Y5707_ARATH^Y5707_ARATH^Q:64-416,H:63-399^51.558%ID^E:6.06e-118^RecName: Full=Probable receptor-like protein kinase At5g47070;^Eukaryota; Viridiplantae; Streptophyta; Embryophyta; Tracheophyta; Spermatophyta; Magnoliophyta; eudicotyledons; Gunneridae; Pentapetalae; rosids; malvids; Brassicales; Brassicaceae; Camelineae; Arabidopsis	1	1	1		1	1	1	1	1	1	0	1	1	0	1	1	0	2	2	2	52.099	458	458	0.012012	-0.0023912	By matching	By MS/MS		2	2	0	15082000	2312400	12770000	0	0	25332000	0	0	0	0	0
Unspecific	c26326/6/1871|m.16466	c26326/6/1871|m.16466	c26326/6/1871|m.16466	TCPB_ARATH^TCPB_ARATH^Q:1-527,H:1-527^87.856%ID^E:0^RecName: Full=T-complex protein 1 subunit beta {ECO:0000303|PubMed:11599560};^Eukaryota; Viridiplantae; Streptophyta; Embryophyta; Tracheophyta; Spermatophyta; Magnoliophyta; eudicotyledons; Gunneridae; Pentapetalae; rosids; malvids; Brassicales; Brassicaceae; Camelineae; Arabidopsis	1	1	1		1	1	1	1	1	0	1	1	0	1	1	0	1	1.7	1.7	1.7	57.185	527	527	0.011976	-0.0023912	By MS/MS		By matching	1.7	0	1.7	3505700	3063200	0	442520	0	0	1119100	0	0	0	0
Unspecific	c263305/1/2034|m.1111	c263305/1/2034|m.1111	c263305/1/2034|m.1111	.	1	1	1		1	1	1	1	1	0	0	1	0	0	1	0	0	7.9	7.9	7.9	13.279	114	114	0.01194	-0.0023912	By MS/MS			7.9	0	0	340760	340760	0	0	853610	0	0	0	0	0	0
Unspecific	c263526/1/1324|m.8043	c263526/1/1324|m.8043	c263526/1/1324|m.8043	FH20_ARATH^FH20_ARATH^Q:2-172,H:1436-1606^74.854%ID^E:1.43e-78^RecName: Full=Formin-like protein 20;^Eukaryota; Viridiplantae; Streptophyta; Embryophyta; Tracheophyta; Spermatophyta; Magnoliophyta; eudicotyledons; Gunneridae; Pentapetalae; rosids; malvids; Brassicales; Brassicaceae; Camelineae; Arabidopsis	1	1	1		1	1	1	1	1	1	0	1	1	0	1	1	0	5	5	5	19.595	179	179	0.011905	-0.0023912	By MS/MS	By matching		5	5	0	4170100	3794900	375150	0	7811900	0	0	0	0	0	0
Unspecific	c26587/1/1533|m.16682	c26587/1/1533|m.16682	c26587/1/1533|m.16682	C3H30_ARATH^C3H30_ARATH^Q:1-266,H:327-575^59.191%ID^E:2.62e-79^RecName: Full=Zinc finger CCCH domain-containing protein 30;^Eukaryota; Viridiplantae; Streptophyta; Embryophyta; Tracheophyta; Spermatophyta; Magnoliophyta; eudicotyledons; Gunneridae; Pentapetalae; rosids; malvids; Brassicales; Brassicaceae; Camelineae; Arabidopsis	1	1	1		1	1	1	1	1	0	0	1	0	0	1	0	0	2.8	2.8	2.8	34.857	320	320	0.011869	-0.0023912	By MS/MS			2.8	0	0	375660	375660	0	0	1599200	0	0	0	0	0	0
Unspecific	c26613/1/1624|m.16699	c26613/1/1624|m.16699	c26613/1/1624|m.16699	.	1	1	1		1	1	1	1	1	0	1	1	0	1	1	0	1	7.9	7.9	7.9	12.936	114	114	0.021053	-0.0023912	By matching		By MS/MS	7.9	0	7.9	3257300	356190	0	2901100	0	0	4379200	0	0	0	0
Unspecific	c27771/2/1568|m.17570	c27771/2/1568|m.17570	c27771/2/1568|m.17570	ATXR5_RICCO^ATXR5_RICCO^Q:86-418,H:42-374^77.177%ID^E:0^RecName: Full=Probable Histone-lysine N-methyltransferase ATXR5;^Eukaryota; Viridiplantae; Streptophyta; Embryophyta; Tracheophyta; Spermatophyta; Magnoliophyta; eudicotyledons; Gunneridae; Pentapetalae; rosids; fabids; Malpighiales; Euphorbiaceae; Acalyphoideae; Acalypheae; Ricinus	1	1	1		1	1	1	1	1	0	1	1	0	1	1	0	1	2.2	2.2	2.2	47.609	418	418	0.011834	-0.0023912	By MS/MS		By matching	2.2	0	2.2	11387000	4414200	0	6973200	0	0	10572000	0	0	0	0
Unspecific	c27938/1/4664|m.17703	c27938/1/4664|m.17703	c27938/1/4664|m.17703	HPPD_DAUCA^HPPD_DAUCA^Q:3250-2939,H:278-378^49.038%ID^E:4.51e-20^RecName: Full=4-hydroxyphenylpyruvate dioxygenase;^Eukaryota; Viridiplantae; Streptophyta; Embryophyta; Tracheophyta; Spermatophyta; Magnoliophyta; eudicotyledons; Gunneridae; Pentapetalae; asterids; campanulids; Apiales; Apiaceae; Apioideae; Scandiceae; Daucinae; Daucus`HPPD_DAUCA^HPPD_DAUCA^Q:2963-2802,H:370-423^47.273%ID^E:4.51e-…	1	1	1		1	1	1	1	0	1	0	0	1	0	0	1	0	5.4	5.4	5.4	18.862	166	166	0.011799	-0.0023912		By MS/MS		0	5.4	0	201220	0	201220	0	0	847270	0	0	0	0	0
Unspecific	c2808/5/1406|m.2981	c2808/5/1406|m.2981	c2808/5/1406|m.2981	Y4885_ARATH^Y4885_ARATH^Q:78-343,H:130-396^34.572%ID^E:4.67e-32^RecName: Full=Probable LRR receptor-like serine/threonine-protein kinase At4g08850;^Eukaryota; Viridiplantae; Streptophyta; Embryophyta; Tracheophyta; Spermatophyta; Magnoliophyta; eudicotyledons; Gunneridae; Pentapetalae; rosids; malvids; Brassicales; Brassicaceae; Camelineae; Arabidopsis`Y4885_ARATH^Y4885_ARATH^Q:64-369,H:380-708^2…	1	1	1		1	1	1	1	1	0	1	1	0	1	1	0	1	2.4	2.4	2.4	40.091	373	373	0.011765	-0.0023912	By MS/MS		By MS/MS	2.4	0	2.4	10911000	6593800	0	4317400	0	0	10222000	0	0	0	0
Unspecific	c28161/3/1159|m.17909	c28161/3/1159|m.17909	c28161/3/1159|m.17909	RL7A_ORYSJ^RL7A_ORYSJ^Q:1-85,H:1-84^81.176%ID^E:2.03e-39^RecName: Full=60S ribosomal protein L7a;^Eukaryota; Viridiplantae; Streptophyta; Embryophyta; Tracheophyta; Spermatophyta; Magnoliophyta; Liliopsida; Poales; Poaceae; BEP clade; Ehrhartoideae; Oryzeae; Oryza	1	1	1		1	1	1	1	1	0	0	1	0	0	1	0	0	8.3	8.3	8.3	12.596	108	108	0.01173	-0.0023912	By MS/MS			8.3	0	0	185030	185030	0	0	463510	0	0	0	0	0	0
Unspecific	c28512/1/1569|m.18153	c28512/1/1569|m.18153	c28512/1/1569|m.18153	.	1	1	1		1	1	1	1	1	0	0	1	0	0	1	0	0	2	2	2	50.132	448	448	0.011696	-0.0023912	By MS/MS			2	0	0	1281900	1281900	0	0	3211300	0	0	0	0	0	0
Unspecific	c28938/1/2069|m.18476	c28938/1/2069|m.18476	c28938/1/2069|m.18476	PRH_ARATH^PRH_ARATH^Q:263-592,H:125-234^74.545%ID^E:6.66e-52^RecName: Full=Pathogenesis-related homeodomain protein;^Eukaryota; Viridiplantae; Streptophyta; Embryophyta; Tracheophyta; Spermatophyta; Magnoliophyta; eudicotyledons; Gunneridae; Pentapetalae; rosids; malvids; Brassicales; Brassicaceae; Camelineae; Arabidopsis`PRH_ARATH^PRH_ARATH^Q:636-779,H:250-297^50%ID^E:6.66e-52^RecName: Full=Path…	1	1	1		1	1	1	1	1	0	0	1	0	0	1	0	0	8.2	8.2	8.2	12.522	110	110	0.011628	-0.0023912	By MS/MS			8.2	0	0	1366100	1366100	0	0	3422100	0	0	0	0	0	0
Unspecific	c2906/2/1638|m.3058	c2906/2/1638|m.3058	c2906/2/1638|m.3058	MSH2_ARATH^MSH2_ARATH^Q:27-546,H:1-520^68.077%ID^E:0^RecName: Full=DNA mismatch repair protein MSH2;^Eukaryota; Viridiplantae; Streptophyta; Embryophyta; Tracheophyta; Spermatophyta; Magnoliophyta; eudicotyledons; Gunneridae; Pentapetalae; rosids; malvids; Brassicales; Brassicaceae; Camelineae; Arabidopsis	1	1	1		1	1	1	1	1	0	0	1	0	0	1	0	0	1.6	1.6	1.6	61.576	546	546	0.011594	-0.0023912	By MS/MS			1.6	0	0	111250	111250	0	0	278690	0	0	0	0	0	0
Unspecific	c296320/2/1669|m.92969	c296320/2/1669|m.92969	c296320/2/1669|m.92969	HFB2B_ARATH^HFB2B_ARATH^Q:100-386,H:51-343^57.285%ID^E:7.53e-92^RecName: Full=Heat stress transcription factor B-2b;^Eukaryota; Viridiplantae; Streptophyta; Embryophyta; Tracheophyta; Spermatophyta; Magnoliophyta; eudicotyledons; Gunneridae; Pentapetalae; rosids; malvids; Brassicales; Brassicaceae; Camelineae; Arabidopsis	1	1	1		1	1	1	1	1	1	1	1	1	1	1	1	1	2.3	2.3	2.3	43.847	396	396	0.011527	-0.0023912	By MS/MS	By matching	By matching	2.3	2.3	2.3	77962000	59195000	8936200	9830600	113150000	0	0	0	0	0	0
Unspecific	c296542/1/1744|m.22913	c296542/1/1744|m.22913	c296542/1/1744|m.22913	.	1	1	1		1	1	1	1	1	0	0	1	0	0	1	0	0	3.9	3.9	3.9	24.26	231	231	0.011494	-0.0023912	By MS/MS			3.9	0	0	4672300	4672300	0	0	11273000	0	0	0	0	0	0
Unspecific	c29666/1/1548|m.19068	c29666/1/1548|m.19068	c29666/1/1548|m.19068	NRPB1_ARATH^NRPB1_ARATH^Q:1-102,H:501-597^79.412%ID^E:7.92e-49^RecName: Full=DNA-directed RNA polymerase II subunit 1;^Eukaryota; Viridiplantae; Streptophyta; Embryophyta; Tracheophyta; Spermatophyta; Magnoliophyta; eudicotyledons; Gunneridae; Pentapetalae; rosids; malvids; Brassicales; Brassicaceae; Camelineae; Arabidopsis	1	1	1		1	1	1	1	1	1	1	1	1	1	1	1	1	8	8	8	12.925	112	112	0.011461	-0.0023912	By matching	By matching	By MS/MS	8	8	8	3400200	2413600	712370	274260	0	0	1313500	0	0	0	0
Unspecific	c297516/1/1424|m.85968	c297516/1/1424|m.85968	c297516/1/1424|m.85968	CDSP_ARATH^CDSP_ARATH^Q:28-222,H:1-197^33.659%ID^E:1.11e-12^RecName: Full=Thioredoxin-like protein CDSP32, chloroplastic;^Eukaryota; Viridiplantae; Streptophyta; Embryophyta; Tracheophyta; Spermatophyta; Magnoliophyta; eudicotyledons; Gunneridae; Pentapetalae; rosids; malvids; Brassicales; Brassicaceae; Camelineae; Arabidopsis	1	1	1		1	1	1	1	1	1	1	1	1	1	1	1	1	4	4	4	25.231	225	225	0.011429	-0.0023912	By MS/MS	By matching	By matching	4	4	4	18454000	12752000	2577600	3125000	24164000	0	0	0	0	0	0
Unspecific	c29864/1/1737|m.19237	c29864/1/1737|m.19237	c29864/1/1737|m.19237	Y1280_ARATH^Y1280_ARATH^Q:2-262,H:104-351^73.563%ID^E:4.74e-141^RecName: Full=Putative methyltransferase At1g22800;^Eukaryota; Viridiplantae; Streptophyta; Embryophyta; Tracheophyta; Spermatophyta; Magnoliophyta; eudicotyledons; Gunneridae; Pentapetalae; rosids; malvids; Brassicales; Brassicaceae; Camelineae; Arabidopsis	1	1	1		1	1	1	1	0	1	0	0	1	0	0	1	0	3.4	3.4	3.4	29.017	264	264	0.011396	-0.0023912		By MS/MS		0	3.4	0	1677800	0	1677800	0	0	7064600	0	0	0	0	0
Unspecific	c299162/1/1731|m.90272	c299162/1/1731|m.90272	c299162/1/1731|m.90272	RX24L_ARATH^RX24L_ARATH^Q:1-197,H:355-545^35.025%ID^E:6.09e-36^RecName: Full=Probable disease resistance protein RXW24L;^Eukaryota; Viridiplantae; Streptophyta; Embryophyta; Tracheophyta; Spermatophyta; Magnoliophyta; eudicotyledons; Gunneridae; Pentapetalae; rosids; malvids; Brassicales; Brassicaceae; Camelineae; Arabidopsis	1	1	1		1	1	1	1	1	0	0	1	0	0	1	0	0	4.4	4.4	4.4	23.404	204	204	0.011364	-0.0023912	By MS/MS			4.4	0	0	1619100	1619100	0	0	4056000	0	0	0	0	0	0
Unspecific	c302601/1/1866|m.27742	c302601/1/1866|m.27742	c302601/1/1866|m.27742	DIV_ANTMA^DIV_ANTMA^Q:26-171,H:147-296^54.194%ID^E:6.69e-40^RecName: Full=Transcription factor DIVARICATA;^Eukaryota; Viridiplantae; Streptophyta; Embryophyta; Tracheophyta; Spermatophyta; Magnoliophyta; eudicotyledons; Gunneridae; Pentapetalae; asterids; lamiids; Lamiales; Plantaginaceae; Antirrhineae; Antirrhinum	1	1	1		1	1	1	1	0	1	1	0	1	1	0	1	1	5	5	5	19.852	179	179	0.011331	-0.0023912		By MS/MS	By matching	0	5	5	13264000	0	5713900	7550100	0	0	22101000	0	0	0	0
Unspecific	c304085/1/2082|m.28537	c304085/1/2082|m.28537	c304085/1/2082|m.28537	RFWD3_MOUSE^RFWD3_MOUSE^Q:80-410,H:255-572^30.383%ID^E:1.32e-30^RecName: Full=E3 ubiquitin-protein ligase RFWD3;^Eukaryota; Metazoa; Chordata; Craniata; Vertebrata; Euteleostomi; Mammalia; Eutheria; Euarchontoglires; Glires; Rodentia; Sciurognathi; Muroidea; Muridae; Murinae; Mus; Mus	1	1	1		1	1	1	1	1	1	0	1	1	0	1	1	0	1.4	1.4	1.4	69.082	622	622	0.011299	-0.0023912	By MS/MS	By matching		1.4	1.4	0	6993900	5145900	1848000	0	9151400	0	0	0	0	0	0
Unspecific	c304339/1/1385|m.28638	c304339/1/1385|m.28638	c304339/1/1385|m.28638	SYP22_ARATH^SYP22_ARATH^Q:307-552,H:13-95^67.47%ID^E:4.86e-26^RecName: Full=Syntaxin-22;^Eukaryota; Viridiplantae; Streptophyta; Embryophyta; Tracheophyta; Spermatophyta; Magnoliophyta; eudicotyledons; Gunneridae; Pentapetalae; rosids; malvids; Brassicales; Brassicaceae; Camelineae; Arabidopsis`SYP22_ARATH^SYP22_ARATH^Q:854-1045,H:95-154^70.312%ID^E:3.68e-18^RecName: Full=Syntaxin-22;^Eukaryota; …	1	1	1		1	1	1	1	0	0	1	0	0	1	0	0	1	8	8	8	12.96	112	112	0.011268	-0.0023912			By MS/MS	0	0	8	640890	0	0	640890	0	0	1517300	0	0	0	0
Unspecific	c304434/1/1715|m.28683	c304434/1/1715|m.28683	c304434/1/1715|m.28683	ANR44_MOUSE^ANR44_MOUSE^Q:32-487,H:144-287^30.519%ID^E:3.17e-10^RecName: Full=Serine/threonine-protein phosphatase 6 regulatory ankyrin repeat subunit B;^Eukaryota; Metazoa; Chordata; Craniata; Vertebrata; Euteleostomi; Mammalia; Eutheria; Euarchontoglires; Glires; Rodentia; Sciurognathi; Muroidea; Muridae; Murinae; Mus; Mus`ANR44_MOUSE^ANR44_MOUSE^Q:489-914,H:318-439^28.169%ID^E:3.17e-10^RecName…	1	1	1		1	1	1	1	1	0	0	1	0	0	1	0	0	3.1	3.1	3.1	31.138	293	293	0.011236	-0.0023912	By MS/MS			3.1	0	0	27882	27882	0	0	69846	0	0	0	0	0	0
Unspecific	c305234/1/1914|m.100764	c305234/1/1914|m.100764	c305234/1/1914|m.100764	TBB2_ELEIN^TBB2_ELEIN^Q:1-125,H:316-440^60.8%ID^E:1.48e-40^RecName: Full=Tubulin beta-2 chain;^Eukaryota; Viridiplantae; Streptophyta; Embryophyta; Tracheophyta; Spermatophyta; Magnoliophyta; Liliopsida; Poales; Poaceae; PACMAD clade; Chloridoideae; Cynodonteae; Eleusininae; Eleusine	1	1	1		1	1	1	1	1	0	0	1	0	0	1	0	0	7.1	7.1	7.1	15.28	127	127	0.011204	-0.0023912	By MS/MS			7.1	0	0	63992	63992	0	0	160300	0	0	0	0	0	0
Unspecific	c30538/1/1105|m.19755	c30538/1/1105|m.19755	c30538/1/1105|m.19755	.	1	1	1		1	1	1	1	1	0	0	1	0	0	1	0	0	4.6	4.6	4.6	22.361	195	195	0.011173	-0.0023912	By MS/MS			4.6	0	0	2055000	2055000	0	0	5147900	0	0	0	0	0	0
Unspecific	c306359/1/2717|m.29565	c306359/1/2717|m.29565	c306359/1/2717|m.29565	ENPL_HORVU^ENPL_HORVU^Q:52-199,H:48-191^50.667%ID^E:9.88e-37^RecName: Full=Endoplasmin homolog;^Eukaryota; Viridiplantae; Streptophyta; Embryophyta; Tracheophyta; Spermatophyta; Magnoliophyta; Liliopsida; Poales; Poaceae; BEP clade; Pooideae; Triticeae; Hordeum	1	1	1		1	1	1	1	0	1	0	0	1	0	0	1	0	4.5	4.5	4.5	22.014	199	199	0.011142	-0.0023912		By MS/MS		0	4.5	0	5442600	0	5442600	0	0	22917000	0	0	0	0	0
Unspecific	c307264/1/2218|m.29981	c307264/1/2218|m.29981	c307264/1/2218|m.29981	.	1	1	1		1	1	1	1	1	0	0	1	0	0	1	0	0	5.7	5.7	5.7	18.146	159	159	0.011111	-0.0023912	By MS/MS			5.7	0	0	352750	352750	0	0	883640	0	0	0	0	0	0
Unspecific	c307309/1/1547|m.30008	c307309/1/1547|m.30008	c307309/1/1547|m.30008	.	1	1	1		1	1	1	1	1	1	0	1	1	0	1	1	0	6.8	6.8	6.8	14.32	132	132	0.01108	-0.0023912	By MS/MS	By matching		6.8	6.8	0	6471400	5640900	830590	0	10613000	0	0	0	0	0	0
Unspecific	c3282/1/1663|m.3421	c3282/1/1663|m.3421	c3282/1/1663|m.3421	Y1634_ARATH^Y1634_ARATH^Q:1-458,H:199-661^64.731%ID^E:0^RecName: Full=Probable LRR receptor-like serine/threonine-protein kinase At1g63430;^Eukaryota; Viridiplantae; Streptophyta; Embryophyta; Tracheophyta; Spermatophyta; Magnoliophyta; eudicotyledons; Gunneridae; Pentapetalae; rosids; malvids; Brassicales; Brassicaceae; Camelineae; Arabidopsis	1	1	1		1	1	1	1	0	0	1	0	0	1	0	0	1	1.9	1.9	1.9	51.815	464	464	0.01105	-0.0023912			By MS/MS	0	0	1.9	135670	0	0	135670	0	0	321210	0	0	0	0
Unspecific	c33266/2/1704|m.21870	c33266/2/1704|m.21870	c33266/2/1704|m.21870	ATL13_ARATH^ATL13_ARATH^Q:1-493,H:8-469^47.977%ID^E:9.39e-99^RecName: Full=RING-H2 finger protein ATL13;^Eukaryota; Viridiplantae; Streptophyta; Embryophyta; Tracheophyta; Spermatophyta; Magnoliophyta; eudicotyledons; Gunneridae; Pentapetalae; rosids; malvids; Brassicales; Brassicaceae; Camelineae; Arabidopsis	1	1	1		1	1	1	1	1	1	0	1	1	0	1	1	0	1.8	1.8	1.8	54.347	495	495	0.010989	-0.0023912	By MS/MS	By matching		1.8	1.8	0	5155500	4961200	194360	0	5199500	0	0	0	0	0	0
Unspecific	c34298/1/1480|m.22808	c34298/1/1480|m.22808	c34298/1/1480|m.22808	.	1	1	1		1	1	1	1	0	1	0	0	1	0	0	1	0	5.4	5.4	5.4	19.441	168	168	0.010959	-0.0023912		By MS/MS		0	5.4	0	261190	0	261190	0	0	1099800	0	0	0	0	0
Unspecific	c34531/1/2050|m.23054	c34531/1/2050|m.23054	c34531/1/2050|m.23054	Y1686_ARATH^Y1686_ARATH^Q:7-92,H:204-288^38.636%ID^E:1.72e-06^RecName: Full=Uncharacterized membrane protein At1g16860;^Eukaryota; Viridiplantae; Streptophyta; Embryophyta; Tracheophyta; Spermatophyta; Magnoliophyta; eudicotyledons; Gunneridae; Pentapetalae; rosids; malvids; Brassicales; Brassicaceae; Camelineae; Arabidopsis	1	1	1		1	1	1	1	0	1	0	0	1	0	0	1	0	5.9	5.9	5.9	17.561	152	152	0.010929	-0.0023912		By MS/MS		0	5.9	0	413540	0	413540	0	0	1741300	0	0	0	0	0
Unspecific	c34921/1/1519|m.23402	c34921/1/1519|m.23402	c34921/1/1519|m.23402	GIT7_SCHPO^GIT7_SCHPO^Q:1092-1247,H:306-358^45.283%ID^E:5.86e-08^RecName: Full=Glucose-insensitive transcription protein 7;^Eukaryota; Fungi; Dikarya; Ascomycota; Taphrinomycotina; Schizosaccharomycetes; Schizosaccharomycetales; Schizosaccharomycetaceae; Schizosaccharomyces`GIT7_SCHPO^GIT7_SCHPO^Q:1249-1311,H:359-379^61.905%ID^E:5.86e-08^RecName: Full=Glucose-insensitive transcription protein 7;^…	1	1	1		1	1	1	1	1	0	1	1	0	1	1	0	1	6.9	6.9	6.9	15.011	130	130	0.010899	-0.0023912	By MS/MS		By matching	6.9	0	6.9	27431000	20389000	0	7041900	44036000	0	0	0	0	0	0
Unspecific	c35280/1/1973|m.23738	c35280/1/1973|m.23738	c35280/1/1973|m.23738	ALDH_LINUS^ALDH_LINUS^Q:2-138,H:97-233^43.262%ID^E:1.27e-23^RecName: Full=Probable aldehyde dehydrogenase;^Eukaryota; Viridiplantae; Streptophyta; Embryophyta; Tracheophyta; Spermatophyta; Magnoliophyta; eudicotyledons; Gunneridae; Pentapetalae; rosids; fabids; Malpighiales; Linaceae; Linum	1	1	1		1	1	1	1	1	0	0	1	0	0	1	0	0	6.5	6.5	6.5	15.742	139	139	0.01087	-0.0023912	By MS/MS			6.5	0	0	742730	742730	0	0	1860600	0	0	0	0	0	0
Unspecific	c35564/1/1706|m.24021	c35564/1/1706|m.24021	c35564/1/1706|m.24021	GUN15_ORYSJ^GUN15_ORYSJ^Q:1-49,H:101-149^81.633%ID^E:1.3e-19^RecName: Full=Endoglucanase 15;^Eukaryota; Viridiplantae; Streptophyta; Embryophyta; Tracheophyta; Spermatophyta; Magnoliophyta; Liliopsida; Poales; Poaceae; BEP clade; Ehrhartoideae; Oryzeae; Oryza`GUN15_ORYSJ^GUN15_ORYSJ^Q:115-152,H:468-505^81.579%ID^E:9.3e-12^RecName: Full=Endoglucanase 15;^Eukaryota; Viridiplantae; Streptophyta; Emb…	1	1	1		1	1	1	1	1	0	0	1	0	0	1	0	0	5.9	5.9	5.9	17.073	152	152	0.01084	-0.0023912	By MS/MS			5.9	0	0	258200	258200	0	0	646810	0	0	0	0	0	0
Unspecific	c35792/1/1785|m.24260	c35792/1/1785|m.24260	c35792/1/1785|m.24260	.	1	1	1		1	1	1	1	1	0	0	1	0	0	1	0	0	8.8	8.8	8.8	11.081	102	102	0.010811	-0.0023912	By MS/MS			8.8	0	0	4586700	4586700	0	0	10626000	0	0	0	0	0	0
Unspecific	c35896/1/1916|m.24371	c35896/1/1916|m.24371	c35896/1/1916|m.24371	.	1	1	1		1	1	1	1	0	1	0	0	1	0	0	1	0	3.4	3.4	3.4	28.732	262	262	0.010782	-0.0023912		By MS/MS		0	3.4	0	2350100	0	2350100	0	0	9895700	0	0	0	0	0
Unspecific	c36083/1/1454|m.24543	c36083/1/1454|m.24543	c36083/1/1454|m.24543	MNN9_CANAL^MNN9_CANAL^Q:1-126,H:243-368^61.905%ID^E:7e-51^RecName: Full=Mannan polymerase complex subunit MNN9;^Eukaryota; Fungi; Dikarya; Ascomycota; Saccharomycotina; Saccharomycetes; Saccharomycetales; Debaryomycetaceae; Candida/Lodderomyces clade; Candida	1	1	1		1	1	1	1	0	1	0	0	1	0	0	1	0	7.1	7.1	7.1	14.125	126	126	0.010753	-0.0023912		By MS/MS		0	7.1	0	538230	0	538230	0	0	785490	0	0	0	0	0
Unspecific	c36209/1/1800|m.24648	c36209/1/1800|m.24648	c36209/1/1800|m.24648	ATPB_SCHPO^ATPB_SCHPO^Q:1-53,H:423-475^94.34%ID^E:1.7e-25^RecName: Full=ATP synthase subunit beta, mitochondrial;^Eukaryota; Fungi; Dikarya; Ascomycota; Taphrinomycotina; Schizosaccharomycetes; Schizosaccharomycetales; Schizosaccharomycetaceae; Schizosaccharomyces	1	1	1		1	1	1	1	1	1	1	1	1	1	1	1	1	8.3	8.3	8.3	12.699	109	109	0.010724	-0.0023912	By matching	By MS/MS	By matching	8.3	8.3	8.3	192040000	115050000	19980000	57005000	0	0	154450000	0	0	0	0
Unspecific	c36672/1/1436|m.25103	c36672/1/1436|m.25103	c36672/1/1436|m.25103	MFD_SYNY3^MFD_SYNY3^Q:62-182,H:519-629^37.19%ID^E:5.75e-12^RecName: Full=Transcription-repair-coupling factor {ECO:0000255|HAMAP-Rule:MF_00969};^Bacteria; Cyanobacteria; Oscillatoriophycideae; Chroococcales; Synechocystis	1	1	1		1	1	1	1	1	1	1	1	1	1	1	1	1	4.2	4.2	4.2	24.523	212	212	0.010695	-0.0023912	By MS/MS	By matching	By matching	4.2	4.2	4.2	51221000	29497000	11350000	10374000	47051000	0	0	0	0	0	0
Unspecific	c36859/1/1237|m.25287	c36859/1/1237|m.25287	c36859/1/1237|m.25287	PHL1_ARATH^PHL1_ARATH^Q:39-188,H:216-365^54.487%ID^E:2.66e-44^RecName: Full=Protein PHR1-LIKE 1;^Eukaryota; Viridiplantae; Streptophyta; Embryophyta; Tracheophyta; Spermatophyta; Magnoliophyta; eudicotyledons; Gunneridae; Pentapetalae; rosids; malvids; Brassicales; Brassicaceae; Camelineae; Arabidopsis	1	1	1		1	1	1	1	1	0	0	1	0	0	1	0	0	3.1	3.1	3.1	33.291	295	295	0.010667	-0.0023912	By MS/MS			3.1	0	0	8212100	8212100	0	0	14095000	0	0	0	0	0	0
Unspecific	c37608/1/1513|m.26010	c37608/1/1513|m.26010	c37608/1/1513|m.26010	.	1	1	1		1	1	1	1	1	1	0	1	1	0	1	1	0	4.9	4.9	4.9	20.516	182	182	0.010638	-0.0023912	By matching	By MS/MS		4.9	4.9	0	6473400	5730200	743120	0	10910000	0	0	0	0	0	0
Unspecific	c37826/1/1864|m.26216	c37826/1/1864|m.26216	c37826/1/1864|m.26216	NFS1_ARATH^NFS1_ARATH^Q:889-1605,H:211-450^70.325%ID^E:3.86e-118^RecName: Full=Cysteine desulfurase 1, mitochondrial;^Eukaryota; Viridiplantae; Streptophyta; Embryophyta; Tracheophyta; Spermatophyta; Magnoliophyta; eudicotyledons; Gunneridae; Pentapetalae; rosids; malvids; Brassicales; Brassicaceae; Camelineae; Arabidopsis`NFS1_ARATH^NFS1_ARATH^Q:275-889,H:41-210^37.9%ID^E:3.86e-118^RecName: Full…	1	1	1		1	1	1	1	1	1	1	1	1	1	1	1	1	6.2	6.2	6.2	16.4	145	145	0.01061	-0.0023912	By matching	By MS/MS	By matching	6.2	6.2	6.2	8407800	5448600	868680	2090500	8755100	0	0	0	0	0	0
Unspecific	c37886/1/1790|m.26279	c37886/1/1790|m.26279	c37886/1/1790|m.26279	ZAT4_ARATH^ZAT4_ARATH^Q:1303-1557,H:172-264^35.484%ID^E:6.28e-08^RecName: Full=Zinc finger protein ZAT4;^Eukaryota; Viridiplantae; Streptophyta; Embryophyta; Tracheophyta; Spermatophyta; Magnoliophyta; eudicotyledons; Gunneridae; Pentapetalae; rosids; malvids; Brassicales; Brassicaceae; Camelineae; Arabidopsis	1	1	1		1	1	1	1	1	0	0	1	0	0	1	0	0	2.4	2.4	2.4	40.54	369	369	0.010582	-0.0023912	By MS/MS			2.4	0	0	5721900	5721900	0	0	24358000	0	0	0	0	0	0
Unspecific	c38236/1/1883|m.26632	c38236/1/1883|m.26632	c38236/1/1883|m.26632	.	1	1	1		1	1	1	1	0	1	0	0	1	0	0	1	0	8.1	8.1	8.1	12.134	111	111	0.010554	-0.0023912		By MS/MS		0	8.1	0	3462100	0	3462100	0	0	14578000	0	0	0	0	0
Unspecific	c4340/1/1640|m.4379	c4340/1/1640|m.4379	c4340/1/1640|m.4379	.	1	1	1		1	1	1	1	1	0	0	1	0	0	1	0	0	7.2	7.2	7.2	13.825	125	125	0.010526	-0.0023912	By MS/MS			7.2	0	0	455600	455600	0	0	1141300	0	0	0	0	0	0
Unspecific	c4780/1/1877|m.4747	c4780/1/1877|m.4747	c4780/1/1877|m.4747	PGLR4_ARATH^PGLR4_ARATH^Q:102-182,H:73-152^45.679%ID^E:7.94e-17^RecName: Full=Polygalacturonase At1g48100;^Eukaryota; Viridiplantae; Streptophyta; Embryophyta; Tracheophyta; Spermatophyta; Magnoliophyta; eudicotyledons; Gunneridae; Pentapetalae; rosids; malvids; Brassicales; Brassicaceae; Camelineae; Arabidopsis	1	1	1		1	1	1	1	1	0	0	1	0	0	1	0	0	4.7	4.7	4.7	20.812	190	190	0.010499	-0.0023912	By MS/MS			4.7	0	0	11615000	11615000	0	0	29095000	0	0	0	0	0	0
Unspecific	c5258/1/1559|m.5158	c5258/1/1559|m.5158	c5258/1/1559|m.5158	SGT1B_ARATH^SGT1B_ARATH^Q:33-395,H:1-358^64.384%ID^E:1.13e-159^RecName: Full=Protein SGT1 homolog B;^Eukaryota; Viridiplantae; Streptophyta; Embryophyta; Tracheophyta; Spermatophyta; Magnoliophyta; eudicotyledons; Gunneridae; Pentapetalae; rosids; malvids; Brassicales; Brassicaceae; Camelineae; Arabidopsis	1	1	1		1	1	1	1	1	0	0	1	0	0	1	0	0	2.3	2.3	2.3	43.791	395	395	0.010444	-0.0023912	By MS/MS			2.3	0	0	1001000	1001000	0	0	2507600	0	0	0	0	0	0
Unspecific	c5283/4/2037|m.5187	c5283/4/2037|m.5187	c5283/4/2037|m.5187	ACR8_ARATH^ACR8_ARATH^Q:293-1615,H:1-441^64.334%ID^E:0^RecName: Full=ACT domain-containing protein ACR8 {ECO:0000305};^Eukaryota; Viridiplantae; Streptophyta; Embryophyta; Tracheophyta; Spermatophyta; Magnoliophyta; eudicotyledons; Gunneridae; Pentapetalae; rosids; malvids; Brassicales; Brassicaceae; Camelineae; Arabidopsis	1	1	1		1	1	1	1	0	0	1	0	0	1	0	0	1	5.7	5.7	5.7	17.494	157	157	0.010417	-0.0023912			By MS/MS	0	0	5.7	13577000	0	0	13577000	0	0	20584000	0	0	0	0
Unspecific	c61217/3/1321|m.31159	c61217/3/1321|m.31159	c61217/3/1321|m.31159	RBM42_BOVIN^RBM42_BOVIN^Q:114-215,H:329-430^74.51%ID^E:1.49e-50^RecName: Full=RNA-binding protein 42;^Eukaryota; Metazoa; Chordata; Craniata; Vertebrata; Euteleostomi; Mammalia; Eutheria; Laurasiatheria; Cetartiodactyla; Ruminantia; Pecora; Bovidae; Bovinae; Bos	1	1	1		1	1	1	1	1	0	0	1	0	0	1	0	0	3.7	3.7	3.7	26.758	242	242	0.01039	-0.0023912	By MS/MS			3.7	0	0	2065100	2065100	0	0	5173200	0	0	0	0	0	0
Unspecific	c61230/3/1389|m.31168	c61230/3/1389|m.31168	c61230/3/1389|m.31168	P2C58_ARATH^P2C58_ARATH^Q:1-143,H:1-143^67.832%ID^E:6.17e-67^RecName: Full=Probable protein phosphatase 2C 58;^Eukaryota; Viridiplantae; Streptophyta; Embryophyta; Tracheophyta; Spermatophyta; Magnoliophyta; eudicotyledons; Gunneridae; Pentapetalae; rosids; malvids; Brassicales; Brassicaceae; Camelineae; Arabidopsis	1	1	1		1	1	1	1	1	0	0	1	0	0	1	0	0	6	6	6	17.054	151	151	0.010363	-0.0023912	By MS/MS			6	0	0	368010	368010	0	0	921890	0	0	0	0	0	0
Unspecific	c61646/1/2146|m.31694	c61646/1/2146|m.31694	c61646/1/2146|m.31694	C3H19_ARATH^C3H19_ARATH^Q:1-347,H:1128-1466^36.828%ID^E:2.82e-40^RecName: Full=Zinc finger CCCH domain-containing protein 19;^Eukaryota; Viridiplantae; Streptophyta; Embryophyta; Tracheophyta; Spermatophyta; Magnoliophyta; eudicotyledons; Gunneridae; Pentapetalae; rosids; malvids; Brassicales; Brassicaceae; Camelineae; Arabidopsis	1	1	1		1	1	1	1	1	1	1	1	1	1	1	1	1	1.8	1.8	1.8	53.606	503	503	0.010336	-0.0023912	By matching	By MS/MS	By matching	1.8	1.8	1.8	3801100	849030	1404400	1547700	0	0	3664100	0	0	0	0
Unspecific	c6270/1/2279|m.6073	c6270/1/2279|m.6073	c6270/1/2279|m.6073	.	1	1	1		1	1	1	1	1	1	1	1	1	1	1	1	1	6.2	6.2	6.2	15.563	144	144	0.010309	-0.0023912	By MS/MS	By matching	By matching	6.2	6.2	6.2	5646800	2971500	1753300	922030	7105800	0	0	0	0	0	0
Unspecific	c64311/1/1999|m.33651	c64311/1/1999|m.33651	c64311/1/1999|m.33651	CEMA_GOSHI^CEMA_GOSHI^Q:19-198,H:1-180^88.333%ID^E:2.48e-111^RecName: Full=Chloroplast envelope membrane protein;^Eukaryota; Viridiplantae; Streptophyta; Embryophyta; Tracheophyta; Spermatophyta; Magnoliophyta; eudicotyledons; Gunneridae; Pentapetalae; rosids; malvids; Malvales; Malvaceae; Malvoideae; Gossypium	1	1	1		1	1	1	1	1	0	0	1	0	0	1	0	0	4.1	4.1	4.1	25.754	218	218	0.010283	-0.0023912	By MS/MS			4.1	0	0	3874300	3874300	0	0	4796500	0	0	0	0	0	0
Unspecific	c65513/1/2143|m.34587	c65513/1/2143|m.34587	c65513/1/2143|m.34587	.	1	1	1		1	1	1	1	1	1	0	1	1	0	1	1	0	1.9	1.9	1.9	50.026	465	465	0.010256	-0.0023912	By matching	By MS/MS		1.9	1.9	0	3583800	2362500	1221300	0	0	5142600	0	0	0	0	0
Unspecific	c65514/1/2321|m.34592	c65514/1/2321|m.34592	c65514/1/2321|m.34592	ROGFE_ARATH^ROGFE_ARATH^Q:1-197,H:2-216^47.685%ID^E:2.59e-50^RecName: Full=Rop guanine nucleotide exchange factor 14;^Eukaryota; Viridiplantae; Streptophyta; Embryophyta; Tracheophyta; Spermatophyta; Magnoliophyta; eudicotyledons; Gunneridae; Pentapetalae; rosids; malvids; Brassicales; Brassicaceae; Camelineae; Arabidopsis	1	1	1		1	1	1	1	1	1	0	1	1	0	1	1	0	4.4	4.4	4.4	23.884	206	206	0.01023	-0.0023912	By matching	By MS/MS		4.4	4.4	0	1693300	1377600	315750	0	0	1329500	0	0	0	0	0
Unspecific	c6699/1/1452|m.6495	c6699/1/1452|m.6495	c6699/1/1452|m.6495	XYL1_ARATH^XYL1_ARATH^Q:1-139,H:539-677^84.173%ID^E:1.62e-79^RecName: Full=Alpha-xylosidase 1;^Eukaryota; Viridiplantae; Streptophyta; Embryophyta; Tracheophyta; Spermatophyta; Magnoliophyta; eudicotyledons; Gunneridae; Pentapetalae; rosids; malvids; Brassicales; Brassicaceae; Camelineae; Arabidopsis	1	1	1		1	1	1	1	0	1	1	0	1	1	0	1	1	6.4	6.4	6.4	15.906	140	140	0.010204	-0.0023912		By MS/MS	By matching	0	6.4	6.4	9763000	0	1219700	8543300	0	0	7829300	0	0	0	0
Unspecific	c68146/1/1387|m.36539	c68146/1/1387|m.36539	c68146/1/1387|m.36539	A494_ARATH^A494_ARATH^Q:312-989,H:83-307^35.776%ID^E:3.47e-16^RecName: Full=Probable cysteine proteinase A494;^Eukaryota; Viridiplantae; Streptophyta; Embryophyta; Tracheophyta; Spermatophyta; Magnoliophyta; eudicotyledons; Gunneridae; Pentapetalae; rosids; malvids; Brassicales; Brassicaceae; Camelineae; Arabidopsis	1	1	1		1	1	1	1	1	0	0	1	0	0	1	0	0	6.2	6.2	6.2	16.563	144	144	0.010178	-0.0023912	By MS/MS			6.2	0	0	1143600	1143600	0	0	2864800	0	0	0	0	0	0
Unspecific	c6840/1/1580|m.6656	c6840/1/1580|m.6656	c6840/1/1580|m.6656	.	1	1	1		1	1	1	1	1	1	0	1	1	0	1	1	0	4.4	4.4	4.4	23.222	203	203	0.010152	-0.0023912	By matching	By MS/MS		4.4	4.4	0	9389500	7366600	2023000	0	9441000	0	0	0	0	0	0
Unspecific	c69222/1/1646|m.37394	c69222/1/1646|m.37394	c69222/1/1646|m.37394	AGO5_ARATH^AGO5_ARATH^Q:2-222,H:513-733^59.009%ID^E:1.01e-80^RecName: Full=Protein argonaute 5;^Eukaryota; Viridiplantae; Streptophyta; Embryophyta; Tracheophyta; Spermatophyta; Magnoliophyta; eudicotyledons; Gunneridae; Pentapetalae; rosids; malvids; Brassicales; Brassicaceae; Camelineae; Arabidopsis	1	1	1		1	1	1	1	0	1	0	0	1	0	0	1	0	4	4	4	24.517	223	223	0.010127	-0.0023912		By MS/MS		0	4	0	825260	0	825260	0	0	3474900	0	0	0	0	0
Unspecific	c6950/1/1690|m.6758	c6950/1/1690|m.6758	c6950/1/1690|m.6758	CHD4_MOUSE^CHD4_MOUSE^Q:127-273,H:364-500^31.373%ID^E:2.46e-10^RecName: Full=Chromodomain-helicase-DNA-binding protein 4;^Eukaryota; Metazoa; Chordata; Craniata; Vertebrata; Euteleostomi; Mammalia; Eutheria; Euarchontoglires; Glires; Rodentia; Sciurognathi; Muroidea; Muridae; Murinae; Mus; Mus	1	1	1		1	1	1	1	0	1	0	0	1	0	0	1	0	1.9	1.9	1.9	52.632	477	477	0.010101	-0.0023912		By MS/MS		0	1.9	0	495260	0	495260	0	0	2085400	0	0	0	0	0
Unspecific	c70099/2/1325|m.38071	c70099/2/1325|m.38071	c70099/2/1325|m.38071	YJBQ_ECOLI^YJBQ_ECOLI^Q:53-122,H:4-73^42.254%ID^E:1.05e-08^RecName: Full=UPF0047 protein YjbQ;^Bacteria; Proteobacteria; Gammaproteobacteria; Enterobacteriales; Enterobacteriaceae; Escherichia	1	1	1		1	1	1	1	1	0	0	1	0	0	1	0	0	6.4	6.4	6.4	15.969	141	141	0.010076	-0.0023912	By MS/MS			6.4	0	0	748510	748510	0	0	1875000	0	0	0	0	0	0
Unspecific	c70713/1/1537|m.38533	c70713/1/1537|m.38533	c70713/1/1537|m.38533	.	1	1	1		1	1	1	1	1	0	0	1	0	0	1	0	0	3.2	3.2	3.2	30.422	279	279	0.01005	-0.0023912	By MS/MS			3.2	0	0	46756	46756	0	0	117130	0	0	0	0	0	0
Unspecific	c70728/1/1585|m.38548	c70728/1/1585|m.38548	c70728/1/1585|m.38548	NUP35_ARATH^NUP35_ARATH^Q:1-328,H:1-329^69.184%ID^E:2.45e-159^RecName: Full=Nuclear pore complex protein NUP35 {ECO:0000303|PubMed:21189294};^Eukaryota; Viridiplantae; Streptophyta; Embryophyta; Tracheophyta; Spermatophyta; Magnoliophyta; eudicotyledons; Gunneridae; Pentapetalae; rosids; malvids; Brassicales; Brassicaceae; Camelineae; Arabidopsis	1	1	1		1	1	1	1	0	1	0	0	1	0	0	1	0	2.7	2.7	2.7	35.692	328	328	0.010025	-0.0023912		By MS/MS		0	2.7	0	3557600	0	3557600	0	0	14980000	0	0	0	0	0
Unspecific	c71438/1/1561|m.39106	c71438/1/1561|m.39106	c71438/1/1561|m.39106	TAL_THIDA^TAL_THIDA^Q:3-121,H:17-139^47.154%ID^E:2.59e-27^RecName: Full=Transaldolase {ECO:0000255|HAMAP-Rule:MF_00493};^Bacteria; Proteobacteria; Betaproteobacteria; Hydrogenophilales; Hydrogenophilaceae; Thiobacillus	1	1	1		1	1	1	1	1	1	1	1	1	1	1	1	1	6.5	6.5	6.5	15.617	139	139	0.01	-0.0023912	By matching	By MS/MS	By matching	6.5	6.5	6.5	5964500	5174300	178550	611650	5422000	0	0	0	0	0	0
Unspecific	c71483/1/2478|m.39153	c71483/1/2478|m.39153	c71483/1/2478|m.39153	WAKLH_ARATH^WAKLH_ARATH^Q:1315-1791,H:523-681^40.491%ID^E:1.09e-46^RecName: Full=Wall-associated receptor kinase-like 9;^Eukaryota; Viridiplantae; Streptophyta; Embryophyta; Tracheophyta; Spermatophyta; Magnoliophyta; eudicotyledons; Gunneridae; Pentapetalae; rosids; malvids; Brassicales; Brassicaceae; Camelineae; Arabidopsis`WAKLH_ARATH^WAKLH_ARATH^Q:946-1161,H:397-469^48.649%ID^E:1.09e-46^RecNa…	1	1	1		1	1	1	1	1	0	1	1	0	1	1	0	1	8.7	8.7	8.7	11.478	103	103	0.0099751	-0.0023912	By MS/MS		By matching	8.7	0	8.7	50217000	36091000	0	14127000	0	0	35553000	0	0	0	0
Unspecific	c72608/1/1726|m.40099	c72608/1/1726|m.40099	c72608/1/1726|m.40099	AUXI1_ARATH^AUXI1_ARATH^Q:1-279,H:256-476^34.035%ID^E:2.5e-21^RecName: Full=Auxilin-related protein 1;^Eukaryota; Viridiplantae; Streptophyta; Embryophyta; Tracheophyta; Spermatophyta; Magnoliophyta; eudicotyledons; Gunneridae; Pentapetalae; rosids; malvids; Brassicales; Brassicaceae; Camelineae; Arabidopsis	1	1	1		1	1	1	1	0	1	0	0	1	0	0	1	0	3.2	3.2	3.2	30.391	280	280	0.0099502	-0.0023912		By MS/MS		0	3.2	0	676570	0	676570	0	0	2848900	0	0	0	0	0
Unspecific	c74058/1/1632|m.41175	c74058/1/1632|m.41175	c74058/1/1632|m.41175	F3PH_PETHY^F3PH_PETHY^Q:62-134,H:238-305^66.216%ID^E:3.01e-20^RecName: Full=Flavonoid 3'-monooxygenase;^Eukaryota; Viridiplantae; Streptophyta; Embryophyta; Tracheophyta; Spermatophyta; Magnoliophyta; eudicotyledons; Gunneridae; Pentapetalae; asterids; lamiids; Solanales; Solanaceae; Petunioideae; Petunia	1	1	1		1	1	1	1	1	0	0	1	0	0	1	0	0	6.2	6.2	6.2	16.305	145	145	0.0099256	-0.0023912	By MS/MS			6.2	0	0	782120	782120	0	0	1959200	0	0	0	0	0	0
Unspecific	c7969/1/1534|m.7705	c7969/1/1534|m.7705	c7969/1/1534|m.7705	P4KG7_ARATH^P4KG7_ARATH^Q:1-425,H:163-614^63.676%ID^E:0^RecName: Full=Phosphatidylinositol 4-kinase gamma 7;^Eukaryota; Viridiplantae; Streptophyta; Embryophyta; Tracheophyta; Spermatophyta; Magnoliophyta; eudicotyledons; Gunneridae; Pentapetalae; rosids; malvids; Brassicales; Brassicaceae; Camelineae; Arabidopsis	1	1	1		1	1	1	1	1	1	1	1	1	1	1	1	1	2.1	2.1	2.1	48.287	430	430	0.009901	-0.0023912	By MS/MS	By matching	By matching	2.1	2.1	2.1	12685000	5365300	3229700	4090200	0	0	11598000	0	0	0	0
Unspecific	c843/7/1543|m.731	c843/7/1543|m.731	c843/7/1543|m.731	TRPD_ARATH^TRPD_ARATH^Q:52-396,H:99-443^75.942%ID^E:0^RecName: Full=Anthranilate phosphoribosyltransferase, chloroplastic;^Eukaryota; Viridiplantae; Streptophyta; Embryophyta; Tracheophyta; Spermatophyta; Magnoliophyta; eudicotyledons; Gunneridae; Pentapetalae; rosids; malvids; Brassicales; Brassicaceae; Camelineae; Arabidopsis	1	1	1		1	1	1	1	1	0	0	1	0	0	1	0	0	2.2	2.2	2.2	42.408	401	401	0.0098522	-0.0023912	By MS/MS			2.2	0	0	3527800	3527800	0	0	8837400	0	0	0	0	0	0
Unspecific	c8693/1/1366|m.8429	c8693/1/1366|m.8429	c8693/1/1366|m.8429	.	1	1	1		1	1	1	1	0	1	1	0	1	1	0	1	1	7.1	7.1	7.1	14.406	126	126	0.009828	-0.0023912		By MS/MS	By matching	0	7.1	7.1	5867200	0	2556800	3310400	0	0	8222100	0	0	0	0
Unspecific	c8928/1/2501|m.8636	c8928/1/2501|m.8636	c8928/1/2501|m.8636	.	1	1	1		1	1	1	1	0	1	0	0	1	0	0	1	0	4.5	4.5	4.5	22.331	198	198	0.00978	-0.0023912		By MS/MS		0	4.5	0	11201000	0	11201000	0	0	16346000	0	0	0	0	0
Unspecific	c9227/2/1549|m.8930	c9227/2/1549|m.8930	c9227/2/1549|m.8930	ARFF_ARATH^ARFF_ARATH^Q:89-336,H:583-836^41.379%ID^E:6.75e-34^RecName: Full=Auxin response factor 6;^Eukaryota; Viridiplantae; Streptophyta; Embryophyta; Tracheophyta; Spermatophyta; Magnoliophyta; eudicotyledons; Gunneridae; Pentapetalae; rosids; malvids; Brassicales; Brassicaceae; Camelineae; Arabidopsis	1	1	1		1	1	1	1	0	1	1	0	1	1	0	1	1	2.7	2.7	2.7	37.781	339	339	0.0097561	-0.0023912		By MS/MS	By matching	0	2.7	2.7	2562200	0	44884	2517300	0	0	3816400	0	0	0	0
Unspecific	c9364/1/1855|m.9029	c9364/1/1855|m.9029	c9364/1/1855|m.9029	PP1R8_BOVIN^PP1R8_BOVIN^Q:79-348,H:1-255^27.018%ID^E:2.06e-24^RecName: Full=Nuclear inhibitor of protein phosphatase 1;^Eukaryota; Metazoa; Chordata; Craniata; Vertebrata; Euteleostomi; Mammalia; Eutheria; Laurasiatheria; Cetartiodactyla; Ruminantia; Pecora; Bovidae; Bovinae; Bos	1	1	1		1	1	1	1	1	0	0	1	0	0	1	0	0	2.1	2.1	2.1	46.127	426	426	0.0097324	-0.0023912	By MS/MS			2.1	0	0	3364600	3364600	0	0	8428400	0	0	0	0	0	0
Unspecific	NrNep5	NrNep5	NrNep5	#N/A	1	1	1		1	1	1	1	1	1	1	1	1	1	1	1	1	2	2	2	47.971	446	446	0.0095923	-0.0023912	By MS/MS	By matching	By matching	2	2	2	72973000	48981000	19875000	4117400	85900000	0	0	0	0	0	0
Unspecific	BAF98919.1;NrChit1	BAF98919.1;NrChit1	BAF98919.1	#N/A	1;1	1;1	1;1	;	2	1	1	1	1	1	1	1	1	1	1	1	1	5.1	5.1	5.1	29.027	277	277;279	0	3.6888	By matching	By MS/MS	By MS/MS	5.1	5.1	5.1	3868700	460010	0	3408700	0	0	8590700	0	1	4	5
Unspecific	c10226/1/1442|m.9826;c8142/1/1573|m.7894	c10226/1/1442|m.9826;c8142/1/1573|m.7894	c10226/1/1442|m.9826	MCFB_DICDI^MCFB_DICDI^Q:9-147,H:290-426^41.727%ID^E:2.07e-29^RecName: Full=Mitochondrial substrate carrier family protein B;^Eukaryota; Amoebozoa; Mycetozoa; Dictyosteliida; Dictyostelium`MCFB_DICDI^MCFB_DICDI^Q:11-151,H:196-331^32.168%ID^E:2.94e-14^RecName: Full=Mitochondrial substrate carrier family protein B;^Eukaryota; Amoebozoa; Mycetozoa; Dictyosteliida; Dictyostelium	1;1	1;1	1;1	;	2	1	1	1	0	0	1	0	0	1	0	0	1	7.9	7.9	7.9	16.701	151	151;264	0	5.0455			By MS/MS	0	0	7.9	14617000	0	0	14617000	0	0	17348000	0	0	4	4
Unspecific	c114526/1/1208|m.49718;c207794/5/1481|m.82528	c114526/1/1208|m.49718;c207794/5/1481|m.82528	c114526/1/1208|m.49718	RR1_SPIOL^RR1_SPIOL^Q:1-360,H:52-411^89.444%ID^E:0^RecName: Full=30S ribosomal protein S1, chloroplastic;^Eukaryota; Viridiplantae; Streptophyta; Embryophyta; Tracheophyta; Spermatophyta; Magnoliophyta; eudicotyledons; Gunneridae; Pentapetalae; Caryophyllales; Amaranthaceae; Chenopodioideae; Anserineae; Spinacia	1;1	1;1	1;1	;	2	1	1	1	0	1	0	0	1	0	0	1	0	3.6	3.6	3.6	39.217	360	360;417	0	0.44265		By MS/MS		0	3.6	0	9262000	0	9262000	0	0	11527000	0	0	1	0	1
Unspecific	c128111/1/1406|m.59860;c117812/1/2515|m.52185	c128111/1/1406|m.59860;c117812/1/2515|m.52185	c128111/1/1406|m.59860	MBR1_ARATH^MBR1_ARATH^Q:496-1071,H:439-642^45.366%ID^E:1.84e-51^RecName: Full=E3 ubiquitin-protein ligase MBR1;^Eukaryota; Viridiplantae; Streptophyta; Embryophyta; Tracheophyta; Spermatophyta; Magnoliophyta; eudicotyledons; Gunneridae; Pentapetalae; rosids; malvids; Brassicales; Brassicaceae; Camelineae; Arabidopsis`MBR1_ARATH^MBR1_ARATH^Q:1092-1223,H:653-696^72.727%ID^E:1.84e-51^RecName: Full=E…	1;1	1;1	1;1	;	2	1	1	1	1	0	0	1	0	0	1	0	0	7.2	7.2	7.2	17.758	166	166;433	0	0.48383	By MS/MS			7.2	0	0	11428000	11428000	0	0	12050000	0	0	1	0	0	1
Unspecific	c66450/1/1754|m.35290;c124076/1/2113|m.56872	c66450/1/1754|m.35290;c124076/1/2113|m.56872	c66450/1/1754|m.35290	. PREDICTED: uncharacterized protein LOC100242253 isoform X1 [Vitis vinifera]^3e-16^54%^XP_002279093.2	1;1	1;1	1;1	;	2	1	1	1	1	0	1	1	0	1	1	0	1	15	15	15	11.414	100	100;100	0	1.5041	By matching		By MS/MS	15	0	15	128390000	5097200	0	123300000	0	0	140610000	0	0	5	5
Unspecific	c12646/1/1409|m.11889;c63098/6/1421|m.32766	c12646/1/1409|m.11889;c63098/6/1421|m.32766	c12646/1/1409|m.11889	TLP1_PRUPE^TLP1_PRUPE^Q:43-292,H:2-246^54.8%ID^E:2.27e-87^RecName: Full=Thaumatin-like protein 1;^Eukaryota; Viridiplantae; Streptophyta; Embryophyta; Tracheophyta; Spermatophyta; Magnoliophyta; eudicotyledons; Gunneridae; Pentapetalae; rosids; fabids; Rosales; Rosaceae; Maloideae; Amygdaleae; Prunus	1;1	1;1	1;1	;	2	1	1	1	1	0	0	1	0	0	1	0	0	3.9	3.9	3.9	32.376	306	306;358	0	1.0904	By MS/MS			3.9	0	0	1500400	1500400	0	0	4849500	0	0	1	0	0	1
Unspecific	c162875/1/1300|m.67430;c14224/1/1212|m.13258	c162875/1/1300|m.67430;c14224/1/1212|m.13258	c162875/1/1300|m.67430	Y4597_ARATH^Y4597_ARATH^Q:3-197,H:89-276^59.184%ID^E:1.11e-78^RecName: Full=Uncharacterized protein At4g15970;^Eukaryota; Viridiplantae; Streptophyta; Embryophyta; Tracheophyta; Spermatophyta; Magnoliophyta; eudicotyledons; Gunneridae; Pentapetalae; rosids; malvids; Brassicales; Brassicaceae; Camelineae; Arabidopsis	1;1	1;1	1;1	;	2	1	1	1	0	0	1	0	0	1	0	0	1	8	8	8	23.341	199	199;345	0	2.4329			By MS/MS	0	0	8	71559000	0	0	71559000	0	0	78809000	0	0	2	2
Unspecific	c212217/2/1228|m.85954;c169438/1/1075|m.72461	c212217/2/1228|m.85954;c169438/1/1075|m.72461	c212217/2/1228|m.85954	SSRA_ARATH^SSRA_ARATH^Q:214-552,H:59-172^68.421%ID^E:2.35e-53^RecName: Full=Translocon-associated protein subunit alpha;^Eukaryota; Viridiplantae; Streptophyta; Embryophyta; Tracheophyta; Spermatophyta; Magnoliophyta; eudicotyledons; Gunneridae; Pentapetalae; rosids; malvids; Brassicales; Brassicaceae; Camelineae; Arabidopsis`SSRA_ARATH^SSRA_ARATH^Q:549-764,H:172-243^63.889%ID^E:2.35e-53^RecName:…	1;1	1;1	1;1	;	2	1	1	1	0	0	1	0	0	1	0	0	1	12.8	12.8	12.8	12.144	109	109;267	0	0.76199			By MS/MS	0	0	12.8	8545800	0	0	8545800	0	0	40927000	0	0	1	1
Unspecific	c26091/1/1561|m.16299;c75210/1/1649|m.42069	c26091/1/1561|m.16299;c75210/1/1649|m.42069	c26091/1/1561|m.16299	SGS3_SOLLC^SGS3_SOLLC^Q:1-140,H:431-570^62.143%ID^E:1.67e-46^RecName: Full=Protein SUPPRESSOR OF GENE SILENCING 3;^Eukaryota; Viridiplantae; Streptophyta; Embryophyta; Tracheophyta; Spermatophyta; Magnoliophyta; eudicotyledons; Gunneridae; Pentapetalae; asterids; lamiids; Solanales; Solanaceae; Solanoideae; Solaneae; Solanum; Lycopersicon	1;1	1;1	1;1	;	2	1	1	1	0	0	1	0	0	1	0	0	1	9.4	9.4	9.4	19.523	160	160;375	0	2.2743			By MS/MS	0	0	9.4	11482000	0	0	11482000	0	0	10590000	0	0	1	1
Unspecific	c156954/2/966|m.62833;c296739/1/1005|m.23114	c156954/2/966|m.62833;c296739/1/1005|m.23114	c156954/2/966|m.62833	FLA13_ARATH^FLA13_ARATH^Q:35-245,H:14-226^55.399%ID^E:2.21e-74^RecName: Full=Fasciclin-like arabinogalactan protein 13;^Eukaryota; Viridiplantae; Streptophyta; Embryophyta; Tracheophyta; Spermatophyta; Magnoliophyta; eudicotyledons; Gunneridae; Pentapetalae; rosids; malvids; Brassicales; Brassicaceae; Camelineae; Arabidopsis	2;1	2;1	2;1	;	2	2	2	2	0	2	0	0	2	0	0	2	0	7.5	7.5	7.5	28.148	268	268;268	0	1.9432		By MS/MS		0	7.5	0	34126000	0	34126000	0	0	65327000	0	0	8	0	8
Unspecific	c165535/1/1551|m.69432;c16496/4/1483|m.14164	c165535/1/1551|m.69432;c16496/4/1483|m.14164	c165535/1/1551|m.69432	NEP2_NEPGR^NEP2_NEPGR^Q:1-439,H:1-435^51.577%ID^E:1.85e-140^RecName: Full=Aspartic proteinase nepenthesin-2;^Eukaryota; Viridiplantae; Streptophyta; Embryophyta; Tracheophyta; Spermatophyta; Magnoliophyta; eudicotyledons; Gunneridae; Pentapetalae; Caryophyllales; Nepenthaceae; Nepenthes	6;4	1;1	1;1	;	2	6	1	1	3	2	4	0	1	1	0	1	1	12.2	2.3	2.3	48.272	442	442;321	0	9.1113	By matching	By matching	By MS/MS	7	4.3	7.5	12196000	0	2072900	10123000	0	0	28714000	0	0	1	1
Unspecific	c218739/9/1470|m.89940;NrNep3	c218739/9/1470|m.89940;NrNep3	c218739/9/1470|m.89940	NEP2_NEPGR^NEP2_NEPGR^Q:1-439,H:1-435^52.027%ID^E:4.27e-143^RecName: Full=Aspartic proteinase nepenthesin-2;^Eukaryota; Viridiplantae; Streptophyta; Embryophyta; Tracheophyta; Spermatophyta; Magnoliophyta; eudicotyledons; Gunneridae; Pentapetalae; Caryophyllales; Nepenthaceae; Nepenthes	7;5	7;5	2;0	;	2	7	7	2	4	1	4	4	1	4	1	0	1	12	12	3.2	48.31	442	442;442	0	19.536	By MS/MS	By matching	By MS/MS	10.2	2	7	51519000	30895000	86839	20537000	0	0	62889000	8	0	7	15
Unspecific	NrGlu1;c247866/1/1292|m.92802	NrGlu1;c247866/1/1292|m.92802	NrGlu1	#N/A	11;9	11;9	11;9	;	2	11	11	11	0	9	5	0	9	5	0	9	5	19.1	19.1	19.1	36.752	335	335;309	0	323.31		By MS/MS	By MS/MS	0	12.5	18.8	281030000	0	237660000	43370000	0	258830000	344960000	0	65	12	77
Unspecific	Q766C2.1;NrNep2	Q766C2.1;NrNep2	Q766C2.1	#N/A	3;3	1;1	1;1	;	2	3	1	1	0	2	2	0	0	1	0	0	1	4.8	2.1	2.1	46.174	438	438;438	0.0096154	-0.0023912		By matching	By MS/MS	0	2.7	4.8	1589900	0	0	1589900	0	0	4719300	0	0	0	0
Unspecific	NrNpr1;c67319/4/1340|m.35905	NrNpr1;c67319/4/1340|m.35905	NrNpr1	#N/A	29;28	2;2	2;2	;	2	29	2	2	1	22	25	0	2	1	0	2	1	29.5	3.9	3.9	42.788	387	387;387	0	31.54	By matching	By MS/MS	By MS/MS	3.4	27.1	21.4	51161000	0	34357000	16804000	0	85488000	0	0	8	3	11
Unspecific	c10562/2/1681|m.10124;c6584/1/1588|m.6372	c10562/2/1681|m.10124;c6584/1/1588|m.6372	c10562/2/1681|m.10124	CHID1_XENLA^CHID1_XENLA^Q:24-225,H:202-393^42.439%ID^E:6.59e-46^RecName: Full=Chitinase domain-containing protein 1;^Eukaryota; Metazoa; Chordata; Craniata; Vertebrata; Euteleostomi; Amphibia; Batrachia; Anura; Pipoidea; Pipidae; Xenopodinae; Xenopus; Xenopus	1;1	1;1	1;1	;	2	1	1	1	0	1	0	0	1	0	0	1	0	4	4	4	25.671	225	225;403	0.04	-0.0023912		By MS/MS		0	4	0	1593600	0	1593600	0	0	6710000	0	0	0	0	0
Unspecific	c64979/1/1287|m.34166;c10627/1/1641|m.10172	c64979/1/1287|m.34166;c10627/1/1641|m.10172	c64979/1/1287|m.34166	ELF3_ARATH^ELF3_ARATH^Q:9-155,H:345-488^42.667%ID^E:4.93e-19^RecName: Full=Protein EARLY FLOWERING 3;^Eukaryota; Viridiplantae; Streptophyta; Embryophyta; Tracheophyta; Spermatophyta; Magnoliophyta; eudicotyledons; Gunneridae; Pentapetalae; rosids; malvids; Brassicales; Brassicaceae; Camelineae; Arabidopsis	1;1	1;1	1;1	;	2	1	1	1	1	1	1	1	1	1	1	1	1	5.5	5.5	5.5	18.109	164	164;222	0.039216	-0.0023912	By matching	By MS/MS	By matching	5.5	5.5	5.5	7649100	4435300	1716200	1497500	8815000	0	0	0	0	0	0
Unspecific	c110782/3/2268|m.46820;c307386/1/1419|m.30044	c110782/3/2268|m.46820;c307386/1/1419|m.30044	c110782/3/2268|m.46820	MAOM_SOLTU^MAOM_SOLTU^Q:1-169,H:273-441^88.166%ID^E:2.42e-101^RecName: Full=NAD-dependent malic enzyme 62 kDa isoform, mitochondrial;^Eukaryota; Viridiplantae; Streptophyta; Embryophyta; Tracheophyta; Spermatophyta; Magnoliophyta; eudicotyledons; Gunneridae; Pentapetalae; asterids; lamiids; Solanales; Solanaceae; Solanoideae; Solaneae; Solanum	1;1	1;1	1;1	;	2	1	1	1	1	1	1	1	1	1	1	1	1	5.1	5.1	5.1	19.403	176	176;353	0.035714	-0.0023912	By MS/MS	By matching	By matching	5.1	5.1	5.1	34909000	23274000	7492300	4142300	45922000	0	0	0	0	0	0
Unspecific	c111265/1/1577|m.47420;c258931/1/2256|m.101074	c111265/1/1577|m.47420;c258931/1/2256|m.101074	c111265/1/1577|m.47420	ATE1_ARATH^ATE1_ARATH^Q:5-329,H:253-594^53.409%ID^E:1.06e-111^RecName: Full=Arginyl-tRNA--protein transferase 1;^Eukaryota; Viridiplantae; Streptophyta; Embryophyta; Tracheophyta; Spermatophyta; Magnoliophyta; eudicotyledons; Gunneridae; Pentapetalae; rosids; malvids; Brassicales; Brassicaceae; Camelineae; Arabidopsis	1;1	1;1	1;1	;	2	1	1	1	0	1	0	0	1	0	0	1	0	2.7	2.7	2.7	38.781	339	339;610	0.035088	-0.0023912		By MS/MS		0	2.7	0	1357300	0	1357300	0	0	5715400	0	0	0	0	0
Unspecific	c114091/1/1885|m.49408;c303240/1/1472|m.28133	c114091/1/1885|m.49408;c303240/1/1472|m.28133	c114091/1/1885|m.49408	AAAS_ARATH^AAAS_ARATH^Q:20-136,H:242-360^55.462%ID^E:5.9e-32^RecName: Full=Aladin {ECO:0000303|PubMed:21189294};^Eukaryota; Viridiplantae; Streptophyta; Embryophyta; Tracheophyta; Spermatophyta; Magnoliophyta; eudicotyledons; Gunneridae; Pentapetalae; rosids; malvids; Brassicales; Brassicaceae; Camelineae; Arabidopsis	1;1	1;1	1;1	;	2	1	1	1	0	1	0	0	1	0	0	1	0	6.3	6.3	6.3	15.861	142	142;235	0.031496	-0.0023912		By MS/MS		0	6.3	0	2459700	0	2459700	0	0	10357000	0	0	0	0	0
Unspecific	c114322/1/2166|m.49556;c168949/1/2185|m.72057	c114322/1/2166|m.49556;c168949/1/2185|m.72057	c114322/1/2166|m.49556	SAM50_MOUSE^SAM50_MOUSE^Q:825-1694,H:201-463^27.815%ID^E:9.29e-14^RecName: Full=Sorting and assembly machinery component 50 homolog;^Eukaryota; Metazoa; Chordata; Craniata; Vertebrata; Euteleostomi; Mammalia; Eutheria; Euarchontoglires; Glires; Rodentia; Sciurognathi; Muroidea; Muridae; Murinae; Mus; Mus	1;1	1;1	1;1	;	2	1	1	1	0	1	1	0	1	1	0	1	1	4.2	4.2	4.2	23.526	213	213;400	0.030769	-0.0023912		By MS/MS	By matching	0	4.2	4.2	549200	0	189730	359470	0	0	947790	0	0	0	0
Unspecific	c115262/2/2141|m.50253;c162797/1/2280|m.67362	c115262/2/2141|m.50253;c162797/1/2280|m.67362	c115262/2/2141|m.50253	BH003_ARATH^BH003_ARATH^Q:1-124,H:1-118^43.411%ID^E:3.49e-24^RecName: Full=Transcription factor bHLH3;^Eukaryota; Viridiplantae; Streptophyta; Embryophyta; Tracheophyta; Spermatophyta; Magnoliophyta; eudicotyledons; Gunneridae; Pentapetalae; rosids; malvids; Brassicales; Brassicaceae; Camelineae; Arabidopsis	1;1	1;1	1;1	;	2	1	1	1	1	1	1	1	1	1	1	1	1	5.8	5.8	5.8	17.071	154	154;314	0.029412	-0.0023912	By matching	By MS/MS	By matching	5.8	5.8	5.8	35048000	23085000	3637600	8326100	58632000	0	0	0	0	0	0
Unspecific	c118621/1/1406|m.52819;c11555/2/1430|m.10987	c118621/1/1406|m.52819;c11555/2/1430|m.10987	c118621/1/1406|m.52819	SUD1_ARATH^SUD1_ARATH^Q:62-120,H:68-129^33.871%ID^E:1.46e-07^RecName: Full=Probable E3 ubiquitin ligase SUD1;^Eukaryota; Viridiplantae; Streptophyta; Embryophyta; Tracheophyta; Spermatophyta; Magnoliophyta; eudicotyledons; Gunneridae; Pentapetalae; rosids; malvids; Brassicales; Brassicaceae; Camelineae; Arabidopsis	1;1	1;1	1;1	;	2	1	1	1	0	1	0	0	1	0	0	1	0	6.6	6.6	6.6	15.318	136	136;262	0.028777	-0.0023912		By MS/MS		0	6.6	0	426140	0	426140	0	0	1794300	0	0	0	0	0
Unspecific	c117868/1/1906|m.52256;c159333/1/2046|m.64690	c117868/1/1906|m.52256;c159333/1/2046|m.64690	c117868/1/1906|m.52256	Y2296_ARATH^Y2296_ARATH^Q:1-138,H:1-136^53.901%ID^E:8.75e-37^RecName: Full=Probable receptor-like protein kinase At2g42960;^Eukaryota; Viridiplantae; Streptophyta; Embryophyta; Tracheophyta; Spermatophyta; Magnoliophyta; eudicotyledons; Gunneridae; Pentapetalae; rosids; malvids; Brassicales; Brassicaceae; Camelineae; Arabidopsis	1;1	1;1	1;1	;	2	1	1	1	1	0	0	1	0	0	1	0	0	6.2	6.2	6.2	16.109	144	144;159	0.026144	-0.0023912	By MS/MS			6.2	0	0	3059400	3059400	0	0	7663800	0	0	0	0	0	0
Unspecific	c78297/1/1405|m.45056;c118462/1/1361|m.52698	c78297/1/1405|m.45056;c118462/1/1361|m.52698	c78297/1/1405|m.45056	PPDEX_ARATH^PPDEX_ARATH^Q:16-157,H:27-168^58.451%ID^E:1.13e-64^RecName: Full=DeSI-like protein At4g17486;^Eukaryota; Viridiplantae; Streptophyta; Embryophyta; Tracheophyta; Spermatophyta; Magnoliophyta; eudicotyledons; Gunneridae; Pentapetalae; rosids; malvids; Brassicales; Brassicaceae; Camelineae; Arabidopsis	1;1	1;1	1;1	;	2	1	1	1	0	1	1	0	1	1	0	1	1	4.2	4.2	4.2	24.087	212	212;212	0.025974	-0.0023912		By MS/MS	By matching	0	4.2	4.2	1161300	0	403540	757750	0	0	1794000	0	0	0	0
Unspecific	c162777/1/1883|m.67343;c118645/1/2391|m.52831	c162777/1/1883|m.67343;c118645/1/2391|m.52831	c162777/1/1883|m.67343	GUF1_RICCO^GUF1_RICCO^Q:1-373,H:1-362^74.599%ID^E:0^RecName: Full=Translation factor GUF1 homolog, mitochondrial {ECO:0000255|HAMAP-Rule:MF_03137};^Eukaryota; Viridiplantae; Streptophyta; Embryophyta; Tracheophyta; Spermatophyta; Magnoliophyta; eudicotyledons; Gunneridae; Pentapetalae; rosids; fabids; Malpighiales; Euphorbiaceae; Acalyphoideae; Acalypheae; Ricinus	1;1	1;1	1;1	;	2	1	1	1	1	1	0	1	1	0	1	1	0	2.3	2.3	2.3	44.248	399	399;546	0.025806	-0.0023912	By matching	By MS/MS		2.3	2.3	0	12728000	9858200	2869600	0	17253000	0	0	0	0	0	0
Unspecific	c120012/1/1378|m.53886;c122533/1/1545|m.55740	c120012/1/1378|m.53886;c122533/1/1545|m.55740	c120012/1/1378|m.53886	.	1;1	1;1	1;1	;	2	1	1	1	0	1	0	0	1	0	0	1	0	8.3	8.3	8.3	12.194	108	108;413	0.025157	-0.0023912		By MS/MS		0	8.3	0	2708300	0	2708300	0	0	3952500	0	0	0	0	0
Unspecific	c120748/1/2196|m.54415;c1981/4/1334|m.2243	c120748/1/2196|m.54415;c1981/4/1334|m.2243	c120748/1/2196|m.54415	.	1;1	1;1	1;1	;	2	1	1	1	1	0	0	1	0	0	1	0	0	4.1	4.1	4.1	24.814	219	219;239	0.024845	-0.0023912	By MS/MS			4.1	0	0	1079500	1079500	0	0	2599800	0	0	0	0	0	0
Unspecific	c74362/1/1650|m.41413;c121929/1/1391|m.55298	c74362/1/1650|m.41413;c121929/1/1391|m.55298	c74362/1/1650|m.41413	SRF8_ARATH^SRF8_ARATH^Q:10-103,H:8-103^61.224%ID^E:1.84e-30^RecName: Full=Protein STRUBBELIG-RECEPTOR FAMILY 8;^Eukaryota; Viridiplantae; Streptophyta; Embryophyta; Tracheophyta; Spermatophyta; Magnoliophyta; eudicotyledons; Gunneridae; Pentapetalae; rosids; malvids; Brassicales; Brassicaceae; Camelineae; Arabidopsis	1;1	1;1	1;1	;	2	1	1	1	1	1	0	1	1	0	1	1	0	4.9	4.9	4.9	19.655	182	182;376	0.02454	-0.0023912	By MS/MS	By matching		4.9	4.9	0	5996600	4118900	1877600	0	0	7906300	0	0	0	0	0
Unspecific	c169667/1/1239|m.72619;c124800/1/1257|m.57407	c169667/1/1239|m.72619;c124800/1/1257|m.57407	c169667/1/1239|m.72619	CNBL4_ARATH^CNBL4_ARATH^Q:1-213,H:1-217^70.968%ID^E:5.51e-105^RecName: Full=Calcineurin B-like protein 4;^Eukaryota; Viridiplantae; Streptophyta; Embryophyta; Tracheophyta; Spermatophyta; Magnoliophyta; eudicotyledons; Gunneridae; Pentapetalae; rosids; malvids; Brassicales; Brassicaceae; Camelineae; Arabidopsis	1;1	1;1	1;1	;	2	1	1	1	0	1	1	0	1	1	0	1	1	4.2	4.2	4.2	24.597	213	213;213	0.024096	-0.0023912		By MS/MS	By matching	0	4.2	4.2	446930	0	41909	405020	0	0	1067900	0	0	0	0
Unspecific	c25879/1/1633|m.16157;c124834/1/1771|m.57430	c25879/1/1633|m.16157;c124834/1/1771|m.57430	c25879/1/1633|m.16157	MDA1_ARATH^MDA1_ARATH^Q:560-679,H:143-181^50%ID^E:6.46e-10^RecName: Full=Mediator-associated protein 1;^Eukaryota; Viridiplantae; Streptophyta; Embryophyta; Tracheophyta; Spermatophyta; Magnoliophyta; eudicotyledons; Gunneridae; Pentapetalae; rosids; malvids; Brassicales; Brassicaceae; Camelineae; Arabidopsis`MDA1_ARATH^MDA1_ARATH^Q:679-831,H:182-236^41.818%ID^E:6.46e-10^RecName: Full=Mediator-as…	1;1	1;1	1;1	;	2	1	1	1	0	1	1	0	1	1	0	1	1	4.8	4.8	4.8	20.551	187	187;237	0.023952	-0.0023912		By MS/MS	By matching	0	4.8	4.8	2513900	0	885430	1628500	0	0	4293700	0	0	0	0
Unspecific	c12603/3/1818|m.11853;c269839/1/1717|m.30125	c12603/3/1818|m.11853;c269839/1/1717|m.30125	c12603/3/1818|m.11853	.	1;1	1;1	1;1	;	2	1	1	1	1	1	1	1	1	1	1	1	1	2.4	2.4	2.4	42.666	376	376;529	0.023392	-0.0023912	By matching	By MS/MS	By matching	2.4	2.4	2.4	3867400	134140	1660900	2072300	0	0	8472900	0	0	0	0
Unspecific	c76208/1/1167|m.43077;c126310/1/1873|m.58508	c76208/1/1167|m.43077;c126310/1/1873|m.58508	c76208/1/1167|m.43077	YG31B_YEAST^YG31B_YEAST^Q:53-154,H:1292-1325^50%ID^E:1.24e-07^RecName: Full=Transposon Ty3-G Gag-Pol polyprotein;^Eukaryota; Fungi; Dikarya; Ascomycota; Saccharomycotina; Saccharomycetes; Saccharomycetales; Saccharomycetaceae; Saccharomyces`YG31B_YEAST^YG31B_YEAST^Q:198-551,H:1340-1459^25.806%ID^E:1.24e-07^RecName: Full=Transposon Ty3-G Gag-Pol polyprotein;^Eukaryota; Fungi; Dikarya; Ascomycota; …	1;1	1;1	1;1	;	2	1	1	1	1	0	1	1	0	1	1	0	1	5.4	5.4	5.4	18.462	166	166;196	0.023121	-0.0023912	By MS/MS		By matching	5.4	0	5.4	9832200	7607900	0	2224400	16084000	0	0	0	0	0	0
Unspecific	c155072/3/1540|m.61298;c127016/1/1898|m.59077	c155072/3/1540|m.61298;c127016/1/1898|m.59077	c155072/3/1540|m.61298	.	1;1	1;1	1;1	;	2	1	1	1	1	1	1	1	1	1	1	1	1	7.2	7.2	7.2	14.591	125	125;365	0.022472	-0.0023912	By matching	By MS/MS	By matching	7.2	7.2	7.2	16188000	9899400	4783600	1505000	0	0	4737400	0	0	0	0
Unspecific	c305259/1/1776|m.29081;c14619/2/1731|m.13574	c305259/1/1776|m.29081;c14619/2/1731|m.13574	c305259/1/1776|m.29081	RGAPX_ARATH^RGAPX_ARATH^Q:1-62,H:243-304^62.903%ID^E:1.17e-20^RecName: Full=Uncharacterized Rho GTPase-activating protein At5g61530;^Eukaryota; Viridiplantae; Streptophyta; Embryophyta; Tracheophyta; Spermatophyta; Magnoliophyta; eudicotyledons; Gunneridae; Pentapetalae; rosids; malvids; Brassicales; Brassicaceae; Camelineae; Arabidopsis	1;1	1;1	1;1	;	2	1	1	1	0	1	0	0	1	0	0	1	0	7.6	7.6	7.6	14.072	119	119;359	0.02139	-0.0023912		By MS/MS		0	7.6	0	3943100	0	3943100	0	0	16603000	0	0	0	0	0
Unspecific	c64735/2/1606|m.33969;c156008/1/1435|m.62061	c64735/2/1606|m.33969;c156008/1/1435|m.62061	c64735/2/1606|m.33969	RS6_ALCBS^RS6_ALCBS^Q:136-247,H:1-110^41.964%ID^E:8.11e-24^RecName: Full=30S ribosomal protein S6 {ECO:0000255|HAMAP-Rule:MF_00360};^Bacteria; Proteobacteria; Gammaproteobacteria; Oceanospirillales; Alcanivoracaceae; Alcanivorax	1;1	1;1	1;1	;	2	1	1	1	1	1	0	1	1	0	1	1	0	2.8	2.8	2.8	36.876	318	318;318	0.020408	-0.0023912	By matching	By MS/MS		2.8	2.8	0	1306100	649760	656350	0	0	2763700	0	0	0	0	0
Unspecific	c261025/1/1448|m.102624;c159577/3/2018|m.64910	c261025/1/1448|m.102624;c159577/3/2018|m.64910	c261025/1/1448|m.102624	.	1;1	1;1	1;1	;	2	1	1	1	0	1	1	0	1	1	0	1	1	2.7	2.7	2.7	36.226	333	333;582	0.019512	-0.0023912		By MS/MS	By matching	0	2.7	2.7	5081100	0	3940700	1140400	0	0	2699800	0	0	0	0
Unspecific	c6157/2/1824|m.5986;c159583/1/901|m.64916	c6157/2/1824|m.5986;c159583/1/901|m.64916	c6157/2/1824|m.5986	ACOT9_HUMAN^ACOT9_HUMAN^Q:2-100,H:139-234^34.615%ID^E:9.9e-06^RecName: Full=Acyl-coenzyme A thioesterase 9, mitochondrial;^Eukaryota; Metazoa; Chordata; Craniata; Vertebrata; Euteleostomi; Mammalia; Eutheria; Euarchontoglires; Primates; Haplorrhini; Catarrhini; Hominidae; Homo	1;1	1;1	1;1	;	2	1	1	1	1	0	0	1	0	0	1	0	0	7.6	7.6	7.6	13.227	118	118;283	0.019417	-0.0023912	By MS/MS			7.6	0	0	232610	232610	0	0	582690	0	0	0	0	0	0
Unspecific	c161870/1/2070|m.66679;c170026/1/1406|m.72888	c161870/1/2070|m.66679;c170026/1/1406|m.72888	c161870/1/2070|m.66679	NHAD_VIBPH^NHAD_VIBPH^Q:31-161,H:280-406^38.346%ID^E:6.45e-12^RecName: Full=Na(+)/H(+) antiporter NhaD;^Bacteria; Proteobacteria; Gammaproteobacteria; Vibrionales; Vibrionaceae; Vibrio	1;1	1;1	1;1	;	2	1	1	1	1	0	0	1	0	0	1	0	0	5.4	5.4	5.4	17.808	167	167;190	0.019048	-0.0023912	By MS/MS			5.4	0	0	1914300	1914300	0	0	4795300	0	0	0	0	0	0
Unspecific	c162261/1/2338|m.66981;c9747/1/1521|m.9379	c162261/1/2338|m.66981;c9747/1/1521|m.9379	c162261/1/2338|m.66981	XYLL3_ARATH^XYLL3_ARATH^Q:143-194,H:246-297^73.077%ID^E:2e-16^RecName: Full=D-xylose-proton symporter-like 3, chloroplastic;^Eukaryota; Viridiplantae; Streptophyta; Embryophyta; Tracheophyta; Spermatophyta; Magnoliophyta; eudicotyledons; Gunneridae; Pentapetalae; rosids; malvids; Brassicales; Brassicaceae; Camelineae; Arabidopsis	1;1	1;1	1;1	;	2	1	1	1	1	1	1	1	1	1	1	1	1	4.1	4.1	4.1	24.95	218	218;445	0.018957	-0.0023912	By matching	By MS/MS	By matching	4.1	4.1	4.1	42392000	10914000	13845000	17633000	0	0	44241000	0	0	0	0
Unspecific	c171261/1/2195|m.73839;c162438/2/1211|m.67092	c171261/1/2195|m.73839;c162438/2/1211|m.67092	c171261/1/2195|m.73839	MINE1_ARATH^MINE1_ARATH^Q:2-198,H:34-228^65.482%ID^E:2.07e-82^RecName: Full=Cell division topological specificity factor homolog, chloroplastic;^Eukaryota; Viridiplantae; Streptophyta; Embryophyta; Tracheophyta; Spermatophyta; Magnoliophyta; eudicotyledons; Gunneridae; Pentapetalae; rosids; malvids; Brassicales; Brassicaceae; Camelineae; Arabidopsis	1;1	1;1	1;1	;	2	1	1	1	1	0	0	1	0	0	1	0	0	4.4	4.4	4.4	22.558	203	203;231	0.018868	-0.0023912	By MS/MS			4.4	0	0	146970	146970	0	0	368160	0	0	0	0	0	0
Unspecific	c26066/1/1501|m.16285;c201365/1/2074|m.77365	c26066/1/1501|m.16285;c201365/1/2074|m.77365	c26066/1/1501|m.16285	TTL12_MOUSE^TTL12_MOUSE^Q:300-791,H:290-454^37.349%ID^E:2.2e-57^RecName: Full=Tubulin--tyrosine ligase-like protein 12;^Eukaryota; Metazoa; Chordata; Craniata; Vertebrata; Euteleostomi; Mammalia; Eutheria; Euarchontoglires; Glires; Rodentia; Sciurognathi; Muroidea; Muridae; Murinae; Mus; Mus`TTL12_MOUSE^TTL12_MOUSE^Q:841-1302,H:477-630^36.905%ID^E:2.2e-57^RecName: Full=Tubulin--tyrosine ligase-li…	1;1	1;1	1;1	;	2	1	1	1	1	0	0	1	0	0	1	0	0	8	8	8	13.342	112	112;249	0.016598	-0.0023912	By MS/MS			8	0	0	3415500	3415500	0	0	8555800	0	0	0	0	0	0
Unspecific	c250550/1/1483|m.94751;c201536/1/1270|m.77486	c250550/1/1483|m.94751;c201536/1/1270|m.77486	c250550/1/1483|m.94751	WTR13_ARATH^WTR13_ARATH^Q:6-160,H:11-165^69.032%ID^E:5.55e-70^RecName: Full=WAT1-related protein At2g37460;^Eukaryota; Viridiplantae; Streptophyta; Embryophyta; Tracheophyta; Spermatophyta; Magnoliophyta; eudicotyledons; Gunneridae; Pentapetalae; rosids; malvids; Brassicales; Brassicaceae; Camelineae; Arabidopsis	1;1	1;1	1;1	;	2	1	1	1	0	1	0	0	1	0	0	1	0	5.6	5.6	5.6	17.47	161	161;250	0.016461	-0.0023912		By MS/MS		0	5.6	0	5521600	0	5521600	0	0	8058100	0	0	0	0	0
Unspecific	c214831/1/2581|m.88055;c203826/1/2089|m.79357	c214831/1/2581|m.88055;c203826/1/2089|m.79357	c214831/1/2581|m.88055	Y4837_ARATH^Y4837_ARATH^Q:1182-1493,H:329-430^39.623%ID^E:8.75e-09^RecName: Full=KH domain-containing protein At4g18375;^Eukaryota; Viridiplantae; Streptophyta; Embryophyta; Tracheophyta; Spermatophyta; Magnoliophyta; eudicotyledons; Gunneridae; Pentapetalae; rosids; malvids; Brassicales; Brassicaceae; Camelineae; Arabidopsis`Y4837_ARATH^Y4837_ARATH^Q:1126-1188,H:310-330^47.619%ID^E:8.75e-09^RecN…	1;1	1;1	1;1	;	2	1	1	1	0	0	1	0	0	1	0	0	1	7.7	7.7	7.7	12.674	117	117;571	0.016194	-0.0023912			By MS/MS	0	0	7.7	5443600	0	0	5443600	0	0	26070000	0	0	0	0
Unspecific	c204684/1/2120|m.80025;c71670/2/2119|m.39334	c204684/1/2120|m.80025;c71670/2/2119|m.39334	c204684/1/2120|m.80025	MAOP1_ARATH^MAOP1_ARATH^Q:3-78,H:193-268^68.421%ID^E:2.57e-26^RecName: Full=NADP-dependent malic enzyme 1;^Eukaryota; Viridiplantae; Streptophyta; Embryophyta; Tracheophyta; Spermatophyta; Magnoliophyta; eudicotyledons; Gunneridae; Pentapetalae; rosids; malvids; Brassicales; Brassicaceae; Camelineae; Arabidopsis	1;1	1;1	1;1	;	2	1	1	1	1	1	1	1	1	1	1	1	1	7.4	7.4	7.4	13.869	121	121;391	0.015936	-0.0023912	By matching	By MS/MS	By matching	7.4	7.4	7.4	4894400	3527300	440760	926370	6819800	0	0	0	0	0	0
Unspecific	c206678/1/1998|m.81626;c210290/1/1915|m.84489	c206678/1/1998|m.81626;c210290/1/1915|m.84489	c206678/1/1998|m.81626	HPPK_BACSU^HPPK_BACSU^Q:56-137,H:51-132^45.122%ID^E:5.18e-19^RecName: Full=2-amino-4-hydroxy-6-hydroxymethyldihydropteridine pyrophosphokinase;^Bacteria; Firmicutes; Bacilli; Bacillales; Bacillaceae; Bacillus	1;1	1;1	1;1	;	2	1	1	1	1	1	1	1	1	1	1	1	1	5.1	5.1	5.1	19.431	177	177;213	0.015385	-0.0023912	By matching	By MS/MS	By matching	5.1	5.1	5.1	396860	248180	104400	44269	600320	0	0	0	0	0	0
Unspecific	c255207/1/1675|m.98333;c212199/1/1597|m.85937	c255207/1/1675|m.98333;c212199/1/1597|m.85937	c255207/1/1675|m.98333	EFR_ARATH^EFR_ARATH^Q:19-167,H:13-152^32.215%ID^E:4.25e-14^RecName: Full=LRR receptor-like serine/threonine-protein kinase EFR;^Eukaryota; Viridiplantae; Streptophyta; Embryophyta; Tracheophyta; Spermatophyta; Magnoliophyta; eudicotyledons; Gunneridae; Pentapetalae; rosids; malvids; Brassicales; Brassicaceae; Camelineae; Arabidopsis	1;1	1;1	1;1	;	2	1	1	1	0	1	0	0	1	0	0	1	0	5.3	5.3	5.3	18.22	169	169;394	0.014599	-0.0023912		By MS/MS		0	5.3	0	2017600	0	2017600	0	0	2944400	0	0	0	0	0
Unspecific	c247880/1/1277|m.92813;c212750/1/1302|m.86376	c247880/1/1277|m.92813;c212750/1/1302|m.86376	c247880/1/1277|m.92813	PDV1_ARATH^PDV1_ARATH^Q:29-114,H:182-272^34.066%ID^E:2.77e-09^RecName: Full=Plastid division protein PDV1;^Eukaryota; Viridiplantae; Streptophyta; Embryophyta; Tracheophyta; Spermatophyta; Magnoliophyta; eudicotyledons; Gunneridae; Pentapetalae; rosids; malvids; Brassicales; Brassicaceae; Camelineae; Arabidopsis	1;1	1;1	1;1	;	2	1	1	1	1	0	0	1	0	0	1	0	0	7.9	7.9	7.9	13.077	114	114;264	0.014493	-0.0023912	By MS/MS			7.9	0	0	16196000	16196000	0	0	38701000	0	0	0	0	0	0
Unspecific	c32124/1/1411|m.20993;c24126/6/1394|m.14586	c32124/1/1411|m.20993;c24126/6/1394|m.14586	c32124/1/1411|m.20993	RVE6_ARATH^RVE6_ARATH^Q:1-129,H:1-141^58.219%ID^E:1.11e-44^RecName: Full=Protein REVEILLE 6;^Eukaryota; Viridiplantae; Streptophyta; Embryophyta; Tracheophyta; Spermatophyta; Magnoliophyta; eudicotyledons; Gunneridae; Pentapetalae; rosids; malvids; Brassicales; Brassicaceae; Camelineae; Arabidopsis	1;1	1;1	1;1	;	2	1	1	1	0	1	1	0	1	1	0	1	1	4.7	4.7	4.7	21.811	190	190;307	0.013793	-0.0023912		By MS/MS	By matching	0	4.7	4.7	10256000	0	4873900	5382500	0	0	19030000	0	0	0	0
Unspecific	c61406/2/1739|m.31399;c246389/2/1670|m.91639	c61406/2/1739|m.31399;c246389/2/1670|m.91639	c61406/2/1739|m.31399	TIF8_ARATH^TIF8_ARATH^Q:912-1250,H:171-265^46.154%ID^E:5.51e-17^RecName: Full=Protein TIFY 8;^Eukaryota; Viridiplantae; Streptophyta; Embryophyta; Tracheophyta; Spermatophyta; Magnoliophyta; eudicotyledons; Gunneridae; Pentapetalae; rosids; malvids; Brassicales; Brassicaceae; Camelineae; Arabidopsis	1;1	1;1	1;1	;	2	1	1	1	1	1	0	1	1	0	1	1	0	7.6	7.6	7.6	12.712	119	119;398	0.013652	-0.0023912	By MS/MS	By matching		7.6	7.6	0	660930	510090	150840	0	1218800	0	0	0	0	0	0
Unspecific	c296893/1/1445|m.83047;c246960/2/1814|m.92164	c296893/1/1445|m.83047;c246960/2/1814|m.92164	c296893/1/1445|m.83047	AGD5_ARATH^AGD5_ARATH^Q:1-394,H:97-482^26.622%ID^E:1.96e-23^RecName: Full=Probable ADP-ribosylation factor GTPase-activating protein AGD5;^Eukaryota; Viridiplantae; Streptophyta; Embryophyta; Tracheophyta; Spermatophyta; Magnoliophyta; eudicotyledons; Gunneridae; Pentapetalae; rosids; malvids; Brassicales; Brassicaceae; Camelineae; Arabidopsis	1;1	1;1	1;1	;	2	1	1	1	1	1	1	1	1	1	1	1	1	2.3	2.3	2.3	44.521	395	395;518	0.013605	-0.0023912	By matching	By MS/MS	By matching	2.3	2.3	2.3	7008700	3880100	2225000	903560	0	5807300	0	0	0	0	0
Unspecific	c248693/1/2086|m.93400;c37553/1/2199|m.25975	c248693/1/2086|m.93400;c37553/1/2199|m.25975	c248693/1/2086|m.93400	TAFCL_ARATH^TAFCL_ARATH^Q:132-331,H:482-681^66.667%ID^E:3.56e-82^RecName: Full=Transcription initiation factor TFIID subunit 12b;^Eukaryota; Viridiplantae; Streptophyta; Embryophyta; Tracheophyta; Spermatophyta; Magnoliophyta; eudicotyledons; Gunneridae; Pentapetalae; rosids; malvids; Brassicales; Brassicaceae; Camelineae; Arabidopsis	1;1	1;1	1;1	;	2	1	1	1	0	1	0	0	1	0	0	1	0	2.7	2.7	2.7	37.232	331	331;658	0.013468	-0.0023912		By MS/MS		0	2.7	0	7833800	0	7833800	0	0	17054000	0	0	0	0	0
Unspecific	c249866/1/1066|m.94233;c252848/1/1939|m.96504	c249866/1/1066|m.94233;c252848/1/1939|m.96504	c249866/1/1066|m.94233	.	1;1	1;1	1;1	;	2	1	1	1	0	1	0	0	1	0	0	1	0	6.4	6.4	6.4	15.651	141	141;334	0.013378	-0.0023912		By MS/MS		0	6.4	0	2024700	0	2024700	0	0	8525500	0	0	0	0	0
Unspecific	c26666/1/1467|m.16760;c250209/1/2113|m.94493	c26666/1/1467|m.16760;c250209/1/2113|m.94493	c26666/1/1467|m.16760	Y1301_ARATH^Y1301_ARATH^Q:5-127,H:513-634^69.048%ID^E:9.48e-48^RecName: Full=BTB/POZ domain-containing protein At1g03010;^Eukaryota; Viridiplantae; Streptophyta; Embryophyta; Tracheophyta; Spermatophyta; Magnoliophyta; eudicotyledons; Gunneridae; Pentapetalae; rosids; malvids; Brassicales; Brassicaceae; Camelineae; Arabidopsis	1;1	1;1	1;1	;	2	1	1	1	1	0	1	1	0	1	1	0	1	7.1	7.1	7.1	14.352	127	127;416	0.013289	-0.0023912	By MS/MS		By matching	7.1	0	7.1	3875600	1369900	0	2505600	3368500	0	0	0	0	0	0
Unspecific	c303994/1/1678|m.28483;c251607/1/1890|m.95543	c303994/1/1678|m.28483;c251607/1/1890|m.95543	c303994/1/1678|m.28483	MAP1B_ARATH^MAP1B_ARATH^Q:1-178,H:169-347^77.095%ID^E:3.73e-96^RecName: Full=Methionine aminopeptidase 1B, chloroplastic {ECO:0000255|HAMAP-Rule:MF_03174};^Eukaryota; Viridiplantae; Streptophyta; Embryophyta; Tracheophyta; Spermatophyta; Magnoliophyta; eudicotyledons; Gunneridae; Pentapetalae; rosids; malvids; Brassicales; Brassicaceae; Camelineae; Arabidopsis	1;1	1;1	1;1	;	2	1	1	1	0	1	0	0	1	0	0	1	0	4.8	4.8	4.8	20.304	187	187;381	0.013029	-0.0023912		By MS/MS		0	4.8	0	2657300	0	2657300	0	0	11189000	0	0	0	0	0
Unspecific	c36103/2/1583|m.24554;c252422/1/1541|m.96176	c36103/2/1583|m.24554;c252422/1/1541|m.96176	c36103/2/1583|m.24554	ORYA_ORYSJ^ORYA_ORYSJ^Q:15-209,H:129-325^61.421%ID^E:4.78e-79^RecName: Full=Oryzain alpha chain;^Eukaryota; Viridiplantae; Streptophyta; Embryophyta; Tracheophyta; Spermatophyta; Magnoliophyta; Liliopsida; Poales; Poaceae; BEP clade; Ehrhartoideae; Oryzeae; Oryza	1;1	1;1	1;1	;	2	1	1	1	1	0	0	1	0	0	1	0	0	4.2	4.2	4.2	23.277	213	213;444	0.012945	-0.0023912	By MS/MS			4.2	0	0	2726500	2726500	0	0	6830100	0	0	0	0	0	0
Unspecific	c260908/1/2504|m.102520;c72750/1/1437|m.40200	c260908/1/2504|m.102520;c72750/1/1437|m.40200	c260908/1/2504|m.102520	.	1;1	1;1	1;1	;	2	1	1	1	1	1	1	1	1	1	1	1	1	8.7	8.7	8.7	12.908	103	103;234	0.012232	-0.0023912	By matching	By MS/MS	By matching	8.7	8.7	8.7	21980000	9065000	9044800	3870200	0	26222000	0	0	0	0	0
Unspecific	c26123/3/1843|m.16330;c305400/1/1553|m.29147	c26123/3/1843|m.16330;c305400/1/1553|m.29147	c26123/3/1843|m.16330	YMB8_YEAST^YMB8_YEAST^Q:4-217,H:12-198^31.797%ID^E:3.67e-21^RecName: Full=Uncharacterized vacuolar membrane protein YML018C;^Eukaryota; Fungi; Dikarya; Ascomycota; Saccharomycotina; Saccharomycetes; Saccharomycetales; Saccharomycetaceae; Saccharomyces	1;1	1;1	1;1	;	2	1	1	1	0	1	0	0	1	0	0	1	0	3.6	3.6	3.6	27.36	249	249;395	0.012195	-0.0023912		By MS/MS		0	3.6	0	10901000	0	10901000	0	0	15909000	0	0	0	0	0
Unspecific	c70514/1/1319|m.38360;c28937/4/1653|m.18474	c70514/1/1319|m.38360;c28937/4/1653|m.18474	c70514/1/1319|m.38360	RPD1_ARATH^RPD1_ARATH^Q:6-101,H:264-366^39.806%ID^E:1.42e-14^RecName: Full=Protein ROOT PRIMORDIUM DEFECTIVE 1;^Eukaryota; Viridiplantae; Streptophyta; Embryophyta; Tracheophyta; Spermatophyta; Magnoliophyta; eudicotyledons; Gunneridae; Pentapetalae; rosids; malvids; Brassicales; Brassicaceae; Camelineae; Arabidopsis	1;1	1;1	1;1	;	2	1	1	1	0	0	1	0	0	1	0	0	1	8	8	8	13.192	112	112;419	0.011662	-0.0023912			By MS/MS	0	0	8	20797000	0	0	20797000	0	0	31529000	0	0	0	0
Unspecific	c38287/1/1376|m.26681;c29346/1/1702|m.18808	c38287/1/1376|m.26681;c29346/1/1702|m.18808	c38287/1/1376|m.26681	TM10A_BOVIN^TM10A_BOVIN^Q:2-58,H:220-276^59.649%ID^E:1.9e-19^RecName: Full=tRNA methyltransferase 10 homolog A;^Eukaryota; Metazoa; Chordata; Craniata; Vertebrata; Euteleostomi; Mammalia; Eutheria; Laurasiatheria; Cetartiodactyla; Ruminantia; Pecora; Bovidae; Bovinae; Bos	1;1	1;1	1;1	;	2	1	1	1	1	0	0	1	0	0	1	0	0	7.5	7.5	7.5	14.311	120	120;356	0.011561	-0.0023912	By MS/MS			7.5	0	0	2209900	2209900	0	0	5536000	0	0	0	0	0	0
Unspecific	c5196/1/1699|m.5095;c9215/1/1576|m.8913	c5196/1/1699|m.5095;c9215/1/1576|m.8913	c5196/1/1699|m.5095	YJNA_SCHPO^YJNA_SCHPO^Q:1407-1697,H:68-166^48.485%ID^E:7.94e-24^RecName: Full=Uncharacterized AAA domain-containing protein C24B10.10c;^Eukaryota; Fungi; Dikarya; Ascomycota; Taphrinomycotina; Schizosaccharomycetes; Schizosaccharomycetales; Schizosaccharomycetaceae; Schizosaccharomyces	1;1	1;1	1;1	;	2	1	1	1	1	0	0	1	0	0	1	0	0	2.6	2.6	2.6	38.734	344	344;525	0.010471	-0.0023912	By MS/MS			2.6	0	0	3066100	3066100	0	0	7680700	0	0	0	0	0	0
Unspecific	c8930/1/1768|m.8639;c8052/6/1726|m.7802	c8930/1/1768|m.8639;c8052/6/1726|m.7802	c8930/1/1768|m.8639	BPM2_ARATH^BPM2_ARATH^Q:1-256,H:1-255^70.817%ID^E:8.3e-130^RecName: Full=BTB/POZ and MATH domain-containing protein 2;^Eukaryota; Viridiplantae; Streptophyta; Embryophyta; Tracheophyta; Spermatophyta; Magnoliophyta; eudicotyledons; Gunneridae; Pentapetalae; rosids; malvids; Brassicales; Brassicaceae; Camelineae; Arabidopsis	1;1	1;1	1;1	;	2	1	1	1	0	1	0	0	1	0	0	1	0	3.2	3.2	3.2	31.284	282	282;407	0.0098765	-0.0023912		By MS/MS		0	3.2	0	323530	0	323530	0	0	1362300	0	0	0	0	0
Unspecific	c8857/1/1586|m.8576;c9328/1/1652|m.9002	c8857/1/1586|m.8576;c9328/1/1652|m.9002	c8857/1/1586|m.8576	.	1;1	1;1	1;1	;	2	1	1	1	1	0	0	1	0	0	1	0	0	2.8	2.8	2.8	36.05	327	327;426	0.0098039	-0.0023912	By MS/MS			2.8	0	0	6510300	6510300	0	0	15694000	0	0	0	0	0	0
Unspecific	c127435/3/1663|m.59379;c63629/1/1766|m.33147;c201528/1/1648|m.77479	c127435/3/1663|m.59379;c63629/1/1766|m.33147;c201528/1/1648|m.77479	c127435/3/1663|m.59379	BRCC3_XENTR^BRCC3_XENTR^Q:1-189,H:1-197^46.766%ID^E:4.09e-54^RecName: Full=Lys-63-specific deubiquitinase BRCC36;^Eukaryota; Metazoa; Chordata; Craniata; Vertebrata; Euteleostomi; Amphibia; Batrachia; Anura; Pipoidea; Pipidae; Xenopodinae; Xenopus; Silurana	1;1;1	1;1;1	1;1;1	;;	3	1	1	1	0	0	1	0	0	1	0	0	1	8.3	8.3	8.3	24.899	230	230;432;432	0	0.67989			By MS/MS	0	0	8.3	0	0	0	0	0	0	0	0	0	1	1
Unspecific	c299061/1/1449|m.25362;c255722/1/1351|m.98700;c14914/1/1488|m.13830	c299061/1/1449|m.25362;c255722/1/1351|m.98700;c14914/1/1488|m.13830	c299061/1/1449|m.25362	WEX_ARATH^WEX_ARATH^Q:28-168,H:143-282^61.702%ID^E:4.79e-55^RecName: Full=Werner Syndrome-like exonuclease;^Eukaryota; Viridiplantae; Streptophyta; Embryophyta; Tracheophyta; Spermatophyta; Magnoliophyta; eudicotyledons; Gunneridae; Pentapetalae; rosids; malvids; Brassicales; Brassicaceae; Camelineae; Arabidopsis	1;1;1	1;1;1	1;1;1	;;	3	1	1	1	1	0	0	1	0	0	1	0	0	10.5	10.5	10.5	19.015	171	171;307;318	0	0.81651	By MS/MS			10.5	0	0	9554100	9554100	0	0	40672000	0	0	1	0	0	1
Unspecific	c216689/1/1507|m.89586;c306314/1/1848|m.29540;c165203/1/1784|m.69197	c216689/1/1507|m.89586;c306314/1/1848|m.29540;c165203/1/1784|m.69197	c216689/1/1507|m.89586	. hypothetical protein A4A49_35399 [Nicotiana attenuata]^91%^E:5e-73	1;1;1	1;1;1	1;1;1	;;	3	1	1	1	0	0	1	0	0	1	0	0	1	7.6	7.6	7.6	20.954	184	184;464;487	0	0.56719			By MS/MS	0	0	7.6	28476000	0	0	28476000	0	0	26964000	0	0	1	1
Unspecific	c258562/1/1551|m.100779;c170533/1/1440|m.73320;c67210/1/1620|m.35794	c258562/1/1551|m.100779;c170533/1/1440|m.73320;c67210/1/1620|m.35794	c258562/1/1551|m.100779	CAX1_ARATH^CAX1_ARATH^Q:3-241,H:213-453^66.255%ID^E:1.42e-102^RecName: Full=Vacuolar cation/proton exchanger 1;^Eukaryota; Viridiplantae; Streptophyta; Embryophyta; Tracheophyta; Spermatophyta; Magnoliophyta; eudicotyledons; Gunneridae; Pentapetalae; rosids; malvids; Brassicales; Brassicaceae; Camelineae; Arabidopsis	1;1;1	1;1;1	1;1;1	;;	3	1	1	1	1	0	0	1	0	0	1	0	0	4.1	4.1	4.1	25.95	244	244;371;480	0.022222	0.0071953	By MS/MS			4.1	0	0	6113800	6113800	0	0	14197000	0	0	1	0	0	1
Unspecific	c202727/1/1203|m.78460;c214988/2/1599|m.88168;c207497/1/2097|m.82264	c202727/1/1203|m.78460;c214988/2/1599|m.88168;c207497/1/2097|m.82264	c202727/1/1203|m.78460	IF5Y_ARATH^IF5Y_ARATH^Q:1-117,H:161-272^57.265%ID^E:1.52e-22^RecName: Full=Probable eukaryotic translation initiation factor 5-1;^Eukaryota; Viridiplantae; Streptophyta; Embryophyta; Tracheophyta; Spermatophyta; Magnoliophyta; eudicotyledons; Gunneridae; Pentapetalae; rosids; malvids; Brassicales; Brassicaceae; Camelineae; Arabidopsis	1;1;1	1;1;1	1;1;1	;;	3	1	1	1	1	0	0	1	0	0	1	0	0	14	14	14	13.328	121	121;273;321	0	0.35735	By MS/MS			14	0	0	0	0	0	0	0	0	0	1	0	0	1
Unspecific	c246566/1/1314|m.91878;c247506/1/2337|m.92569;c261587/1/2398|m.103078	c246566/1/1314|m.91878;c247506/1/2337|m.92569;c261587/1/2398|m.103078	c246566/1/1314|m.91878	AB9C_ARATH^AB9C_ARATH^Q:546-1115,H:1309-1498^77.895%ID^E:2.92e-95^RecName: Full=ABC transporter C family member 9;^Eukaryota; Viridiplantae; Streptophyta; Embryophyta; Tracheophyta; Spermatophyta; Magnoliophyta; eudicotyledons; Gunneridae; Pentapetalae; rosids; malvids; Brassicales; Brassicaceae; Camelineae; Arabidopsis`AB9C_ARATH^AB9C_ARATH^Q:618-1070,H:696-847^26.797%ID^E:5.12e-10^RecName: Full…	1;1;1	1;1;1	1;1;1	;;	3	1	1	1	1	1	0	1	1	0	1	1	0	7.8	7.8	7.8	13.924	128	128;255;582	0	0.48492	By MS/MS	By matching		7.8	7.8	0	43302000	42900000	402350	0	46099000	0	0	1	0	0	1
Unspecific	c297938/1/1465|m.24261;c64297/5/1668|m.33640;c165891/1/1787|m.69696	c297938/1/1465|m.24261;c64297/5/1668|m.33640;c165891/1/1787|m.69696	c297938/1/1465|m.24261	NEP1_NEPGR^NEP1_NEPGR^Q:1-347,H:1-340^56.695%ID^E:1.9e-123^RecName: Full=Aspartic proteinase nepenthesin-1;^Eukaryota; Viridiplantae; Streptophyta; Embryophyta; Tracheophyta; Spermatophyta; Magnoliophyta; eudicotyledons; Gunneridae; Pentapetalae; Caryophyllales; Nepenthaceae; Nepenthes	2;2;2	2;2;2	2;2;2	;;	3	2	2	2	1	1	1	1	1	1	1	1	1	3.4	3.4	3.4	37.566	349	349;447;447	0	8.3369	By MS/MS	By matching	By MS/MS	2.9	2.9	3.2	54856000	21935000	25682000	7239300	0	0	21929000	1	0	2	3
Unspecific	c216973/1/1450|m.89828;c216517/1/1493|m.89426;c127800/1/1189|m.59651	c216973/1/1450|m.89828	c216973/1/1450|m.89828	. Npr1 C-terminal peptidase [Nepenthes alata]^90%^E:0 Raff|c24099/1/1496;Hook|c5850/1/1450;ven_illu|TR80436;refPB|c162227/1/1496;refPB|c216973/1/1450;	23;1;1	2;0;0	2;0;0		3	23	2	2	1	21	14	0	2	0	0	2	0	37.5	8.8	8.8	42.817	387	387;147;164	0	24.226	By matching	By MS/MS	By matching	3.4	35.4	17.8	20067000	0	20067000	0	0	40861000	0	0	13	0	13
Unspecific	c263229/1/1282|m.6297;c306727/1/1235|m.29772;c339246/1/1203|m.76638	c263229/1/1282|m.6297;c306727/1/1235|m.29772	c263229/1/1282|m.6297	PER1_ARAHY^PER1_ARAHY^Q:27-327,H:16-316^70.764%ID^E:3.23e-154^RecName: Full=Cationic peroxidase 1;^Eukaryota; Viridiplantae; Streptophyta; Embryophyta; Tracheophyta; Spermatophyta; Magnoliophyta; eudicotyledons; Gunneridae; Pentapetalae; rosids; fabids; Fabales; Fabaceae; Papilionoideae; Dalbergieae; Arachis	4;3;1	4;3;1	4;3;1	;	3	4	4	4	4	1	1	4	1	1	4	1	1	14.4	14.4	14.4	35.113	327	327;263;131	0	146.21	By MS/MS	By matching	By matching	14.4	3.4	3.4	58620000	54294000	1181500	3144800	147090000	0	0	16	0	0	16
[truncated: 82 more rows]
[truncated: 9 more columns]

## Sheet: Summary
Summary of proteins identified from the pitcher fluids of three Nepenthes species.
								Transcript ID (Top hit)
[truncated: 237 more rows]
[truncated: 12 more columns]

## Sheet: eggNOG5
eggNOG 5.0 classification
											Hypergeometric test
Funcat						Category	Pitcher	Fluid	%Pitcher	%Fluid	Enrichment factor	P
A	RNA processing and modification					A	2232	3	4.19273	1.76471	0.420897	0.0462491
B	Chromatin structure and dynamics					B	471	1	0.884756	0.588235	0.664856	0.335239
C	Energy production and conversion					C	3153	6	5.9228	3.52941	0.595903	0.0592161
[truncated: 57 more rows]
